# Supplementary material
Source: publisher site journal article supplement (https://www.dovepress.com/article/397305)
Supplement: Supplementary file 1 [file get_supplementary_file.php]

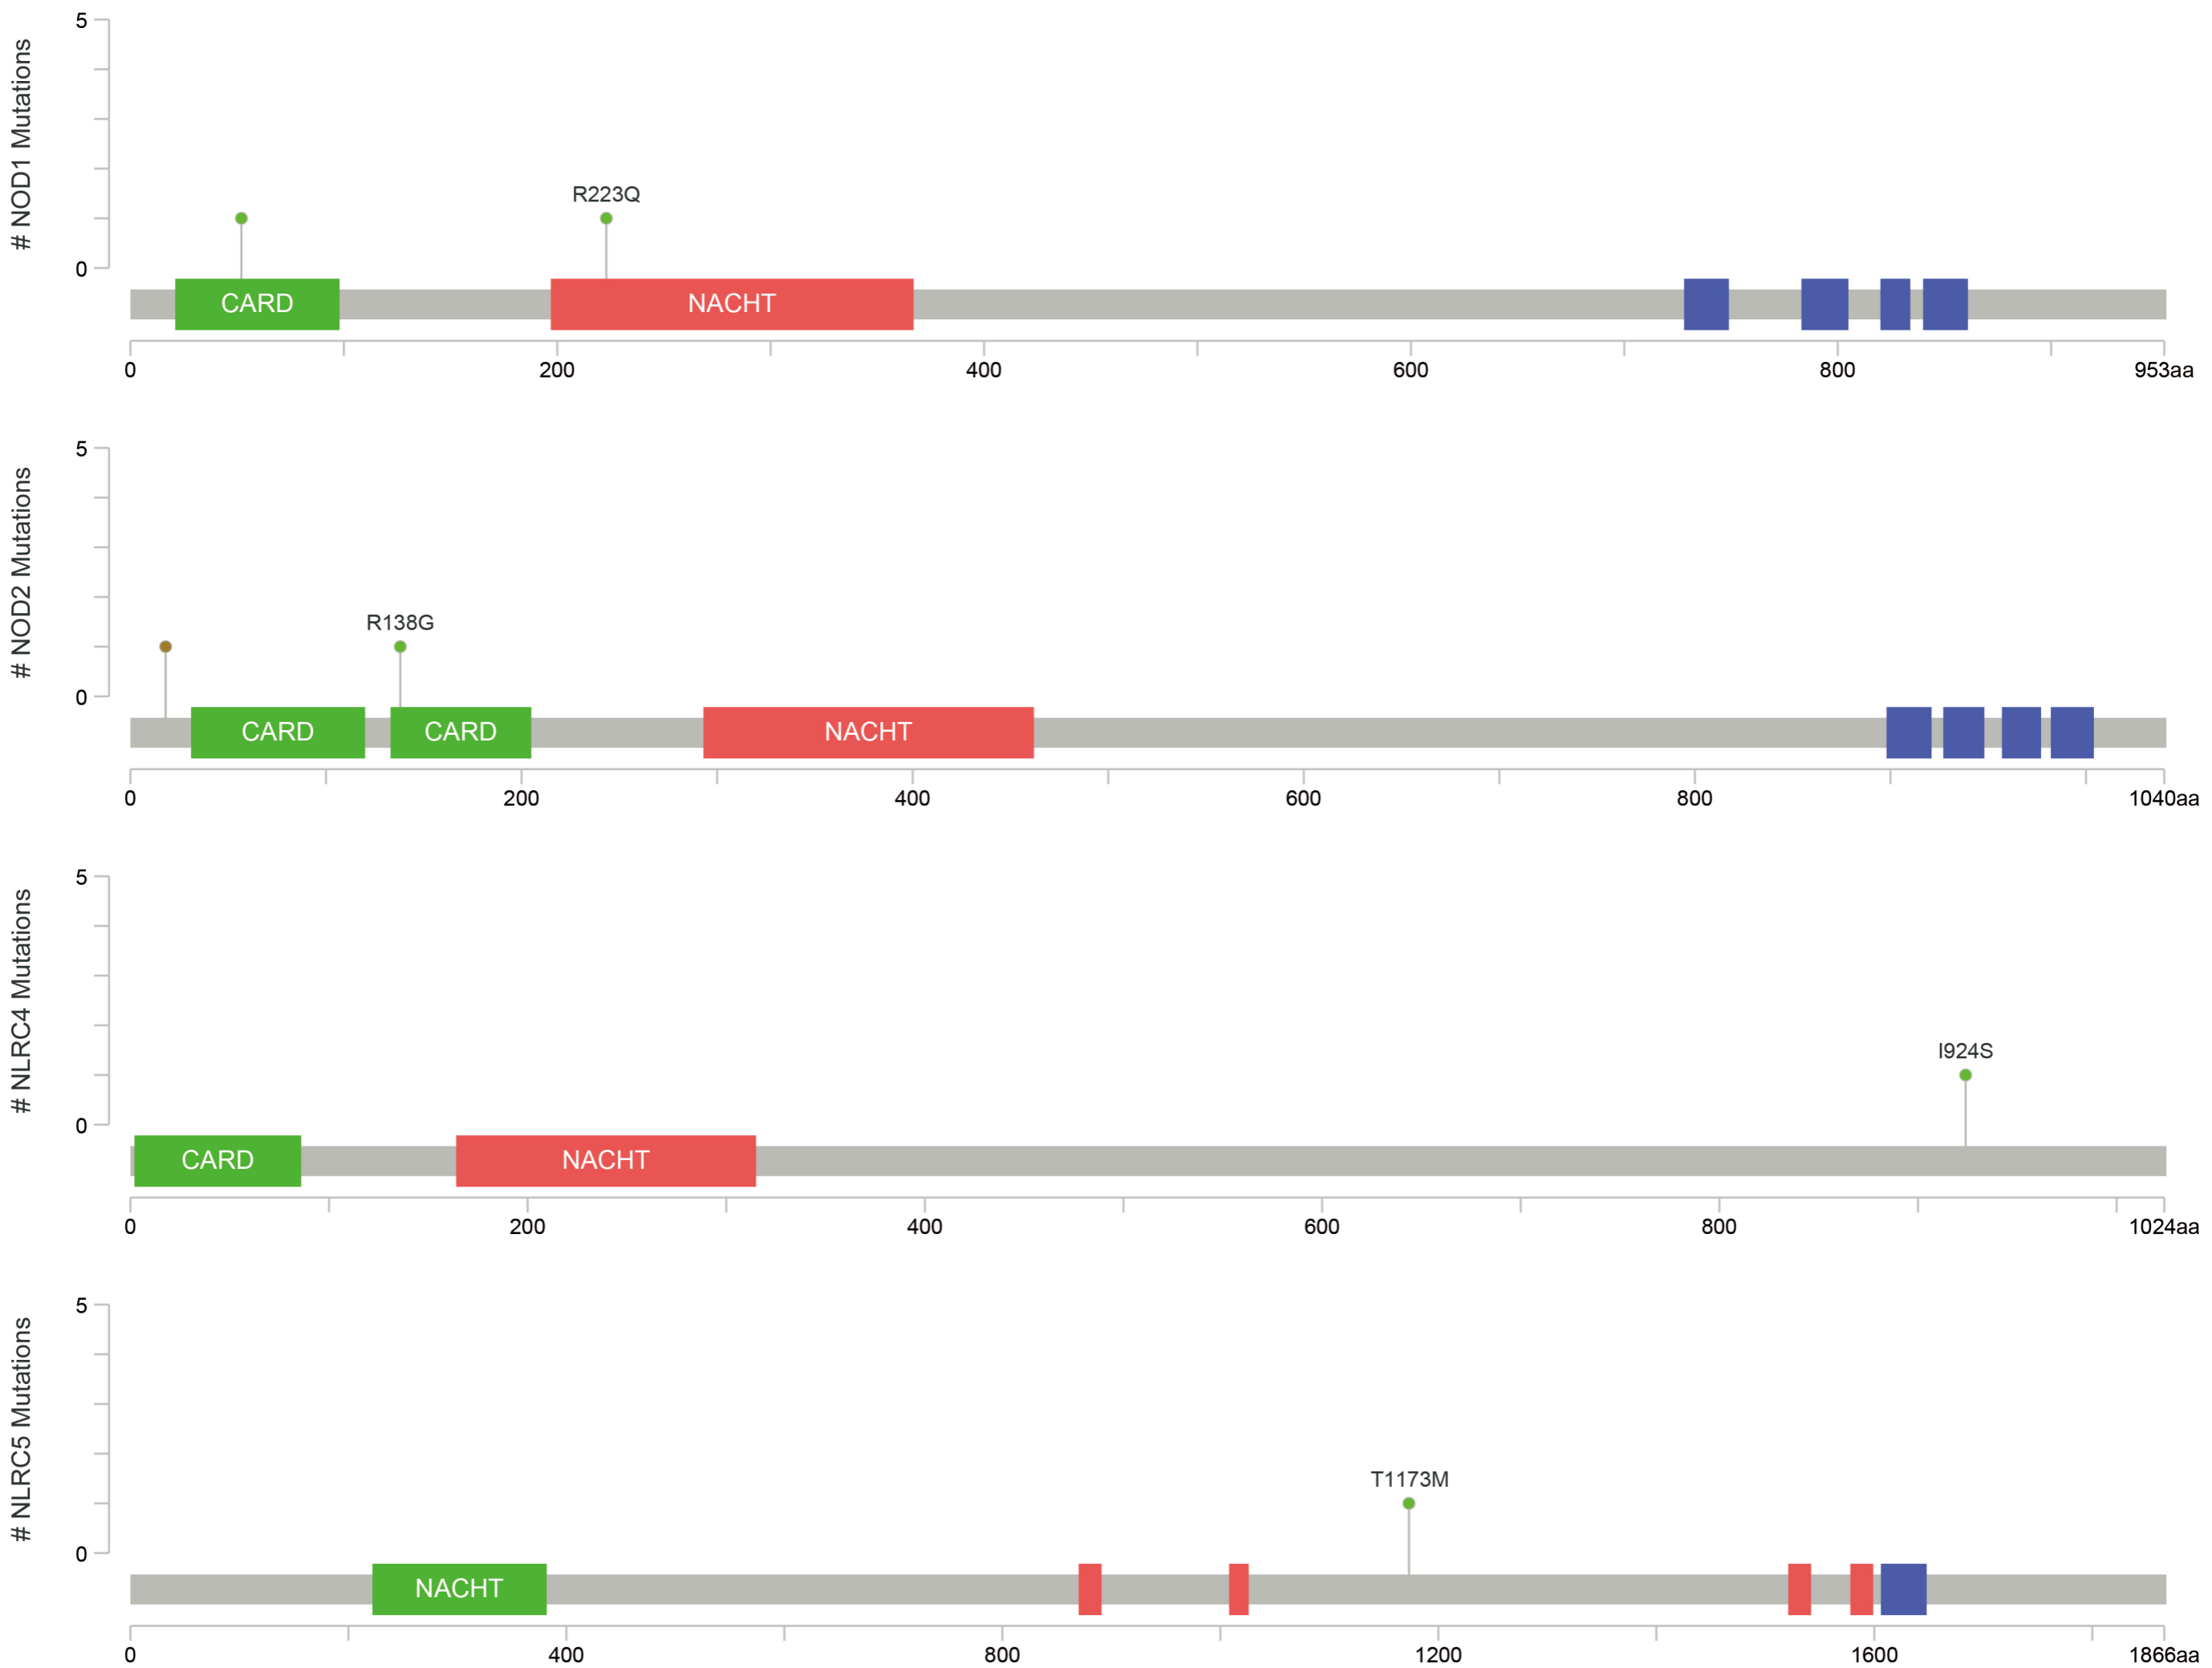

**Figure S1. Mutation position of NOD1, NOD2, NLRC4, and NLRC5.** Green circles present missense mutations (unknown significance), brown circles present inframe mutations (unknown significance).

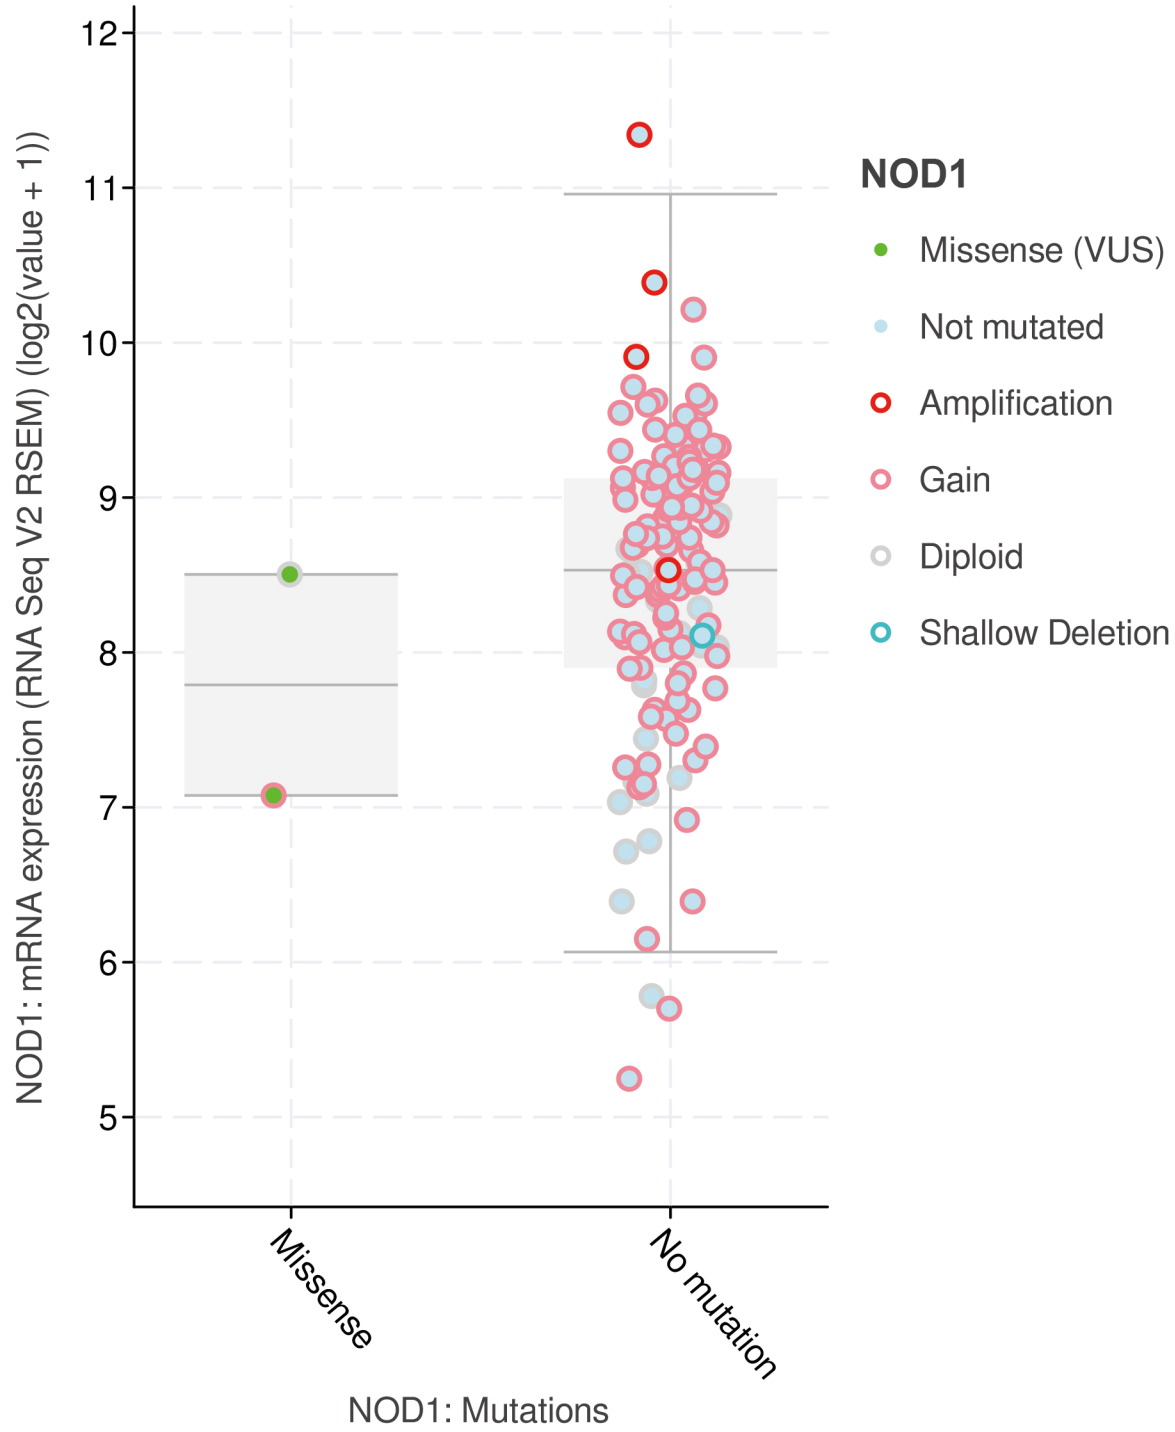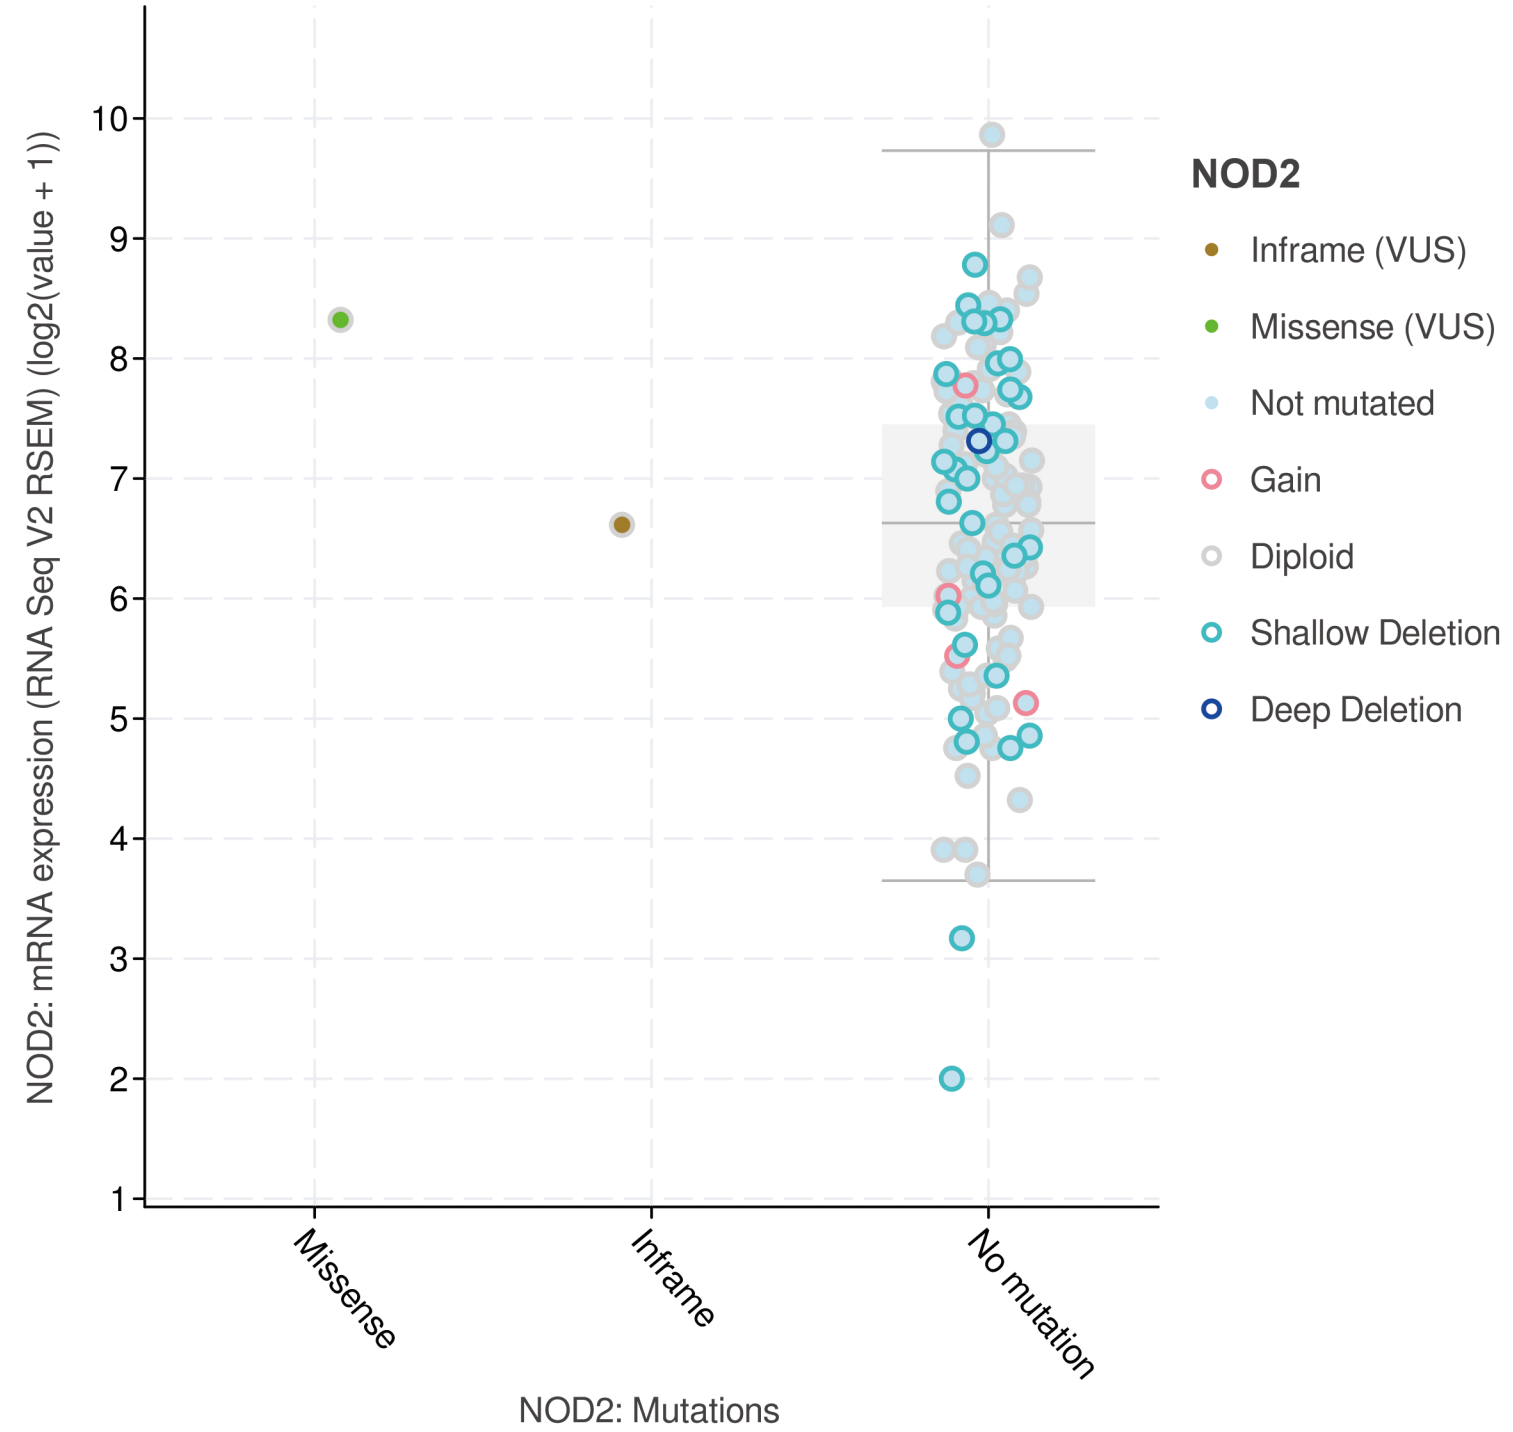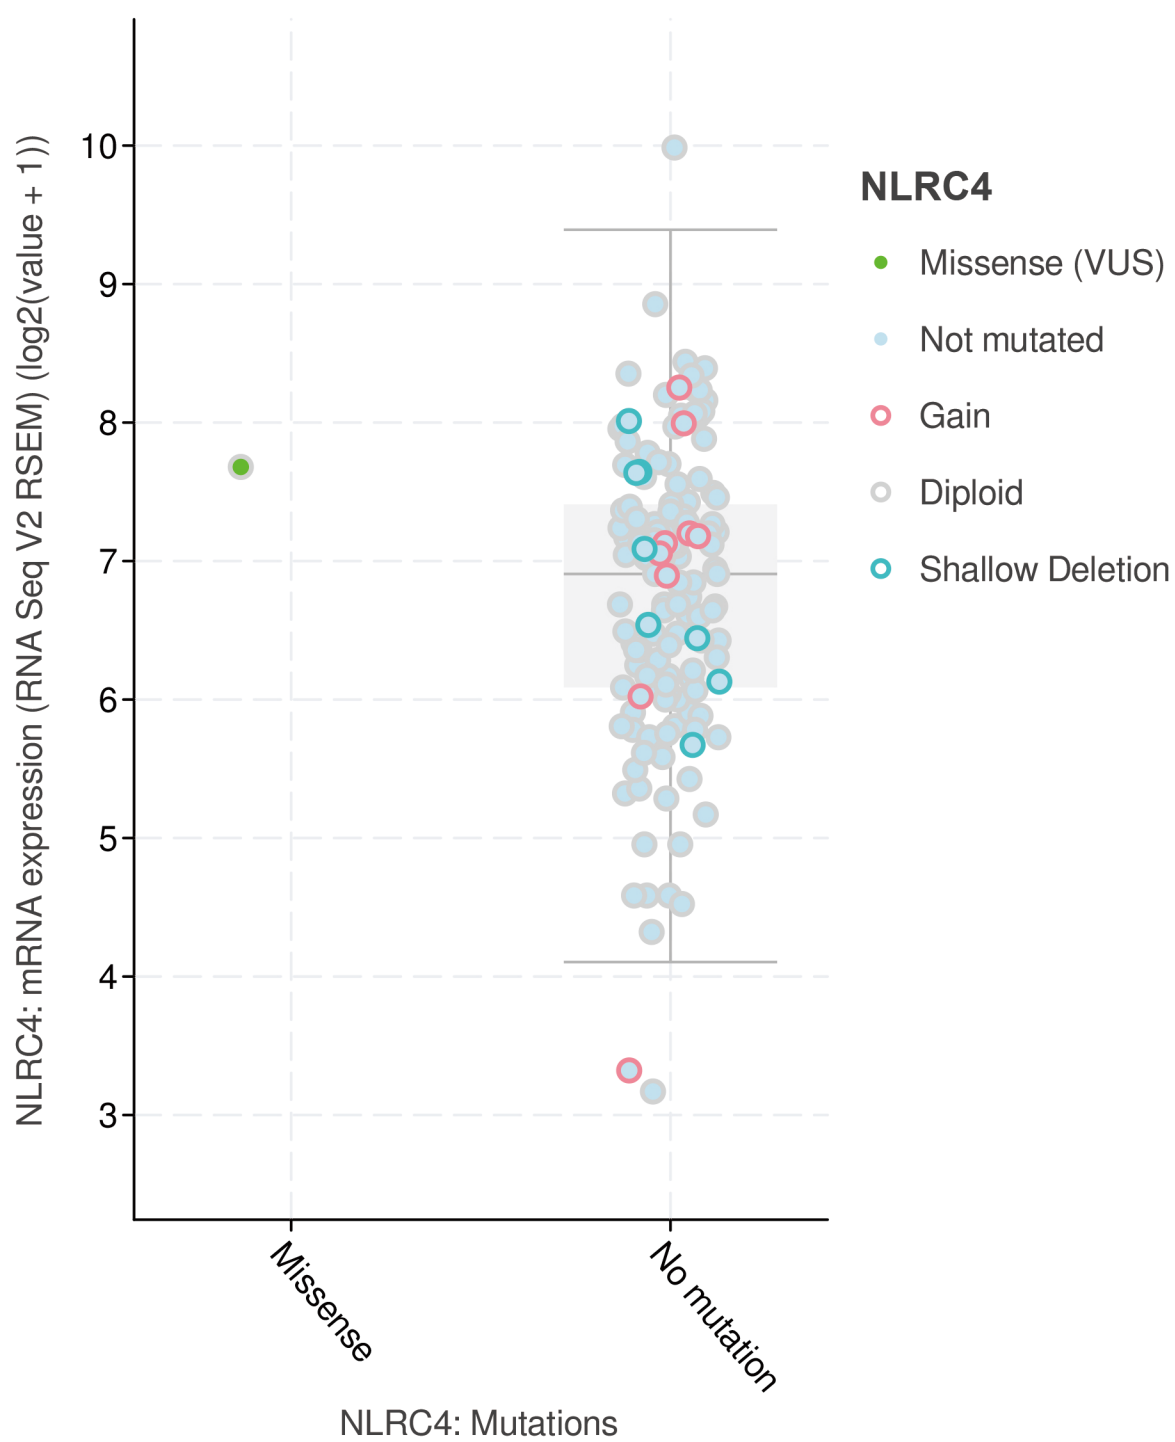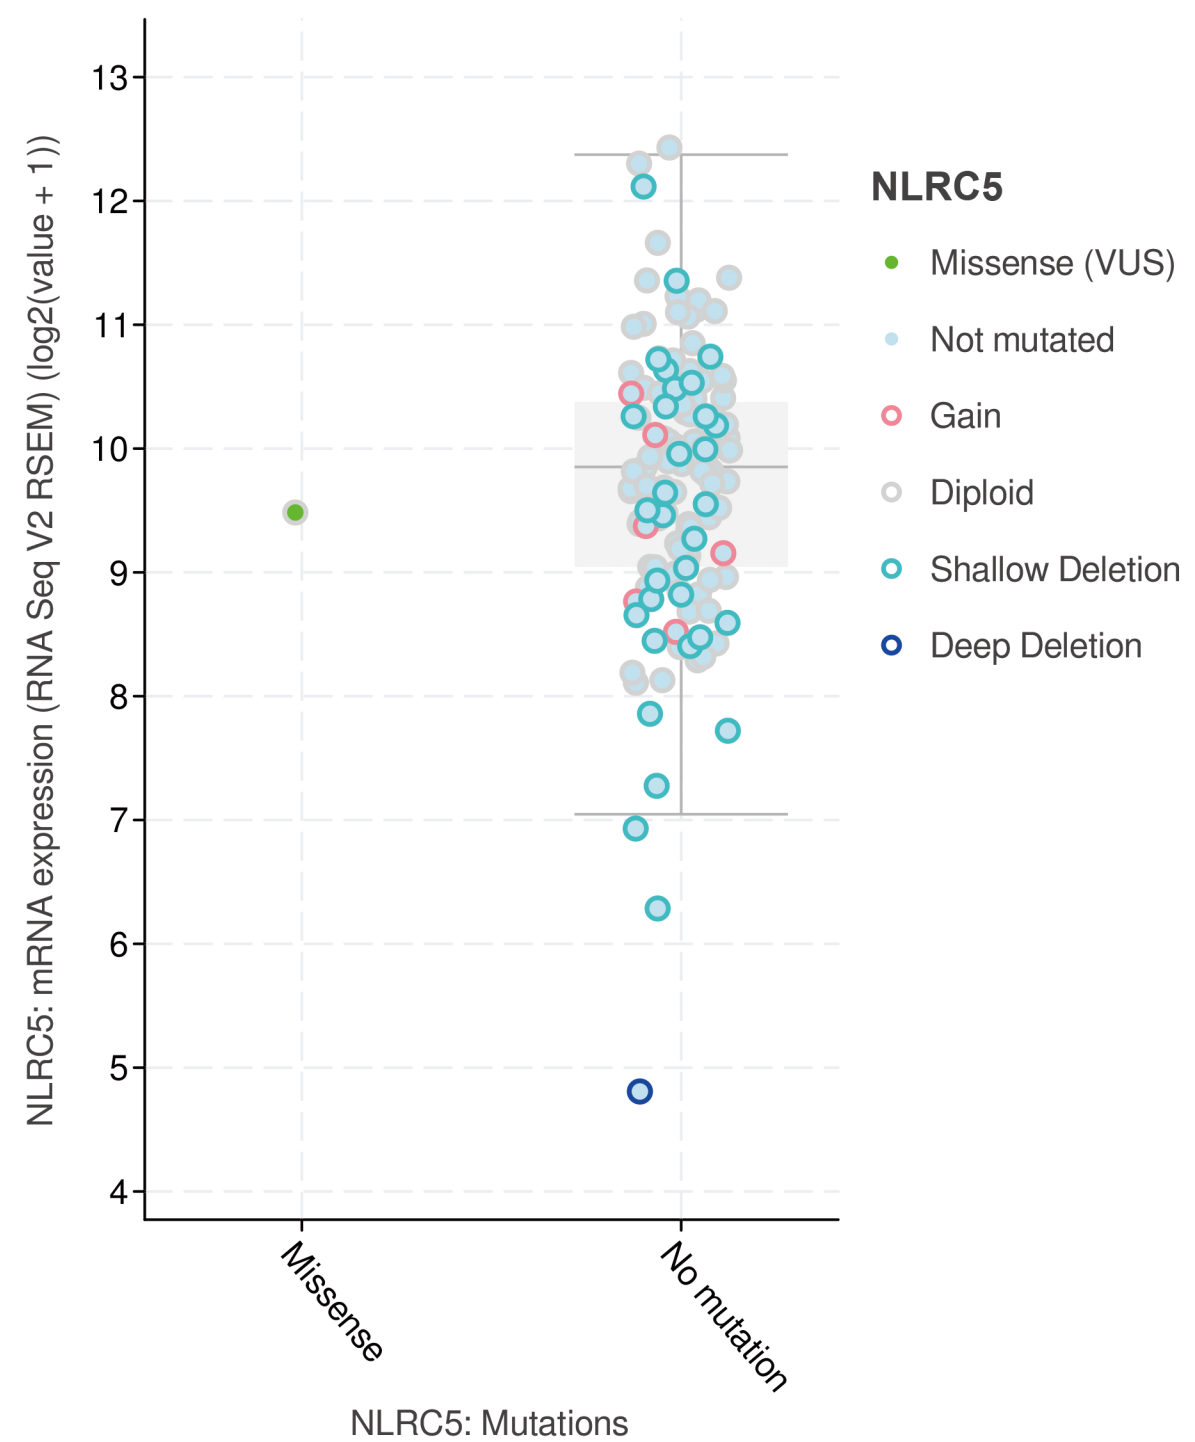

**Figure S2. Correlations between mutations and mRNA expression.** Sample circles are colored with respect to the corresponding mutation types and copy number.

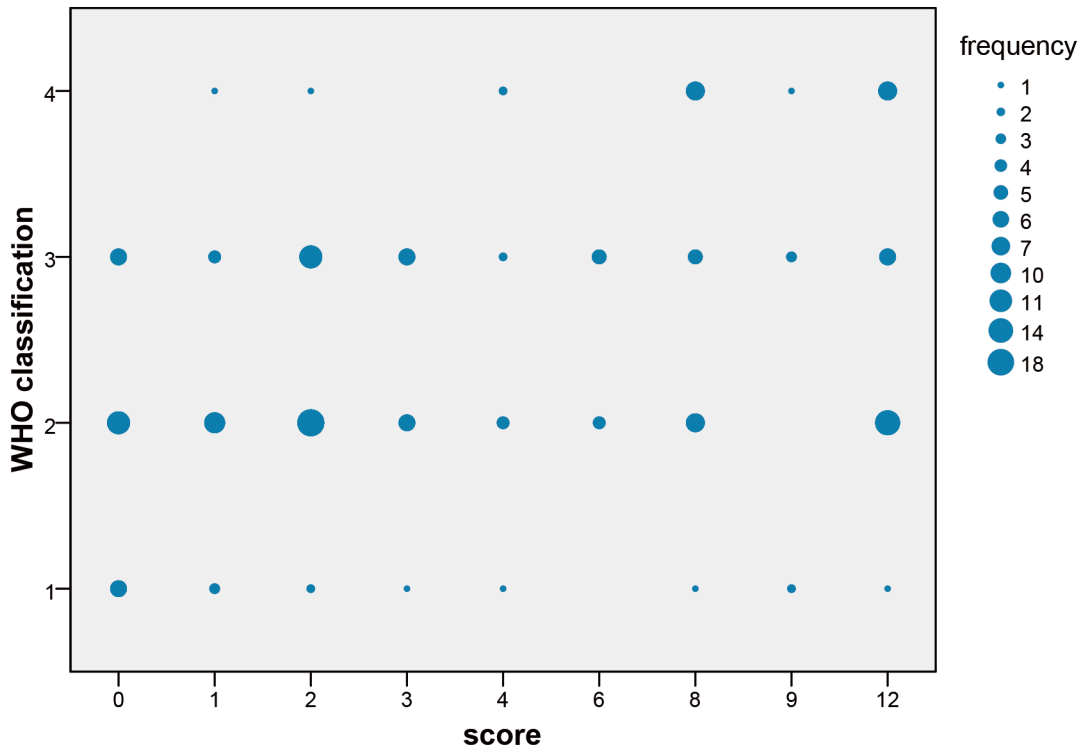

**Figure S3. Correlations between expression level score of NOD1 and WHO classification.**

Table S1. Data of GO analysis

| ONTOL<br>OGY | ID             | Description                                                                       | Gene<br>Ratio | Bg<br>Ratio   | p<br>value      | p.<br>adjust    | Q<br>value      | geneID                                                                                                                                                                                      | Count |
|--------------|----------------|-----------------------------------------------------------------------------------|---------------|---------------|-----------------|-----------------|-----------------|---------------------------------------------------------------------------------------------------------------------------------------------------------------------------------------------|-------|
| BP           | GO:000<br>6959 | humoral<br>immune<br>response                                                     | 27/265        | 356/1<br>8670 | 1.42088<br>E-12 | 4.01539<br>E-09 | 3.66735<br>E-09 | CR1/FCN1/IGHE/IGHG2/IGHG4/IGHM/IL6/PI3/KLK7/REG1A/REG1B/CCL13/CXCL5/CXCL13/CFHR4/KLK5<br>/IGHV6-1/IGHV5-51/IGHV4-61/IGHV4-59/IGHV4-31/IGHV4-28/IGHV3-15/IGHV1-18/IGKV5-2/IGKV1-<br>39/IgLL5 | 27    |
| BP           | GO:007<br>2376 | protein<br>activation<br>cascade                                                  | 20/265        | 198/1<br>8670 | 7.38162<br>E-12 | 1.04302<br>E-08 | 9.52617<br>E-09 | APOH/CR1/F13A1/FCN1/IGHE/IGHG2/IGHG4/IGHM/CFHR4/IGHV6-1/IGHV5-51/IGHV4-61/IGHV4-<br>59/IGHV4-31/IGHV4-28/IGHV3-15/IGHV1-18/IGKV5-2/IGKV1-39/IgLL5                                           | 20    |
| BP           | GO:000<br>6910 | phagocytosis,<br>recognition                                                      | 14/265        | 84/18<br>670  | 1.2512E<br>-11  | 1.17864<br>E-08 | 1.07648<br>E-08 | FCN1/IGHE/IGHG2/IGHG4/IGHM/IGHV6-1/IGHV5-51/IGHV4-61/IGHV4-59/IGHV4-31/IGHV4-28/IGHV3-<br>15/IGHV1-18/IgLL5                                                                                 | 14    |
| BP           | GO:000<br>6956 | complement<br>activation                                                          | 18/265        | 175/1<br>8670 | 6.28851<br>E-11 | 4.44283<br>E-08 | 4.05774<br>E-08 | CR1/FCN1/IGHE/IGHG2/IGHG4/IGHM/CFHR4/IGHV6-1/IGHV5-51/IGHV4-61/IGHV4-59/IGHV4-31/IGHV4-<br>28/IGHV3-15/IGHV1-18/IGKV5-2/IGKV1-39/IgLL5                                                      | 18    |
| BP           | GO:000<br>6958 | complement<br>activation,<br>classical<br>pathway                                 | 16/265        | 137/1<br>8670 | 1.10299<br>E-10 | 6.23412<br>E-08 | 5.69377<br>E-08 | CR1/IGHE/IGHG2/IGHG4/IGHM/IGHV6-1/IGHV5-51/IGHV4-61/IGHV4-59/IGHV4-31/IGHV4-28/IGHV3-<br>15/IGHV1-18/IGKV5-2/IGKV1-39/IgLL5                                                                 | 16    |
| BP           | GO:000<br>2455 | humoral<br>immune<br>response<br>mediated by<br>circulating<br>immunoglobul<br>in | 16/265        | 150/1<br>8670 | 4.33176<br>E-10 | 2.04026<br>E-07 | 1.86342<br>E-07 | CR1/IGHE/IGHG2/IGHG4/IGHM/IGHV6-1/IGHV5-51/IGHV4-61/IGHV4-59/IGHV4-31/IGHV4-28/IGHV3-<br>15/IGHV1-18/IGKV5-2/IGKV1-39/IgLL5                                                                 | 16    |
| BP           | GO:000<br>6911 | phagocytosis,<br>engulfment                                                       | 14/265        | 118/1<br>8670 | 1.33906<br>E-09 | 5.40597<br>E-07 | 4.9374E<br>-07  | IGHE/IGHG2/IGHG4/IGHM/THBS1/IGHV6-1/IGHV5-51/IGHV4-61/IGHV4-59/IGHV4-31/IGHV4-28/IGHV3-<br>15/IGHV1-18/IgLL5                                                                                | 14    |
| BP           | GO:009<br>9024 | plasma<br>membrane<br>invagination                                                | 14/265        | 127/1<br>8670 | 3.54825<br>E-09 | 1.25342<br>E-06 | 1.14478<br>E-06 | IGHE/IGHG2/IGHG4/IGHM/THBS1/IGHV6-1/IGHV5-51/IGHV4-61/IGHV4-59/IGHV4-31/IGHV4-28/IGHV3-<br>15/IGHV1-18/IgLL5                                                                                | 14    |
| BP           | GO:001<br>0324 | membrane<br>invagination                                                          | 14/265        | 135/1<br>8670 | 7.89603<br>E-09 | 2.47935<br>E-06 | 2.26445<br>E-06 | IGHE/IGHG2/IGHG4/IGHM/THBS1/IGHV6-1/IGHV5-51/IGHV4-61/IGHV4-59/IGHV4-31/IGHV4-28/IGHV3-<br>15/IGHV1-18/IgLL5                                                                                | 14    |
| BP           | GO:005<br>0871 | positive<br>regulation of                                                         | 14/265        | 142/1<br>8670 | 1.52006<br>E-08 | 4.29569<br>E-06 | 3.92335<br>E-06 | IGHE/IGHG2/IGHG4/IGHM/IL6/IGHV6-1/IGHV5-51/IGHV4-61/IGHV4-59/IGHV4-31/IGHV4-28/IGHV3-<br>15/IGHV1-18/IgLL5                                                                                  | 14    |

|    |            |                                                                   |        |           |             |             |             |                                                                                                                                                 |    |
|----|------------|-------------------------------------------------------------------|--------|-----------|-------------|-------------|-------------|-------------------------------------------------------------------------------------------------------------------------------------------------|----|
|    |            | B cell activation                                                 |        |           |             |             |             |                                                                                                                                                 |    |
| BP | GO:0019724 | B cell mediated immunity                                          | 17/265 | 221/18670 | 1.86332E-08 | 4.78705E-06 | 4.37213E-06 | CD70/CR1/IGHE/IGHG2/IGHG4/IGHM/IGHV6-1/IGHV5-51/IGHV4-61/IGHV4-59/IGHV4-31/IGHV4-28/IGHV3-15/IGHV1-18/IGKV5-2/IGKV1-39/IGLL5                    | 17 |
| BP | GO:0002449 | lymphocyte mediated immunity                                      | 21/265 | 352/18670 | 3.44632E-08 | 8.11608E-06 | 7.41261E-06 | CD1B/CD70/CR1/IGHE/IGHG2/IGHG4/IGHM/IL6/KLRC2/LEP/IGHV6-1/IGHV5-51/IGHV4-61/IGHV4-59/IGHV4-31/IGHV4-28/IGHV3-15/IGHV1-18/IGKV5-2/IGKV1-39/IGLL5 | 21 |
| BP | GO:0050853 | B cell receptor signaling pathway                                 | 13/265 | 129/18670 | 3.85468E-08 | 8.37948E-06 | 7.65318E-06 | IGHE/IGHG2/IGHG4/IGHM/IGHV6-1/IGHV5-51/IGHV4-61/IGHV4-59/IGHV4-31/IGHV4-28/IGHV3-15/IGHV1-18/IGLL5                                              | 13 |
| BP | GO:0042742 | defense response to bacterium                                     | 20/265 | 330/18670 | 5.70565E-08 | 1.15173E-05 | 1.0519E-05  | IGHE/IGHG2/IGHG4/IGHM/IL6/LBP/KLK7/CCL20/CXCL13/KLK5/IGHV6-1/IGHV5-51/IGHV4-61/IGHV4-59/IGHV4-31/IGHV4-28/IGHV3-15/IGHV1-18/DEFB124/IGLL5       | 20 |
| BP | GO:0008037 | cell recognition                                                  | 16/265 | 215/18670 | 7.81478E-08 | 1.47231E-05 | 1.34469E-05 | EPHB1/FCN1/IGHE/IGHG2/IGHG4/IGHM/IGHV6-1/IGHV5-51/IGHV4-61/IGHV4-59/IGHV4-31/IGHV4-28/IGHV3-15/IGHV1-18/CD209/IGLL5                             | 16 |
| BP | GO:0016064 | immunoglobulin mediated immune response                           | 16/265 | 218/18670 | 9.46761E-08 | 1.67222E-05 | 1.52727E-05 | CR1/IGHE/IGHG2/IGHG4/IGHM/IGHV6-1/IGHV5-51/IGHV4-61/IGHV4-59/IGHV4-31/IGHV4-28/IGHV3-15/IGHV1-18/IGKV5-2/IGKV1-39/IGLL5                         | 16 |
| BP | GO:1990868 | response to chemokine                                             | 11/265 | 97/18670  | 1.29604E-07 | 2.03479E-05 | 1.85842E-05 | CCR8/XCR1/GPR17/REG1A/CCL7/CCL11/CCL13/CCL18/CCL20/CXCL5/CXCL13                                                                                 | 11 |
| BP | GO:1990869 | cellular response to chemokine                                    | 11/265 | 97/18670  | 1.29604E-07 | 2.03479E-05 | 1.85842E-05 | CCR8/XCR1/GPR17/REG1A/CCL7/CCL11/CCL13/CCL18/CCL20/CXCL5/CXCL13                                                                                 | 11 |
| BP | GO:0002460 | adaptive immune response based on somatic recombination of immune | 20/265 | 361/18670 | 2.44409E-07 | 3.63526E-05 | 3.32017E-05 | CD1B/CD70/CR1/IGHE/IGHG2/IGHG4/IGHM/IL6/CXCL13/IGHV6-1/IGHV5-51/IGHV4-61/IGHV4-59/IGHV4-31/IGHV4-28/IGHV3-15/IGHV1-18/IGKV5-2/IGKV1-39/IGLL5    | 20 |

|    |            |                                                         |        |           |             |             |             |                                                                                                                                        |    |
|----|------------|---------------------------------------------------------|--------|-----------|-------------|-------------|-------------|----------------------------------------------------------------------------------------------------------------------------------------|----|
|    |            | receptors built from immunoglobulin superfamily domains |        |           |             |             |             |                                                                                                                                        |    |
| BP | GO:0050864 | regulation of B cell activation                         | 14/265 | 184/18670 | 3.93184E-07 | 5.55569E-05 | 5.07414E-05 | IGHE/IGHG2/IGHG4/IGHM/IL6/IGHV6-1/IGHV5-51/IGHV4-61/IGHV4-59/IGHV4-31/IGHV4-28/IGHV3-15/IGHV1-18/IGLL5                                 | 14 |
| BP | GO:0070098 | chemokine-mediated signaling pathway                    | 10/265 | 88/18670  | 4.78054E-07 | 6.43325E-05 | 5.87564E-05 | CCR8/XCR1/GPR17/CCL7/CCL11/CCL13/CCL18/CCL20/CXCL5/CXCL13                                                                              | 10 |
| BP | GO:0002696 | positive regulation of leukocyte activation             | 20/265 | 380/18670 | 5.50875E-07 | 7.07624E-05 | 6.46289E-05 | CD70/IGHE/IGHG2/IGHG4/IGHM/IL2RA/IL6/LBP/LEP/THBS1/IGHV6-1/IGHV5-51/IGHV4-61/IGHV4-59/IGHV4-31/IGHV4-28/IGHV3-15/IGHV1-18/CD209/IGLL5  | 20 |
| BP | GO:0050867 | positive regulation of cell activation                  | 20/265 | 394/18670 | 9.69011E-07 | 0.000119062 | 0.000108742 | CD70/IGHE/IGHG2/IGHG4/IGHM/IL2RA/IL6/LBP/LEP/THBS1/IGHV6-1/IGHV5-51/IGHV4-61/IGHV4-59/IGHV4-31/IGHV4-28/IGHV3-15/IGHV1-18/CD209/IGLL5  | 20 |
| BP | GO:0051251 | positive regulation of lymphocyte activation            | 18/265 | 334/18670 | 1.47283E-06 | 0.000166921 | 0.000152453 | CD70/IGHE/IGHG2/IGHG4/IGHM/IL2RA/IL6/LEP/IGHV6-1/IGHV5-51/IGHV4-61/IGHV4-59/IGHV4-31/IGHV4-28/IGHV3-15/IGHV1-18/CD209/IGLL5            | 18 |
| BP | GO:0006909 | phagocytosis                                            | 19/265 | 369/18670 | 1.47665E-06 | 0.000166921 | 0.000152453 | FCN1/IGHE/IGHG2/IGHG4/IGHM/LBP/LEP/THBS1/IGHV6-1/IGHV5-51/IGHV4-61/IGHV4-59/IGHV4-31/IGHV4-28/IGHV3-15/IGHV1-18/IGKV5-2/IGKV1-39/IGLL5 | 19 |
| BP | GO:0007210 | serotonin receptor signaling pathway                    | 6/265  | 39/18670  | 1.70161E-05 | 0.00184952  | 0.00168921  | CHRM1/HTR1A/HTR1E/HTR5A/HTR3B/HRH3                                                                                                     | 6  |
| BP | GO:0002920 | regulation of humoral immune response                   | 10/265 | 134/18670 | 2.18156E-05 | 0.002283364 | 0.002085451 | CR1/IGHG2/IGHG4/KLK7/CXCL13/CFHR4/KLK5/IGHV4-59/IGKV5-2/IGKV1-39                                                                       | 10 |

|    |                |                                                                |        |               |                 |                 |                 |                                                                                                                                 |    |
|----|----------------|----------------------------------------------------------------|--------|---------------|-----------------|-----------------|-----------------|---------------------------------------------------------------------------------------------------------------------------------|----|
| BP | GO:009<br>8815 | modulation of<br>excitatory<br>postsynaptic<br>potential       | 6/265  | 41/18<br>670  | 2.29002<br>E-05 | 0.00231<br>1282 | 0.00211<br>0948 | CBLN1/GRIN1/RIMS2/CUX2/CELFB4/NETO1                                                                                             | 6  |
| BP | GO:003<br>1646 | positive<br>regulation of<br>neurological<br>system<br>process | 7/265  | 63/18<br>670  | 3.01113<br>E-05 | 0.00292<br>651  | 0.00267<br>2851 | CCK/GRIN1/CARTPT/RIMS2/CUX2/NETO1/ZNF488                                                                                        | 7  |
| BP | GO:006<br>0078 | regulation of<br>postsynaptic<br>membrane<br>potential         | 10/265 | 140/1<br>8670 | 3.18618<br>E-05 | 0.00292<br>651  | 0.00267<br>2851 | CBLN1/CHRM1/GABRA1/GRIN1/GLRA3/RIMS2/CUX2/CELFB4/SLC17A7/NETO1                                                                  | 10 |
| BP | GO:005<br>0900 | leukocyte<br>migration                                         | 20/265 | 499/1<br>8670 | 3.21026<br>E-05 | 0.00292<br>651  | 0.00267<br>2851 | BDKRB1/COL1A1/COL1A2/IGHM/IL6/LBP/LEP/MMP1/ROR2/CCL7/CCL11/CCL13/CCL18/CCL20/CXCL5/THBS1/CXCL13/IGHV4-59/IGKV5-2/IGKV1-39       | 20 |
| BP | GO:004<br>2113 | B cell<br>activation                                           | 15/265 | 310/1<br>8670 | 3.93781<br>E-05 | 0.00347<br>7575 | 0.00317<br>6151 | CD70/IGHE/IGHG2/IGHG4/IGHM/IL6/IGHV6-1/IGHV5-51/IGHV4-61/IGHV4-59/IGHV4-31/IGHV4-28/IGHV3-15/IGHV1-18/IGLL5                     | 15 |
| BP | GO:001<br>9730 | antimicrobial<br>humoral<br>response                           | 9/265  | 122/1<br>8670 | 6.16155<br>E-05 | 0.00527<br>6526 | 0.00481<br>9176 | IGHM/PI3/KLK7/REG1A/REG1B/CCL13/CXCL5/CXCL13/KLK5                                                                               | 9  |
| BP | GO:007<br>1621 | granulocyte<br>chemotaxis                                      | 9/265  | 123/1<br>8670 | 6.56678<br>E-05 | 0.00545<br>815  | 0.00498<br>5057 | LBP/CCL7/CCL11/CCL13/CCL18/CCL20/CXCL5/THBS1/CXCL13                                                                             | 9  |
| BP | GO:005<br>1249 | regulation of<br>lymphocyte<br>activation                      | 19/265 | 485/1<br>8670 | 6.87007<br>E-05 | 0.00554<br>7088 | 0.00506<br>6287 | CD70/CR1/IGHE/IGHG2/IGHG4/IGHM/IL2RA/IL6/LEP/IGHV6-1/IGHV5-51/IGHV4-61/IGHV4-59/IGHV4-31/IGHV4-28/IGHV3-15/IGHV1-18/CD209/IGLL5 | 19 |
| BP | GO:003<br>0198 | extracellular<br>matrix<br>organization                        | 16/265 | 368/1<br>8670 | 7.82018<br>E-05 | 0.00600<br>4013 | 0.00548<br>3607 | COL1A1/COL1A2/COL5A1/COL6A2/COL6A3/COL12A1/DPT/FAP/IL6/MMP1/KLK7/THBS1/POSTN/KLK5/FERMT1/ADAMTS20                               | 16 |
| BP | GO:006<br>1844 | antimicrobial<br>humoral<br>immune<br>response<br>mediated by  | 7/265  | 73/18<br>670  | 7.86088<br>E-05 | 0.00600<br>4013 | 0.00548<br>3607 | KLK7/REG1A/REG1B/CCL13/CXCL5/CXCL13/KLK5                                                                                        | 7  |

|    |            |                                                                    |        |           |             |             |             |                                                                                                                                    |    |
|----|------------|--------------------------------------------------------------------|--------|-----------|-------------|-------------|-------------|------------------------------------------------------------------------------------------------------------------------------------|----|
|    |            | antimicrobial peptide                                              |        |           |             |             |             |                                                                                                                                    |    |
| BP | GO:0060079 | excitatory postsynaptic potential                                  | 8/265  | 100/18670 | 8.94106E-05 | 0.006575724 | 0.006005764 | CBLN1/GRIN1/GLRA3/RIMS2/CUX2/CELF4/SLC17A7/NETO1                                                                                   | 8  |
| BP | GO:0050890 | cognition                                                          | 14/265 | 296/18670 | 9.07478E-05 | 0.006575724 | 0.006005764 | CCK/CHRM1/DRD5/GLP1R/GRIN1/MME/PTGS2/CCL11/HRH3/CUX2/SLC17A7/PAK5/NETO1/LCE1D                                                      | 14 |
| BP | GO:0098664 | G protein-coupled serotonin receptor signaling pathway             | 5/265  | 34/18670  | 0.000110221 | 0.007787114 | 0.007112155 | CHRM1/HTR1A/HTR1E/HTR5A/HRH3                                                                                                       | 5  |
| BP | GO:0030593 | neutrophil chemotaxis                                              | 8/265  | 104/18670 | 0.000117877 | 0.008124874 | 0.00742064  | LBP/CCL7/CCL11/CCL13/CCL18/CCL20/CXCL5/CXCL13                                                                                      | 8  |
| BP | GO:0032095 | regulation of response to food                                     | 4/265  | 19/18670  | 0.000130015 | 0.008748168 | 0.007989909 | CCK/LEP/NPY/CARTPT                                                                                                                 | 4  |
| BP | GO:0031644 | regulation of neurological system process                          | 9/265  | 137/18670 | 0.000150526 | 0.009636578 | 0.008801314 | CBLN1/CCK/GRIN1/CARTPT/RIMS2/CUX2/CELF4/NETO1/ZNF488                                                                               | 9  |
| BP | GO:0002429 | immune response-activating cell surface receptor signaling pathway | 18/265 | 473/18670 | 0.000153162 | 0.009636578 | 0.008801314 | CR1/FCN1/IGHE/IGHG2/IGHG4/IGHM/IGHV6-1/IGHV5-51/IGHV4-61/IGHV4-59/IGHV4-31/IGHV4-28/IGHV3-15/IGHV1-18/IGKV5-2/IGKV1-39/CD209/IGLL5 | 18 |
| BP | GO:0099565 | chemical synaptic transmission, postsynaptic                       | 8/265  | 108/18670 | 0.000153449 | 0.009636578 | 0.008801314 | CBLN1/GRIN1/GLRA3/RIMS2/CUX2/CELF4/SLC17A7/NETO1                                                                                   | 8  |



|    |                |                                                                                                                         |        |               |                 |                 |                 |                                                                      |    |
|----|----------------|-------------------------------------------------------------------------------------------------------------------------|--------|---------------|-----------------|-----------------|-----------------|----------------------------------------------------------------------|----|
| BP | GO:009<br>7530 | granulocyte<br>migration                                                                                                | 9/265  | 141/1<br>8670 | 0.00018<br>7138 | 0.01149<br>6811 | 0.01050<br>0309 | LBP/CCL7/CCL11/CCL13/CCL18/CCL20/CXCL5/THBS1/CXCL13                  | 9  |
| BP | GO:009<br>7529 | myeloid<br>leukocyte<br>migration                                                                                       | 11/265 | 210/1<br>8670 | 0.00021<br>4246 | 0.01288<br>2124 | 0.01176<br>5549 | IL6/LBP/ROR2/CCL7/CCL11/CCL13/CCL18/CCL20/CXCL5/THBS1/CXCL13         | 11 |
| BP | GO:000<br>8217 | regulation of<br>blood<br>pressure                                                                                      | 10/265 | 182/1<br>8670 | 0.00028<br>2341 | 0.01584<br>5711 | 0.01447<br>2263 | BDKRB1/COL1A2/DRD5/GLP1R/LEP/MME/NPY/PTGS2/CARTPT/POSTN              | 10 |
| BP | GO:199<br>0266 | neutrophil<br>migration                                                                                                 | 8/265  | 118/1<br>8670 | 0.00028<br>238  | 0.01584<br>5711 | 0.01447<br>2263 | LBP/CCL7/CCL11/CCL13/CCL18/CCL20/CXCL5/CXCL13                        | 8  |
| BP | GO:003<br>2098 | regulation of<br>appetite                                                                                               | 4/265  | 23/18<br>670  | 0.00028<br>4053 | 0.01584<br>5711 | 0.01447<br>2263 | CCK/LEP/NPY/CARTPT                                                   | 4  |
| BP | GO:004<br>8247 | lymphocyte<br>chemotaxis                                                                                                | 6/265  | 64/18<br>670  | 0.00029<br>0786 | 0.01584<br>5711 | 0.01447<br>2263 | CCL7/CCL11/CCL13/CCL18/CCL20/CXCL13                                  | 6  |
| BP | GO:007<br>1674 | mononuclear<br>cell migration                                                                                           | 7/265  | 90/18<br>670  | 0.00029<br>3838 | 0.01584<br>5711 | 0.01447<br>2263 | IL6/CCL7/CCL11/CCL13/CCL18/CCL20/THBS1                               | 7  |
| BP | GO:000<br>7187 | G protein-<br>coupled<br>receptor<br>signaling<br>pathway,<br>coupled to<br>cyclic<br>nucleotide<br>second<br>messenger | 12/265 | 256/1<br>8670 | 0.00031<br>1395 | 0.01584<br>5711 | 0.01447<br>2263 | CHRM1/DRD5/GLP1R/XCR1/HTR1A/HTR1E/HTR5A/NPY/SSTR1/HRH3/ADGRE3/ADGRG7 | 12 |
| BP | GO:000<br>8343 | adult feeding<br>behavior                                                                                               | 3/265  | 10/18<br>670  | 0.00031<br>515  | 0.01584<br>5711 | 0.01447<br>2263 | LEP/NPY/CARTPT                                                       | 3  |
| BP | GO:007<br>0091 | glucagon<br>secretion                                                                                                   | 3/265  | 10/18<br>670  | 0.00031<br>515  | 0.01584<br>5711 | 0.01447<br>2263 | IL6/LEP/CARTPT                                                       | 3  |
| BP | GO:000<br>2548 | monocyte<br>chemotaxis                                                                                                  | 6/265  | 65/18<br>670  | 0.00031<br>6596 | 0.01584<br>5711 | 0.01447<br>2263 | IL6/CCL7/CCL11/CCL13/CCL18/CCL20                                     | 6  |

|    |                |                                                           |        |               |                 |                 |                 |                                                                                                       |    |
|----|----------------|-----------------------------------------------------------|--------|---------------|-----------------|-----------------|-----------------|-------------------------------------------------------------------------------------------------------|----|
| BP | GO:000<br>2526 | acute<br>inflammatory<br>response                         | 11/265 | 220/1<br>8670 | 0.00031<br>9606 | 0.01584<br>5711 | 0.01447<br>2263 | CR1/IGHG2/IGHG4/IL6/LBP/ORM1/PTGS2/CFHR4/IGHV4-59/IGKV5-2/IGKV1-39                                    | 11 |
| BP | GO:004<br>3062 | extracellular<br>structure<br>organization                | 16/265 | 422/1<br>8670 | 0.00036<br>9663 | 0.01801<br>1498 | 0.01645<br>0327 | COL1A1/COL1A2/COL5A1/COL6A2/COL6A3/COL12A1/DPT/FAP/IL6/MMP1/KLK7/THBS1/POSTN/KLK5/F<br>ERMT1/ADAMTS20 | 16 |
| BP | GO:003<br>2104 | regulation of<br>response to<br>extracellular<br>stimulus | 4/265  | 25/18<br>670  | 0.00039<br>6839 | 0.01869<br>1098 | 0.01707<br>1022 | CCK/LEP/NPY/CARTPT                                                                                    | 4  |
| BP | GO:003<br>2107 | regulation of<br>response to<br>nutrient levels           | 4/265  | 25/18<br>670  | 0.00039<br>6839 | 0.01869<br>1098 | 0.01707<br>1022 | CCK/LEP/NPY/CARTPT                                                                                    | 4  |
| BP | GO:006<br>0326 | cell<br>chemotaxis                                        | 13/265 | 304/1<br>8670 | 0.00042<br>7194 | 0.01979<br>0967 | 0.01807<br>5558 | CCR8/EPHB1/XCR1/IL6/LBP/CCL7/CCL11/CCL13/CCL18/CCL20/CXCL5/THBS1/CXCL13                               | 13 |
| BP | GO:000<br>2673 | regulation of<br>acute<br>inflammatory<br>response        | 9/265  | 159/1<br>8670 | 0.00045<br>6084 | 0.02078<br>8607 | 0.01898<br>6727 | CR1/IGHG2/IGHG4/IL6/PTGS2/CFHR4/IGHV4-59/IGKV5-2/IGKV1-39                                             | 9  |
| BP | GO:000<br>0353 | formation of<br>quadruple<br>SL/U4/U5/U6<br>snRNP         | 3/265  | 12/18<br>670  | 0.00056<br>5736 | 0.02459<br>6457 | 0.02246<br>4526 | RNU5B-1/RNU4-2/RNU4-1                                                                                 | 3  |
| BP | GO:000<br>0365 | mRNA trans<br>splicing, via<br>spliceosome                | 3/265  | 12/18<br>670  | 0.00056<br>5736 | 0.02459<br>6457 | 0.02246<br>4526 | RNU5B-1/RNU4-2/RNU4-1                                                                                 | 3  |
| BP | GO:004<br>5291 | mRNA trans<br>splicing, SL<br>addition                    | 3/265  | 12/18<br>670  | 0.00056<br>5736 | 0.02459<br>6457 | 0.02246<br>4526 | RNU5B-1/RNU4-2/RNU4-1                                                                                 | 3  |
| BP | GO:005<br>0954 | sensory<br>perception of<br>mechanical<br>stimulus        | 9/265  | 165/1<br>8670 | 0.00059<br>6564 | 0.02544<br>2321 | 0.02323<br>7073 | COL1A1/CRYM/EPYC/ATP6V0A4/OTOR/PCDH15/SRRM4/OTOS/DRGX                                                 | 9  |

|    |                |                                                                      |        |               |                 |                 |                 |                                                                                                    |    |
|----|----------------|----------------------------------------------------------------------|--------|---------------|-----------------|-----------------|-----------------|----------------------------------------------------------------------------------------------------|----|
| BP | GO:005<br>0851 | antigen<br>receptor-<br>mediated<br>signaling<br>pathway             | 13/265 | 316/1<br>8670 | 0.00061<br>4417 | 0.02544<br>2321 | 0.02323<br>7073 | IGHE/IGHG2/IGHG4/IGHM/IGHV6-1/IGHV5-51/IGHV4-61/IGHV4-59/IGHV4-31/IGHV4-28/IGHV3-15/IGHV1-18/IGLL5 | 13 |
| BP | GO:190<br>3792 | negative<br>regulation of<br>anion<br>transport                      | 4/265  | 28/18<br>670  | 0.00062<br>1203 | 0.02544<br>2321 | 0.02323<br>7073 | LEP/PRKG2/THBS1/HRH3                                                                               | 4  |
| BP | GO:200<br>0463 | positive<br>regulation of<br>excitatory<br>postsynaptic<br>potential | 4/265  | 28/18<br>670  | 0.00062<br>1203 | 0.02544<br>2321 | 0.02323<br>7073 | GRIN1/RIMS2/CUX2/NETO1                                                                             | 4  |
| BP | GO:005<br>0806 | positive<br>regulation of<br>synaptic<br>transmission                | 9/265  | 168/1<br>8670 | 0.00067<br>906  | 0.02741<br>4639 | 0.02503<br>8438 | GRIN1/KISS1/MME/ROR2/PTGS2/RIMS2/CACNG3/CUX2/NETO1                                                 | 9  |
| BP | GO:003<br>2096 | negative<br>regulation of<br>response to<br>food                     | 3/265  | 13/18<br>670  | 0.00072<br>7762 | 0.02817<br>3353 | 0.02573<br>139  | CCK/LEP/CARTPT                                                                                     | 3  |
| BP | GO:003<br>2099 | negative<br>regulation of<br>appetite                                | 3/265  | 13/18<br>670  | 0.00072<br>7762 | 0.02817<br>3353 | 0.02573<br>139  | CCK/LEP/CARTPT                                                                                     | 3  |
| BP | GO:007<br>0208 | protein<br>heterotrimeriz<br>ation                                   | 3/265  | 13/18<br>670  | 0.00072<br>7762 | 0.02817<br>3353 | 0.02573<br>139  | COL1A1/COL1A2/COL6A2                                                                               | 3  |
| BP | GO:005<br>1917 | regulation of<br>fibrinolysis                                        | 3/265  | 14/18<br>670  | 0.00091<br>6558 | 0.03500<br>2602 | 0.03196<br>8704 | APOH/FAP/THBS1                                                                                     | 3  |
| BP | GO:003<br>0199 | collagen fibril<br>organization                                      | 5/265  | 54/18<br>670  | 0.00099<br>4579 | 0.03747<br>5734 | 0.03422<br>7474 | COL1A1/COL1A2/COL5A1/COL12A1/DPT                                                                   | 5  |

|    |                |                                                                       |        |               |                 |                 |                 |                                                                                                  |    |
|----|----------------|-----------------------------------------------------------------------|--------|---------------|-----------------|-----------------|-----------------|--------------------------------------------------------------------------------------------------|----|
| BP | GO:007<br>1295 | cellular<br>response to<br>vitamin                                    | 4/265  | 32/18<br>670  | 0.00104<br>354  | 0.03880<br>3228 | 0.03543<br>9905 | COL1A1/LEP/VDR/POSTN                                                                             | 4  |
| BP | GO:000<br>7605 | sensory<br>perception of<br>sound                                     | 8/265  | 145/1<br>8670 | 0.00110<br>8097 | 0.04004<br>8895 | 0.03657<br>7603 | COL1A1/CRYM/EPYC/ATP6V0A4/OTOR/PCDH15/SRRM4/OTOS                                                 | 8  |
| BP | GO:000<br>7611 | learning or<br>memory                                                 | 11/265 | 256/1<br>8670 | 0.00112<br>3968 | 0.04004<br>8895 | 0.03657<br>7603 | CCK/DRD5/GLP1R/GRIN1/MME/PTGS2/CCL11/CUX2/SLC17A7/PAK5/NETO1                                     | 11 |
| BP | GO:003<br>2105 | negative<br>regulation of<br>response to<br>extracellular<br>stimulus | 3/265  | 15/18<br>670  | 0.00113<br>3727 | 0.04004<br>8895 | 0.03657<br>7603 | CCK/LEP/CARTPT                                                                                   | 3  |
| BP | GO:003<br>2108 | negative<br>regulation of<br>response to<br>nutrient levels           | 3/265  | 15/18<br>670  | 0.00113<br>3727 | 0.04004<br>8895 | 0.03657<br>7603 | CCK/LEP/CARTPT                                                                                   | 3  |
| BP | GO:004<br>8488 | synaptic<br>vesicle<br>endocytosis                                    | 5/265  | 56/18<br>670  | 0.00117<br>3992 | 0.04045<br>9788 | 0.03695<br>2881 | SH3GL2/SNCB/SNAP91/PACSIN1/SLC17A7                                                               | 5  |
| BP | GO:014<br>0238 | presynaptic<br>endocytosis                                            | 5/265  | 56/18<br>670  | 0.00117<br>3992 | 0.04045<br>9788 | 0.03695<br>2881 | SH3GL2/SNCB/SNAP91/PACSIN1/SLC17A7                                                               | 5  |
| BP | GO:005<br>5074 | calcium ion<br>homeostasis                                            | 16/265 | 471/1<br>8670 | 0.00119<br>3032 | 0.04062<br>0593 | 0.03709<br>9748 | ATP2B3/BDKRB1/CCR8/DRD5/GLP1R/XCR1/GPR17/GRIN1/KCNA5/KISS1/REG1A/CCL7/CCL11/CCL13/<br>VDR/CXCL13 | 16 |
| BP | GO:003<br>0449 | regulation of<br>complement<br>activation                             | 7/265  | 115/1<br>8670 | 0.00127<br>741  | 0.04297<br>5723 | 0.03925<br>0744 | CR1/IGHG2/IGHG4/CFHR4/IGHV4-59/IGKV5-2/IGKV1-39                                                  | 7  |
| BP | GO:004<br>8665 | neuron fate<br>specification                                          | 4/265  | 34/18<br>670  | 0.00131<br>6244 | 0.04376<br>124  | 0.03996<br>8175 | MYT1L/TLX3/FEV/ESRP1                                                                             | 4  |
| BP | GO:200<br>0257 | regulation of<br>protein<br>activation<br>cascade                     | 7/265  | 116/1<br>8670 | 0.00134<br>3309 | 0.04414<br>1762 | 0.04031<br>5715 | CR1/IGHG2/IGHG4/CFHR4/IGHV4-59/IGKV5-2/IGKV1-39                                                  | 7  |

|    |                |                                                                                         |        |               |                 |                 |                 |                                                                                        |    |
|----|----------------|-----------------------------------------------------------------------------------------|--------|---------------|-----------------|-----------------|-----------------|----------------------------------------------------------------------------------------|----|
| BP | GO:003<br>0595 | leukocyte<br>chemotaxis                                                                 | 10/265 | 224/1<br>8670 | 0.00140<br>8612 | 0.04533<br>92   | 0.04140<br>9363 | IL6/LBP/CCL7/CCL11/CCL13/CCL18/CCL20/CXCL5/THBS1/CXCL13                                | 10 |
| BP | GO:000<br>7613 | memory                                                                                  | 7/265  | 117/1<br>8670 | 0.00141<br>1836 | 0.04533<br>92   | 0.04140<br>9363 | CCK/GRIN1/PTGS2/CUX2/SLC17A7/PAK5/NETO1                                                | 7  |
| BP | GO:005<br>0804 | modulation of<br>chemical<br>synaptic<br>transmission                                   | 15/265 | 436/1<br>8670 | 0.00149<br>0073 | 0.04731<br>4017 | 0.04321<br>301  | CBLN1/DRD5/EPHB1/GRIN1/KISS1/MME/ROR2/PTGS2/RIMS2/CACNG3/CUX2/MCTP2/CELF4/NETO1/UNC13C | 15 |
| BP | GO:009<br>9177 | regulation of<br>trans-synaptic<br>signaling                                            | 15/265 | 437/1<br>8670 | 0.00152<br>3823 | 0.04784<br>8033 | 0.04370<br>074  | CBLN1/DRD5/EPHB1/GRIN1/KISS1/MME/ROR2/PTGS2/RIMS2/CACNG3/CUX2/MCTP2/CELF4/NETO1/UNC13C | 15 |
| BP | GO:001<br>8149 | peptide cross-<br>linking                                                               | 5/265  | 60/18<br>670  | 0.00160<br>3199 | 0.04978<br>7243 | 0.04547<br>1867 | F13A1/IVL/PI3/THBS1/LCE1D                                                              | 5  |
| BP | GO:000<br>3414 | chondrocyte<br>morphogenesis<br>is involved in<br>endochondral<br>bone<br>morphogenesis | 3/265  | 18/18<br>670  | 0.00197<br>0251 | 0.05923<br>3293 | 0.05409<br>9167 | COL6A2/COL6A3/COL12A1                                                                  | 3  |
| BP | GO:000<br>3429 | growth plate<br>cartilage<br>chondrocyte<br>morphogenesis                               | 3/265  | 18/18<br>670  | 0.00197<br>0251 | 0.05923<br>3293 | 0.05409<br>9167 | COL6A2/COL6A3/COL12A1                                                                  | 3  |
| BP | GO:009<br>0171 | chondrocyte<br>morphogenesis                                                            | 3/265  | 18/18<br>670  | 0.00197<br>0251 | 0.05923<br>3293 | 0.05409<br>9167 | COL6A2/COL6A3/COL12A1                                                                  | 3  |
| BP | GO:003<br>2094 | response to<br>food                                                                     | 4/265  | 38/18<br>670  | 0.00200<br>4112 | 0.05961<br>7073 | 0.05444<br>9682 | CCK/LEP/NPY/CARTPT                                                                     | 4  |
| BP | GO:003<br>5249 | synaptic<br>transmission,<br>glutamatergic                                              | 6/265  | 93/18<br>670  | 0.00210<br>1519 | 0.06186<br>3451 | 0.05650<br>1353 | GRIN1/ROR2/PTGS2/CACNG3/SLC17A7/UNC13C                                                 | 6  |

|    |                |                                                     |        |               |                 |                 |                 |                                                                                        |    |
|----|----------------|-----------------------------------------------------|--------|---------------|-----------------|-----------------|-----------------|----------------------------------------------------------------------------------------|----|
| BP | GO:000<br>2544 | chronic<br>inflammatory<br>response                 | 3/265  | 19/18<br>670  | 0.00231<br>5295 | 0.06603<br>7322 | 0.06031<br>3448 | CCL11/THBS1/CXCL13                                                                     | 3  |
| BP | GO:000<br>3422 | growth plate<br>cartilage<br>morphogenes<br>is      | 3/265  | 19/18<br>670  | 0.00231<br>5295 | 0.06603<br>7322 | 0.06031<br>3448 | COL6A2/COL6A3/COL12A1                                                                  | 3  |
| BP | GO:002<br>1533 | cell<br>differentiation<br>in hindbrain             | 3/265  | 19/18<br>670  | 0.00231<br>5295 | 0.06603<br>7322 | 0.06031<br>3448 | CBLN1/LHX1/LHX5                                                                        | 3  |
| BP | GO:005<br>1952 | regulation of<br>amine<br>transport                 | 6/265  | 95/18<br>670  | 0.00234<br>0622 | 0.06603<br>7322 | 0.06031<br>3448 | CCK/LEP/CARTPT/HRH3/SYT13/SYT10                                                        | 6  |
| BP | GO:000<br>2687 | positive<br>regulation of<br>leukocyte<br>migration | 7/265  | 128/1<br>8670 | 0.00236<br>0145 | 0.06603<br>7322 | 0.06031<br>3448 | BDKRB1/IL6/LBP/CCL7/CCL20/THBS1/CXCL13                                                 | 7  |
| BP | GO:000<br>6874 | cellular<br>calcium ion<br>homeostasis              | 15/265 | 458/1<br>8670 | 0.00239<br>5323 | 0.06636<br>4529 | 0.06061<br>2294 | ATP2B3/BDKRB1/CCR8/DRD5/GLP1R/XCR1/GPR17/GRIN1/KCNA5/KISS1/CCL7/CCL11/CCL13/VDR/CXCL13 | 15 |
| BP | GO:000<br>6835 | dicarboxylic<br>acid transport                      | 6/265  | 96/18<br>670  | 0.00246<br>7583 | 0.06770<br>2799 | 0.06183<br>4567 | CCK/SLC22A6/HRH3/SLC17A7/LRRC8E/SLC25A21                                               | 6  |
| BP | GO:005<br>1965 | positive<br>regulation of<br>synapse<br>assembly    | 5/265  | 68/18<br>670  | 0.00279<br>1905 | 0.07586<br>4642 | 0.06928<br>8972 | CBLN1/EPHB1/CUX2/CBLN2/LRTM2                                                           | 5  |
| BP | GO:003<br>6465 | synaptic<br>vesicle<br>recycling                    | 5/265  | 69/18<br>670  | 0.00297<br>5781 | 0.07995<br>134  | 0.07302<br>145  | SH3GL2/SNCB/SNAP91/PACSIN1/SLC17A7                                                     | 5  |
| BP | GO:002<br>1697 | cerebellar<br>cortex<br>formation                   | 3/265  | 21/18<br>670  | 0.00311<br>2048 | 0.07995<br>134  | 0.07302<br>145  | CBLN1/LHX1/LHX5                                                                        | 3  |

|    |                |                                                                                    |       |               |                 |                 |                 |                                                |   |
|----|----------------|------------------------------------------------------------------------------------|-------|---------------|-----------------|-----------------|-----------------|------------------------------------------------|---|
| BP | GO:003<br>0728 | ovulation                                                                          | 3/265 | 21/18<br>670  | 0.00311<br>2048 | 0.07995<br>134  | 0.07302<br>145  | EREG/LEP/PTGS2                                 | 3 |
| BP | GO:003<br>2891 | negative<br>regulation of<br>organic acid<br>transport                             | 3/265 | 21/18<br>670  | 0.00311<br>2048 | 0.07995<br>134  | 0.07302<br>145  | LEP/THBS1/HRH3                                 | 3 |
| BP | GO:004<br>8245 | eosinophil<br>chemotaxis                                                           | 3/265 | 21/18<br>670  | 0.00311<br>2048 | 0.07995<br>134  | 0.07302<br>145  | CCL7/CCL11/CCL13                               | 3 |
| BP | GO:005<br>5093 | response to<br>hyperoxia                                                           | 3/265 | 21/18<br>670  | 0.00311<br>2048 | 0.07995<br>134  | 0.07302<br>145  | CDK4/COL1A1/KCNA5                              | 3 |
| BP | GO:001<br>5837 | amine<br>transport                                                                 | 6/265 | 102/1<br>8670 | 0.00334<br>111  | 0.08426<br>7765 | 0.07696<br>3743 | CCK/LEP/CARTPT/HRH3/SYT13/SYT10                | 6 |
| BP | GO:200<br>0379 | positive<br>regulation of<br>reactive<br>oxygen<br>species<br>metabolic<br>process | 6/265 | 102/1<br>8670 | 0.00334<br>111  | 0.08426<br>7765 | 0.07696<br>3743 | GRIN1/LEP/PTGS2/THBS1/XDH/AGXT2                | 6 |
| BP | GO:004<br>2531 | positive<br>regulation of<br>tyrosine<br>phosphorylati<br>on of STAT<br>protein    | 5/265 | 71/18<br>670  | 0.00336<br>9518 | 0.08426<br>7765 | 0.07696<br>3743 | CSF2/IL6/LEP/IL20/IL31RA                       | 5 |
| BP | GO:002<br>1516 | dorsal spinal<br>cord<br>development                                               | 3/265 | 22/18<br>670  | 0.00356<br>5958 | 0.08839<br>8216 | 0.08073<br>6181 | LHX1/LHX5/DRGX                                 | 3 |
| BP | GO:001<br>9233 | sensory<br>perception of<br>pain                                                   | 6/265 | 104/1<br>8670 | 0.00367<br>7967 | 0.09038<br>2052 | 0.08254<br>8065 | BDKRB1/CCK/EPHB1/GRIN1/MME/PTGS2               | 6 |
| BP | GO:000<br>7416 | synapse<br>assembly                                                                | 8/265 | 177/1<br>8670 | 0.00385<br>0162 | 0.09379<br>7919 | 0.08566<br>7858 | CBLN1/CDH9/EPHB1/GABRA1/GRIN1/CUX2/CBLN2/LRTM2 | 8 |

|    |                |                                                    |        |               |                 |                 |                 |                                                                                                                                                 |    |
|----|----------------|----------------------------------------------------|--------|---------------|-----------------|-----------------|-----------------|-------------------------------------------------------------------------------------------------------------------------------------------------|----|
| BP | GO:003<br>1670 | cellular<br>response to<br>nutrient                | 5/265  | 74/18<br>670  | 0.00402<br>8441 | 0.09674<br>0429 | 0.08835<br>5321 | COL1A1/LEP/PTGS2//DR/POSTN                                                                                                                      | 5  |
| BP | GO:005<br>1963 | regulation of<br>synapse<br>assembly               | 6/265  | 106/1<br>8670 | 0.00403<br>9409 | 0.09674<br>0429 | 0.08835<br>5321 | CBLN1/EPHB1/GRIN1/CUX2/CBLN2/LRTM2                                                                                                              | 6  |
| BP | GO:005<br>0727 | regulation of<br>inflammatory<br>response          | 15/265 | 485/1<br>8670 | 0.00408<br>7931 | 0.09707<br>9784 | 0.08866<br>5263 | CR1/GPR17/IGHG2/IGHG4/IL2RA/IL6/LBP/LEP/PTGS2/CCL18/CFHR4/IGHV4-59/IGKV5-2/IGKV1-39/IL20                                                        | 15 |
| CC | GO:004<br>2571 | immunoglobul<br>in complex,<br>circulating         | 13/280 | 72/19<br>717  | 2.4291E<br>-11  | 7.60309<br>E-09 | 6.82705<br>E-09 | IGHE/IGHG2/IGHG4/IGHM/IGHV6-1/IGHV5-51/IGHV4-61/IGHV4-59/IGHV4-31/IGHV4-28/IGHV3-15/IGHV1-18/IGLL5                                              | 13 |
| CC | GO:001<br>9814 | immunoglobul<br>in complex                         | 17/280 | 159/1<br>9717 | 1.20779<br>E-10 | 1.89019<br>E-08 | 1.69726<br>E-08 | IGHE/IGHG2/IGHG4/IGHM/IGHV6-1/IGHV5-51/IGHV4-61/IGHV4-59/IGHV4-31/IGHV4-28/IGHV3-15/IGHV1-18/IGKV1D-17/IGKV5-2/IGKV1-39/IGKV1-9/IGLL5           | 17 |
| CC | GO:000<br>9897 | external side<br>of plasma<br>membrane             | 21/280 | 393/1<br>9717 | 2.28794<br>E-07 | 2.38708<br>E-05 | 2.14343<br>E-05 | CD1B/CCR8/FCN1/XCR1/IGHE/IGHG2/IGHG4/IGHM/IL2RA/THBS1/IGHV6-1/IGHV5-51/IGHV4-61/IGHV4-59/IGHV4-31/IGHV4-28/IGHV3-15/IGHV1-18/CD209/IL31RA/IGLL5 | 21 |
| CC | GO:006<br>2023 | collagen-<br>containing<br>extracellular<br>matrix | 20/280 | 406/1<br>9717 | 1.58449<br>E-06 | 0.00012<br>3986 | 0.00011<br>1331 | APOH/CBLN1/COL1A1/COL1A2/COL5A1/COL6A2/COL6A3/COL12A1/DPT/F13A1/FCN1/ORM1/PCOLCE/RBP3/THBS1/POSTN/ADAMTS20/LRRC15/FREM3/COL6A5                  | 20 |
| CC | GO:000<br>5581 | collagen<br>trimer                                 | 9/280  | 87/19<br>717  | 4.02597<br>E-06 | 0.00025<br>2026 | 0.00022<br>6302 | COL1A1/COL1A2/COL5A1/COL6A2/COL6A3/COL12A1/FCN1/COL6A5/C1QTNF8                                                                                  | 9  |
| CC | GO:006<br>0076 | excitatory<br>synapse                              | 7/280  | 50/19<br>717  | 6.40316<br>E-06 | 0.00033<br>4032 | 0.00029<br>9938 | CBLN1/GRIN1/KCNJ9/CACNG3/SLC17A7/NETO1/UNC13C                                                                                                   | 7  |
| CC | GO:009<br>8793 | presynapse                                         | 20/280 | 491/1<br>9717 | 2.61961<br>E-05 | 0.00117<br>1339 | 0.00105<br>1783 | ATP2B3/CCK/CDH9/CHRM1/GRIN1/KCNJ9/MME/SH3GL2/SNCB/RIMS2/SNAP91/HRH3/PACSIN1/MCTP2/SLC17A7/KCTD16/SYNPR/IL31RA/SYT10/UNC13C                      | 20 |
| CC | GO:000<br>5583 | fibrillar<br>collagen<br>trimer                    | 3/280  | 11/19<br>717  | 0.00042<br>9649 | 0.01494<br>2244 | 0.01341<br>7115 | COL1A1/COL1A2/COL5A1                                                                                                                            | 3  |
| CC | GO:009<br>8643 | banded<br>collagen fibril                          | 3/280  | 11/19<br>717  | 0.00042<br>9649 | 0.01494<br>2244 | 0.01341<br>7115 | COL1A1/COL1A2/COL5A1                                                                                                                            | 3  |



|    |                |                                                                         |        |               |                 |                 |                 |                                                                                                          |    |
|----|----------------|-------------------------------------------------------------------------|--------|---------------|-----------------|-----------------|-----------------|----------------------------------------------------------------------------------------------------------|----|
| CC | GO:009<br>7060 | synaptic<br>membrane                                                    | 16/280 | 432/1<br>9717 | 0.00048<br>4746 | 0.01517<br>2562 | 0.01362<br>3925 | CBLN1/CDH9/CHRM1/GABRA1/GRIN1/HTR5A/KCNJ9/GLRA3/HTR3B/RIMS2/SNAP91/CACNG3/KCTD16/<br>NETO1/IL31RA/UNC13C | 16 |
| CC | GO:009<br>9060 | integral<br>component of<br>postsynaptic<br>specialization<br>membrane  | 6/280  | 74/19<br>717  | 0.00064<br>1538 | 0.01771<br>8612 | 0.01591<br>0104 | CHRM1/GABRA1/GRIN1/HTR5A/CACNG3/NETO1                                                                    | 6  |
| CC | GO:004<br>4420 | extracellular<br>matrix<br>component                                    | 5/280  | 51/19<br>717  | 0.00076<br>7551 | 0.01771<br>8612 | 0.01591<br>0104 | COL1A1/COL1A2/COL5A1/COL12A1/RBP3                                                                        | 5  |
| CC | GO:007<br>0382 | exocytic<br>vesicle                                                     | 10/280 | 207/1<br>9717 | 0.00078<br>1802 | 0.01771<br>8612 | 0.01591<br>0104 | GRIN1/MME/SH3GL2/SNAP91/MCTP2/SLC17A7/SYT13/SYNPR/SYT10/UNC13C                                           | 10 |
| CC | GO:009<br>8948 | intrinsic<br>component of<br>postsynaptic<br>specialization<br>membrane | 6/280  | 77/19<br>717  | 0.00079<br>2526 | 0.01771<br>8612 | 0.01591<br>0104 | CHRM1/GABRA1/GRIN1/HTR5A/CACNG3/NETO1                                                                    | 6  |
| CC | GO:009<br>8688 | parallel fiber<br>to Purkinje<br>cell synapse                           | 3/280  | 16/19<br>717  | 0.00138<br>3471 | 0.02776<br>1552 | 0.02492<br>7978 | CBLN1/KCNJ9/UNC13C                                                                                       | 3  |
| CC | GO:009<br>9055 | integral<br>component of<br>postsynaptic<br>membrane                    | 7/280  | 117/1<br>9717 | 0.00141<br>9431 | 0.02776<br>1552 | 0.02492<br>7978 | CDH9/CHRM1/GABRA1/GRIN1/HTR5A/CACNG3/NETO1                                                               | 7  |
| CC | GO:009<br>9699 | integral<br>component of<br>synaptic<br>membrane                        | 8/280  | 152/1<br>9717 | 0.00150<br>7816 | 0.02776<br>1552 | 0.02492<br>7978 | CDH9/CHRM1/GABRA1/GRIN1/HTR5A/KCNJ9/CACNG3/NETO1                                                         | 8  |
| CC | GO:004<br>2599 | lamellar body                                                           | 3/280  | 17/19<br>717  | 0.00166<br>2382 | 0.02890<br>6979 | 0.02595<br>6494 | KLK7/SFTPC/KLK5                                                                                          | 3  |
| CC | GO:009<br>8936 | intrinsic<br>component of                                               | 7/280  | 122/1<br>9717 | 0.00180<br>5918 | 0.02975<br>0131 | 0.02671<br>3586 | CDH9/CHRM1/GABRA1/GRIN1/HTR5A/CACNG3/NETO1                                                               | 7  |

|    |            |                                                      |        |           |             |             |             |                                                                     |    |
|----|------------|------------------------------------------------------|--------|-----------|-------------|-------------|-------------|---------------------------------------------------------------------|----|
|    |            | postsynaptic membrane                                |        |           |             |             |             |                                                                     |    |
| CC | GO:0042734 | presynaptic membrane                                 | 8/280  | 161/19717 | 0.00216557  | 0.033891166 | 0.030431953 | CDH9/CHRM1/KCNJ9/RIMS2/SNAP91/KCTD16/IL31RA/UNC13C                  | 8  |
| CC | GO:0098644 | complex of collagen trimers                          | 3/280  | 19/19717  | 0.002319718 | 0.034556378 | 0.031029268 | COL1A1/COL1A2/COL5A1                                                | 3  |
| CC | GO:0099240 | intrinsic component of synaptic membrane             | 8/280  | 164/19717 | 0.002428883 | 0.034556378 | 0.031029268 | CDH9/CHRM1/GABRA1/GRIN1/HTR5A/KCNJ9/CACNG3/NETO1                    | 8  |
| CC | GO:0099634 | postsynaptic specialization membrane                 | 6/280  | 101/19717 | 0.003195022 | 0.043480082 | 0.039042145 | CHRM1/GABRA1/GRIN1/HTR5A/CACNG3/NETO1                               | 6  |
| CC | GO:0044306 | neuron projection terminus                           | 7/280  | 138/19717 | 0.003609543 | 0.047074462 | 0.042269653 | CCK/CHRM1/GRIN1/MME/PACSIN1/ATCAY/UNC13C                            | 7  |
| CC | GO:0099061 | integral component of postsynaptic density membrane  | 4/280  | 50/19717  | 0.005490432 | 0.068740205 | 0.061724011 | CHRM1/GRIN1/CACNG3/NETO1                                            | 4  |
| CC | GO:0008021 | synaptic vesicle                                     | 8/280  | 191/19717 | 0.006088113 | 0.073291514 | 0.065810776 | GRIN1/MME/SH3GL2/SNAP91/MCTP2/SLC17A7/SYNPR/UNC13C                  | 8  |
| CC | GO:0045211 | postsynaptic membrane                                | 11/280 | 323/19717 | 0.00669893  | 0.075500497 | 0.067794292 | CBLN1/CDH9/CHRM1/GABRA1/GRIN1/HTR5A/GLRA3/HTR3B/CACNG3/KCTD16/NETO1 | 11 |
| CC | GO:0099146 | intrinsic component of postsynaptic density membrane | 4/280  | 53/19717  | 0.006754038 | 0.075500497 | 0.067794292 | CHRM1/GRIN1/CACNG3/NETO1                                            | 4  |
| CC | GO:0097470 | ribbon synapse                                       | 2/280  | 10/19717  | 0.008387501 | 0.090527164 | 0.081287213 | SH3GL2/PACSIN1                                                      | 2  |

|    |            |                                                                         |        |           |             |             |             |                                                                                                                                      |    |
|----|------------|-------------------------------------------------------------------------|--------|-----------|-------------|-------------|-------------|--------------------------------------------------------------------------------------------------------------------------------------|----|
| MF | GO:0003823 | antigen binding                                                         | 18/245 | 160/17697 | 8.901E-12   | 3.96985E-09 | 3.45734E-09 | CD1B/IGHE/IGHG2/IGHG4/IGHM/KLRC2/IGHV6-1/IGHV5-51/IGHV4-61/IGHV4-59/IGHV4-31/IGHV4-28/IGHV3-15/IGHV1-18/IGKV5-2/IGKV1-39/CD209/IGLL5 | 18 |
| MF | GO:0034987 | immunoglobulin receptor binding                                         | 13/245 | 76/17697  | 3.51872E-11 | 7.84674E-09 | 6.83372E-09 | IGHE/IGHG2/IGHG4/IGHM/IGHV6-1/IGHV5-51/IGHV4-61/IGHV4-59/IGHV4-31/IGHV4-28/IGHV3-15/IGHV1-18/IGLL5                                   | 13 |
| MF | GO:0030020 | extracellular matrix structural constituent conferring tensile strength | 7/245  | 41/17697  | 1.34652E-06 | 0.000200183 | 0.000174339 | COL1A1/COL1A2/COL5A1/COL6A2/COL6A3/COL12A1/COL6A5                                                                                    | 7  |
| MF | GO:0008009 | chemokine activity                                                      | 7/245  | 49/17697  | 4.68231E-06 | 0.000468467 | 0.000407988 | CCL7/CCL11/CCL13/CCL18/CCL20/CXCL5/CXCL13                                                                                            | 7  |
| MF | GO:0030594 | neurotransmitter receptor activity                                      | 10/245 | 117/17697 | 5.25187E-06 | 0.000468467 | 0.000407988 | CHRM1/DRD5/GABRA1/GRIN1/HTR1A/HTR1E/HTR5A/GLRA3/HTR3B/HRH3                                                                           | 10 |
| MF | GO:0005201 | extracellular matrix structural constituent                             | 11/245 | 163/17697 | 1.72405E-05 | 0.001222835 | 0.001064966 | COL1A1/COL1A2/COL5A1/COL6A2/COL6A3/COL12A1/DPT/PCOLCE/THBS1/POSTN/COL6A5                                                             | 11 |
| MF | GO:0005539 | glycosaminoglycan binding                                               | 13/245 | 229/17697 | 1.91925E-05 | 0.001222835 | 0.001064966 | APOH/COL5A1/EPYC/IGHM/PCOLCE/REG1A/REG1B/CCL7/THBS1/CXCL13/POSTN/SUSD5/LRTM2                                                         | 13 |
| MF | GO:0048020 | CCR chemokine receptor binding                                          | 6/245  | 43/17697  | 2.62892E-05 | 0.001465623 | 0.00127641  | CCL7/CCL11/CCL13/CCL18/CCL20/CXCL13                                                                                                  | 6  |
| MF | GO:0042379 | chemokine receptor binding                                              | 7/245  | 66/17697  | 3.47627E-05 | 0.001722686 | 0.001500286 | CCL7/CCL11/CCL13/CCL18/CCL20/CXCL5/CXCL13                                                                                            | 7  |
| MF | GO:0005125 | cytokine activity                                                       | 12/245 | 220/17697 | 5.91909E-05 | 0.002639914 | 0.002299099 | CD70/CSF2/CSF3/IL6/CCL7/CCL11/CCL13/CCL18/CCL20/CXCL5/CXCL13/IL20                                                                    | 12 |

|    |            |                                                      |        |           |             |             |             |                                                                                                 |    |
|----|------------|------------------------------------------------------|--------|-----------|-------------|-------------|-------------|-------------------------------------------------------------------------------------------------|----|
| MF | GO:0004993 | G protein-coupled serotonin receptor activity        | 5/245  | 34/17697  | 9.78535E-05 | 0.003636887 | 0.003167362 | CHRM1/HTR1A/HTR1E/HTR5A/HRH3                                                                    | 5  |
| MF | GO:0099589 | serotonin receptor activity                          | 5/245  | 34/17697  | 9.78535E-05 | 0.003636887 | 0.003167362 | CHRM1/HTR1A/HTR1E/HTR5A/HRH3                                                                    | 5  |
| MF | GO:0048018 | receptor ligand activity                             | 18/245 | 482/17697 | 0.000139597 | 0.004789237 | 0.004170943 | CCK/CD70/CSF2/CSF3/EREG/IL6/LEP/NPY/REG1A/CCL7/CCL11/CCL13/CCL18/CCL20/CXCL5/CARTPT/CXCL13/IL20 | 18 |
| MF | GO:0099528 | G protein-coupled neurotransmitter receptor activity | 5/245  | 41/17697  | 0.00024356  | 0.007759128 | 0.006757418 | CHRM1/HTR1A/HTR1E/HTR5A/HRH3                                                                    | 5  |
| MF | GO:0043176 | amine binding                                        | 3/245  | 10/17697  | 0.000292708 | 0.00815923  | 0.007105867 | HTR1A/HTR1E/HTR5A                                                                               | 3  |
| MF | GO:0051378 | serotonin binding                                    | 3/245  | 10/17697  | 0.000292708 | 0.00815923  | 0.007105867 | HTR1A/HTR1E/HTR5A                                                                               | 3  |
| MF | GO:0048407 | platelet-derived growth factor binding               | 3/245  | 11/17697  | 0.000398364 | 0.010451186 | 0.00910193  | COL1A1/COL1A2/COL5A1                                                                            | 3  |
| MF | GO:0005126 | cytokine receptor binding                            | 12/245 | 286/17697 | 0.000665567 | 0.016491266 | 0.01436223  | CD70/CSF2/CSF3/IL6/CCL7/CCL11/CCL13/CCL18/CCL20/CXCL5/CXCL13/IL20                               | 12 |
| MF | GO:0042165 | neurotransmitter binding                             | 5/245  | 55/17697  | 0.000966203 | 0.022680348 | 0.019752297 | GRIN1/HTR1A/HTR1E/HTR5A/GLRA3                                                                   | 5  |
| MF | GO:0008227 | G protein-coupled amine receptor activity            | 5/245  | 59/17697  | 0.001329612 | 0.029650357 | 0.025822473 | CHRM1/HTR1A/HTR1E/HTR5A/HRH3                                                                    | 5  |

|    |                |                                                          |        |               |                 |                 |                 |                                                               |    |
|----|----------------|----------------------------------------------------------|--------|---------------|-----------------|-----------------|-----------------|---------------------------------------------------------------|----|
| MF | GO:004<br>2834 | peptidoglycan<br>binding                                 | 3/245  | 17/17<br>697  | 0.00154<br>3913 | 0.03278<br>9778 | 0.02855<br>6592 | IGHM/REG1A/REG1B                                              | 3  |
| MF | GO:000<br>1664 | G protein-<br>coupled<br>receptor<br>binding             | 11/245 | 280/1<br>7697 | 0.00186<br>8989 | 0.03788<br>9513 | 0.03299<br>7947 | FCN1/KISS1/NPY/ROR2/CCL7/CCL11/CCL13/CCL18/CCL20/CXCL5/CXCL13 | 11 |
| MF | GO:000<br>8201 | heparin<br>binding                                       | 8/245  | 169/1<br>7697 | 0.00248<br>5914 | 0.04664<br>8977 | 0.04062<br>6558 | APOH/COL5A1/PCOLCE/CCL7/THBS1/CXCL13/POSTN/LRTM2              | 8  |
| MF | GO:009<br>9095 | ligand-gated<br>anion channel<br>activity                | 3/245  | 20/17<br>697  | 0.00251<br>0259 | 0.04664<br>8977 | 0.04062<br>6558 | GABRA1/GLRA3/SLC17A7                                          | 3  |
| MF | GO:001<br>9838 | growth factor<br>binding                                 | 7/245  | 137/1<br>7697 | 0.00299<br>981  | 0.05311<br>8035 | 0.04626<br>0455 | COL1A1/COL1A2/COL5A1/IL2RA/THBS1/CXCL13/IGFBPL1               | 7  |
| MF | GO:000<br>4222 | metalloendop<br>eptidase<br>activity                     | 6/245  | 103/1<br>7697 | 0.00309<br>6567 | 0.05311<br>8035 | 0.04626<br>0455 | FAP/MME/MMP1/PAPPA/ADAM29/ADAMTS20                            | 6  |
| MF | GO:000<br>8237 | metallopeptid<br>ase activity                            | 8/245  | 181/1<br>7697 | 0.00378<br>1455 | 0.05897<br>2724 | 0.05135<br>93   | FAP/MME/MMP1/PAPPA/ADAM29/CLCA4/TRHDE/ADAMTS20                | 8  |
| MF | GO:000<br>5230 | extracellular<br>ligand-gated<br>ion channel<br>activity | 5/245  | 75/17<br>697  | 0.00383<br>4549 | 0.05897<br>2724 | 0.05135<br>93   | GABRA1/GRIN1/GLRA3/HTR3B/SLC17A7                              | 5  |
| MF | GO:007<br>0405 | ammonium<br>ion binding                                  | 5/245  | 75/17<br>697  | 0.00383<br>4549 | 0.05897<br>2724 | 0.05135<br>93   | DRD5/HTR1A/HTR1E/HTR5A/IGHM                                   | 5  |
| MF | GO:000<br>8528 | G protein-<br>coupled<br>peptide<br>receptor<br>activity | 7/245  | 146/1<br>7697 | 0.00426<br>1211 | 0.06156<br>1052 | 0.05361<br>3472 | BDKRB1/CCR8/GLP1R/XCR1/GPR17/SSTR1/MCHR2                      | 7  |
| MF | GO:000<br>8143 | poly(A)<br>binding                                       | 3/245  | 24/17<br>697  | 0.00427<br>8907 | 0.06156<br>1052 | 0.05361<br>3472 | KHDRBS2/PABPC1L2A/PABPC1L2B                                   | 3  |

|    |                |                                                                   |       |               |                 |                 |                 |                                          |   |
|----|----------------|-------------------------------------------------------------------|-------|---------------|-----------------|-----------------|-----------------|------------------------------------------|---|
| MF | GO:000<br>1653 | peptide<br>receptor<br>activity                                   | 7/245 | 152/1<br>7697 | 0.00530<br>1632 | 0.07065<br>1982 | 0.06153<br>0756 | BDKRB1/CCR8/GLP1R/XCR1/GPR17/SSTR1/MCHR2 | 7 |
| MF | GO:000<br>1637 | G protein-<br>coupled<br>chemoattract<br>ant receptor<br>activity | 3/245 | 26/17<br>697  | 0.00538<br>6025 | 0.07065<br>1982 | 0.06153<br>0756 | CCR8/XCR1/GPR17                          | 3 |
| MF | GO:000<br>4950 | chemokine<br>receptor<br>activity                                 | 3/245 | 26/17<br>697  | 0.00538<br>6025 | 0.07065<br>1982 | 0.06153<br>0756 | CCR8/XCR1/GPR17                          | 3 |
| MF | GO:000<br>5184 | neuropeptide<br>hormone<br>activity                               | 3/245 | 28/17<br>697  | 0.00665<br>0036 | 0.08474<br>0453 | 0.07380<br>0394 | CCK/NPY/CARTPT                           | 3 |
| MF | GO:000<br>5253 | anion channel<br>activity                                         | 5/245 | 89/17<br>697  | 0.00789<br>491  | 0.09004<br>8891 | 0.07842<br>3509 | GABRA1/GLRA3/CLCA4/SLC17A7/LRRC8E        | 5 |
| MF | GO:003<br>0276 | clathrin<br>binding                                               | 4/245 | 57/17<br>697  | 0.00797<br>6051 | 0.09004<br>8891 | 0.07842<br>3509 | SNAP91/NSG2/SYT13/SYT10                  | 4 |
| MF | GO:007<br>1723 | lipopeptide<br>binding                                            | 2/245 | 10/17<br>697  | 0.00798<br>2971 | 0.09004<br>8891 | 0.07842<br>3509 | CD1B/LBP                                 | 2 |
| MF | GO:000<br>8266 | poly(U) RNA<br>binding                                            | 3/245 | 30/17<br>697  | 0.00807<br>6134 | 0.09004<br>8891 | 0.07842<br>3509 | KHDRBS2/PABPC1L2A/PABPC1L2B              | 3 |
| MF | GO:007<br>0717 | poly-purine<br>tract binding                                      | 3/245 | 30/17<br>697  | 0.00807<br>6134 | 0.09004<br>8891 | 0.07842<br>3509 | KHDRBS2/PABPC1L2A/PABPC1L2B              | 3 |
| MF | GO:000<br>1786 | phosphatidyls<br>erine binding                                    | 4/245 | 58/17<br>697  | 0.00847<br>5712 | 0.09219<br>9214 | 0.08029<br>6224 | MME/THBS1/SYT13/SYT10                    | 4 |

Table S2. Data of GSEA analysis

| ID                                                                                | NE<br>S                 | p.adjust        | core_enrichment                                                                                                                                                                                                                                                                                                                                                                                                                                                                                                                                                                                                                                                                                                                                                                                                                                                                                                                                                       |
|-----------------------------------------------------------------------------------|-------------------------|-----------------|-----------------------------------------------------------------------------------------------------------------------------------------------------------------------------------------------------------------------------------------------------------------------------------------------------------------------------------------------------------------------------------------------------------------------------------------------------------------------------------------------------------------------------------------------------------------------------------------------------------------------------------------------------------------------------------------------------------------------------------------------------------------------------------------------------------------------------------------------------------------------------------------------------------------------------------------------------------------------|
| REACTOME_IMMUNOREGULATORY_INTERACTIONS_BETWEEN_A_LYMPHOID_AND_A_NON_LYMPHOID_CELL | 3.3<br>321<br>493<br>62 | 0.0239<br>07265 | CD1B/COL1A1/COL1A2/IGHV4-59/CD300E/IGHV1-2/IGKV5-2/IGKV1-39/IGHV1-46/COL3A1/IGKV2-30/TREML2/IGKV2D-30/IGHV2-70/SIGLEC12/SIGLEC6/IGKV3-15/TRAV29DV5/ICAM1/IGLV3-25/IGHV4-34/TREML4/IGKV1-16/LILRB5/IGLV3-21/IGLV1-47/SLAMF6/IGLV2-23/SIGLEC1/IGLV1-44/IGLV3-1/COLEC12/CD3E/TRAV8-4/ITGA4/TREM1/CD96/JAML/TRAV19/IGHV3-33/LILRB2/LILRB3/IGLV2-14/KIR2DL1/LILRA5/CD200R1/IGHV3-11/CD3G/IGKV1D-16/IGHV3-30/KIR2DL4/TRBV7-9/IGLV3-19/FCGR2B/CD226/IGHV2-5/IGLV1-40/LILRB1/C3/CD1C/IGLC2/IGKV1D-12/LAIR1/CD300LB/LILRA6/VCAM1/IGKV1-5/IGKV2D-28/IGHV3-23/FCGR3A/IGKV3-11/ITGB2/TRBV12-3/IGKV1D-39/IGLV2-8/SIGLEC9/IGLV2-11/SLAMF7/SIGLEC7/ULBP3/OSCAR/IGLV7-43/CLEC2B/IGKV4-1/CRTAM/IGHV1-69/ITGB7/ITGAL/SIGLEC10/ICAM3/ITGB1/NCR1/SELL/CD1D/CD300C/IGLV1-51/CD1A/IGHV4-39/IGLV6-57/NECTIN2/CD40LG/PVR/MICB/SIGLEC5/CD300LF/IGKV3-20/PILRB/CD3D/HLA-C/KIR3DL2/CD40/HLA-B/LILRA1/IGHV3-7/CD247/IFITM1/IGKV1-17/IGHV3-48/IGHV3-53/SH2D1A/IGKV1-12/CD33/SIGLEC11/PILRA/KIR3DL1 |
| REACTOME_BINDING_AND_UPTAKE_OF_LIGANDS_BY_SCAVENGER_RECEPTORS                     | 3.2<br>567<br>810<br>14 | 0.0198<br>64398 | COL1A1/COL1A2/IGHV4-59/IGHV1-2/IGKV5-2/IGKV1-39/IGHV1-46/COL3A1/IGKV2-30/IGKV2D-30/IGHV2-70/MARCO/IGKV3-15/CD163/IGLV3-25/IGHV4-34/IGKV1-16/IGLV3-21/IGLV1-47/IGLV2-23/HP/IGLV1-44/IGLV3-1/COLEC12/STAB1/SSC5D/IGHV3-33/IGLV2-14/IGHV3-11/IGKV1D-16/IGHV3-30/IGLV3-19/LRP1/APOB/IGHV2-5/APOL1/COL4A1/IGLV1-40/COL4A2/AMBP/IGLC2/IGKV1D-12/SAA1/IGHA1/IGKV1-5/IGKV2D-28/IGHV3-23/IGKV3-11/IGKV1D-39/IGLV2-8/IGLV2-11/IGLV7-43/IGKV4-1/IGHA2/IGHV1-69/CD36/IGLV1-51/IGHV4-39/STAB2/IGLV6-57/MSR1/IGKV3-20/IGHV3-7/IGKV1-17/IGHV3-48/IGHV3-53/SCARF1                                                                                                                                                                                                                                                                                                                                                                                                                     |
| KEGG_CYTOKINE_CYTOKINE_RECEPTOR_INTERACTION                                       | 3.2<br>328<br>307<br>06 | 0.0279<br>56989 | CCL13/CCL11/CSF2/CCL20/CXCL13/CCL18/XCR1/CXCL5/CCR8/CCL7/CD70/IL20/CSF3/IL6/IL2RA/LEP/CCR2/LIF/CCR4/CXCR3/PPBP/CXCR1/CXCL8/CXCL3/IL7R/IL1R1/CCL23/CXCL1/IL11/IL21R/FASLG/INHBA/IL18R1/MET/IL2RB/IL22RA1/PRLR/TNFRSF18/IL24/CSF2RB/IL19/TNFSF11/IL1R2/IL9R/TSLP/TNFSF14/CCL2/CXCL2/CCL22/TNFRSF9/IL22RA2/TNFSF4/TNFSF15/CLCF1/TNFRSF10C/CXCR5/CCR7/CCR5/OSMR/CCR6/CXCL6/IL2RG/IL4R/CXCL9/LTB/CCR1/TGFB2/IL22/TNFRSF11A/TNFRSF10A/TNFRSF10D/TNFRSF1B/PF4V1/TGFB2/CCR3/IFNG/CXCR2/CSF3R/CXCR6/IL15RA/CD27/IL10/CCL26/IL18RAP/IL10RA/IL6R/VEGFC/CXCL12/INHBE/FLT3/OSM/CCL14/CRLF2/TNFRSF17/IL1B/IL1RAP/CCL5/IL12B/CSF1R/GDF5/TNFSF8/TGFB1/EGF/IL17RA/CCL24/EDA2R/PDGFRB/CD40LG/CSF1/CCL8/FLT4/TNFRSF10B/VEGFA/IL15/XCL2/TNFRSF14/IL13RA1/IL1A/TNFRSF8/TNFRSF13B/IFNE/TGFB3/TNFSF13/CXCL10/CD40/INHBB/IL12RB1/FLT1/TNFSF10/TNFRSF1A/LTBR/IL25/ACVRL1/XCL1/PF4/HGF/IFNLR1/CXCL16/IFNA5/IFNA14/PLEKHO2/IL20RB/KDR/TNFRSF4/LTA/KITLG/PDGFA                                    |
| REACTOME_FCERI_MEDIATED_CA_2_MOBILIZATION                                         | 3.1<br>317              | 0.0198<br>64398 | IGHE/IGHV4-59/IGHV1-2/IGKV5-2/IGKV1-39/IGHV1-46/IGKV2-30/IGKV2D-30/IGHV2-70/IGKV3-15/ITK/IGLV3-25/IGHV4-34/IGKV1-16/ITPR3/IGLV3-21/IGLV1-47/IGLV2-23/IGLV1-44/IGLV3-1/GRAP2/SHC1/IGHV3-33/IGLV2-                                                                                                                                                                                                                                                                                                                                                                                                                                                                                                                                                                                                                                                                                                                                                                      |

|                                                                                           |                         |                 |                                                                                                                                                                                                                                                                                                                                                                                                                                                                                                |
|-------------------------------------------------------------------------------------------|-------------------------|-----------------|------------------------------------------------------------------------------------------------------------------------------------------------------------------------------------------------------------------------------------------------------------------------------------------------------------------------------------------------------------------------------------------------------------------------------------------------------------------------------------------------|
|                                                                                           | 459<br>75               |                 | 14/TEC/IGHV3-11/TXK/IGKV1D-16/IGHV3-30/IGLV3-19/IGHV2-5/IGLV1-40/IGLC2/IGKV1D-12/IGKV1-5/IGKV2D-28/IGHV3-23/IGKV3-11/IGKV1D-39/IGLV2-8/IGLV2-11/LCP2/IGLV7-43/IGKV4-1/VAV1/IGHV1-69/IGLV1-51/IGHV4-39/IGLV6-57/SYK/NFATC2/PLCG2/VAV2/IGKV3-20/IGHV3-7/LYN/FCER1G/IGKV1-17/IGHV3-48/IGHV3-53/ITPR2/IGKV1-12                                                                                                                                                                                     |
| REACTOME_INITIAL_TRIGGERING_OF_COMPLEMENT                                                 | 3.1<br>309<br>337       | 0.0198<br>64398 | IGHV4-59/IGHG2/IGHG4/IGHV1-2/IGKV5-2/IGKV1-39/FCN1/IGHV1-46/IGKV2-30/IGKV2D-30/IGHV2-70/IGKV3-15/IGLV3-25/FCN2/IGHV4-34/IGKV1-16/IGHG1/IGLV3-21/IGLV1-47/IGLV2-23/CFB/IGLV1-44/C1R/IGLV3-1/IGHV3-33/IGLV2-14/C1S/IGHV3-11/IGKV1D-16/IGHV3-30/IGLV3-19/IGHV2-5/IGLV1-40/C3/IGLC2/IGKV1D-12/IGKV1-5/IGKV2D-28/IGHV3-23/IGKV3-11/IGKV1D-39/IGLV2-8/IGLV2-11/IGLV7-43/IGKV4-1/IGHV1-69/IGLV1-51/IGHV4-39/IGLV6-57/C1QC/IGKV3-20/C1QA/C1QB/CFD/C2/IGHV3-7/IGKV1-17/IGHV3-48/IGHV3-53/IGKV1-12       |
| REACTOME_CREATION_OF_C4_AND_C2_ACTIVATORS                                                 | 3.1<br>163<br>560<br>32 | 0.0198<br>64398 | IGHV4-59/IGHG2/IGHG4/IGHV1-2/IGKV5-2/IGKV1-39/FCN1/IGHV1-46/IGKV2-30/IGKV2D-30/IGHV2-70/IGKV3-15/IGLV3-25/FCN2/IGHV4-34/IGKV1-16/IGHG1/IGLV3-21/IGLV1-47/IGLV2-23/IGLV1-44/C1R/IGLV3-1/IGHV3-33/IGLV2-14/C1S/IGHV3-11/IGKV1D-16/IGHV3-30/IGLV3-19/IGHV2-5/IGLV1-40/IGLC2/IGKV1D-12/IGKV1-5/IGKV2D-28/IGHV3-23/IGKV3-11/IGKV1D-39/IGLV2-8/IGLV2-11/IGLV7-43/IGKV4-1/IGHV1-69/IGLV1-51/IGHV4-39/IGLV6-57/C1QC/IGKV3-20/C1QA/C1QB/IGHV3-7/IGKV1-17/IGHV3-48/IGHV3-53/IGKV1-12                     |
| REACTOME_FCERI_MEDIATED_MAPK_ACTIVATION                                                   | 3.1<br>041<br>072<br>68 | 0.0198<br>64398 | IGHE/IGHV4-59/IGHV1-2/IGKV5-2/IGKV1-39/IGHV1-46/IGKV2-30/IGKV2D-30/IGHV2-70/IGKV3-15/IGLV3-25/IGHV4-34/IGKV1-16/IGLV3-21/IGLV1-47/IGLV2-23/IGLV1-44/IGLV3-1/GRAP2/SHC1/IGHV3-33/IGLV2-14/IGHV3-11/IGKV1D-16/IGHV3-30/IGLV3-19/IGHV2-5/IGLV1-40/IGLC2/IGKV1D-12/IGKV1-5/IGKV2D-28/IGHV3-23/IGKV3-11/IGKV1D-39/IGLV2-8/IGLV2-11/LCP2/IGLV7-43/FOS/IGKV4-1/VAV1/IGHV1-69/IGLV1-51/IGHV4-39/IGLV6-57/SYK/PLCG2/VAV2/IGKV3-20/IGHV3-7/JUN/LYN/FCER1G/IGKV1-17/IGHV3-48/IGHV3-53/IGKV1-12            |
| REACTOME_FCGR_ACTIVATION                                                                  | 3.0<br>967<br>625<br>47 | 0.0198<br>64398 | IGHV4-59/IGHG2/IGHG4/IGHV1-2/IGKV5-2/IGKV1-39/IGHV1-46/IGKV2-30/IGKV2D-30/IGHV2-70/IGKV3-15/IGLV3-25/IGHV4-34/IGKV1-16/IGHG1/IGLV3-21/IGLV1-47/IGLV2-23/IGLV1-44/IGLV3-1/IGHV3-33/IGLV2-14/IGHV3-11/CD3G/FCGR2A/IGKV1D-16/IGHV3-30/IGLV3-19/IGHV2-5/IGLV1-40/IGLC2/IGKV1D-12/IGKV1-5/IGKV2D-28/IGHV3-23/FCGR3A/IGKV3-11/IGKV1D-39/IGLV2-8/IGLV2-11/IGLV7-43/IGKV4-1/IGHV1-69/IGLV1-51/IGHV4-39/IGLV6-57/SYK/HCK/IGKV3-20/IGHV3-7/CD247/LYN/IGKV1-17/IGHV3-48/IGHV3-53/IGKV1-12                 |
| REACTOME_ROLE_OF_PHOSPHOLIPIDS_IN_PHAGOCYTOSIS                                            | 3.0<br>925<br>798<br>59 | 0.0198<br>64398 | IGHV4-59/IGHG2/IGHG4/IGHV1-2/IGKV5-2/IGKV1-39/IGHV1-46/IGKV2-30/IGKV2D-30/IGHV2-70/IGKV3-15/IGLV3-25/IGHV4-34/IGKV1-16/ITPR3/IGHG1/IGLV3-21/IGLV1-47/IGLV2-23/IGLV1-44/IGLV3-1/IGHV3-33/IGLV2-14/IGHV3-11/CD3G/FCGR2A/IGKV1D-16/IGHV3-30/IGLV3-19/IGHV2-5/IGLV1-40/IGLC2/IGKV1D-12/IGKV1-5/IGKV2D-28/IGHV3-23/FCGR3A/IGKV3-11/IGKV1D-39/IGLV2-8/IGLV2-11/IGLV7-43/IGKV4-1/IGHV1-69/IGLV1-51/IGHV4-39/IGLV6-57/SYK/PLCG2/IGKV3-20/IGHV3-7/CD247/PRKCD/IGKV1-17/IGHV3-48/IGHV3-53/ITPR2/IGKV1-12 |
| REACTOME_ANTIGEN_ACTIVATES_B_CELL_RECEPTOR_BCR_LEADING_TO_GENERATION_OF_SECOND_MESSENGERS | 3.0<br>844              | 0.0198<br>64398 | IGHM/IGHV4-59/IGHV1-2/IGKV5-2/IGKV1-39/IGHV1-46/IGKV2-30/IGKV2D-30/IGHV2-70/IGKV3-15/IGLV3-25/IGHV4-34/IGKV1-16/ITPR3/IGLV3-21/IGLV1-47/IGLV2-23/IGLV1-44/IGLV3-1/IGHV3-33/IGLV2-14/IGHV3-11/IGKV1D-16/IGHV3-30/IGLV3-19/IGHV2-5/IGLV1-40/IGLC2/IGKV1D-12/IGKV1-5/IGKV2D-28/IGHV3-23/IGKV3-                                                                                                                                                                                                    |



|                                                         |                         |                 |                                                                                                                                                                                                                                                                                                                                                                                                                                                                                                                                                                                                                                                                                                                                                                                                         |
|---------------------------------------------------------|-------------------------|-----------------|---------------------------------------------------------------------------------------------------------------------------------------------------------------------------------------------------------------------------------------------------------------------------------------------------------------------------------------------------------------------------------------------------------------------------------------------------------------------------------------------------------------------------------------------------------------------------------------------------------------------------------------------------------------------------------------------------------------------------------------------------------------------------------------------------------|
|                                                         | 995<br>47               |                 | 11/PIK3CD/IGKV1D-39/IGLV2-8/PIK3AP1/IGLV2-11/IGLV7-43/IGKV4-1/VAV1/DAPP1/IGHV1-69/BLK/IGLV1-51/IGHV4-39/IGLV6-57/SYK/PLCG2/IGKV3-20/IGHV3-7/LYN/IGKV1-17/IGHV3-48/IGHV3-53/ITPR2/IGKV1-12/PTPN6                                                                                                                                                                                                                                                                                                                                                                                                                                                                                                                                                                                                         |
| REACTOME_COMPLEMENT_CASCADE                             | 3.0<br>738<br>236<br>27 | 0.0198<br>64398 | CR1/IGHV4-59/IGHG2/IGHG4/IGHV1-2/IGKV5-2/IGKV1-39/FCN1/IGHV1-46/IGKV2-30/CPN2/IGKV2D-30/IGHV2-70/IGKV3-15/IGLV3-25/FCN2/IGHV4-34/IGKV1-16/IGHG1/IGLV3-21/IGLV1-47/IGLV2-23/CFB/IGLV1-44/C1R/IGLV3-1/CR2/CFI/C5AR1/IGHV3-33/IGLV2-14/C1S/IGHV3-11/IGKV1D-16/IGHV3-30/IGLV3-19/CFH/IGHV2-5/C4BPB/IGLV1-40/C3/IGLC2/IGKV1D-12/SERPING1/IGKV1-5/IGKV2D-28/IGHV3-23/IGKV3-11/PROS1/IGKV1D-39/IGLV2-8/IGLV2-11/IGLV7-43/IGKV4-1/C5AR2/ELANE/IGHV1-69/IGLV1-51/C3AR1/IGHV4-39/IGLV6-57/C5/C7/C1QC/IGKV3-20/C1QA/C1QB/CFD/C2/IGHV3-7/IGKV1-17/IGHV3-48/IGHV3-53                                                                                                                                                                                                                                                 |
| REACTOME_ROLE_OF_LAT2_NTAL_LAB_ON_CALCIUM_MOBILIZATION  | 3.0<br>465<br>572<br>02 | 0.0198<br>64398 | IGHE/IGHV4-59/IGHV1-2/IGKV5-2/IGKV1-39/IGHV1-46/IGKV2-30/IGKV2D-30/IGHV2-70/IGKV3-15/IGLV3-25/IGHV4-34/IGKV1-16/IGLV3-21/IGLV1-47/IGLV2-23/IGLV1-44/IGLV3-1/SHC1/IGHV3-33/IGLV2-14/IGHV3-11/IGKV1D-16/IGHV3-30/IGLV3-19/IGHV2-5/IGLV1-40/IGLC2/IGKV1D-12/IGKV1-5/IGKV2D-28/IGHV3-23/IGKV3-11/IGKV1D-39/IGLV2-8/IGLV2-11/IGLV7-43/IGKV4-1/IGHV1-69/IGLV1-51/IGHV4-39/IGLV6-57/SYK/IGKV3-20/IGHV3-7/LYN/FCER1G/IGKV1-17/IGHV3-48/IGHV3-53/IGKV1-12                                                                                                                                                                                                                                                                                                                                                        |
| REACTOME_SCAVENGING_OF_HEME_FROM_PLASMA                 | 3.0<br>426<br>267<br>49 | 0.0198<br>64398 | IGHV4-59/IGHV1-2/IGKV5-2/IGKV1-39/IGHV1-46/IGKV2-30/IGKV2D-30/IGHV2-70/IGKV3-15/CD163/IGLV3-25/IGHV4-34/IGKV1-16/IGLV3-21/IGLV1-47/IGLV2-23/HP/IGLV1-44/IGLV3-1/IGHV3-33/IGLV2-14/IGHV3-11/IGKV1D-16/IGHV3-30/IGLV3-19/LRP1/IGHV2-5/APOL1/IGLV1-40/AMBP/IGLC2/IGKV1D-12/IGHA1/IGKV1-5/IGKV2D-28/IGHV3-23/IGKV3-11/IGKV1D-39/IGLV2-8/IGLV2-11/IGLV7-43/IGKV4-1/IGHA2/IGHV1-69/IGLV1-51/IGHV4-39/IGLV6-57/IGKV3-20/IGHV3-7/IGKV1-17/IGHV3-48/IGHV3-53/IGKV1-12                                                                                                                                                                                                                                                                                                                                            |
| REACTOME_CELL_SURFACE_INTERACTIONS_AT_THE_VASCULAR_WALL | 3.0<br>358<br>508<br>16 | 0.0239<br>07265 | IGHM/COL1A1/COL1A2/IGHV4-59/IGHV1-2/IGKV5-2/MMP1/IGKV1-39/IGHV1-46/IGKV2-30/IGKV2D-30/IGHV2-70/CEACAM1/IGKV3-15/IGLV3-25/IGHV4-34/GRB7/IGKV1-16/SDC1/CD177/IGLV3-21/IGLV1-47/CEACAM3/IGLV2-23/IGLV1-44/IGLV3-1/FN1/THBD/SELE/SELP/SHC1/ITGA4/SIRPG/TREM1/JAML/IGHV3-33/IGLV2-14/ITGA3/LCK/IGHV3-11/ITGAM/IGKV1D-16/IGHV3-30/IGLV3-19/PSG4/TNFRSF10A/ITGA5/ITGB3/CD2/APOB/TNFRSF10D/IGHV2-5/DOK2/PF4V1/IGLV1-40/CD44/CD84/IGLC2/IGKV1D-12/IGHA1/IGKV1-5/IGKV2D-28/IGHV3-23/IGKV3-11/ITGB2/PROS1/IGKV1D-39/IGLV2-8/IGLV2-11/CEACAM5/IGLV7-43/IGKV4-1/IGHA2/SLC16A3/IGHV1-69/ITGAL/TGFB1/ITGB1/SELL/CAV1/IGLV1-51/IGHV4-39/IGLV6-57/GAS6/TNFRSF10B/SLC7A8/SPN/INPP5D/MERTK/IGKV3-20/CD74/IGHV3-7/LYN/FCER1G/GPC1/IGKV1-17/IGHV3-48/IGHV3-53/GLG1/SLC7A7/F11R/PECAM1/IGKV1-12/PTPN6/ITGAX/PF4/ANGPT1/ANGPT2 |
| REACTOME_FCGR3A_MEDIATED_IL10_SYNTHESIS                 | 3.0<br>192<br>758<br>93 | 0.0198<br>64398 | IGHV4-59/IGHG2/IGHG4/IGHV1-2/IGKV5-2/IGKV1-39/IGHV1-46/IGKV2-30/IGKV2D-30/IGHV2-70/IGKV3-15/IGLV3-25/IGHV4-34/IGKV1-16/ITPR3/IGHG1/IGLV3-21/IGLV1-47/IGLV2-23/IGLV1-44/IGLV3-1/IGHV3-33/IGLV2-14/IGHV3-11/CD3G/FCGR2A/IGKV1D-16/IGHV3-30/IGLV3-19/IGHV2-5/IGLV1-40/IGLC2/IGKV1D-12/ADCY7/IGKV1-5/IGKV2D-28/IL10/IGHV3-23/FCGR3A/IGKV3-11/IGKV1D-39/IGLV2-8/IGLV2-11/IGLV7-                                                                                                                                                                                                                                                                                                                                                                                                                              |

|                                                     |                         |                 |                                                                                                                                                                                                                                                                                                                                                                                                                                                                                                                                                                                                                                                                                                                                                                                                                                                                                                                                                                                                                                                                                                |
|-----------------------------------------------------|-------------------------|-----------------|------------------------------------------------------------------------------------------------------------------------------------------------------------------------------------------------------------------------------------------------------------------------------------------------------------------------------------------------------------------------------------------------------------------------------------------------------------------------------------------------------------------------------------------------------------------------------------------------------------------------------------------------------------------------------------------------------------------------------------------------------------------------------------------------------------------------------------------------------------------------------------------------------------------------------------------------------------------------------------------------------------------------------------------------------------------------------------------------|
|                                                     |                         |                 | 43/IGKV4-1/IGHV1-69/IGLV1-51/IGHV4-39/IGLV6-57/SYK/HCK/PLCG2/IGKV3-20/ADCY3/IGHV3-7/CD247/LYN/IGKV1-17/IGHV3-48/IGHV3-53/ITPR2/IGKV1-12                                                                                                                                                                                                                                                                                                                                                                                                                                                                                                                                                                                                                                                                                                                                                                                                                                                                                                                                                        |
| REACTOME_COLLAGEN_FORMATION                         | 3.0<br>154<br>789<br>89 | 0.0198<br>64398 | COL6A5/COL6A3/COL1A1/COL1A2/PCOLCE/COL5A1/COL6A2/COL12A1/LOX/COL13A1/COL14A1/COL3A1/COL8A1/LOXL4/LOXL1/MMP13/COL6A1/LAMA3/MMP7/P4HA3/COL5A2/COL15A1/ADAMTS2/COL22A1/COL21A1/ADAMTS14/COL8A2/COL7A1/PXDN/ITGB4/ADAMTS3/LOXL2/COL27A1/COL28A1/LAMC2/P4HA2/COL4A1/COL4A2/COL24A1/SERPINH1/COL18A1/COL25A1/MMP9/COLGALT1/CTSB/COL10A1/COL5A3/BMP1/PLOD2/MMP3/P3H3/CTSS/PLOD3/P3H1/LOXL3/CTSL/PLOD1/P3H2                                                                                                                                                                                                                                                                                                                                                                                                                                                                                                                                                                                                                                                                                            |
| REACTOME_INTERLEUKIN_4_AND_INTERLEUKIN_13_SIGNALING | 2.9<br>841<br>395<br>08 | 0.0198<br>64398 | CCL11/LBP/IGHE/COL1A2/IGHG4/PTGS2/F13A1/MMP1/IL6/LIF/CXCL8/ICAM1/LCN2/NOS2/FASLG/IGHG1/FN1/CCL2/CCL22/SOCS3/JAK3/ITGAM/GATA3/IL2RG/IL4R/TIMP1/TNFRSF1B/ALOX5/SAA1/VCAM1/IL10/ITGB2/PIM1/JUNB/STAT6/MMP9/IL6R/MUC1/BATF/CEBPD/OSM/FOS/IL1B/IRF4/IL12B/MMP3/TGFB1/CD36/TWIST1/ITGB1/LAMA5/SOCS1/VEGFA/IL13RA1/IL1A/CDKN1A/HMOX1/MCL1/STAT3/FOXO1/RORC/VIM/RORA/HIF1A/ITGAX/HGF/BCL6/TYK2/FOXO3/ANXA1                                                                                                                                                                                                                                                                                                                                                                                                                                                                                                                                                                                                                                                                                             |
| REACTOME_EXTRACELLULAR_MATRIX_ORGANIZATION          | 2.9<br>824<br>378<br>73 | 0.0348<br>78607 | CAPN6/COL6A5/COL6A3/THBS1/COL1A1/COL1A2/MMP1/PCOLCE/COL5A1/COL6A2/COL12A1/LOX/COL13A1/COL14A1/SERPINE1/COL3A1/LUM/COL8A1/CEACAM1/LOXL4/MFAP2/LOXL1/MMP10/MMP13/ADAM12/ICAM1/LAMB1/MFAP5/COL6A1/LAMA3/FBLN1/TNXB/FBN1/CTSG/SDC1/EMILIN1/ITGA2/MMP7/P4HA3/ADAMTS1/LTBP2/COL5A2/COL15A1/LTBP1/LAMA2/ADAMTS2/MMP14/COL22A1/ADAM8/ITGA11/ADAM19/FN1/COL21A1/ITGA4/MMP19/ADAMTS14/MMP8/LAMC1/HSPG2/COL8A2/COL7A1/BGN/FBN2/TPSAB1/CMA1/IBSP/ITGA3/ACTN1/PXDN/FBLN5/TNC/ITGB4/ADAMTS3/LOXL2/ITGAM/COL27A1/COL28A1/LAMC2/ELN/COMP/ITGA5/ITGB3/TIMP1/P4HA2/A2M/NID1/COL4A1/CD44/COL4A2/ITGA10/FBLN2/EFEMP1/COL24A1/TGFB2/LAMA4/LTBP3/MMP11/VCAM1/SERPINH1/LAMA1/MMP12/COL18A1/FURIN/ITGB2/CAPN12/COL25A1/NID2/MMP9/ADAMTS9/COLGALT1/CTSB/COL10A1/ADAM9/COL5A3/ITGAD/BMP1/PLOD2/ELANE/TNN/MMP3/P3H3/GDF5/MFAP4/ITGB7/ITGAL/TGFB1/ICAM3/ITGB1/CTSS/ITGB5/LAMB2/PLOD3/ADAMTS16/MMP25/LAMA5/CAPN11/P3H1/LOXL3/FGG/DDR2/CAST/CTSK/ITGA1/CTSL/EFEMP2/TGFB3/ASPN/PLOD1/P3H2/VWF/LAMC3/F11R/ITGA7/P4HB/PECAM1/PRSS2/DMD/ADAMTS4/CTSD/ADAM10/ITGAX/KLKB1/SH3PXD2A/COL16A1/EMILIN2/ITGA9/SPP1/AGRN/P4HA1/SDC2/FMOD |
| PID_INTEGRIN1_PATHWAY                               | 2.9<br>822<br>817<br>57 | 0.0198<br>64398 | COL6A3/THBS1/COL1A1/COL1A2/F13A1/COL5A1/COL6A2/COL3A1/LAMB1/COL6A1/LAMA3/TGFB1/FBN1/ITGA2/COL5A2/LAMA2/ITGA11/FN1/ITGA4/NPNT/LAMC1/COL7A1/PLAUR/ITGA3/TNC/LAMC2/ITGA5/NID1/COL4A1/ITGA10/LAMA4/TGM2/VCAM1/LAMA1/COL18A1/CD14/PLAU/ITGB1/LAMB2/LAMA5/VEGFA/FGG/ITGA1/THBS2                                                                                                                                                                                                                                                                                                                                                                                                                                                                                                                                                                                                                                                                                                                                                                                                                      |
| REACTOME_CD22_MEDIATED_BCR_REGULATION               | 2.9<br>745<br>410<br>72 | 0.0198<br>64398 | IGHM/IGHV4-59/IGHV1-2/IGKV5-2/IGKV1-39/IGHV1-46/IGKV2-30/IGKV2D-30/IGHV2-70/IGKV3-15/IGLV3-25/IGHV4-34/IGKV1-16/IGLV3-21/IGLV1-47/IGLV2-23/IGLV1-44/IGLV3-1/IGHV3-33/IGLV2-14/IGHV3-11/IGKV1D-16/IGHV3-30/IGLV3-19/IGHV2-5/IGLV1-40/IGLC2/IGKV1D-12/IGKV1-5/IGKV2D-28/IGHV3-23/IGKV3-11/IGKV1D-                                                                                                                                                                                                                                                                                                                                                                                                                                                                                                                                                                                                                                                                                                                                                                                                |

|                                                                       |                         |                 |                                                                                                                                                                                                                                                                                                                                                                                                                                                                                                                                                                              |
|-----------------------------------------------------------------------|-------------------------|-----------------|------------------------------------------------------------------------------------------------------------------------------------------------------------------------------------------------------------------------------------------------------------------------------------------------------------------------------------------------------------------------------------------------------------------------------------------------------------------------------------------------------------------------------------------------------------------------------|
|                                                                       |                         |                 | 39/IGLV2-8/IGLV2-11/IGLV7-43/IGKV4-1/IGHV1-69/IGLV1-51/IGHV4-39/IGLV6-57/IGKV3-20/IGHV3-7/LYN/IGKV1-17/IGHV3-48/IGHV3-53/IGKV1-12/PTPN6                                                                                                                                                                                                                                                                                                                                                                                                                                      |
| REACTOME_PARASITE_INFECTI                                             | 2.9<br>639<br>198<br>17 | 0.0198<br>64398 | IGHV4-59/IGHG2/IGHG4/IGHV1-2/IGKV5-2/IGKV1-39/IGHV1-46/IGKV2-30/IGKV2D-30/IGHV2-70/IGKV3-15/IGLV3-25/IGHV4-34/IGKV1-16/IGHG1/IGLV3-21/IGLV1-47/IGLV2-23/IGLV1-44/IGLV3-1/IGHV3-33/IGLV2-14/IGHV3-11/CD3G/IGKV1D-16/IGHV3-30/IGLV3-19/IGHV2-5/IGLV1-40/MYH9/IGLC2/MYO1C/IGKV1D-12/ARPC1B/IGKV1-5/IGKV2D-28/IGHV3-23/FCGR3A/IGKV3-11/IGKV1D-39/IGLV2-8/NCKAP1L/IGLV2-11/IGLV7-43/IGKV4-1/VAV1/IGHV1-69/IGLV1-51/IGHV4-39/IGLV6-57/SYK/WIPF3/WAS/HCK/WIPF1/VAV2/IGKV3-20/IGHV3-7/CD247/LYN/IGKV1-17/IGHV3-48/IGHV3-53/IGKV1-12/WASF2/MYO9B                                      |
| REACTOME_INTERLEUKIN_10_SIGNALING                                     | 2.9<br>465<br>369<br>53 | 0.0198<br>64398 | CSF2/CCL20/PTGS2/CSF3/IL6/CCR2/LIF/CXCL8/IL1R1/CXCL1/ICAM1/IL1RN/IL1R2/CCL2/CXCL2/CCL22/CCR5/CCR1/TIMP1/TNFRSF1B/IL10/CD80/IL10RA/IL1B/CCL5/IL12B/FPR1/PTAFR/CSF1/IL1A/CXCL10/STAT3                                                                                                                                                                                                                                                                                                                                                                                          |
| REACTOME_CHEMOKINE_RECEPTORS_BIND_CHEMOKINES                          | 2.9<br>430<br>441<br>56 | 0.0198<br>64398 | CCL13/CCL11/CCL20/CXCL13/XCR1/CXCL5/CCR8/CCL7/CCR2/CCR4/CXCR3/PPBP/CXCR1/CXCL8/CXCL3/CXCL1/CCL2/CXCL2/CCL22/CXCR5/CCR7/CCR5/CCR6/CXCL6/CXCL9/CCR1/CCR3/CXCR2/CXCR6/CXCL12/CCL5                                                                                                                                                                                                                                                                                                                                                                                               |
| REACTOME_INTEGRIN_CELL_SURFACE_INTERACTIONS                           | 2.9<br>375<br>565<br>38 | 0.0198<br>64398 | COL6A5/COL6A3/THBS1/COL1A1/COL1A2/COL5A1/COL6A2/COL13A1/COL3A1/LUM/COL8A1/ICAM1/COL6A1/FBN1/ITGA2/COL5A2/ITGA11/FN1/ITGA4/HSPG2/COL8A2/COL7A1/IBSP/ITGA3/TNC/ITGAM/COMP/ITGA5/ITGB3/COL4A1/CD44/COL4A2/ITGA10/VCAM1/COL18A1/ITGB2/COL10A1/COL5A3/ITGAD/ITGB7/ITGAL/ICAM3/ITGB1/ITGB5/FGG/ITGA1/VWF/F11R/ITGA7/PECAM1/ITGAX/COL16A1/ITGA9/SPP1/AGRN                                                                                                                                                                                                                           |
| REACTOME_ASSEMBLY_OF_COLLAGEN_FIBRILS_AND_OTHER_MULTIMERIC_STRUCTURES | 2.9<br>260<br>576<br>33 | 0.0198<br>64398 | COL6A5/COL6A3/COL1A1/COL1A2/PCOLCE/COL5A1/COL6A2/COL12A1/LOX/COL14A1/COL3A1/COL8A1/LOXL4/LOXL1/MMP13/COL6A1/LAMA3/MMP7/COL5A2/COL15A1/COL8A2/COL7A1/PXDN/ITGB4/LOXL2/COL27A1/LAMC2/COL4A1/COL4A2/COL24A1/COL18A1/MMP9/CTSB/COL10A1/COL5A3/BMP1/MMP3/CTSS                                                                                                                                                                                                                                                                                                                     |
| REACTOME_FCGAMMA_RECEPTOR_FCGR_DEPENDENT_PHAGOCYTOSIS                 | 2.8<br>957<br>842<br>31 | 0.0200<br>71884 | IGHV4-59/IGHG2/IGHG4/IGHV1-2/IGKV5-2/IGKV1-39/IGHV1-46/IGKV2-30/IGKV2D-30/IGHV2-70/IGKV3-15/IGLV3-25/IGHV4-34/IGKV1-16/ITPR3/IGHG1/IGLV3-21/IGLV1-47/IGLV2-23/IGLV1-44/IGLV3-1/IGHV3-33/IGLV2-14/IGHV3-11/CD3G/FCGR2A/IGKV1D-16/IGHV3-30/IGLV3-19/IGHV2-5/IGLV1-40/MYH9/IGLC2/MYO1C/IGKV1D-12/ARPC1B/IGKV1-5/IGKV2D-28/IGHV3-23/FCGR3A/IGKV3-11/IGKV1D-39/IGLV2-8/NCKAP1L/IGLV2-11/IGLV7-43/IGKV4-1/VAV1/IGHV1-69/IGLV1-51/IGHV4-39/IGLV6-57/SYK/WIPF3/WAS/HCK/WIPF1/PLCG2/VAV2/LIMK1/IGKV3-20/IGHV3-7/CD247/PRKCD/LYN/IGKV1-17/IGHV3-48/IGHV3-53/ITPR2/IGKV1-12/WASF2/MYO9B |

|                                                      |                         |                 |                                                                                                                                                                                                                                                                                                                                                                                                                                                                                                                                                                                                                                                                                                                                                                     |
|------------------------------------------------------|-------------------------|-----------------|---------------------------------------------------------------------------------------------------------------------------------------------------------------------------------------------------------------------------------------------------------------------------------------------------------------------------------------------------------------------------------------------------------------------------------------------------------------------------------------------------------------------------------------------------------------------------------------------------------------------------------------------------------------------------------------------------------------------------------------------------------------------|
| KEGG_HEMATOPOIETIC_CELL_LINEAGE                      | 2.8<br>324<br>673<br>84 | 0.0198<br>64398 | MME/CR1/CSF2/CD1B/CSF3/IL6/IL2RA/ANPEP/IL7R/IL1R1/IL11/ITGA2/IL1R2/IL9R/CR2/CD3E/ITGA4/ITGA3/CD5/ITGAM/CD3G/IL4R/ITGA5/ITGB3/CD2/CD44/CD1C/CD1E/CD7/CSF3R/CD14/IL6R/FLT3/IL1B/CD4/CSF1R/MS4A1/CD36/DNTT/CD1D/CD1A/CSF1/IL1A/ITGA1/GP1BA/CD3D                                                                                                                                                                                                                                                                                                                                                                                                                                                                                                                        |
| REACTOME_COLLAGEN_DEGRADATION                        | 2.8<br>275<br>397<br>75 | 0.0198<br>64398 | COL6A5/COL6A3/COL1A1/COL1A2/MMP1/COL5A1/COL6A2/COL12A1/COL13A1/COL14A1/COL3A1/COL8A1/MP10/MMP13/COL6A1/MMP7/COL5A2/COL15A1/MMP14/MMP19/MMP8/COL8A2/COL7A1/COL4A1/COL4A2/MP11/MMP12/COL18A1/FURIN/COL25A1/MMP9/CTSB/COL10A1/ADAM9/COL5A3/ELANE/MMP3                                                                                                                                                                                                                                                                                                                                                                                                                                                                                                                  |
| PID_SYNDECAN_1_PATHWAY                               | 2.8<br>071<br>321<br>76 | 0.0198<br>64398 | COL6A3/COL1A1/COL1A2/MMP1/COL5A1/COL6A2/COL12A1/COL13A1/COL14A1/COL3A1/COL8A1/COL6A1/SDC1/MMP7/MET/COL5A2/COL15A1/COL8A2/COL7A1/COL4A1/MMP9/COL10A1/CCL5/TGFB1/HPSE/LAMA5                                                                                                                                                                                                                                                                                                                                                                                                                                                                                                                                                                                           |
| NABA_CORE_MATRISOME                                  | 2.8<br>060<br>628<br>01 | 0.0297<br>13729 | COL6A5/EPYC/COL6A3/THBS1/COL1A1/COL1A2/DPT/PCOLCE/POSTN/COL5A1/COL6A2/KERA/COL12A1/AMBN/COL13A1/MXRA5/COL14A1/SBSPON/COL3A1/LUM/CCN1/COL8A1/MFAP2/VIT/LAMB1/MFAP5/COL6A1/LAMA3/TGFB1/FBLN1/FNDC1/TNXB/FBN1/EMILIN1/SPON2/LTBP2/PODNL1/COL5A2/COL15A1/SNED1/LTBP1/LAMA2/SVEP1/COL22A1/SRPX2/FN1/COL21A1/LRG1/PXDNL/FBLN7/NPNT/PAPLN/LAMC1/HSPG2/COL8A2/COL7A1/BGN/FBN2/IBSP/AEBP1/PXDN/FBLN5/TNC/COL27A1/ZPLD1/COL28A1/IGFBP6/LAMC2/ELN/COMP/SMOC2/IGFBP3/NID1/COL4A1/CRISPLD2/COL4A2/CCN4/THBS3/FBLN2/EFEMP1/COL24A1/IGFBP4/LAMA4/LTBP3/HMCN2/LAMA1/COL18A1/ESM1/EGFLAM/COL25A1/NID2/SRPX/COL10A1/COL5A3/NDNF/SLIT3/CTHRC1/ECM1/CCN2/TNN/HMCN1/PRG4/MFAP4/CRIM1/HAPLN4/LAMB2/GAS6/LAMA5/ZP4/OGN/SPOCK2/FGG/TSKU/THBS2/DMBT1/EFEMP2/ASPN/SLIT2/SRGN/VWF/LAMC3/HAPLN3 |
| WP_TYROBP_CAUSAL_NETWORK                             | 2.7<br>978<br>160<br>2  | 0.0198<br>64398 | DPYD/ELF4/TCIRG1/RBM47/ITGAM/TNFRSF1B/C3/CD84/TMEM106A/ITGB2/IL10RA/HLX/NCF2/NCKAP1L/LHFPL2/CD4/STAT5A/LGALS9C/SH2B3/ZFP36L2/HCLS1/PLEK/LOXL3/CREB3L2/GAPT/GAL3ST4/IL13RA1/BIN2/ADAP2/C1QC/NRROS/PPP1R18/SAMSN1/RUNX3/SLC7A7/CD37/ITGAX/MAF/NPC2/FKBP15/CXCL16/SPP1/SLC1A5/RNASE6/APBB1IP                                                                                                                                                                                                                                                                                                                                                                                                                                                                           |
| REACTOME_COLLAGEN_BIOSYNTHESIS_AND_MODIFYING_ENZYMES | 2.7<br>976<br>488<br>66 | 0.0198<br>64398 | COL6A5/COL6A3/COL1A1/COL1A2/PCOLCE/COL5A1/COL6A2/COL12A1/COL13A1/COL14A1/COL3A1/COL8A1/COL6A1/P4HA3/COL5A2/COL15A1/ADAMTS2/COL22A1/COL21A1/ADAMTS14/COL8A2/COL7A1/ADAMTS3/COL27A1/COL28A1/P4HA2/COL4A1/COL4A2/COL24A1/SERPINH1/COL18A1/COL25A1/COLGALT1/COL10A1/COL5A3/BMP1/PLOD2/P3H3/PLOD3/P3H1                                                                                                                                                                                                                                                                                                                                                                                                                                                                   |
| REACTOME_NEUTROPHIL_DEGRANULATION                    | 2.7<br>810<br>296<br>49 | 0.0459<br>01829 | MME/CR1/ORM1/ADGRE3/MCEMP1/ABCA13/FCN1/FPR2/ANPEP/RETN/PPBP/CLEC4D/CXCR1/CEACAM1/CXCL1/FCAR/LCN2/CTSG/CD177/HK3/CEACAM3/PTX3/HP/ADGRG3/ADAM8/B4GALT1/CHRN4/LRG1/CTS2/SERPINA1/GPR84/MMP8/RAB27A/CHI3L1/LTF/C5AR1/LILRB2/LILRB3/PLAUR/TCIRG1/SLC2A3/FCGR3B/ITGAM/CD93/FCGR2A/CNN2/SLC11A1/PGLYRP1/CYBB/IQGAP1/TARM1/TNFRSF1B/NFAM1/CRISPLD2/CD44/LYZ/TI                                                                                                                                                                                                                                                                                                                                                                                                              |

|                                                |                         |                 |                                                                                                                                                                                                                                                                                                                                                                                                                                                                                                                                                                                                                                                                                                                                                                                                                                                                                                                                                                                                                                                                                    |
|------------------------------------------------|-------------------------|-----------------|------------------------------------------------------------------------------------------------------------------------------------------------------------------------------------------------------------------------------------------------------------------------------------------------------------------------------------------------------------------------------------------------------------------------------------------------------------------------------------------------------------------------------------------------------------------------------------------------------------------------------------------------------------------------------------------------------------------------------------------------------------------------------------------------------------------------------------------------------------------------------------------------------------------------------------------------------------------------------------------------------------------------------------------------------------------------------------|
|                                                |                         |                 | CAM2/PTPRC/ALOX5/C3/TXNDC5/SLCO4C1/IGF2R/DOK3/DEFA4/CTSC/LAIR1/CLEC5A/TCN1/TLR2/CXCR2/S100A8/DOCK2/TBC1D10C/PYGL/RNASE2/ITGB2/MMP9/CD14/SLPI/MNDA/S100A9/VCL/SIGLEC9/CTSB/TRPM2/NCKAP1L/NBEAL2/ARG1/MVP/CAMP/GAA/PLAU/OSCAR/RAB44/CRACR2A/VNN1/ELANE/ALDH3B1/MAN2B1/FPR1/ITGAL/ATP8B4/SIGLEC14/CD36/HPSE/GUSB/SELL/GLIPR1/CTSS/SERPINA3/ARHGAP9/C3AR1/JUP/S100A5/MMP25/PTAFR/ARHGAP45/IQGAP2/DNASE1L1/GRN/ANXA2/GNS/HGSNAT/CD68/SIRPB1/FABP5/ATP11A/AGPAT2/BIN2/RNASE3/HEXB/HSPA1B/STING1/DNAJC3/SIGLEC5/ADGRE5/CTSA/S100P/NFKB1/HLA-C/HSPA6/HSPA1A/CFD/ANO6/HLA-B/FUCA1/S100A11/KRT1/PRKCD/P2RX1/RAB3D/FCER1G/UNC13D/LGALS3/FGL2/AMPD3/CD53/CDK13/PECAM1/PRSS2/GALNS/ADA2/CD33/PTPN6/RAP2B/STOM/S100A12/CTSD/MANBA/PTPRJ/ADAM10/ITGAX/CKAP4/CFP/ROCK1/FUCA2/LAMP1/NPC2/GSDMD/NHLRC3/ATP11B/AOC1/MGAM/PLEKHO2                                                                                                                                                                                                                                                                      |
| REACTOME_MET_PROMOTES_CELL_MOTILITY            | 2.7<br>630<br>084<br>01 | 0.0198<br>64398 | COL1A1/COL1A2/TNS4/COL5A1/COL3A1/LAMB1/LAMA3/ITGA2/MET/COL5A2/LAMA2/FN1/LAMC1/ITGA3/COL27A1/LAMC2/COL24A1/LAMA4/LAMA1/COL5A3/ITGB1/LAMB2/LAMA5                                                                                                                                                                                                                                                                                                                                                                                                                                                                                                                                                                                                                                                                                                                                                                                                                                                                                                                                     |
| REACTOME_SIGNALING_BY_INTERLEUKINS             | 2.7<br>494<br>308<br>92 | 0.0459<br>01829 | CCL11/CSF2/CCL20/LBP/IGHE/COL1A2/IL20/IL31RA/IGHG4/PTGS2/F13A1/MMP1/CSF3/IL6/IL2RA/CCR2/LIF/IL36B/CXCL8/IL7R/IL1R1/IL36RN/CXCL1/IL11/ICAM1/IL21R/LCN2/NOS2/CTSG/SDC1/FASLG/SOD2/IL18R1/IGHG1/IL2RB/IL22RA1/IL24/IL1RN/CSF2RB/IL19/CISH/IL1R2/FN1/IL9R/TSLP/CCL2/CXCL2/CCL22/IL22RA2/SHC1/SOCS3/JAK3/CLCF1/NOD2/CCR5/TEC/SERPINB2/OSMR/LCK/ITGAM/GATA3/IL2RG/IL4R/CCR1/CNN2/IL22/TIMP1/TNFRSF1B/IL36G/ALOX5/PTPN14/SAA1/LCP1/IFNG/CSF3R/MAP3K8/VCAM1/IL15RA/IL10/CD80/PTPN7/ITGB2/PIM1/PIK3CD/IL1RL1/JUNB/IL1RL2/NFKB2/STAT6/IL18RAP/MMP9/IL10RA/IL6R/MUC1/BATF/CEBPD/OSM/CRLF2/IL37/FOS/IL1B/IL1RAP/IRF4/CD4/CCL5/VAV1/IL12B/IRAK3/CSF1R/MMP3/FPR1/TGFB1/CD36/TWIST1/IL17RA/ITGB1/STAT5A/PTPN12/PTAFR/DUSP4/SYK/MSN/LAMA5/ANXA2/CSF1/SOCS1/VEGFA/HCK/IL15/INPP5D/IL13RA1/IL1A/IRS1/RAG1/CDKN1A/IRAK2/STXB2/HMOX1/NFKB1/MCL1/IRS2/CXCL10/IL27RA/RPS6KA3/STAT3/STAT2/MYD88/FOXO1/PTPN9/RORC/JUN/LYN/VIM/IL12RB1/CASP1/TNFRSF1A/P4HB/RORA/IL16/IL27/PTPN6/IL25/HIF1A/NFKBIA/S100A12/ITGAX/IL18BP/MAP3K3/SMAD3/HGF/DUSP6/IFNLR1/PTPN18/BCL6/TYK2/MAP2K3/FOXO3/ANXA1/IL20RB/IL32/INPPL1 |
| WP_MIRNA_TARGETS_IN_ECM_AND_MEMBRANE_RECEPTORS | 2.7<br>484<br>537<br>75 | 0.0198<br>64398 | COL6A3/THBS1/COL1A2/COL5A1/COL6A2/COL3A1/COL6A1/TNXB/COL5A2/ITGA11/FN1/LAMC1/COL4A1/COL4A2/LAMA4/MIR548AA1/COL5A3/MIR219A1/MIR30C2/ITGB5/LAMB2/MIR200A/ITGA1/THBS2/MIR429/MIR200B                                                                                                                                                                                                                                                                                                                                                                                                                                                                                                                                                                                                                                                                                                                                                                                                                                                                                                  |
| KEGG_ECM_RECEPTOR_INTERACTION                  | 2.7<br>405              | 0.0198<br>64398 | COL6A3/THBS1/COL1A1/COL1A2/COL5A1/COL6A2/COL3A1/LAMB1/COL6A1/LAMA3/TNXB/SDC1/ITGA2/COL5A2/LAMA2/ITGA11/FN1/ITGA4/LAMC1/HSPG2/IBSP/ITGA3/TNC/ITGB4/LAMC2/COMP/ITGA5/ITGB3/COL4A1/                                                                                                                                                                                                                                                                                                                                                                                                                                                                                                                                                                                                                                                                                                                                                                                                                                                                                                   |

|                                                                                      |                         |                 |                                                                                                                                                                                                                                                                                                                                                                                                                                                                                                                                                     |
|--------------------------------------------------------------------------------------|-------------------------|-----------------|-----------------------------------------------------------------------------------------------------------------------------------------------------------------------------------------------------------------------------------------------------------------------------------------------------------------------------------------------------------------------------------------------------------------------------------------------------------------------------------------------------------------------------------------------------|
|                                                                                      | 796<br>68               |                 | CD44/COL4A2/ITGA10/THBS3/LAMA4/LAMA1/COL5A3/TNN/ITGB7/CD36/ITGB1/ITGB5/LAMB2/LAMA5/ITGA1/T<br>HBS2/GP1BA/VWF/LAMC3                                                                                                                                                                                                                                                                                                                                                                                                                                  |
| REACTOME_ELASTIC_FIBRE_FORMATION                                                     | 2.7<br>301<br>080<br>02 | 0.0198<br>64398 | LOX/LOXL4/MFAP2/LOXL1/MFAP5/FBLN1/FBN1/EMILIN1/LTBP2/LTBP1/FN1/FBN2/FBLN5/LOXL2/ELN/ITGA5/I<br>TGB3/FBLN2/EFEMP1/TGFB2/LTBP3/FURIN/GDF5/MFAP4/TGFB1/ITGB1/ITGB5/LOXL3/EFEMP2/TGFB3                                                                                                                                                                                                                                                                                                                                                                  |
| NABA_COLLAGENS                                                                       | 2.7<br>252<br>878<br>06 | 0.0198<br>64398 | COL6A5/COL6A3/COL1A1/COL1A2/COL5A1/COL6A2/COL12A1/COL13A1/COL14A1/COL3A1/COL8A1/COL6A1<br>/COL5A2/COL15A1/COL22A1/COL21A1/COL8A2/COL7A1/COL27A1/COL28A1/COL4A1/COL4A2/COL24A1/COL<br>18A1/COL25A1/COL10A1/COL5A3                                                                                                                                                                                                                                                                                                                                    |
| REACTOME_COLLAGEN_CHAIN_TRIMERIZATION                                                | 2.7<br>252<br>878<br>06 | 0.0198<br>64398 | COL6A5/COL6A3/COL1A1/COL1A2/COL5A1/COL6A2/COL12A1/COL13A1/COL14A1/COL3A1/COL8A1/COL6A1<br>/COL5A2/COL15A1/COL22A1/COL21A1/COL8A2/COL7A1/COL27A1/COL28A1/COL4A1/COL4A2/COL24A1/COL<br>18A1/COL25A1/COL10A1/COL5A3                                                                                                                                                                                                                                                                                                                                    |
| KEGG_LEISHMANIA_INFECTIO                                                             | 2.7<br>040<br>744<br>22 | 0.0198<br>64398 | CR1/PTGS2/NOS2/FCGR2C/ITGA4/FCGR3B/ITGAM/FCGR2A/C3/MAPK13/TGFB2/IFNG/TLR2/IL10/FCGR3A/IT<br>GB2/HLA-DQA1/NCF2/HLA-DOA/FOS/IL1B/IL12B/TGFB1/HLA-DQA2/HLA-DQB1/ITGB1/IL1A/NCF1/TGFB3/HLA-<br>DPA1/NFKB1/MYD88/JUN/HLA-DRB1/PTPN6/NFKBIA/HLA-DPB1/NCF4/JAK2/TRAF6/FCGR1A/HLA-<br>DMA/TLR4/MAPK14/IRAK1/HLA-DOB                                                                                                                                                                                                                                         |
| WP_INTERACTIONS_BETWEEN_IMMUNE_CELLS_<br>AND_MICRORNAS_IN_TUMOR_MICROENVIRONM<br>ENT | 2.6<br>773<br>818<br>17 | 0.0198<br>64398 | IL2RA/MIR23A/IL2RB/CCL2/MIR27A/TLR8/IL2RG/IL4R/CTLA4/TGFBR2/MIR210/CD274/TGFB2/CD80/NFKB2/ST<br>AT6/CCL5/TLR7/TGFB1/SOCS1/MIR200A/PDCD1/TGFB3/NFKB1/CXCL10/STAT3/MIRLET7D/MIR200B                                                                                                                                                                                                                                                                                                                                                                   |
| PID_UPA_UPAR_PATHWAY                                                                 | 2.6<br>716<br>293<br>91 | 0.0198<br>64398 | FPR2/SERPINE1/MMP13/CTSG/FN1/FPR3/PLAUR/ITGA3/ITGAM/LRP1/ITGA5/ITGB3/MMP12/ITGB2/MMP9/PL<br>AU/ELANE/MMP3/FPR1/TGFB1/ITGB1/ITGB5/PDGFRB/FGG                                                                                                                                                                                                                                                                                                                                                                                                         |
| REACTOME_SIGNALING_BY_THE_B_CELL_RECEP<br>TOR_BCR_                                   | 2.6<br>716<br>043<br>87 | 0.0220<br>41656 | IGHM/IGHV4-59/IGHV1-2/IGKV5-2/IGKV1-39/IGHV1-46/IGKV2-30/IGKV2D-30/IGHV2-70/IGKV3-15/IGLV3-<br>25/IGHV4-34/IGKV1-16/ITPR3/IGLV3-21/IGLV1-47/IGLV2-23/IGLV1-44/IGLV3-1/IGHV3-33/IGLV2-14/IGHV3-<br>11/IGKV1D-16/IGHV3-30/IGLV3-19/IGHV2-5/IGLV1-40/IGLC2/IGKV1D-12/IGKV1-5/IGKV2D-28/IGHV3-23/IGKV3-<br>11/PIK3CD/IGKV1D-39/IGLV2-8/REL/PIK3AP1/IGLV2-11/IGLV7-43/IGKV4-1/VAV1/DAPP1/IGHV1-69/BLK/IGLV1-<br>51/IGHV4-39/IGLV6-57/SYK/NFATC2/PLCG2/IGKV3-20/NFKB1/IGHV3-7/LYN/CARD11/IGKV1-17/IGHV3-<br>48/IGHV3-53/ITPR2/MALT1/IGKV1-12/PTPN6/NFKBIA |

|                                                  |                         |                 |                                                                                                                                                                                                                                                                                                                                                                                                                                                                                                                                               |
|--------------------------------------------------|-------------------------|-----------------|-----------------------------------------------------------------------------------------------------------------------------------------------------------------------------------------------------------------------------------------------------------------------------------------------------------------------------------------------------------------------------------------------------------------------------------------------------------------------------------------------------------------------------------------------|
| KEGG_JAK_STAT_SIGNALING_PATHWAY                  | 2.6<br>707<br>841       | 0.0214<br>15069 | CSF2/IL20/CSF3/IL6/IL2RA/LEP/LIF/IL7R/CBLC/IL11/IL21R/IL2RB/IL22RA1/PRLR/IL24/CSF2RB/IL19/CISH/IL9R/TSLP/IL22RA2/SOCS3/JAK3/CLCF1/OSMR/IL2RG/IL4R/IL22/PIK3CG/IFNG/CSF3R/IL15RA/IL10/PIM1/PIK3CD/SPRY4/STAT6/IL10RA/IL6R/PIK3R5/OSM/CRLF2/IL12B/STAT5A/SOCS1/SPRY1/IL15/IL13RA1/IFNE/SPRED2/STAT3/STAT2/SPRY2/IL12RB1/PTPN6/IFNLR1/IFNA5/IFNA14/TYK2/IL20RB/EP300/JAK2/IFNAR1/IL10RB/IL23A/PIAS3                                                                                                                                              |
| WP_HUMAN_COMPLEMENT_SYSTEM                       | 2.6<br>688<br>368<br>59 | 0.0198<br>64398 | CR1/THBS1/F13A1/FCN1/ICAM1/LAMB1/FCN2/ITGA2/PTX3/CFB/C1R/SELE/CR2/SELP/LAMC1/CFI/C5AR1/PLAUR/IBSP/C1S/CD93/CFH/ITGB3/C3/SERPING1/TLR2/FCGR3A/ADM/ITGB2/PROS1/GNA15/C5AR2/ELANE/FPR1/VSIG4/SELL/C3AR1/LAMA5/WAS/C5/FGG/C7/F11/CFD/CD40/C2/C8A/ITGAX/CLEC4M/CFP/KLKB1/SPP1/CRP/CD55/CD46/C4A/SFTPA1                                                                                                                                                                                                                                             |
| REACTOME_DEGRADATION_OF_THE_EXTRACELLULAR_MATRIX | 2.6<br>583<br>604<br>99 | 0.0199<br>95966 | CAPN6/COL6A5/COL6A3/COL1A1/COL1A2/MMP1/COL5A1/COL6A2/COL12A1/COL13A1/COL14A1/COL3A1/COL8A1/MMP10/MMP13/LAMB1/COL6A1/LAMA3/FBN1/CTSG/MMP7/ADAMTS1/COL5A2/COL15A1/MMP14/ADAM8/FN1/MMP19/MMP8/LAMC1/HSPG2/COL8A2/COL7A1/FBN2/TPSAB1/CMA1/LAMC2/ELN/TIMP1/A2M/NID1/COL4A1/CD44/COL4A2/MMP11/MMP12/COL18A1/FURIN/CAPN12/COL25A1/MMP9/ADAMTS9/CTSB/COL10A1/ADAM9/COL5A3/BMP1/ELANE/MMP3/CTSS/ADAMTS16/MMP25/LAMA5/CAPN11/CAST/CTSK/CTSL                                                                                                             |
| REACTOME_FC_EPSILON_RECEPTOR_FCERI_SIGNALING     | 2.6<br>582<br>648<br>78 | 0.0239<br>07265 | IGHE/IGHV4-59/IGHV1-2/IGKV5-2/IGKV1-39/IGHV1-46/IGKV2-30/IGKV2D-30/IGHV2-70/IGKV3-15/ITK/IGLV3-25/IGHV4-34/IGKV1-16/ITPR3/IGLV3-21/IGLV1-47/IGLV2-23/IGLV1-44/IGLV3-1/GRAP2/SHC1/IGHV3-33/IGLV2-14/TEC/IGHV3-11/TXK/IGKV1D-16/IGHV3-30/IGLV3-19/IGHV2-5/IGLV1-40/IGLC2/IGKV1D-12/IGKV1-5/IGKV2D-28/IGHV3-23/IGKV3-11/IGKV1D-39/IGLV2-8/IGLV2-11/LCP2/IGLV7-43/FOS/IGKV4-1/VAV1/IGHV1-69/IGLV1-51/IGHV4-39/IGLV6-57/RASGRP4/SYK/NFATC2/PLCG2/VAV2/IGKV3-20/NFKB1/IGHV3-7/JUN/LYN/FCER1G/CARD11/IGKV1-17/IGHV3-48/IGHV3-53/ITPR2/MALT1/IGKV1-12 |
| REACTOME_MET_ACTIVATES_PTK2_SIGNALING            | 2.6<br>464<br>696<br>49 | 0.0198<br>64398 | COL1A1/COL1A2/COL5A1/COL3A1/LAMB1/LAMA3/ITGA2/MET/COL5A2/LAMA2/FN1/LAMC1/ITGA3/COL27A1/LAMC2/COL24A1/LAMA4/LAMA1/COL5A3/ITGB1/LAMB2/LAMA5                                                                                                                                                                                                                                                                                                                                                                                                     |
| WP_INFLAMMATORY_RESPONSE_PATHWAY                 | 2.6<br>409<br>348<br>71 | 0.0198<br>64398 | THBS1/COL1A1/COL1A2/IL2RA/COL3A1/LAMB1/IL2RB/FN1/LAMC1/LCK/IL2RG/IL4R/LAMC2/TNFRSF1B/THBS3/IFNG/CD80/CD28/ZAP70/LAMB2/CD40LG/LAMA5                                                                                                                                                                                                                                                                                                                                                                                                            |
| REACTOME_ECM_PROTEOGLYCANS                       | 2.6<br>331<br>673<br>33 | 0.0198<br>64398 | COL6A5/COL6A3/COL1A1/COL1A2/COL5A1/COL6A2/SERPINE1/COL3A1/LUM/LAMB1/COL6A1/LAMA3/TNXB/ITGA2/COL5A2/LAMA2/FN1/LAMC1/HSPG2/BGN/IBSP/TNC/COMP/ITGB3/COL4A1/COL4A2/TGFB2/LAMA4/LAMA1/COL5A3/TNN/TGFB1/ITGB1/ITGB5/LAMB2/LAMA5/TGFB3/ASPN                                                                                                                                                                                                                                                                                                          |

|                                                        |                         |                 |                                                                                                                                                                                                                                                                                                                                                                                                                                                                                |
|--------------------------------------------------------|-------------------------|-----------------|--------------------------------------------------------------------------------------------------------------------------------------------------------------------------------------------------------------------------------------------------------------------------------------------------------------------------------------------------------------------------------------------------------------------------------------------------------------------------------|
| REACTOME_FCERI_MEDIATED_NF_KB_ACTIVATION               | 2.6<br>195<br>977<br>68 | 0.0200<br>71884 | IGHE/IGHV4-59/IGHV1-2/IGKV5-2/IGKV1-39/IGHV1-46/IGKV2-30/IGKV2D-30/IGHV2-70/IGKV3-15/IGLV3-25/IGHV4-34/IGKV1-16/IGLV3-21/IGLV1-47/IGLV2-23/IGLV1-44/IGLV3-1/IGHV3-33/IGLV2-14/IGHV3-11/IGKV1D-16/IGHV3-30/IGLV3-19/IGHV2-5/IGLV1-40/IGLC2/IGKV1D-12/IGKV1-5/IGKV2D-28/IGHV3-23/IGKV3-11/IGKV1D-39/IGLV2-8/IGLV2-11/IGLV7-43/IGKV4-1/IGHV1-69/IGLV1-51/IGHV4-39/IGLV6-57/RASGRP4/IGKV3-20/NFKB1/IGHV3-7/LYN/FCER1G/CARD11/IGKV1-17/IGHV3-48/IGHV3-53/MALT1/IGKV1-12             |
| REACTOME_SYNDECAN_INTERACTIONS                         | 2.6<br>039<br>324<br>05 | 0.0198<br>64398 | THBS1/COL1A1/COL1A2/COL5A1/COL3A1/SDC1/ITGA2/COL5A2/FN1/ACTN1/TNC/ITGB4/ITGB3/COL5A3/TGFB1/ITGB1/ITGB5                                                                                                                                                                                                                                                                                                                                                                         |
| KEGG_CHEMOKINE_SIGNALING_PATHWAY                       | 2.6<br>025<br>746<br>32 | 0.0239<br>07265 | CCL13/CCL11/CCL20/CXCL13/CCL18/XCR1/CXCL5/CCR8/CCL7/GNGT1/CCR2/CCR4/CXCR3/PPBP/CXCR1/CXCL8/CXCL3/CCL23/CXCL1/ITK/CCL2/CXCL2/CCL22/SHC1/JAK3/CXCR5/CCR7/CCR5/CCR6/CXCL6/CXCL9/CCR1/PF4V1/PIK3CG/CCR3/ADCY7/CXCR2/DOCK2/CXCR6/CCL26/PIK3CD/CXCL12/PIK3R5/CCL14/RAC2/CCL5/VAV1/CCL24/PLCB2/CCL8/WAS/HCK/XCL2/VAV2/NCF1/NFKB1/CXCL10/ADCY3/STAT3/STAT2/PRKCD/LYN/PXN/GRK5/NFKBIA/ADCY4/XCL1/PF4/ROCK1/CXCL16/ROCK2/FOXO3/ADCY6/PLCB3/FGR                                           |
| REACTOME_PD_1_SIGNALING                                | 2.5<br>962<br>534<br>36 | 0.0198<br>64398 | TRAV29DV5/CD3E/TRAV8-4/TRAV19/LCK/CD3G/TRBV7-9/CD274/PDCD1LG2/TRBV12-3/HLA-DQA1/CD4/HLA-DQB2/HLA-DQA2/HLA-DQB1/PDCD1/HLA-DPA1/CD3D/CD247/HLA-DRB1/PTPN6/HLA-DPB1                                                                                                                                                                                                                                                                                                               |
| NABA_ECM_GLYCOPROTEINS                                 | 2.5<br>945<br>676<br>01 | 0.0239<br>07265 | THBS1/DPT/PCOLCE/POSTN/AMBN/MXRA5/SBSPON/CCN1/MFAP2/VIT/LAMB1/MFAP5/LAMA3/TGFB1/FBLN1/FNDC1/TNXB/FBN1/EMILIN1/SPON2/LTBP2/SNED1/LTBP1/LAMA2/SVEP1/SRPX2/FN1/LRG1/PXDNL/FBLN7/NPNT/PAPLN/LAMC1/FBN2/IBSP/AEBP1/PXDN/FBLN5/TNC/ZPLD1/IGFBP6/LAMC2/ELN/COMP/SMOC2/IGFBP3/NID1/CRISPLD2/CCN4/THBS3/FBLN2/EFEMP1/IGFBP4/LAMA4/LTBP3/HMCN2/LAMA1/EGFLAM/NID2/SRPX/NDNF/SLIT3/CTHRC1/ECM1/CCN2/TNN/HMCN1/MFAP4/CRIM1/LAMB2/GAS6/LAMA5/ZP4/FGG/TSKU/THBS2/DMBT1/EFEMP2/SLIT2/VWF/LAMC3 |
| WP_PHOTODYNAMIC_THERAPYINDUCED_NFKB_SURVIVAL_SIGNALING | 2.5<br>940<br>450<br>29 | 0.0198<br>64398 | CSF2/PTGS2/MMP1/IL6/CXCL8/ICAM1/SELE/CXCL2/BIRC3/RELB/VCAM1/NFKB2/REL/MMP9/IL1B/MMP3/CD40LG/BCL2A1/VEGFA/IL1A/NFKB1/CFLAR/TNFRSF1A                                                                                                                                                                                                                                                                                                                                             |
| WP_TCELL_ANTIGEN_RECEPTOR_TCR_SIGNALING_PATHWAY        | 2.5<br>922<br>039<br>55 | 0.0198<br>64398 | IL6/ICOS/ITK/CD3E/TNFRSF9/GRAP2/SHC1/CCR5/LCK/GATA3/CD3G/MAP3K8/IL15RA/REL/FYB1/CD28/ZAP70/LCP2/FOS/IL1B/IRF4/CD4/VAV1/TGFB1/SH2B3/WAS/NFATC2/MAP4K1/IL1A/MAP3K14/CD3D/NFKB1/CD247/PRKCD/JUN/CARD11/VIM/PSTPIP1/MALT1/SKAP1/NFKBIA/NFATC1/CD83/CD8A                                                                                                                                                                                                                            |



|                                                                          |                         |                 |                                                                                                                                                                                                                                                                                                                         |
|--------------------------------------------------------------------------|-------------------------|-----------------|-------------------------------------------------------------------------------------------------------------------------------------------------------------------------------------------------------------------------------------------------------------------------------------------------------------------------|
| PID_AVB3_INTEGRIN_PATHWAY                                                | 2.5<br>789<br>317<br>86 | 0.0198<br>64398 | COL6A3/COL1A1/COL1A2/COL5A1/COL6A2/COL12A1/COL13A1/COL14A1/COL3A1/COL8A1/COL6A1/SDC1/COL5A2/COL15A1/FN1/ADGRA2/COL8A2/COL7A1/TGFBR2/ITGB3/COL4A1/VCL/COL10A1/CSF1R/TLN1/CSF1/VEGFA/IRS1/CASP8/PXN/F11R/ROCK1/COL16A1/SPP1                                                                                               |
| WP_MIRNAS_INVOLVEMENT_IN_THE_IMMUNE_RESPONSE_IN_SEPSIS                   | 2.5<br>773<br>809<br>85 | 0.0198<br>64398 | IL6/CXCL8/ICAM1/LCN2/MIR149/TLR8/MIR199A1/MIR146B/RELB/VCAM1/IL10/NFKB2/REL/ELANE/TLR7/MIR126/IL1A/IRF1/GZMB/NFKB1/MYD88/MIR200B/NFKBIA/TRAF3/MIR106B/IRF7/MIR199A2/IRF5/TRAF6/TLR4/MIR155HG/MAPK14/IRAK1                                                                                                               |
| KEGG_TOLL_LIKE_RECEPTOR_SIGNALING_PATHWAY                                | 2.5<br>616<br>956<br>24 | 0.0198<br>64398 | LBP/IL6/CXCL8/TLR8/CXCL9/TICAM2/PIK3CG/TLR6/MAPK13/TLR2/MAP3K8/CD80/TLR5/PIK3CD/CD14/TLR9/PIK3R5/TLR1/FOS/IL1B/CCL5/IL12B/TLR7/TICAM1/IKBKE/CTSK/NFKB1/CXCL10/CASP8/MYD88/CD40/RIPK1/JUN/NFKBIA/TRAF3/LY96/IFNA5/SPP1/IFNA14/MAP2K3/IRF7/IFNAR1/CD86/IRF5/TRAF6/TLR3/TLR4/MAPK14/TIRAP/IRAK1                            |
| WP_ALLOGRAFT_REJECTION                                                   | 2.5<br>616<br>787<br>88 | 0.0198<br>64398 | CXCL13/COL5A1/IL2RA/CXCL8/FASLG/CXCR5/CXCL9/CTLA4/FOXP3/IL22/C3/PRF1/IFNG/IL10/CD80/HLA-DQA1/CD28/CXCL12/HLA-DOA/IL1B/IL12B/TGFB1/HLA-DQA2/HLA-DQB1/CD40LG/VEGFA/C5/C7/IL1A/AGTR1/GZMB/C1QC/HLA-DPA1/C1QA/HLA-C/C1QB/CASP8/CD40/HLA-B/C2/CASP7/VIM/HLA-DRB1/C8A/HLA-F/MICA/HLA-DPB1/HLA-E/CD55/C4A/CD86/FAS/HLA-DMA/C4B |
| WP_SELECTIVE_EXPRESSION_OF_CHEMOKINE_RECEPTORS_DURING_TCELL_POLARIZATION | 2.5<br>588<br>672<br>53 | 0.0198<br>64398 | CSF2/CCR2/CCR4/CXCR3/IL18R1/CCR7/CCR5/IL4R/CCR1/TGFB2/CCR3/IFNG/CD28/CD4/IL12B/TGFB1/CD40LG/TGFB3/IL12RB1                                                                                                                                                                                                               |
| REACTOME_NON_INTEGRIN_MEMBRANE_ECM_INTERACTIONS                          | 2.5<br>487<br>075<br>39 | 0.0198<br>64398 | THBS1/COL1A1/COL1A2/COL5A1/COL3A1/LAMB1/LAMA3/SDC1/ITGA2/COL5A2/LAMA2/FN1/LAMC1/HSPG2/ACTN1/TNC/ITGB4/LAMC2/ITGB3/COL4A1/COL4A2/LAMA4/LAMA1/COL10A1/COL5A3/TGFB1/ITGB1/ITGB5/LAMB2/LAMA5                                                                                                                                |
| WP_TOLLLIKE_RECEPTOR_SIGNALING_PATHWAY                                   | 2.5<br>453<br>248<br>4  | 0.0198<br>64398 | LBP/IL6/CXCL8/TLR8/CXCL9/TICAM2/PIK3CG/TLR6/MAPK13/TLR2/MAP3K8/CD80/TLR5/PIK3CD/CD14/TLR9/PIK3R5/TLR1/FOS/IL1B/CCL5/IL12B/TLR7/TICAM1/IKBKE/NFKB1/CXCL10/CASP8/MYD88/CD40/RIPK1/JUN/NFKBIA/TRAF3/LY96/IFNA5/SPP1/IFNA14/MAP2K3/IRF7/IFNAR1/CD86/IRF5/TRAF6/TLR3/TLR4/MAPK14/TIRAP/IRAK1                                 |
| NABA_BASEMENT_MEMBRANES                                                  | 2.5<br>434<br>322<br>21 | 0.0198<br>64398 | COL6A5/COL6A3/COL6A2/LAMB1/COL6A1/LAMA3/COL15A1/LAMA2/NPNT/PAPLN/LAMC1/HSPG2/LAMC2/NID1/COL4A1/COL4A2/LAMA4/LAMA1/COL18A1/NID2/HMCN1/LAMB2/LAMA5                                                                                                                                                                        |

|                                                        |                         |                 |                                                                                                                                                                                                                                                                                                                                              |
|--------------------------------------------------------|-------------------------|-----------------|----------------------------------------------------------------------------------------------------------------------------------------------------------------------------------------------------------------------------------------------------------------------------------------------------------------------------------------------|
| KEGG_GRAFT_VERSUS_HOST_DISEASE                         | 2.5<br>414<br>895<br>03 | 0.0198<br>64398 | IL6/FASLG/KIR2DL1/PRF1/IFNG/CD80/HLA-DQA1/CD28/HLA-DOA/IL1B/HLA-DQA2/HLA-DQB1/IL1A/GZMB/HLA-DPA1/HLA-C/KIR3DL2/HLA-B/HLA-DRB1/KIR3DL1/HLA-F/HLA-DPB1/KLRD1/HLA-E/CD86/FAS/HLA-DMA/KIR2DL3/HLA-DOB/HLA-G                                                                                                                                      |
| PID_IL12_2PATHWAY                                      | 2.5<br>367<br>843<br>71 | 0.0198<br>64398 | IL2RA/IL1R1/NOS2/FASLG/IL18R1/IL2RB/EOMES/CD3E/CCR5/LCK/CD3G/IL2RG/IFNG/RELB/NFKB2/STAT6/IL18RAP/HLX/FOS/IL1B/CD4/IL12B/GADD45B/STAT5A/SOCS1/GZMA/GZMB/CD3D/NFKB1/STAT3/CD247/IL12RB1/CD8A/TYK2/MAP2K3                                                                                                                                       |
| REACTOME_LAMININ_INTERACTIONS                          | 2.5<br>345<br>680<br>71 | 0.0198<br>64398 | LAMB1/LAMA3/ITGA2/LAMA2/LAMC1/HSPG2/COL7A1/ITGA3/ITGB4/LAMC2/NID1/COL4A1/COL4A2/LAMA4/LAMA1/COL18A1/NID2/ITGB1/LAMB2/LAMA5/ITGA1/LAMC3/ITGA7                                                                                                                                                                                                 |
| PID_INTEGRIN_A9B1_PATHWAY                              | 2.5<br>329<br>762<br>68 | 0.0198<br>64398 | CSF2/F13A1/KCNJ15/ADAM12/NOS2/ADAM8/FN1/TNC/TGM2/VCAM1/VEGFC/ITGB1/VEGFA/PXN/ITGA9/SPP1/SAT1                                                                                                                                                                                                                                                 |
| REACTOME_GENERATION_OF_SECOND_MESSENGER_MOLECULES      | 2.5<br>199<br>593<br>15 | 0.0198<br>64398 | ITK/TRAV29DV5/CD3E/TRAV8-4/GRAP2/TRAV19/LCK/CD3G/TRBV7-9/TRBV12-3/HLA-DQA1/FYB1/ZAP70/LCP2/CD4/HLA-DQB2/HLA-DQA2/HLA-DQB1/WAS/PLCG2/HLA-DPA1/CD3D/CD247/VASP/HLA-DRB1/HLA-DPB1                                                                                                                                                               |
| WP_THYMIC_STROMAL_LYMPHOPOIETIN_TSLP_SIGNALING_PATHWAY | 2.5<br>061<br>266<br>88 | 0.0198<br>64398 | CCL11/IL6/IL2RA/CXCL8/IL7R/CISH/TSLP/TNFSF4/TEC/LCK/RELB/FES/NFKB2/STAT6/CRLF2/STAT5A/HCK/NFKB1/STAT3/LYN                                                                                                                                                                                                                                    |
| WP_CANCER_IMMUNOTHERAPY_BY_PD1_BLOCKADE                | 2.5<br>022<br>223<br>29 | 0.0198<br>64398 | CD3E/LCK/CD3G/CD274/PDCD1LG2/IFNG/NFATC4/BATF/ZAP70/NFATC2/PDCD1/CD3D/NFKB1/STAT3/JUN/HLA-DRB1/NFATC1/CD8A/NFAT5/NFATC3                                                                                                                                                                                                                      |
| WP_EBOLA_VIRUS_PATHWAY_ON_HOST                         | 2.5<br>001<br>393<br>94 | 0.0198<br>64398 | CD209/CLEC10A/TIMD4/ITGA2/CLEC6A/ITGA4/SOCS3/ITGA3/ACTN1/ITGA5/ITGB3/IQGAP1/RELB/PIK3CD/FLNA/HLA-DQA1/NFKB2/REL/CTSB/SCIN/HLA-DOA/HLA-DQB2/ICAM3/HLA-DQA2/HLA-DQB1/ITGB1/CAV1/GAS6/IKBKE/VAV2/ITGA1/CTSL/MERTK/HLA-DPA1/NFKB1/HLA-C/ACTN4/HLA-B/AXL/HLA-DRB1/DDX58/CLEC4M/HLA-F/HLA-DPB1/NPC2/EP300/HLA-E/HAVCR1/IRF7/RASA2/HAVCR2/NPC1/HLA- |

|                                                                        |                         |                 |                                                                                                                                                                                                                    |
|------------------------------------------------------------------------|-------------------------|-----------------|--------------------------------------------------------------------------------------------------------------------------------------------------------------------------------------------------------------------|
|                                                                        |                         |                 | DMA/TLR4/CD300A/ADAM17/IGF1R/HLA-DOB/HLA-G/STAT1/ITGAV/BST2/HLA-DRA/AKT1/VPS18/CREBBP/NEDD4/GSN                                                                                                                    |
| BIOCARTA_NKT_PATHWAY                                                   | 2.4<br>974<br>929<br>49 | 0.0198<br>64398 | CSF2/CCR4/CXCR3/IL18R1/CCR7/CCR5/IL4R/CCR1/TGFB2/CCR3/IFNG/CD28/CD4/TGFB1/CD40LG/TGFB3/IL12RB1                                                                                                                     |
| KEGG_NOD_LIKE_RECEPTOR_SIGNALING_PATHWAY                               | 2.4<br>913<br>852<br>49 | 0.0198<br>64398 | CCL13/CCL11/CCL7/IL6/CXCL8/CXCL1/TNFAIP3/MEFV/CCL2/CXCL2/BIRC3/NOD2/MAPK13/NAIP/IL1B/CCL5/CASP5/NLRC4/CCL8/NLRP3/CARD6/NFKB1/CASP8/TRIP6/CARD9/PSTPIP1/CASP1                                                       |
| REACTOME_MOLECULES_ASSOCIATED_WITH_ELASTIC_FIBRES                      | 2.4<br>819<br>990<br>85 | 0.0198<br>64398 | MFAP2/MFAP5/FBLN1/FBN1/EMILIN1/LTBP2/LTBP1/FN1/FBN2/FBLN5/ELN/ITGB3/FBLN2/EFEMP1/TGFB2/LTBP3/GDF5/MFAP4/TGFB1/ITGB1/ITGB5/EFEMP2/TGFB3                                                                             |
| WP_TYPE_II_INTERFERON_SIGNALING_IFNG                                   | 2.4<br>786<br>065<br>21 | 0.0198<br>64398 | REG1A/ICAM1/NOS2/SOCS3/CIITA/CXCL9/CYBB/IFNG/IL1B/IRF4/SOCS1/IRF1/CXCL10/STAT2/HLA-B/SPI1/PRKCD/GBP1/TAP1/JAK2/IRF8/OAS1/IRF9/IRF2/STAT1/IFNB1                                                                     |
| KEGG_INTESTINAL_IMMUNE_NETWORK_FOR_IGA_PRODUCTION                      | 2.4<br>605<br>851<br>56 | 0.0198<br>64398 | IL6/ICOS/ITGA4/IL15RA/IL10/CD80/HLA-DQA1/CD28/CXCL12/TNFRSF17/HLA-DOA/ITGB7/TGFB1/HLA-DQA2/HLA-DQB1/CD40LG/IL15/MAP3K14/TNFRSF13B/HLA-DPA1/TNFSF13/CD40/LTBR/HLA-DRB1/HLA-DPB1/CD86/HLA-DMA/CXCR4/HLA-DOB/TNFSF13B |
| PID_IL4_2PATHWAY                                                       | 2.4<br>601<br>869<br>03 | 0.0198<br>64398 | CCL11/COL1A1/IGHE/COL1A2/IGHG1/SELP/SHC1/SOCS3/TFF3/JAK3/IL2RG/IGHG3/IL4R/ITGB3/DOK2/EGR2/CEBPB/IL10/CCL26/FES/STAT6/ARG1/IRF4/STAT5A/CD40LG/SOCS1/PARP14/IL13RA1/IRS1/IRS2/SPI1/SP1/PTPN6                         |
| WP_TYPE_I_COLLAGEN_SYNTHESIS_IN_THE_CONTEXT_OF_OSTEOGENESIS_IMPERFECTA | 2.4<br>596<br>794<br>3  | 0.0198<br>64398 | COL1A1/COL1A2/LOX/FZD1/ADAMTS2/TNFSF11/TNFRSF11A/P4HA2/SERPINH1/COLGALT1/CREB3L1/BMP1/PLOD2/SERPINF1/P3H1/PLOD1/P3H2/P4HB/FKBP10/P4HA1/IFITM5/TNFRSF11B/WNT1/LRP5                                                  |
| WP_TOLLLIKE_RECEPTOR_SIGNALING_RELATED_TO_MYD88                        | 2.4<br>549              | 0.0198<br>64398 | TLR8/TICAM2/TLR6/TLR2/RELB/TLR5/NFKB2/REL/TLR9/TLR1/TLR7/TICAM1/IKBKE/NFKB1/MYD88/TRAF3/IRF7/TRAF6/TLR3/TLR4/TIRAP/IRAK1                                                                                           |

|                                                      |                         |                 |                                                                                                                                                                                                                                                                                                                                                                                                                                                                                                                                                                                                                                                                                                                                                |
|------------------------------------------------------|-------------------------|-----------------|------------------------------------------------------------------------------------------------------------------------------------------------------------------------------------------------------------------------------------------------------------------------------------------------------------------------------------------------------------------------------------------------------------------------------------------------------------------------------------------------------------------------------------------------------------------------------------------------------------------------------------------------------------------------------------------------------------------------------------------------|
|                                                      | 794<br>75               |                 |                                                                                                                                                                                                                                                                                                                                                                                                                                                                                                                                                                                                                                                                                                                                                |
| WP_REGULATION_OF_TOLLLIKE_RECEPTOR_SIGNALING_PATHWAY | 2.4<br>471<br>716<br>23 | 0.0199<br>95966 | LBP/IL6/CXCL8/TNFAIP3/CISH/TREM1/TLR8/CXCL9/TICAM2/PIK3CG/TLR6/MAPK13/TLR2/MAP3K8/CD80/TLR5/PIK3CD/NFKB2/CD14/TLR9/PIK3R5/TLR1/FOS/IL1B/CCL5/IL12B/IRAK3/TLR7/SYK/SOCS1/TICAM1/IKBKE/CD180/IRAK2/NFKB1/CXCL10/CASP8/MYD88/CD40/RIPK1/TIFA/JUN/PTPN6/NFKBIA/TRAF3/LY96/RNF31/RNF216/IFNA5/SPP1/IFNA14/MAP2K3/IRF7/IFNAR1/CD86/IRF5/TRAF6/TLR3/TLR4/MAPK14/TIRAP/IRAK1/SQSTM1/BTK/TAB3/STAT1/IFNB1/IKBKB                                                                                                                                                                                                                                                                                                                                         |
| PID_IL6_7_PATHWAY                                    | 2.4<br>466<br>315<br>54 | 0.0198<br>64398 | LBP/IL6/TNFSF11/SOCS3/TIMP1/A2M/CEBPB/JUNB/IL6R/CEBPD/FOS/VAV1/HCK/FGG/IRF1/MCL1/STAT3/FOXO1/PRKCD/JUN/CRP/TYK2/JAK2/PIAS3/MAPK14/HSP90B1/STAT1/AKT1/PTPRE/IL6ST/PIK3CA/PIAS1/SOS1                                                                                                                                                                                                                                                                                                                                                                                                                                                                                                                                                             |
| PID_TCR_PATHWAY                                      | 2.4<br>407<br>105<br>55 | 0.0198<br>64398 | ITK/CD3E/GRAP2/SHC1/LCK/CD3G/PTPRC/SLA2/MAP3K8/CD80/RASSF5/FLNA/FYB1/CD28/ZAP70/LCP2/CD4/VAV1/WAS/MAP4K1/MAP3K14/CD3D/CD247/CARD11/MALT1/PTPN6/RASGRP1/PLCG1/CD86/TRAF6/SH3BP2/CBL/ORAI1/LAT/BCL10/IKBKB/DBNL/STIM1/HLA-DRA/AKT1/RASGRP2/PTEN                                                                                                                                                                                                                                                                                                                                                                                                                                                                                                  |
| WP_IL18_SIGNALING_PATHWAY                            | 2.4<br>376<br>620<br>84 | 0.0295<br>61976 | CCL20/COL1A1/CCL18/COL1A2/PTGS2/MMP1/IL6/IL2RA/HCAR2/COL3A1/CXCL8/CXCL3/MMP13/ICAM1/NFKBIZ/TNFAIP2/NOS2/FASLG/TNFAIP3/IL18R1/ZC3H12A/PTX3/MMP14/ACOD1/TNFSF11/FN1/CLDN4/CCL2/CXCL2/BIRC3/SOCS3/MMP8/RUNX2/TNIP3/LCK/LTB/IER3/TIMP1/TICAM2/CCN4/IFNG/TGM2/NFATC4/CEBPB/CLDN1/IL10/S1PR4/PTPN7/NFKB2/REL/IL18RAP/MMP9/NCF2/NR4A1/ARG1/PPP1R13L/IL37/FOS/IL1B/CCL5/IL12B/CLDN3/MMP3/CD36/PLOD3/GRN/VEGFA/SLC4A7/IRF1/NCF1/TRAF1/HMOX1/NFKB1/CCDC9/TRPC2/CASP8/MYD88/PRKCD/JUN/BAZ1B/CFLAR/ARF6/TNFRSF1A/SP1/ACACB/ACTA2/IRF6/NFKBIA/IL18BP/CD83/CXCL16/SPP1/UGGT1/RGS16/LRRFIP1/HSPB1/PLCG1/TRPM7/KITLG/TRAF6/ATF3/FAS/SEMA6D/MEF2A/SDC4/PLA2G7/ZDHHC7/FOXN3/FAM186B/ACTA1/ZBTB7A/IRAK1/ITGA2B/TP53/GATA1/ULBP2/PIGT/RASA3/TNFRSF11B/IL17RC/TIMP3 |
| KEGG_COMPLEMENT_AND_COAGULATION_CASCADES             | 2.4<br>204<br>822<br>95 | 0.0198<br>64398 | CR1/F13A1/BDKRB1/SERPINE1/BDKRB2/CFB/C1R/THBD/CR2/SERPINA1/CFI/C5AR1/PLAUR/C1S/CFH/C4BPB/A2M/C3/SERPING1/PROS1/PLAU/C3AR1/F3/C5/FGG/C7/F11/C1QC/C1QA/C1QB/CFD/C2/VWF/F2R                                                                                                                                                                                                                                                                                                                                                                                                                                                                                                                                                                       |
| REACTOME_INTERFERON_ALPHA_BETA_SIGNALING             | 2.4<br>185<br>426<br>54 | 0.0198<br>64398 | SOCS3/EGR1/XAF1/OAS3/MX2/IRF4/SOCS1/HLA-H/MX1/IFITM2/GBP2/IRF1/HLA-C/STAT2/HLA-B/SAMHD1/IFITM1/OAS2/IFITM3/PTPN6/IRF6/HLA-F/OASL/IFNA5/IFNA14/TYK2/HLA-E/IRF7/IRF8/IFNAR1/OAS1/IRF5/RSAD2/RNASEL/ADAR/IRF9/HLA-G/IRF2/STAT1/USP18/IFNB1/PTPN1/BST2/ISG20/IFNA17                                                                                                                                                                                                                                                                                                                                                                                                                                                                                |

|                                                   |                         |                 |                                                                                                                                                                                                                                                                                                                                                                                                                                                                                                                                                                                                                                                                                            |
|---------------------------------------------------|-------------------------|-----------------|--------------------------------------------------------------------------------------------------------------------------------------------------------------------------------------------------------------------------------------------------------------------------------------------------------------------------------------------------------------------------------------------------------------------------------------------------------------------------------------------------------------------------------------------------------------------------------------------------------------------------------------------------------------------------------------------|
| PID_IL23_PATHWAY                                  | 2.4<br>180<br>085<br>23 | 0.0198<br>64398 | IL6/CXCL1/NOS2/IL18R1/IL24/IL19/CCL2/CD3E/SOCS3/ITGA3/CXCL9/IFNG/IL18RAP/IL1B/CD4/IL12B/STAT5A/NFKB1/STAT3/IL12RB1/NFKBIA/TYK2/JAK2/IL23A                                                                                                                                                                                                                                                                                                                                                                                                                                                                                                                                                  |
| WP_CYTOKINES_AND_INFLAMMATORY_RESPONSE            | 2.4<br>049<br>945<br>49 | 0.0198<br>64398 | CSF2/CSF3/IL6/CXCL1/IL11/CXCL2/IFNG/IL10/IL1B/CD4/IL12B/TGFB1/CSF1/IL15/IL1A                                                                                                                                                                                                                                                                                                                                                                                                                                                                                                                                                                                                               |
| NABA_ECM_REGULATORS                               | 2.4<br>036<br>002<br>45 | 0.0261<br>1674  | PAPPA/F13A1/MMP1/PI3/LOX/SERPINE1/FAM20A/CPN2/LOXL4/LOXL1/MMP10/MMP13/ADAM12/CTSG/MMP7/P4HA3/ADAMTS1/HTRA4/FAM20C/ADAMTS2/MMP14/ADAM8/ADAM19/CD109/HTRA3/CTSZ/SERPINA1/MMP19/ADAMTS14/MMP8/PCSK5/SERPINB2/PAPPA2/ADAMTS3/LOXL2/ADAMTSL4/ADAMTS12/ADAMTSL1/SERPINA9/TIMP1/P4HA2/A2M/AMBP/CST7/SERPING1/CTSC/MMP11/TGM2/SERPINH1/MMP12/MMP9/ADAMTS9/SLPI/HABP2/SULF1/CTSB/ADAM9/PLAU/BMP1/PLOD2/ELANE/MMP3/SERPINF1/P3H3/ADAMTSL5/ST14/HPSE/CSTA/CTSS/SERPINA3/PLOD3/ADAMTS16/MMP25/CTSW/P3H1/LOXL3/CTSK/CTSL/CTSA/SERPINB4/CST6/ADAM28/PLOD1/KAZALD1/P3H2/SERPINB9/PAMR1/MMP23B/SERPINB5/PRSS2/TGM5/ADAMTS4/SERPINB8/CTSD/ADAM10/ADAMTS13/MMP27/PZP/ADAM33/SERPINB13/ADAMTS7/P4HA1/SERPINB7 |
| KEGG_FOCAL_ADHESION                               | 2.4<br>021<br>624<br>17 | 0.0239<br>69653 | COL6A3/THBS1/COL1A1/COL1A2/COL5A1/COL6A2/MYL10/COL3A1/LAMB1/COL6A1/LAMA3/TNXB/ITGA2/MET/COL5A2/LAMA2/ITGA11/FN1/BIRC3/SHC1/ITGA4/LAMC1/IBSP/ITGA3/ACTN1/TNC/ITGB4/LAMC2/COMP/ITGA5/ITGB3/COL4A1/COL4A2/PIK3CG/ITGA10/THBS3/ERBB2/LAMA4/LAMA1/PIK3CD/FLNA/VCL/VEGFC/PIK3R5/COL5A3/RAC2/VAV1/TNN/ITGB7/EGF/MYL7/ITGB1/CAV1/ITGB5/LAMB2/ZYX/PDGFRB/TLN1/LAMA5/MYL9/FLT4/VEGFA/VAV2/ITGA1/THBS2/ACTN4/VWF/LAMC3/JUN/FLT1/PARVG/PXN/ITGA7/VASP/PDGFD                                                                                                                                                                                                                                            |
| WP_FIBRIN_COMPLEMENT_RECEPTOR_3_SIGNALING_PATHWAY | 2.3<br>956<br>937<br>16 | 0.0198<br>64398 | LBP/IL6/CXCL3/NOS2/CCL2/ITGAM/TICAM2/RASSF5/ITGB2/CD14/IL12B/SYK/TICAM1/FGG/IRAK2/NFKB1/CXCL10/MYD88/LY96/TRAF6/TLR3/TLR4/TIRAP/IRAK1                                                                                                                                                                                                                                                                                                                                                                                                                                                                                                                                                      |
| REACTOME_COSTIMULATION_BY_THE_CD28_FAMILY         | 2.3<br>921<br>231<br>48 | 0.0198<br>64398 | ICOS/TRAV29DV5/CD3E/TRAV8-4/GRAP2/TRAV19/LCK/CD3G/CTLA4/TRBV7-9/CD274/PDCD1LG2/MAP3K8/CD80/TRBV12-3/HLA-DQA1/CD28/CD4/VAV1/HLA-DQB2/HLA-DQA2/HLA-DQB1/TNFRSF14/MAP3K14/PDCD1/HLA-DPA1/CD3D/CD247/LYN/HLA-DRB1/PTPN6/HLA-DPB1/PRR5                                                                                                                                                                                                                                                                                                                                                                                                                                                          |
| KEGG_ALLOGRAFT_REJECTION                          | 2.3<br>891<br>023<br>18 | 0.0198<br>64398 | FASLG/PRF1/IFNG/IL10/CD80/HLA-DQA1/CD28/HLA-DOA/IL12B/HLA-DQA2/HLA-DQB1/CD40LG/GZMB/HLA-DPA1/HLA-C/CD40/HLA-B/HLA-DRB1/HLA-F/HLA-DPB1/HLA-E/CD86/FAS/HLA-DMA/HLA-DOB/HLA-G                                                                                                                                                                                                                                                                                                                                                                                                                                                                                                                 |

|                                                                                                                                               |                         |                 |                                                                                                                                                                                                                                                                                                                                                        |
|-----------------------------------------------------------------------------------------------------------------------------------------------|-------------------------|-----------------|--------------------------------------------------------------------------------------------------------------------------------------------------------------------------------------------------------------------------------------------------------------------------------------------------------------------------------------------------------|
| WP_LUNG_FIBROSIS                                                                                                                              | 2.3<br>871<br>309<br>77 | 0.0198<br>64398 | CCL11/CSF2/CSF3/IL6/CCR2/CXCL8/PTX3/CCL2/CXCL2/SERPINA1/CMA1/ELN/TIMP1/CCR3/CEBPB/MMP9/P<br>LAU/CCN2/IL1B/CCL5/IL12B/TGFB1/EGF/ATP11A/HMOX1/CALCA/HGF/RTEL1/SPP1/DPP9/PDGFA/SFTPA1/T<br>ERT                                                                                                                                                            |
| PID_INTEGRIN3_PATHWAY                                                                                                                         | 2.3<br>732<br>746<br>05 | 0.0198<br>64398 | THBS1/COL1A1/COL1A2/CCN1/LAMB1/TGFB1/FBN1/SDC1/FN1/LAMC1/PLAUR/IBSP/TNC/TGFBR2/ITGB3/COL<br>4A1/LAMA4/PLAU/PDGFRB/VEGFA/FGG/PVR                                                                                                                                                                                                                        |
| WP_SENESCENCE_AND_AUTOPHAGY_IN_CANCE<br>R                                                                                                     | 2.3<br>706<br>093<br>7  | 0.0198<br>64398 | THBS1/COL1A1/IL6/SERPINE1/COL3A1/CXCL8/CXCL1/INHBA/IL24/MMP14/FN1/TNFSF15/SERPINB2/IGFBP3/<br>CD44/IFNG/CEBPB/IL6R/COL10A1/MAP1LC3C/PLAU/IL1B/TGFB1/IF116/IL1A/IRF1/CDKN1A/JUN/SMAD3/LAMP<br>1/MAP2K3/IGFBP5/IRF7/IRF5/CXCL14/MAPK14/CDKN2A/RNASEL/SQSTM1/IGF1R/CREG1/TP53                                                                             |
| PID_INTEGRIN2_PATHWAY                                                                                                                         | 2.3<br>683<br>283<br>84 | 0.0198<br>64398 | CCN1/ICAM1/TGFB1/SPON2/PLAUR/ITGAM/FCGR2A/C3/VCAM1/ITGB2/PLAU/ITGAD/ITGAL/ICAM3/CD40LG/F<br>GG/GP1BA/F11R/ITGAX                                                                                                                                                                                                                                        |
| REACTOME_INTERLEUKIN_20_FAMILY_SIGNALIN<br>G                                                                                                  | 2.3<br>624<br>377<br>53 | 0.0198<br>64398 | IL20/IL22RA1/IL24/IL19/IL22RA2/SOCS3/JAK3/IL22/STAT5A/STAT3/STAT2/IFNLR1/TYK2/IL20RB/JAK2/IL10RB                                                                                                                                                                                                                                                       |
| REACTOME_REGULATION_OF_INSULIN_LIKE_GR<br>OWTH_FACTOR_IGF_TRANSPORT_AND_UPTAKE_<br>BY_INSULIN_LIKE_GROWTH_FACTOR_BINDING_P<br>ROTEINS_IGFBPS_ | 2.3<br>509<br>681<br>6  | 0.0198<br>64398 | PAPPA/MMP1/IL6/AMBN/FAM20A/CCN1/LAMB1/FBN1/CTSG/FAM20C/LTBP1/CP/FN1/SERPINA1/APOA2/LAM<br>C1/PAPPA2/TNC/MXRA8/IGFBP6/IGFBP3/APOB/TIMP1/APOL1/KLK13/C3/EVA1A/IGFBP4/MELTF/FSTL1/LAMB<br>2/GAS6/CSF1/FGG/DNAJC3/CDH2/BPIFB2/CALU/KLK1/GZMH/TGOLN2/FSTL3/P4HB/MGAT4A/IGFBP1/ADAM1<br>0/CKAP4/FUCA2/SPP1/SDC2/QSOX1/IGFBP5/APLP2/NUCB1/C4A/PDIA6/DMP1/VCAN |
| WP_TGFBETA_SIGNALING_PATHWAY                                                                                                                  | 2.3<br>503<br>897<br>2  | 0.0198<br>64398 | THBS1/COL1A2/MMP1/FOSB/ITGA2/MET/FN1/SHC1/RUNX2/TNC/ITGB4/DAB2/FOXP3/TGFBR2/NEDD9/CDKN<br>2B/ITGB3/SIK1/YAP1/MMP12/JUNB/FOS/PML/TGFB1/ITGB1/CAV1/MAP4K1/KLF6/CDKN1A/MAPK4/JUN/SKI/S<br>P1/KLF10/KLF11/ROCK1/SMAD3/MAP2K3/TGFB11/EP300/SIN3A/TRAF6/TERT/ATF3/LIMK2/MEF2A/CITED1/M<br>APK14/FOXH1/SMURF1                                                 |
| PID_NFAT_TFPATHWAY                                                                                                                            | 2.3<br>476<br>953<br>5  | 0.0198<br>64398 | CSF2/PTGS2/IL2RA/CXCL8/FASLG/GATA3/CTLA4/FOXP3/EGR1/FOSL1/EGR2/IKZF1/IFNG/EGR3/JUNB/FOS/I<br>RF4/GBP3/CD40LG/NFATC2/JUN/MAF/NFATC1/NFATC3                                                                                                                                                                                                              |

|                                                    |                         |                 |                                                                                                                                                                                                                                                                                                                                                                                                                                                                   |
|----------------------------------------------------|-------------------------|-----------------|-------------------------------------------------------------------------------------------------------------------------------------------------------------------------------------------------------------------------------------------------------------------------------------------------------------------------------------------------------------------------------------------------------------------------------------------------------------------|
| PID_LYMPH_ANGIOGENESIS_PATHWAY                     | 2.3<br>475<br>546<br>1  | 0.0198<br>64398 | COL1A1/COL1A2/ITGA2/FN1/SHC1/ITGA4/ITGA5/VEGFC/ITGB1/FLT4/ITGA1                                                                                                                                                                                                                                                                                                                                                                                                   |
| REACTOME_DISEASES_OF_IMMUNE_SYSTEM                 | 2.3<br>447<br>071<br>69 | 0.0198<br>64398 | TLR6/TLR2/TLR5/NFKB2/CD14/TLR1/CD36/TICAM1/UNC93B1/NFKB1/MYD88/NFKBIA/TRAF3/LY96/TLR3/TLR4/TIRAP/BTK/IKBKB                                                                                                                                                                                                                                                                                                                                                        |
| REACTOME_INTERFERON_GAMMA_SIGNALING                | 2.3<br>443<br>970<br>82 | 0.0198<br>64398 | ICAM1/GBP5/SOCS3/CIITA/CD44/GBP4/OAS3/IFNG/IFI30/VCAM1/HLA-DQA1/TRIM38/PML/IRF4/HLA-DQB2/GBP3/HLA-DQA2/HLA-DQB1/TRIM22/PTAFR/SOCS1/HLA-H/GBP2/IRF1/HLA-DPA1/HLA-C/GBP6/HLA-B/PRKCD/TRIM34/TRIM5/OAS2/GBP1/HLA-DRB1/PTPN6/IRF6/TRIM10/HLA-F/OASL/HLA-DPB1/TRIM14/SP100/TRIM6/HLA-E/PTPN2/IRF7/JAK2/IRF8/OAS1/IRF5/TRIM25/FCGR1A/TRIM45/MID1/CAMK2D/IRF9/HLA-G/IRF2/STAT1/TRIM26/PTPN1/TRIM21/HLA-DRA                                                               |
| WP_IL4_SIGNALING_PATHWAY                           | 2.3<br>443<br>207<br>75 | 0.0198<br>64398 | SHC1/SOCS3/JAK3/GATA3/IL2RG/IL4R/DOK2/CEBPB/PIK3CD/FLNA/FES/STAT6/FOS/HRH1/STAT5A/SOCS1/NPP5D/IRS1/NFKB1/IRS2/STAT3/PTPN6/NFKBIA/TYK2/EP300/JAK2/MAPK14/CBL/STAT1/IKBKB/AKT1/NFIL3                                                                                                                                                                                                                                                                                |
| PID_AP1_PATHWAY                                    | 2.3<br>441<br>455<br>69 | 0.0198<br>64398 | CSF2/COL1A2/MMP1/FOSB/IL6/CXCL8/CCN1/CCL2/FOSL2/NTS/TIMP1/EGR1/FOSL1/IFNG/IL10/JUNB/MMP9/PLAU/FOS/ESR1/DUSP1/TGFB1/NFATC2/TRIP6/JUN/SP1/HIF1A/MAF/NFATC1/BCL2L11/NFATC3/EP300/DMP1/ATF3/CDKN2A/ACTA1                                                                                                                                                                                                                                                              |
| WP_PRIMARY_FOCAL_SEGMENTAL_GLOMERULOSCLEROSIS_FSGS | 2.3<br>417<br>705<br>86 | 0.0198<br>64398 | MME/CR1/DKK1/PLAUR/ITGA3/ITGB4/SYNPO/ITGB3/MYO1E/MYH9/KRT8/CLDN1/CD80/VCL/KIRREL2/TGFB1/UTRN/ITGB1/CD2AP/LAMB2/PODXL/TLN1/LAMA5/WT1/FAT1/CDKN1A/CTSL/CDH2/ACTN4/LIMS1/VIM/PAX2/IRF6/PLCE1/AGRN/PLCG1/PARVA/TLR4/JAG1                                                                                                                                                                                                                                              |
| WP_FOCAL_ADHESION                                  | 2.3<br>412<br>585<br>93 | 0.0239<br>07265 | THBS1/COL1A1/COL1A2/COL6A2/MYL10/LAMB1/LAMA3/TNXB/ITGA2/MET/COL5A2/LAMA2/ITGA11/FN1/BIRC3/SHC1/ITGA4/LAMC1/IBSP/ITGA3/ACTN1/TNC/ITGB4/LAMC2/TXK/COMP/ITGA5/ITGB3/COL4A1/COL4A2/ITGA10/THBS3/ERBB2/LAMA4/LAMA1/PIK3CD/FLNA/VCL/VEGFC/COL5A3/RAC2/VAV1/TNN/ITGB7/EGF/MYL7/ITGB1/CAV1/BLK/ITGB5/LAMB2/ZYX/PDGFRB/TLN1/LAMA5/MYL9/VEGFA/HCK/VAV2/ITGA1/THBS2/ACTN4/VWF/LAMC3/JUN/FLT1/PARVG/PXN/ITGA7/VASP/PDGFD/ROCK1/HGF/ITGA9/SPP1/ROCK2/KDR/FGR/PDGFA/PARVA/LAMB3 |

|                                                                  |                         |                 |                                                                                                                                                                                                                                                                                                                                                                 |
|------------------------------------------------------------------|-------------------------|-----------------|-----------------------------------------------------------------------------------------------------------------------------------------------------------------------------------------------------------------------------------------------------------------------------------------------------------------------------------------------------------------|
| KEGG_PRIMARY_IMMUNODEFICIENCY                                    | 2.3<br>392<br>768<br>1  | 0.0198<br>64398 | ICOS/IL7R/CD3E/JAK3/LCK/CIITA/IL2RG/PTPRC/AIRE/ZAP70/CD4/CD40LG/RAG1/TNFRSF13B/CD3D/CD40/TAP1/CD8A                                                                                                                                                                                                                                                              |
| REACTOME_INTERLEUKIN_2_FAMILY_SIGNALING                          | 2.3<br>374<br>439<br>88 | 0.0198<br>64398 | CSF2/IL2RA/IL21R/IL2RB/CSF2RB/IL9R/SHC1/JAK3/LCK/IL2RG/IL15RA/PIK3CD/STAT5A/SYK/IL15/INPP5D/STAT3/PTPN6/INPPL1/JAK2/HAVCR2                                                                                                                                                                                                                                      |
| WP_CHEMOKINE_SIGNALING_PATHWAY                                   | 2.3<br>353<br>708<br>54 | 0.0223<br>5188  | CCL11/CCL20/CXCL13/XCR1/CXCL5/CCR8/CCL7/GNGT1/CCR2/CCR4/CXCR3/PPBP/CXCL3/ITK/CCL22/SHC1/JAK3/CXCR5/CCR7/CCR6/CXCL9/CCR1/PIK3CG/CCR3/ADCY7/CXCR2/DOCK2/CXCR6/CCL26/PIK3CD/CXCL12/PIK3R5/RAC2/CCL5/VAV1/CCL24/PLCB2/WAS/HCK/VAV2/NCF1/NFKB1/CXCL10/ADCY3/STAT3/STAT2/PRKCD/LYN/PXN/GRK5/NFKBIA/ADCY4/XCL1/PF4/ROCK1/CXCL16/ROCK2/FOXO3/ADCY6/PLCB3/FGR/JAK2/ADCY9 |
| WP_MICROGLIA_PATHOGEN_PHAGOCYTOSIS_PATHWAY                       | 2.3<br>287<br>828<br>39 | 0.0198<br>64398 | TREM1/ITGAM/CYBB/PIK3R6/PIK3CG/ARPC1B/ITGB2/PIK3CD/NCF2/NCKAP1L/SIGLEC7/RAC2/VAV1/SYK/HCK/PLCG2/VAV2/NCF1/C1QC/C1QA/C1QB/LYN/FCER1G/PTPN6                                                                                                                                                                                                                       |
| REACTOME_SIGNALING_BY_PDGF                                       | 2.3<br>277<br>003<br>3  | 0.0198<br>64398 | COL6A5/COL6A3/THBS1/COL5A1/COL6A2/COL3A1/COL6A1/GRB7/COL5A2/COL4A1/COL4A2/THBS3/FURIN/SAT6/COL5A3/STAT5A/PTPN12/PDGFRB/THBS2/STAT3                                                                                                                                                                                                                              |
| WP_TNF_RELATED_WEAK_INDUCER_OF_APOPTOSIS_TWEAK_SIGNALING_PATHWAY | 2.3<br>105<br>723<br>53 | 0.0198<br>64398 | IL6/CCL2/BIRC3/RELB/NFKB2/MMP9/CCL5/TRAF5/MAP3K14/TRIM63/TRAF1/NFKB1/CASP8/CASP7/RIPK1/JUN/NFKBIA/TRAF3                                                                                                                                                                                                                                                         |
| PID_FRA_PATHWAY                                                  | 2.3<br>100<br>805<br>85 | 0.0198<br>64398 | COL1A2/MMP1/IL6/LIF/CXCL8/LAMA3/THBD/CCL2/FOSL2/PLAUR/ITGB4/FOSL1/JUNB/MMP9/PLAU/NFATC2/HMOX1/JUN/NOS3/SP1/NFATC1/NFATC3/EP300                                                                                                                                                                                                                                  |
| BIOCARTA_IL2RB_PATHWAY                                           | 2.3<br>080<br>814<br>16 | 0.0198<br>64398 | IL2RA/IKZF3/FASLG/IL2RB/SHC1/SOCS3/JAK3/IL2RG/PIK3CG/FOS/STAT5A/SYK/SOCS1/IRS1/CFLAR/PTPN6                                                                                                                                                                                                                                                                      |



|                                                      |                         |                 |                                                                                                                                                                                                                                                                                                                                                                 |
|------------------------------------------------------|-------------------------|-----------------|-----------------------------------------------------------------------------------------------------------------------------------------------------------------------------------------------------------------------------------------------------------------------------------------------------------------------------------------------------------------|
| BIOCARTA_INFLAM_PATHWAY                              | 2.3<br>078<br>867<br>67 | 0.0198<br>64398 | CSF2/CSF3/IL6/CXCL8/IL11/TGFB2/IFNG/IL10/CD4/TGFB1/CSF1/IL15/IL1A/TGFB3/HLA-DRB1                                                                                                                                                                                                                                                                                |
| WP_HEPATITIS_C_AND_HEPATOCELLULAR_CAR<br>CINOMA      | 2.3<br>070<br>922<br>31 | 0.0198<br>64398 | PTGS2/MMP1/IL6/CXCR1/CXCL8/NOS2/FASLG/BIRC3/MYOF/CD44/COL4A2/IL6R/LEF1/TGFB1/PODXL/VEGF<br>A/VAV2/CDKN1A/NFKB1/STAT3/CASP7/JUN/HIF1A/SMAD3                                                                                                                                                                                                                      |
| REACTOME_SIGNALING_BY_MET                            | 2.3<br>053<br>576<br>8  | 0.0198<br>64398 | COL1A1/COL1A2/TNS4/COL5A1/COL3A1/LAMB1/LAMA3/ITGA2/MET/COL5A2/LAMA2/FN1/SHC1/LAMC1/ITGA<br>3/COL27A1/LAMC2/SPINT1/COL24A1/LAMA4/LAMA1/COL5A3/ITGB1/LAMB2/LAMA5                                                                                                                                                                                                  |
| PID_P53_DOWNSTREAM_PATHWAY                           | 2.3<br>041<br>256<br>79 | 0.0198<br>92136 | VDR/LIF/SERPINE1/DKK1/FOXA1/MET/HIC1/BDKRB2/SNAI2/TNFRSF10C/EPHA2/STEAP3/PRDM1/TNFRSF10<br>A/IGFBP3/TNFRSF10D/COL18A1/NDRG1/PML/DUSP1/CAV1/NLRC4/BCL2A1/TNFRSF10B/GDF15/RNF144B/C<br>DKN1A/ARID3A/DUSP5/MCL1/TRRAP/SFN/JUN/PLK3/SERPINB5/PERP/CASP1/SH2D1A/AIFM2/CASP10/SP1/T<br>AP1/CTSD/GADD45A/PIDD1/HGF/BCL6/SPP1/EP300/PMAIP1/IRF5/VCAN/ATF3/FAS/PMS2/TP63 |
| PID_CD8_TCR_PATHWAY                                  | 2.3<br>028<br>771<br>35 | 0.0198<br>64398 | CD3E/GRAP2/SHC1/LCK/CD3G/PTPRC/PRF1/MAP3K8/CD80/RASSF5/CD28/ZAP70/LCP2/VAV1/MAP3K14/CD<br>3D/CD247/CARD11/MALT1/PTPN6/CD8A/RASGRP1/PLCG1/CD86/TRAF6/CBL/ORAI1/LAT/BCL10/IKBKB/STIM<br>1/AKT1/RASGRP2                                                                                                                                                            |
| PID_TOLL_ENDOGENOUS_PATHWAY                          | 2.3<br>028<br>638<br>26 | 0.0198<br>64398 | BGN/TLR6/TLR2/S100A8/CD14/S100A9/TLR1/TICAM1/IRAK2/MYD88/LY96/SFTPA1/TLR3/VCAN/TLR4/TIRAP/I<br>RAK1                                                                                                                                                                                                                                                             |
| WP_IL1_AND_MEGAKARYOCYTES_IN_OBESITY                 | 2.3<br>018<br>341<br>22 | 0.0198<br>64398 | IL1R1/ICAM1/CCL2/TIMP1/CCR3/IFNG/TLR2/MMP9/S100A9/TLR1/IL1B/HBEGF/NLRP3/NFKB1/MYD88/F2R                                                                                                                                                                                                                                                                         |
| REACTOME_TNFS_BIND_THEIR_PHYSIOLOGICAL<br>_RECEPTORS | 2.2<br>920<br>143<br>77 | 0.0198<br>64398 | CD70/FASLG/TNFRSF18/TNFSF11/TNFSF14/TNFRSF9/TNFSF4/TNFSF15/TNFRSF1B/CD27/TNFRSF17/TNFS<br>F8/EDA2R/TNFRSF14/TNFRSF8/TNFRSF13B/TNFSF13/TNFRSF1A/TNFRSF4/LTA/TNFRSF11B/TNFSF13B/ED<br>A                                                                                                                                                                           |

|                                                                          |                         |                 |                                                                                                                                                                                                                                                                                                                                                        |
|--------------------------------------------------------------------------|-------------------------|-----------------|--------------------------------------------------------------------------------------------------------------------------------------------------------------------------------------------------------------------------------------------------------------------------------------------------------------------------------------------------------|
| WP_COMPLEMENT_AND_COAGULATION_CASCADES                                   | 2.2<br>910<br>880<br>41 | 0.0198<br>64398 | CR1/BDKRB1/SERPINE1/CFB/C1R/THBD/CR2/SERPINA1/CFI/C5AR1/PLAUR/C1S/CFH/C3/SERPING1/PROS1/PLAU/C3AR1/F3/C7/LMAN1/C1QC/C1QA/C1QB/CFD/C2/VWF/F2R                                                                                                                                                                                                           |
| PID_CD8_TCR_DOWNSTREAM_PATHWAY                                           | 2.2<br>888<br>110<br>43 | 0.0198<br>64398 | IL2RA/FASLG/IL2RB/EOMES/TNFRSF18/CD3E/TNFRSF9/CD3G/IL2RG/EGR1/FOSL1/PRF1/IFNG/PTPN7/JUNB/FOS/NFATC2/GZMB/CD3D/CD247/JUN/NFATC1/CD8A/IFNA5/IFNA14/NFATC3/TNFRSF4/IFNAR1                                                                                                                                                                                 |
| WP_HYPOTHESIZED_PATHWAYS_IN_PATHOGENESIS_OF_CARDIOVASCULAR_DISEASE       | 2.2<br>866<br>334<br>98 | 0.0198<br>64398 | POSTN/SERPINE1/FBN1/LTBP2/LTBP1/SHC1/RUNX2/FBN2/TGFBR2/FLNA/CCN2/ENG/AGTR1/SMAD3/ANGPT2                                                                                                                                                                                                                                                                |
| WP_HOSTPATHOGEN_INTERACTION_OF_HUMAN_CORONA_VIRUSES_INTERFERON_INDUCTION | 2.2<br>733<br>925<br>99 | 0.0198<br>64398 | OAS3/FOS/TLR7/TICAM1/IKKE/NFKB1/STAT2/MYD88/RIPK1/JUN/OAS2/NFKBIA/TRAF3/DDX58/IFIH1/TYK2/IFNAR1/OAS1/MAVS/TRAF6/MAPK14/IRF9/STAT1/IKKBK                                                                                                                                                                                                                |
| WP_ONCOSTATIN_M_SIGNALING_PATHWAY                                        | 2.2<br>708<br>526<br>58 | 0.0198<br>64398 | MMP1/SERPINE1/CCN1/MMP13/CCL2/SHC1/SOCS3/JAK3/OSMR/LDLR/EGR1/CEBPB/JUNB/OSM/FOS/MMP3/VEGFA/IRS1/NFKB1/STAT3/CASP7/PRKCD/PXN/HIF1A/NFKBIA/TYK2/JAK2/PIAS3/MAPK14/TP53/TIMP3/PRKCH/STAT1/AKT1/PTK2B/IL6ST/CDK2                                                                                                                                           |
| WP_ADIPOGENESIS                                                          | 2.2<br>700<br>731<br>58 | 0.0198<br>64398 | DLK1/IL6/LEP/LIF/RETN/SERPINE1/SFRP4/FZD1/PCK1/PRLR/NAMPT/KLF5/SOCS3/PTGIS/GATA3/EGR2/PLIN2/CYP26A1/CEBPB/WWTR1/STAT6/CEBPD/OSM/BMP1/TGFB1/TWIST1/GADD45B/STAT5A/EBF1/SOCS1/EPA/S1/AGPAT2/IRS1/LMNA/NRIP1/KLF6/LPIN3/CDKN1A/PCK2/IRS2/STAT3/STAT2/CFD/FOXO1/KLF7/SP1/RORA/HIF1A/FOXC2/PPARD/GADD45A/SMAD3/LPL/LPIN2/SREBF1/FAS/PNPLA3/MEF2A/UCP1/CELF1 |
| PID_HIF1_TFPATHWAY                                                       | 2.2<br>681<br>208<br>02 | 0.0198<br>64398 | LEP/SERPINE1/NOS2/CP/TF3/BHLHE40/CA9/PLIN2/FURIN/ADM/ITGB2/NDRG1/CXCL12/FOS/ENG/VEGFA/HK2/HDAC7/NT5E/HMOX1/MCL1/CITED2/ARNT/PFKFB3/JUN/SP1/RORA/IGFBP1/HIF1A/SLC2A1/SMAD3/EP300/TERT/PFKL/CXCR4/BHLHE41                                                                                                                                                |
| PID_IL2_1PATHWAY                                                         | 2.2<br>637<br>508<br>32 | 0.0198<br>64398 | IL2RA/IKZF3/IL2RB/CISH/SHC1/SOCS3/JAK3/LCK/IL2RG/DOK2/IFNG/FOS/STAT5A/SYK/SOCS1/IRS1/IRS2/STAT3/JUN                                                                                                                                                                                                                                                    |

|                                                                      |                         |                 |                                                                                                                                                                                     |
|----------------------------------------------------------------------|-------------------------|-----------------|-------------------------------------------------------------------------------------------------------------------------------------------------------------------------------------|
| WP_RANKLRANK_RECEPTOR_ACTIVATOR_OF_NFKB_LIGAND_SIGNALING_PATHWAY     | 2.2<br>607<br>793<br>89 | 0.0198<br>64398 | ICAM1/TNFSF11/TNFRSF11A/FHL2/RELB/VCAM1/NFKB2/FOS/CALCR/TRAF5/SYK/CTSK/TRAF1/NFKB1/PAPSS2/ACP5/SPI1/JUN/LYN/NFKBIA/TRAF3/NFATC1/PLCG1/TRAF6/MAPK14/SQSTM1/CBL/TNFRSF11B/STAT1/IKBKB |
| REACTOME_CROSSLINKING_OF_COLLAGEN_FIBRILS                            | 2.2<br>562<br>625<br>01 | 0.0198<br>64398 | COL1A1/COL1A2/PCOLCE/LOX/LOXL4/LOXL1/PXDN/LOXL2/COL4A1/COL4A2/BMP1/LOXL3                                                                                                            |
| SA_MMP_CYTOKINE_CONNECTION                                           | 2.2<br>537<br>381<br>42 | 0.0198<br>64398 | TNFRSF1B/CD44/TGFB2/FCGR3A/IL6R/IL1B/TNFSF8/TGFB1/SELL/CSF1/SPN/TNFRSF8/ACE/TNFRSF1A                                                                                                |
| PID_TCR_CALCIIUM_PATHWAY                                             | 2.2<br>474<br>683<br>29 | 0.0198<br>64398 | CSF2/PTGS2/IL2RA/FASLG/FOSL1/RCAN1/IFNG/JUNB/FOS/CD40LG/NFATC2/JUN/NFATC1/NFATC3                                                                                                    |
| REACTOME_POTENTIAL_THERAPEUTICS_FOR_SARS                             | 2.2<br>451<br>254<br>66 | 0.0198<br>64398 | IL1R1/ITGA4/JAK3/FURIN/IL6R/TLR9/IL1RAP/TLR7/ITGB1/VEGFA/PDCD1/RIPK1/ATP1A1/CYSLTR1/ROCK1/TYK2/ROCK2/JAK2/IMPDH1/BRD4                                                               |
| PID_SYNDECAN_4_PATHWAY                                               | 2.2<br>425<br>737<br>11 | 0.0198<br>64398 | THBS1/ADAM12/LAMA3/FN1/ACTN1/TNC/FZD7/ITGA5/FGFR1/LAMA1/MMP9/CXCL12/CCL5/ITGB1/TNFRSF13B/PRKCD                                                                                      |
| BIOCARTA_IL1R_PATHWAY                                                | 2.2<br>402<br>559<br>29 | 0.0198<br>64398 | IL6/IL1R1/IL1RN/TGFB2/IL1B/IL1RAP/IRAK3/TGFB1/IL1A/IRAK2/MAP3K14/TGFB3/NFKB1/MYD88/JUN/NFKBIA/MAP2K3/TRAF6/MAPK14/IRAK1/IFNB1/IKBKB                                                 |
| WP_PLATELETMEDIATED_INTERACTIONS_WITH_VASCULAR_AND_CIRCULATING_CELLS | 2.2<br>390<br>773<br>39 | 0.0198<br>64398 | ICAM1/SELE/CCL2/SELP/TGFB2/TLR2/VCAM1/IL1B/CCL5/TLR7/TGFB1/CD40LG/TGFB3/CD40/PF4/TLR4/SELP                                                                                          |

|                                                                          |                         |                 |                                                                                                                                                                                      |
|--------------------------------------------------------------------------|-------------------------|-----------------|--------------------------------------------------------------------------------------------------------------------------------------------------------------------------------------|
| BIOCARTA_TOB1_PATHWAY                                                    | 2.2<br>338<br>977<br>87 | 0.0198<br>64398 | IL2RA/CD3E/CD3G/TGFBR2/TGFB2/IFNG/CD28/TGFB1/TGFB3/CD3D/CD247/SMAD3                                                                                                                  |
| PID_IL2_STAT5_PATHWAY                                                    | 2.2<br>211<br>185<br>91 | 0.0198<br>64398 | IL2RA/FASLG/IL2RB/SHC1/JAK3/LCK/IL2RG/FOXP3/PRF1/STAT5A/SP1/CDK6/LTA                                                                                                                 |
| WP_VITAMIN_B12_METABOLISM                                                | 2.2<br>199<br>989<br>73 | 0.0198<br>64398 | IL6/SAA4/SERPINE1/ICAM1/SOD2/SAA2/CCL2/APOB/LDLR/SAA1/IFNG/TCN1/ABCA1/NFKB2/IL1B/CCL5/SERP<br>INA3/NFKB1/MAT1A/MTR/CRP/CUBN                                                          |
| WP_NUCLEOTIDEBINDING_OLIGOMERIZATION_D<br>OMAIN_NOD_PATHWAY              | 2.2<br>164<br>967<br>75 | 0.0198<br>64398 | MEFV/NLRP12/NOD2/PRDM1/NAIP/NLRP7/IL1B/CASP5/NLRC4/NLRP3/CARD6/NLRP2/CASP8/CASP7/CARD9/<br>CASP1/NLRP10/NFKBIA/AIM2/CARD8/ACAP1/ERBIN                                                |
| PID_IL12_STAT4_PATHWAY                                                   | 2.2<br>056<br>991<br>53 | 0.0198<br>64398 | IL2RA/IL18R1/CD3E/CD3G/PRF1/IFNG/CD80/IL18RAP/CD28/FOS/CD4/TGFB1/IRF1/CD3D/STAT3/CD247/JUN                                                                                           |
| BIOCARTA_LAIR_PATHWAY                                                    | 2.2<br>056<br>328<br>36 | 0.0198<br>64398 | IL6/CXCL8/ICAM1/SELP/ITGA4/C3/VCAM1/ITGB2/ITGAL/ITGB1/C5/C7/IL1A                                                                                                                     |
| WP_CELLS_AND_MOLECULES_INVOLVED_IN_LO<br>CAL_ACUTE_INFLAMMATORY_RESPONSE | 2.2<br>056<br>328<br>36 | 0.0198<br>64398 | IL6/CXCL8/ICAM1/SELP/ITGA4/C3/VCAM1/ITGB2/ITGAL/ITGB1/C5/C7/IL1A                                                                                                                     |
| PID_TCPTP_PATHWAY                                                        | 2.1<br>997<br>991<br>55 | 0.0198<br>64398 | MET/SHC1/JAK3/PIK3CD/STAT6/CSF1R/EGF/ITGB1/STAT5A/PDGFRB/CSF1/VEGFA/LMAN1/ITGA1/STAT3/HG<br>F/KDR/PTPN2/INSR/STAT1/PDGFB/PTPN1/CREBBP/ATR/KPNB1/PIK3CA/PIAS1/SOS1/PIK3CB/GRB2/STAT5B |

|                                                           |                         |                 |                                                                                                                                                                                                                                                                                                                                                                                                                                                                                                           |
|-----------------------------------------------------------|-------------------------|-----------------|-----------------------------------------------------------------------------------------------------------------------------------------------------------------------------------------------------------------------------------------------------------------------------------------------------------------------------------------------------------------------------------------------------------------------------------------------------------------------------------------------------------|
| WP_LTF_DANGER_SIGNAL_RESPONSE_PATHWAY                     | 2.1<br>993<br>668<br>65 | 0.0198<br>64398 | IL6/CXCL8/TREM1/LTF/TLR2/CD14/IL1B/IL1A/NFKB1/MYD88/TRAF6/TLR4/IRAK1/IFNB1                                                                                                                                                                                                                                                                                                                                                                                                                                |
| WP_PATHOGENESIS_OF_SARSCOV2_MEDIATED_BY_NSP9NSP10_COMPLEX | 2.1<br>962<br>937<br>65 | 0.0198<br>64398 | LBP/IL6/CXCL8/CD3E/LCK/CD3G/CD2/ZAP70/CD4/MMP25/CD247/HLA-DRB1/CD8A/CRP                                                                                                                                                                                                                                                                                                                                                                                                                                   |
| WP_COMPLEMENT_ACTIVATION                                  | 2.1<br>951<br>575<br>61 | 0.0198<br>64398 | CFB/C1R/C1S/C3/C5/C7/C1QC/C1QA/C1QB/CFD/C2/C8A/CFP/CD55/C4A/C4B/C8G/C6                                                                                                                                                                                                                                                                                                                                                                                                                                    |
| WP_MIR5093P_ALTERATION_OF_YAP1ECM_AXIS                    | 2.1<br>891<br>255<br>44 | 0.0198<br>64398 | COL1A1/COL5A1/COL3A1/FN1/SNAI2/YAP1/TEAD3/TWIST1/THBS2/EDNRA/TEAD1/GPC6/TEAD4                                                                                                                                                                                                                                                                                                                                                                                                                             |
| REACTOME_SCAVENGING_BY_CLASS_A_RECEPTORS                  | 2.1<br>870<br>003<br>38 | 0.0198<br>64398 | COL1A1/COL1A2/COL3A1/MARCO/COLEC12/APOB/COL4A1/COL4A2                                                                                                                                                                                                                                                                                                                                                                                                                                                     |
| WP_VITAMIN_D_RECEPTOR_PATHWAY                             | 2.1<br>868<br>424<br>75 | 0.0234<br>375   | ORM1/VDR/BDKRB1/COL13A1/CEACAM1/PTGER4/TNFAIP3/TNFSF11/THBD/STEAP4/TNFSF4/TREM1/GXYLT2/PRDM1/ITGAM/EPHB4/CTLA4/CDKN2B/IGFBP3/SALL4/G0S2/ALOX5/CA9/SLC34A2/TGFB2/S100A8/LRRC25/SLC37A2/ALPG/IL1RL1/JUNB/HLA-DQA1/CD14/S100A9/SULT1C2/CAMP/MX2/EFNA5/IRF4/CRACR2A/CASP5/TGFB1/HLA-DQA2/CASP14/CYP7A1/CRACR2B/NFATC2/KRT34/ABCD1/NRIP1/CDKN1A/ADGRE5/CST6/ASAP2/CD40/FOXO1/STS/KLF4/SLC8A1/HLA-DRB1/IGFBP1/KL/CYP2S1/IL25/HIF1A/PPARD/GADD45A/MYO9B/CLDN2/MXD1/BCL6/KRT71/S100A4/SPP1/CYP24A1/RASGRP1/IGFBP5 |
| BIOCARTA_COMP_PATHWAY                                     | 2.1<br>863<br>954<br>5  | 0.0198<br>64398 | CFB/C1R/C1S/C3/C5/C7/C1QC/C1QA/C1QB/CFD/C2/C8A/C4A/C4B/C6                                                                                                                                                                                                                                                                                                                                                                                                                                                 |

|                                                                              |                         |                 |                                                                                                                                                              |
|------------------------------------------------------------------------------|-------------------------|-----------------|--------------------------------------------------------------------------------------------------------------------------------------------------------------|
| BIOCARTA_GRANULOCYTES_PATHWAY                                                | 2.1<br>827<br>492<br>58 | 0.0198<br>64398 | CSF3/CXCL8/ICAM1/SELP/ITGAM/IFNG/ITGB2/ITGAL/SELL/C5/IL1A/PECAM1                                                                                             |
| WP_ALPHA_6_BETA_4_SIGNALING_PATHWAY                                          | 2.1<br>827<br>310<br>03 | 0.0198<br>64398 | LAMB1/LAMA3/LAMA2/SHC1/LAMC1/ITGB4/LAMC2/LAMA1/LAMB2/LAMA5/IRS1/IRS2/PRKCD                                                                                   |
| WP_TLR4_SIGNALING_AND_TOLERANCE                                              | 2.1<br>824<br>471<br>69 | 0.0198<br>64398 | IL6/CXCL8/IRAK3/TICAM1/IKBKE/INPP5D/NFKB1/MYD88/RIPK1/NFKBIA/TRAF3/IRF7/TRAF6/TLR4/TIRAP/IRAK1/IFNB1/IKBKB                                                   |
| REACTOME_HYALURONAN_METABOLISM                                               | 2.1<br>805<br>850<br>1  | 0.0198<br>64398 | LYVE1/HAS3/CEMIP/HAS1/CD44/GUSB/STAB2/SLC9A1/HEXB                                                                                                            |
| PID_PTP1B_PATHWAY                                                            | 2.1<br>771<br>994<br>52 | 0.0198<br>64398 | LEP/PRLR/SHC1/SOCS3/LCK/FCGR2A/ITGB3/CSF1R/EGF/CAV1/BLK/STAT5A/PDGFRB/CSF1/HCK/IRS1/CDH2/STAT3/LYN/SPRY2/TYK2/FGR/JAK2/ITGA2B/INSR/LAT/PDGFB/PTPN1/AKT1/NOX4 |
| WP_TCELL_ANTIGEN_RECEPTOR_TCR_PATHWAY_DURING_STAPHYLOCOCCUS_AUREUS_INFECTION | 2.1<br>766<br>512<br>21 | 0.0198<br>64398 | CSF2/ICOS/ITK/GRAP2/LCK/CTLA4/PTPRC/IFNG/MAP3K8/IL10/CD28/ZAP70/LCP2/FOS/CD4/CD40LG/NFATC2/MAP3K14/PDCD1/CD3D/NFKB1/JUN/CARD11/MALT1/PTPN6/NFKBIA/CD8A       |
| WP_SIGNAL_TRANSDUCTION_THROUGH_IL1R                                          | 2.1<br>743<br>157<br>81 | 0.0198<br>64398 | IL6/IL1R1/IL1RN/TGFB2/IL1B/IL1RAP/IRAK3/TGFB1/IL1A/IRAK2/MAP3K14/TGFB3/NFKB1/MYD88/JUN/NFKBIA/MAP2K3/TRAF6/MAPK14/IRAK1/IFNB1/IKBKB                          |
| WP_OVERVIEW_OF_NANOPARTICLE_EFFECTS                                          | 2.1<br>734<br>844<br>46 | 0.0198<br>64398 | PTGS2/IL6/CXCL8/LAMA3/FN1/PTGS1/COL4A1/PIK3CD/ITGAD/HMOX1                                                                                                    |

|                                                                      |                         |                 |                                                                                                                                                                                                                                                                                                                                                                                                                                                                                                                                                                                                                    |
|----------------------------------------------------------------------|-------------------------|-----------------|--------------------------------------------------------------------------------------------------------------------------------------------------------------------------------------------------------------------------------------------------------------------------------------------------------------------------------------------------------------------------------------------------------------------------------------------------------------------------------------------------------------------------------------------------------------------------------------------------------------------|
| PID_INTEGRIN_CS_PATHWAY                                              | 2.1<br>714<br>315<br>03 | 0.0198<br>64398 | ITGA2/ITGA11/ITGA4/ITGA3/ITGB4/ITGAM/ITGA5/ITGB3/ITGA10/ITGB2/ITGAD/ITGB7/ITGAL/ITGB1/ITGB5/ITGA1/ITGA7/ITGAX/ITGA9                                                                                                                                                                                                                                                                                                                                                                                                                                                                                                |
| KEGG_CELL_ADHESION_MOLECULES_CAMS                                    | 2.1<br>695<br>645<br>85 | 0.0198<br>64398 | ICOS/ICAM1/SDC1/CLDN23/SIGLEC1/CLDN4/SELE/SELP/ITGA4/ITGAM/CTLA4/CD274/CLDN19/CD2/CD226/PTPRC/PDCD1LG2/VCAM1/CLDN1/CD80/CD6/ITGB2/HLA-DQA1/CD28/HLA-DOA/CD4/CLDN3/ITGB7/ITGAL/ICAM3/HLA-DQA2/HLA-DQB1/ITGB1/SELL/NECTIN2/CD40LG/CLDN18/PTPRF/SPN/PVR/PDCD1/HLA-DPA1/CDH2/HLA-C/CD40/HLA-B/NRCAM/NEO1/GLG1/CD276/CLDN7/F11R/CDH4/PECAM1/HLA-DRB1/CDH5/HLA-F/CLDN14/CLDN2/HLA-DPB1/CNTNAP1/CD8A/ITGA9/SDC2/HLA-E/CADM1/CD86/VCAN/HLA-DMA/SDC4                                                                                                                                                                        |
| WP_TYPE_I_INTERFERON_INDUCION_AND_SIGNALING_DURING_SARSCOV2_INFECTIO | 2.1<br>681<br>011<br>77 | 0.0198<br>64398 | TREML4/OAS3/FOS/TLR7/IKBKE/NFKB1/STAT2/MYD88/JUN/OAS2/NFKBIA/TRAF3/TYK2/IFNAR1/OAS1/TRAF6/MAPK14/IRF9/STAT1/IKKBK                                                                                                                                                                                                                                                                                                                                                                                                                                                                                                  |
| BIOCARTA_TH1TH2_PATHWAY                                              | 2.1<br>664<br>392<br>43 | 0.0198<br>64398 | IL2RA/IL18R1/IL4R/IFNG/CD28/NR1I2/IL12B/CD40LG/CD40/IL12RB1/HLA-DRB1                                                                                                                                                                                                                                                                                                                                                                                                                                                                                                                                               |
| WP_NEOVASCULARISATION_PROCESSES                                      | 2.1<br>648<br>159<br>61 | 0.0198<br>64398 | EPHB4/NOTCH3/TGFB2/RELB/NFKB2/REL/MMP9/CXCL12/TGFB1/FLT4/TGFB3/NFKB1/HIF1A/ACVRL1/SMAD1/SMAD3/ANGPT1/KDR/DLL4/KITLG/JAG1/CXCR4                                                                                                                                                                                                                                                                                                                                                                                                                                                                                     |
| WP_HEMATOPOIETIC_STEM_CELL_DIFFERENTIATION                           | 2.1<br>646<br>465<br>79 | 0.0198<br>64398 | CSF2/FOSB/CSF3/IL6/TNXP/RUNX1/CIITA/ITGB3/IKZF1/MIR221/PIM1/MUC1/NCKAP1L/FOS/IL1B/VAV1/LEF1/STAT5A/CSF1/RHOH/NFATC2/IL1A/TRAF3IP3/SPI1/FLI1                                                                                                                                                                                                                                                                                                                                                                                                                                                                        |
| NABA_SECRETED_FACTORS                                                | 2.1<br>629<br>138<br>98 | 0.0365<br>9437  | CCL13/CCL11/EREG/CSF2/CCL20/CXCL13/CCL18/CXCL5/CCL7/IL20/CSF3/IL6/LEP/SFRP2/LIF/IL36B/PPBP/NF3/CXCL8/CXCL3/IL36RN/CCL23/CXCL1/FST/SFRP4/IL11/CHRDL2/FASLG/INHBA/CBLN4/IL24/IL1RN/IL19/TNFSF11/TNFSF14/CCL2/CXCL2/CCL22/INSL3/TNFSF4/TNFSF15/WNT3A/CLCF1/AREG/CXCL6/FGF19/ANGPTL4/CXCL9/LTB/IL22/IL36G/PF4V1/FGF10/TGFB2/EGFL6/INS-IGF2/IFNG/S100A8/IL10/CCL26/S100A9/VEGFC/CXCL12/INHBE/OSM/CCL14/IL37/IL1B/CCL5/TCHH/IL12B/GDF5/ARTN/TNFSF8/TGFB1/HBEGF/EGF/FSTL1/CCL24/CBLN3/CSF1/DHH/CCL8/VEGFA/S100A5/GDF15/IL15/XCL2/IL1A/S100P/IFNE/SFRP5/TGFB3/NRG1/MEGF8/TNFSF13/CXCL10/INHBB/CRNN/S100A11/FGF11/TNFSF10/F |

|                                                                    |                         |                 |                                                                                                                                                                                                                                                                                                                   |
|--------------------------------------------------------------------|-------------------------|-----------------|-------------------------------------------------------------------------------------------------------------------------------------------------------------------------------------------------------------------------------------------------------------------------------------------------------------------|
|                                                                    |                         |                 | STL3/IL16/FGF5/PDGFD/BMP5/IL25/S100A12/XCL1/PF4/ANGPT1/HGF/ANGPT2/BTC/ANGPTL6/S100A4/IFNA5/IFNA14                                                                                                                                                                                                                 |
| PID_IL27_PATHWAY                                                   | 2.1<br>626<br>725<br>29 | 0.0198<br>64398 | IL6/GATA3/IFNG/IL1B/IL12B/TGFB1/STAT5A/IL27RA/STAT3/STAT2/IL12RB1/IL27/TYK2/JAK2/STAT1/EBI3/IL6S<br>T/IL2                                                                                                                                                                                                         |
| PID_GMCSF_PATHWAY                                                  | 2.1<br>622<br>556<br>68 | 0.0198<br>64398 | CSF2/CSF2RB/CISH/CCL2/SHC1/PIM1/OSM/FOS/STAT5A/SYK/STAT3/LYN/JAK2/IRF8/STAT1/PRKACA/IKBKB                                                                                                                                                                                                                         |
| WP_REGULATION_OF_WNTBCATENIN_SIGNALING_BY_SMALL_MOLECULE_COMPOUNDS | 2.1<br>599<br>230<br>75 | 0.0198<br>64398 | SFRP4/FZD1/FZD7/LRP1/MBOAT1/FZD8/LEF1                                                                                                                                                                                                                                                                             |
| KEGG_LEUKOCYTE_TRANSENDOTHELIAL_MIGRATION                          | 2.1<br>576<br>040<br>43 | 0.0198<br>64398 | MYL10/ITK/ICAM1/CLDN23/CLDN4/ITGA4/ACTN1/ITGAM/TXK/CLDN19/CYBB/PIK3CG/MAPK13/VCAM1/CLDN1<br>/RASSF5/ITGB2/PIK3CD/MMP9/VCL/NCF2/CXCL12/PIK3R5/RAC2/VAV1/CLDN3/ITGAL/MYL7/ITGB1/MSN/RHO<br>H/CLDN18/MYL9/SIPA1/PLCG2/VAV2/NCF1/ACTN4/CLDN7/PXN/F11R/PECAM1/VASP/CDH5/ROCK1/CLDN14/<br>CLDN2/NCF4/ROCK2/PLCG1/CTNND1 |
| BIOCARTA_NO2IL12_PATHWAY                                           | 2.1<br>524<br>894<br>42 | 0.0198<br>64398 | CXCR3/NOS2/CD3E/CCR5/CD3G/CD2/IFNG/CD4/CD3D/CD247/IL12RB1/TYK2/JAK2                                                                                                                                                                                                                                               |
| WP_TGFBETA_RECEPTOR_SIGNALLING_IN_SKELETAL_DYSPLASIAS              | 2.1<br>505<br>977<br>53 | 0.0198<br>64398 | THBS1/LIF/SERPINE1/FST/FBN1/INHBA/LTBP1/RUNX2/TGFBR2/LTBP3/IFNG/FOS/LEF1/TGFB1/EGF/ENG/NF<br>KB1/STAT3/RUNX3/JUN/SKI/SMAD1/SMAD3/SPP1/EP300/FOXH1/TFE3/WNT1/LEFTY2/STAT1/ADAMTSL2                                                                                                                                 |
| BIOCARTA_IL2_PATHWAY                                               | 2.1<br>491<br>882<br>7  | 0.0198<br>64398 | IL2RA/IL2RB/SHC1/JAK3/LCK/IL2RG/FOS/STAT5A/SYK/JUN                                                                                                                                                                                                                                                                |
| REACTOME_INTERFERON_SIGNALING                                      | 2.1<br>478              | 0.0239<br>69653 | ICAM1/GBP5/SOCS3/CIITA/EGR1/CD44/XAF1/GBP4/OAS3/IFNG/IFI30/VCAM1/FLNA/HLA-<br>DQA1/MX2/TRIM38/PML/IRF4/HLA-DQB2/GBP3/HLA-DQA2/HLA-DQB1/TRIM22/PTAFR/SOCS1/HLA-<br>H/MX1/IFITM2/GBP2/NUP210/IRF1/HLA-DPA1/HLA-C/GBP6/STAT2/POM121/HLA-                                                                             |



|                                                               |                         |                 |                                                                                                                                                                                                                                                                                                                                                                                                                                                                                                                                                                                                                                                                                                                                                                                                                                      |
|---------------------------------------------------------------|-------------------------|-----------------|--------------------------------------------------------------------------------------------------------------------------------------------------------------------------------------------------------------------------------------------------------------------------------------------------------------------------------------------------------------------------------------------------------------------------------------------------------------------------------------------------------------------------------------------------------------------------------------------------------------------------------------------------------------------------------------------------------------------------------------------------------------------------------------------------------------------------------------|
|                                                               | 460<br>35               |                 | B/UBA7/PRKCD/POM121C/TRIM34/TRIM5/SAMHD1/IFITM1/OAS2/IFITM3/GBP1/HLA-DRB1/PTPN6/IRF6/TRIM10/DDX58/HLA-F/OASL/HLA-DPB1/IFNA5/IFNA14/TYK2/TRIM14/SP100/TRIM6/PLCG1/HLA-E/PTPN2/EIF4G1/IRF7/JAK2/IRF8/IFNAR1/OAS1/NUP98/IRF5/TRIM25/FCGR1A/TRIM45/TPR/RSAD2/RNASEL/HERC5/MID1/CAMK2D/ADAR/IRF9/HLA-G/IRF2/STAT1/USP18/IFNB1/NUP188/NUP205/TRIM26/PTPN1/BST2/TRIM21/HLA-DRA/ISG20/NEDD4/NUP62/NUP153/IFNA17                                                                                                                                                                                                                                                                                                                                                                                                                              |
| PID_GLYPICAN_1PATHWAY                                         | 2.1<br>471<br>482<br>1  | 0.0198<br>64398 | PLA2G2A/LCK/TGFB2/TGFB2/FGFR1/LAMA1/TGFB1/BLK/VEGFA/HCK/TGFB3/NGR1/SLIT2/LYN/GPC1/FLT1                                                                                                                                                                                                                                                                                                                                                                                                                                                                                                                                                                                                                                                                                                                                               |
| BIOCARTA_MONOCYTE_PATHWAY                                     | 2.1<br>445<br>904<br>52 | 0.0198<br>64398 | ICAM1/SELE/SELP/ITGA4/ITGAM/CD44/ITGB2/ITGAL/ITGB1/SELL                                                                                                                                                                                                                                                                                                                                                                                                                                                                                                                                                                                                                                                                                                                                                                              |
| REACTOME_LEISHMANIA_INFECTIO                                  | 2.1<br>403<br>502<br>44 | 0.0331<br>92879 | IGHV4-59/IGHG2/IGHG4/IGHV1-2/GNGT1/IGKV5-2/IL6/IGKV1-39/IGHV1-46/IGKV2-30/IGKV2D-30/PTGER2/IGHV2-70/MC3R/GCG/GIP/IGKV3-15/CD163/IGLV3-25/IGHV4-34/IGKV1-16/ITPR3/CTSG/PTGER4/IGHG1/MEFV/IGLV3-21/IGLV1-47/IGLV2-23/IGLV1-44/IGLV3-1/INSL3/GPR39/GPR84/IGHV3-33/IGLV2-14/HRH2/FZD7/IGHV3-11/PTGIR/CD3G/FCGR2A/IGKV1D-16/IGHV3-30/IGLV3-19/IGHV2-5/IGLV1-40/MYH9/C3/IGLC2/MYO1C/IGKV1D-12/ARPC1B/ADCY7/GPR15/IGKV1-5/IGKV2D-28/IL10/IGHV3-23/FURIN/FCGR3A/ADM/IGKV3-11/IGKV1D-39/IGLV2-8/NFKB2/NCKAP1L/IGLV2-11/RHBDF2/IGLV7-43/IGKV4-1/IL1B/VAV1/CALCR/IGHV1-69/IGLV1-51/C3AR1/IGHV4-39/GPR25/IGLV6-57/SYK/GPBAR1/NLRP3/WIPF3/WAS/HCK/WIPF1/HTR7/PLCG2/IL1A/VAV2/NT5E/IGKV3-20/NFKB1/ADM2/ADCY3/CALCA/IGHV3-7/GPR20/CD247/JUN/LYN/PSTPIP1/CASP1/IGKV1-17/IGHV3-48/IGHV3-53/DPEP2/ITPR2/IGKV1-12/MC1R/WASF2/MYO9B/ADCY4/ENTPD5/CYSLTR1 |
| WP_SIMPLIFIED_DEPICTION_OF_MYD88_DISTINCT_INPUTOUTPUT_PATHWAY | 2.1<br>398<br>754<br>89 | 0.0198<br>64398 | TLR8/TLR6/TLR2/TLR5/TLR9/TLR1/TLR7/IL1A/NFKB1/MYD88/TIFA/JUN/TRAF6/TLR4/IRAK1                                                                                                                                                                                                                                                                                                                                                                                                                                                                                                                                                                                                                                                                                                                                                        |
| KEGG_T_CELL_RECEPTOR_SIGNALING_PATHWAY                        | 2.1<br>392<br>903<br>64 | 0.0198<br>64398 | CSF2/ICOS/CBLC/ITK/CD3E/GRAP2/TEC/LCK/CD3G/CTLA4/PTPRC/PIK3CG/MAPK13/IFNG/NFATC4/MAP3K8/IL10/PIK3CD/CD28/PIK3R5/ZAP70/LCP2/FOS/CD4/VAV1/CD40LG/NFATC2/VAV2/MAP3K14/PDCD1/CD3D/NFKB1/CD247/JUN/CARD11/MALT1/PTPN6/NFKBIA/NFATC1/CD8A/NFAT5/NFATC3/RASGRP1/PLCG1                                                                                                                                                                                                                                                                                                                                                                                                                                                                                                                                                                       |

|                                         |                         |                 |                                                                                                                                                                                                                                                                                           |
|-----------------------------------------|-------------------------|-----------------|-------------------------------------------------------------------------------------------------------------------------------------------------------------------------------------------------------------------------------------------------------------------------------------------|
| PID_SHP2_PATHWAY                        | 2.1<br>392<br>489<br>94 | 0.0198<br>64398 | IL6/IL2RA/NTF3/IL2RB/SHC1/JAK3/LCK/IL2RG/NTRK1/IFNG/IL6R/EGF/PDGFRB/VEGFA/IRS1/NOS3/ANGPT1/SDC2/KDR/JAK2/BDNF/IGF1R/STAT1/PRKACA/PDGFB                                                                                                                                                    |
| BIOCARTA_IL12_PATHWAY                   | 2.1<br>373<br>937<br>41 | 0.0198<br>64398 | CXCR3/IL18R1/CD3E/CCR5/CD3G/IFNG/CD3D/CD247/JUN/IL12RB1/TYK2/ETV5/JAK2/MAPK14                                                                                                                                                                                                             |
| KEGG_SMALL_CELL_LUNG_CANCER             | 2.1<br>320<br>936<br>42 | 0.0198<br>64398 | PTGS2/LAMB1/LAMA3/NOS2/ITGA2/LAMA2/FN1/BIRC3/LAMC1/ITGA3/LAMC2/CDKN2B/COL4A1/COL4A2/PIK3CG/LAMA4/LAMA1/PIK3CD/PIK3R5/ITGB1/LAMB2/TRAF5/LAMA5/TRAF1/NFKB1/LAMC3/CDK6/NFKBIA/TRAF3/LAMB3/TRAF6/PIAS3/LAMB4/ITGA2B/TP53/RXRA/ITGAV/IKBKB/CCNE1/AKT1/CDK2/PTEN/ITGA6/PIK3CA/BCL2/COL4A6/PIAS1 |
| ST_TUMOR_NECROSIS_FACTOR_PATHWAY        | 2.1<br>297<br>451<br>46 | 0.0198<br>64398 | TNFAIP3/BIRC3/TNFRSF1B/NFKB2/NFKB1/CASP8/RIPK1/JUN/RALBP1/CFLAR/TNFRSF1A/NFKBIA/MAP3K3                                                                                                                                                                                                    |
| REACTOME_INTERLEUKIN_6_FAMILY_SIGNALING | 2.1<br>294<br>090<br>51 | 0.0198<br>64398 | IL31RA/IL6/LIF/IL11/SOCS3/CLCF1/OSMR/IL6R/OSM/STAT3/TYK2/JAK2/CBL/CTF1/STAT1                                                                                                                                                                                                              |
| PID_TAP63_PATHWAY                       | 2.1<br>266<br>755<br>52 | 0.0198<br>64398 | VDR/TFAP2C/ITGA3/ITGB4/IGFBP3/EGR2/PML/CLCA2/GDF15/CDKN1A/PRKCD/SERPINB5/PERP/SP1/GADD45A/EP300/DICER1/PMAIP1/FAS/JAG1/TP63/CDKN2A/GPX2/IKBKB/SHH/ABL1                                                                                                                                    |
| BIOCARTA_CTLA4_PATHWAY                  | 2.1<br>252<br>875<br>8  | 0.0198<br>64398 | ICOS/ITK/CD3E/LCK/CD3G/CTLA4/CD80/CD28/CD3D/CD247/HLA-DRB1                                                                                                                                                                                                                                |
| REACTOME_SIGNALING_BY_SCF_KIT           | 2.1<br>249<br>666<br>56 | 0.0198<br>64398 | GRB7/PTPRU/GRAP2/TEC/CMA1/LCK/GRB10/FES/MMP9/VAV1/STAT5A/SH2B3/SOCS1/STAT3/LYN/PTPN6/KITLG/JAK2                                                                                                                                                                                           |

|                                                                                             |                         |                 |                                                                                                                                                                                                                                                                                                                                                                                                                                                                                                                                                                                                                                                                           |
|---------------------------------------------------------------------------------------------|-------------------------|-----------------|---------------------------------------------------------------------------------------------------------------------------------------------------------------------------------------------------------------------------------------------------------------------------------------------------------------------------------------------------------------------------------------------------------------------------------------------------------------------------------------------------------------------------------------------------------------------------------------------------------------------------------------------------------------------------|
| REACTOME_ANTI_INFLAMMATORY_RESPONSE_F<br>AVOURING_LEISHMANIA_PARASITE_INFECTION             | 2.1<br>213<br>142<br>46 | 0.0253<br>15243 | IGHV4-59/IGHG2/IGHG4/IGHV1-2/GNGT1/IGKV5-2/IL6/IGKV1-39/IGHV1-46/IGKV2-30/IGKV2D-30/PTGER2/IGHV2-70/MC3R/GCG/GIP/IGKV3-15/CD163/IGLV3-25/IGHV4-34/IGKV1-16/ITPR3/PTGER4/IGHG1/IGLV3-21/IGLV1-47/IGLV2-23/IGLV1-44/IGLV3-1/INSL3/GPR39/GPR84/IGHV3-33/IGLV2-14/HRH2/IGHV3-11/PTGIR/CD3G/FCGR2A/IGKV1D-16/IGHV3-30/IGLV3-19/IGHV2-5/IGLV1-40/MYH9/IGLC2/IGKV1D-12/ADCY7/GPR15/IGKV1-5/IGKV2D-28/IL10/IGHV3-23/FURIN/FCGR3A/ADM/IGKV3-11/IGKV1D-39/IGLV2-8/IGLV2-11/RHBDF2/IGLV7-43/IGKV4-1/CALCR/IGHV1-69/IGLV1-51/IGHV4-39/GPR25/IGLV6-57/SYK/GPBAR1/HCK/HTR7/PLCG2/IGKV3-20/ADM2/ADCY3/CALCA/IGHV3-7/GPR20/CD247/LYN/IGKV1-17/IGHV3-48/IGHV3-53/DPEP2/ITPR2/IGKV1-12/MC1R |
| BIOCARTA_THELPER_PATHWAY                                                                    | 2.1<br>179<br>912<br>36 | 0.0198<br>64398 | ICAM1/CD3E/CD3G/CD2/PTPRC/ITGB2/CD28/CD4/ITGAL/CD3D/CD247                                                                                                                                                                                                                                                                                                                                                                                                                                                                                                                                                                                                                 |
| REACTOME_RUNX1_AND_FOXP3_CONTROL_THE<br>_DEVELOPMENT_OF_REGULATORY_T_LYMPHOC<br>YTES_TREGS_ | 2.1<br>149<br>506<br>98 | 0.0198<br>64398 | CR1/IL2RA/TNFRSF18/RUNX1/CTLA4/FOXP3/IFNG/NFATC2                                                                                                                                                                                                                                                                                                                                                                                                                                                                                                                                                                                                                          |
| ST_INTERLEUKIN_4_PATHWAY                                                                    | 2.1<br>131<br>520<br>05 | 0.0198<br>64398 | PI3/CISH/SHC1/JAK3/IL2RG/IL4R/STAT6/INPP5D/IL13RA1                                                                                                                                                                                                                                                                                                                                                                                                                                                                                                                                                                                                                        |
| SIG_PIP3_SIGNALING_IN_B_LYMPHOCYTES                                                         | 2.1<br>088<br>945<br>92 | 0.0198<br>64398 | ITPR3/TEC/PTPRC/PIK3R5/VAV1/DAPP1/SYK/PLCG2/RPS6KA3/LYN/ITPR2/FOXO3/CYTH3/CDKN2A/BTK/AKT1/RPS6KA1/PTEN/FLOT2/PIK3CA/PREX1/RPS6KA2/PITX2/CD19/RPS6KB1/AKT2/PDPK1                                                                                                                                                                                                                                                                                                                                                                                                                                                                                                           |
| REACTOME_INTERLEUKIN_3_INTERLEUKIN_5_AN<br>D_GM_CSF_SIGNALING                               | 2.1<br>087<br>450<br>65 | 0.0198<br>64398 | CSF2/IL2RA/IL2RB/CSF2RB/SHC1/JAK3/TEC/IL2RG/PIK3CD/VAV1/STAT5A/SYK/HCK/INPP5D/LYN/PTPN6                                                                                                                                                                                                                                                                                                                                                                                                                                                                                                                                                                                   |
| WP_SELENIUM_MICRONUTRIENT_NETWORK                                                           | 2.0<br>991<br>313<br>69 | 0.0198<br>64398 | XDH/PTGS2/IL6/SAA4/SERPINE1/ICAM1/SOD2/SAA2/CCL2/APOB/LDLR/PTGS1/ALOX5/SAA1/IFNG/ABCA1/KYNU/NFKB2/IL1B/SELENON/ALOX5AP/SERPINA3/FGG/NFKB1/ALOX15B/KMO/GGT2/GGTLC2                                                                                                                                                                                                                                                                                                                                                                                                                                                                                                         |

|                                                           |                         |                 |                                                                                                                                                                                                                                                                                                                            |
|-----------------------------------------------------------|-------------------------|-----------------|----------------------------------------------------------------------------------------------------------------------------------------------------------------------------------------------------------------------------------------------------------------------------------------------------------------------------|
| PID_INTEGRIN4_PATHWAY                                     | 2.0<br>962<br>920<br>84 | 0.0198<br>64398 | LAMB1/LAMA3/LAMA2/LAMC1/ITGB4/LAMC2/LAMA1/LAMB2/LAMA5                                                                                                                                                                                                                                                                      |
| WP_B_CELL_RECEPTOR_SIGNALING_PATHWAY                      | 2.0<br>948<br>045<br>09 | 0.0198<br>64398 | CR2/SHC1/TEC/LCK/PTPRC/PIK3CG/REL/PIK3AP1/RAC2/IRF4/VAV1/DAPP1/BLK/SYK/HCLS1/NFATC2/MAP4<br>K1/INPP5D/PLCG2/VAV2/NFKB1/FOXO1/MAPK4/PRKCD/JUN/LYN/CARD11/MALT1/PTPN6/NFKBIA/KLF11/PT<br>PN18/BCL6/NFATC3/PLCG1/GTF2I/SH3BP2/MAPK14/BTK/CBL/BCL10/IKBKB/MEF2D/AKT1/BRAF/RPS6KA1/L<br>AT2/CD79A/PIP5K1A/MAP3K7/BLNK/SOS1/ETS1 |
| REACTOME_INTERLEUKIN_2_SIGNALING                          | 2.0<br>934<br>741<br>72 | 0.0198<br>64398 | IL2RA/IL2RB/SHC1/JAK3/LCK/IL2RG/STAT5A/SYK                                                                                                                                                                                                                                                                                 |
| BIOCARTA_DC_PATHWAY                                       | 2.0<br>899<br>331<br>97 | 0.0198<br>64398 | CSF2/ANPEP/CD5/CD2/CD7/IFNG/IL10/TLR7/CD40/CD33/ITGAX                                                                                                                                                                                                                                                                      |
| REACTOME_GPVI_MEDIATED_ACTIVATION_CASCADE                 | 2.0<br>898<br>577<br>4  | 0.0198<br>64398 | COL1A1/COL1A2/LCK/PIK3R6/PIK3CG/PIK3R5/LCP2/RAC2/VAV1/PDPN/SYK/PLCG2/VAV2/LYN/FCER1G/PTP<br>N6                                                                                                                                                                                                                             |
| WP_OVERVIEW_OF_LEUKOCYTEINTRINSIC_HIPPO_PATHWAY_FUNCTIONS | 2.0<br>892<br>508<br>97 | 0.0198<br>64398 | CCR7/PRDM1/FOXP3/LATS2/YAP1/RASSF5/NDRG1/FYB1/TEAD3/ITGAL/FERMT3/FOXO1/LPL/RAB13/FOXO3/<br>MOB1A/TEAD1/MAPK14/TEAD4/STK3/LATS1/SAV1                                                                                                                                                                                        |
| PID_DELTA_NP63_PATHWAY                                    | 2.0<br>865<br>179<br>5  | 0.0198<br>64398 | VDR/COL5A1/BDKRB2/FOSL2/RUNX1/ITGA3/RAB38/TBXT/IGFBP3/YAP1/CEBPD/RRAD/IL1A/NRG1/SFN/AXL/<br>PERP/KRT5/POU2F2/HELLS/TP63/CDKN2A/GPX2                                                                                                                                                                                        |
| BIOCARTA_IL6_PATHWAY                                      | 2.0<br>854<br>707<br>91 | 0.0198<br>64398 | IL6/SHC1/JAK3/CEBPB/IL6R/FOS/STAT3/SRF/JUN                                                                                                                                                                                                                                                                                 |

|                                                                                           |                         |                 |                                                                                                                                                                                                                                                                                                                                                                                                                                          |
|-------------------------------------------------------------------------------------------|-------------------------|-----------------|------------------------------------------------------------------------------------------------------------------------------------------------------------------------------------------------------------------------------------------------------------------------------------------------------------------------------------------------------------------------------------------------------------------------------------------|
| REACTOME_PLATELET_ADHESION_TO_EXPOSED<br>_COLLAGEN                                        | 2.0<br>854<br>294<br>25 | 0.0198<br>64398 | COL1A1/COL1A2/ITGA2/ITGA10/ITGB1/ITGA1/GP1BA/VWF/LYN/FCER1G                                                                                                                                                                                                                                                                                                                                                                              |
| WP_AMPLIFICATION_AND_EXPANSION_OF_ONCO<br>GENIC_PATHWAYS_AS_METASTATIC_TRAITS             | 2.0<br>838<br>184<br>65 | 0.0198<br>64398 | POSTN/TNC/PIK3CG/CYTIP/VCAM1/LEF1/VEGFA/EPAS1/JAG1/CXCR4/TCF7                                                                                                                                                                                                                                                                                                                                                                            |
| WP_TGFBETA_RECEPTOR_SIGNALING                                                             | 2.0<br>827<br>060<br>18 | 0.0198<br>64398 | THBS1/LIF/SERPINE1/FST/INHBA/LTBP1/RUNX2/TGFBR2/IFNG/FOS/LEF1/TGFB1/EGF/ENG/NFKB1/STAT3/R<br>UNX3/JUN/SKI/SMAD1/SMAD3/SPP1/EP300                                                                                                                                                                                                                                                                                                         |
| BIOCARTA_LYM_PATHWAY                                                                      | 2.0<br>818<br>888<br>92 | 0.0198<br>64398 | CXCL8/ICAM1/ITGA4/VCAM1/ITGB2/ITGAL/ITGB1/SELL/IL1A/PECAM1                                                                                                                                                                                                                                                                                                                                                                               |
| BIOCARTA_IL17_PATHWAY                                                                     | 2.0<br>807<br>332<br>34 | 0.0198<br>64398 | CSF3/IL6/CXCL8/CD3E/CD3G/CD2/CD4/CD3D/CD247/CD8A/KITLG                                                                                                                                                                                                                                                                                                                                                                                   |
| REACTOME_PURINERGIC_SIGNALING_IN_LEISHM<br>ANIASIS_INFECTION                              | 2.0<br>769<br>644<br>43 | 0.0198<br>64398 | CTSG/MEFV/C3/NFKB2/IL1B/C3AR1/NLRP3/IL1A/NT5E/NFKB1/PSTPIP1/CASP1/ENTPD5                                                                                                                                                                                                                                                                                                                                                                 |
| KEGG_NATURAL_KILLER_CELL_MEDIATED_CYTO<br>TOXICITY                                        | 2.0<br>764<br>488<br>49 | 0.0198<br>64398 | CSF2/ICAM1/FASLG/SHC1/TNFRSF10C/KIR2DL1/LCK/RAET1L/FCGR3B/KIR2DL4/TNFRSF10A/TNFRSF10D/PI<br>K3CG/PRF1/IFNG/NFATC4/RAET1G/FCGR3A/ITGB2/PIK3CD/PIK3R5/ZAP70/ULBP3/LCP2/RAC2/VAV1/ITGAL/<br>NCR1/SYK/TNFRSF10B/NFATC2/PLCG2/VAV2/MICB/GZMB/HLA-C/KIR2DS4/KIR3DL2/HLA-<br>B/CD247/FCER1G/TNFSF10/SH2D1A/PTPN6/KIR3DL1/NFATC1/MICA/KLRD1/IFNA5/NFAT5/IFNA14/NFATC3/P<br>LCG1/HLA-E/IFNAR1/FAS/SH3BP2/KIR2DL3/ULBP2/ULBP1/ARAF/CD244/LAT/HLA-G |
| REACTOME_ANTIGEN_PRESENTATION_FOLDING<br>_ASSEMBLY_AND_PEPTIDE_LOADING_OF_CLASS<br>_I_MHC | 2.0<br>756<br>428<br>68 | 0.0198<br>64398 | ERAP2/ERAP1/SEC24D/TAPBP/PDIA3/HLA-C/HLA-B/TAP1/HSPA5/HLA-F/HLA-<br>E/SEC23A/SEC24A/CALR/TAP2/HLA-G/SEC31A/CANX/SEC24C                                                                                                                                                                                                                                                                                                                   |

|                                                                           |                         |                 |                                                                                                                                                                                                                                                                                                            |
|---------------------------------------------------------------------------|-------------------------|-----------------|------------------------------------------------------------------------------------------------------------------------------------------------------------------------------------------------------------------------------------------------------------------------------------------------------------|
| WP_REGULATORY_CIRCUITS_OF_THE_STAT3_SIGNALING_PATHWAY                     | 2.0<br>722<br>232<br>22 | 0.0198<br>64398 | IL2RA/IL7R/IL21R/IL2RB/IL22RA1/CSF2RB/IL9R/SOCS3/JAK3/AGTR2/OSMR/IL2RG/PTPRC/MAPK13/F2RL3/CSF3R/IL15RA/IL10RA/IL6R/F2RL2/PDGFRB/AGTR1/IL27RA/STAT3/MAPK4/F2R/IFNLR1/TYK2/IL20RB/JAK2/IFNAR1/IL10RB/PIAS3/MAPK14/GHR/DUSP2/CTF1                                                                             |
| BIOCARTA_BLYMPHOCYTE_PATHWAY                                              | 2.0<br>719<br>705<br>86 | 0.0198<br>64398 | CR1/ICAM1/CR2/FCGR2B/PTPRC/CD80/ITGB2/ITGAL/CD40/HLA-DRB1                                                                                                                                                                                                                                                  |
| REACTOME_CASPASE_ACTIVATION_VIA_DEATH_RECEPTORS_IN_THE_PRESENCE_OF_LIGAND | 2.0<br>707<br>963       | 0.0198<br>64398 | FASLG/TNFRSF10A/TICAM2/CD14/TNFRSF10B/TICAM1/CASP8/RIPK1/TNFSF10/CFLAR/LY96/FAS/TLR4                                                                                                                                                                                                                       |
| REACTOME_ACTIVATION_OF_MATRIX_METALLOPROTEINASES                          | 2.0<br>657<br>273<br>42 | 0.0198<br>64398 | MMP1/MMP10/MMP13/CTSG/MMP7/MMP14/MMP8/TPSAB1/CMA1/TIMP1/MMP11/COL18A1/FURIN/MMP9/ELANE/MMP3/MMP25/CTSK                                                                                                                                                                                                     |
| BIOCARTA_CTL_PATHWAY                                                      | 2.0<br>655<br>728<br>82 | 0.0198<br>64398 | ICAM1/FASLG/CD3E/CD3G/PRF1/ITGB2/ITGAL/GZMB/CD3D/CD247                                                                                                                                                                                                                                                     |
| WP_SPINAL_CORD_INJURY                                                     | 2.0<br>610<br>752<br>24 | 0.0198<br>64398 | PTGS2/IL6/LEP/CCR2/CXCL8/ROS1/IL1R1/CXCL1/ICAM1/NOS2/FCGR2C/CCL2/CXCL2/SELP/PLA2G2A/LILRB2/LILRB3/LTB/FCGR2A/EGR1/COL4A1/LTB4R/ZFP36/IFNG/MMP12/EFNB2/MMP9/NR4A1/ARG1/SLIT3/FOS/IL1B/TGFB1/C5/IL1A/TNFSF13/SLIT2/CXCL10/C1QB/PLA2G5/LGALS3/VIM/MIR23B                                                      |
| WP_IL2_SIGNALING_PATHWAY                                                  | 2.0<br>608<br>888<br>77 | 0.0198<br>64398 | IL2RA/IL2RB/CISH/SHC1/SOCS3/JAK3/LCK/IL2RG/FOS/STAT5A/SYK/STAT3/JUN                                                                                                                                                                                                                                        |
| REACTOME_RESPONSE_TO_ELEVATED_PLATELET_CYTOSOLIC_CA2_                     | 2.0<br>593<br>779<br>22 | 0.0198<br>64398 | THBS1/ORM1/F13A1/SERPINE1/PPBP/FN1/SELP/CD109/SERPINA1/ACTN1/TOR4A/ITGB3/TIMP1/A2M/TGFB2/SERPING1/PHACTR2/PROS1/FLNA/VCL/VEGFC/RARRES2/LHFPL2/ECM1/TGFB1/EGF/CD36/SERPINA3/CTSW/GAS6/TLN1/PLEK/VEGFA/FERMT3/FGG/TGFB3/STXBP2/ACTN4/CALU/CFD/SRGN/VWF/PECAM1/HSPA5/LGALS3BP/PF4/HGF/QSOX1/APLP2/SYTL4/PDGFA |
| REACTOME_INTERLEUKIN_15_SIGNALING                                         | 2.0<br>552              | 0.0198<br>64398 | IL2RB/SHC1/JAK3/IL2RG/IL15RA/STAT5A/IL15/STAT3                                                                                                                                                                                                                                                             |

|                                      |                         |                 |                                                                                                                                                                                                                                                                                                                                                                                    |
|--------------------------------------|-------------------------|-----------------|------------------------------------------------------------------------------------------------------------------------------------------------------------------------------------------------------------------------------------------------------------------------------------------------------------------------------------------------------------------------------------|
|                                      | 214<br>69               |                 |                                                                                                                                                                                                                                                                                                                                                                                    |
| WP_NEPHROTIC_SYNDROME                | 2.0<br>548<br>205<br>69 | 0.0198<br>64398 | ITGA3/ITGB4/CTLA4/SYNPO/APOL1/MYO1E/MYH9/CD2AP/LAMB2/PODXL/EMP2/WT1/LMNA/ACTN4/PAX2/PLCE1/GPC5/CUBN/ARHGAP24/CD151                                                                                                                                                                                                                                                                 |
| PID_A6B1_A6B4_INTEGRIN_PATHWAY       | 2.0<br>545<br>205<br>65 | 0.0198<br>64398 | LAMB1/LAMA3/MET/LAMA2/SHC1/LAMC1/ITGB4/LAMC2/ERBB2/LAMA4/LAMA1/EGF/ITGB1/LAMB2/LAMA5/IL1A/SFN/CASP7/LAMC3                                                                                                                                                                                                                                                                          |
| REACTOME_TOLL_LIKE_RECEPTOR_CASCADES | 2.0<br>510<br>105<br>11 | 0.0212<br>74503 | LBP/BIRC3/NOD2/TLR8/ITGAM/APOB/TICAM2/TLR6/SAA1/TLR2/S100A8/MAP3K8/ITGB2/TLR5/NFKB2/CD14/S100A9/CTSB/TLR9/TLR1/FOS/IRAK3/TLR7/CD36/CTSS/DUSP4/SOCS1/TICAM1/IKBKE/CD180/UNC93B1/FGG/PLCG2/CTSK/IRAK2/CTSL/LGMN/NFKB1/RIPK3/RPS6KA3/CASP8/MYD88/RIPK1/JUN/NFKBIA/S100A12/TRAF3/LY96/DUSP6/MAP2K3/IRF7/SFTPA1/TRAF6/TLR3/MEF2A/DUSP3/TLR4/MAPKAPK2/MAPK14/TIRAP/IRAK1/HSP90B1/BPI/BTK |
| BIOCARTA_TCYTOTOXIC_PATHWAY          | 2.0<br>502<br>104<br>09 | 0.0198<br>64398 | ICAM1/CD3E/CD3G/CD2/PTPRC/ITGB2/CD28/ITGAL/CD3D/CD247/CD8A                                                                                                                                                                                                                                                                                                                         |
| BIOCARTA_EICOSANOID_PATHWAY          | 2.0<br>482<br>451<br>51 | 0.0246<br>21212 | PTGS2/PTGER2/PTGFR/PTGES/PTGER4/PTGIS/PTGIR/PTGS1/ALOX5/ALOX5AP/TBXA2R/TBXAS1/CYSLTR1                                                                                                                                                                                                                                                                                              |
| PID_CXCR4_PATHWAY                    | 2.0<br>451<br>489<br>23 | 0.0198<br>64398 | ITGA2/ITGA11/CD3E/ITGA4/ITGA3/LCK/CD3G/ITGA5/PIK3R6/PTPRC/PIK3CG/ITGA10/PIK3CD/MMP9/CXCL12/PIK3R5/CD4/VAV1/ITGB1/BLK/STAT5A/PLCB2/HCK/LIMK1/ITGA1/SSH1/CD3D/STAT3/STAT2/FOXO1/CD247/LYN/PXN/ITGA7/PTPN6/ARR3/ITGA9/PLCB3/FGR/JAK2                                                                                                                                                  |
| PID_VEGFR1_2_PATHWAY                 | 2.0<br>411<br>898<br>66 | 0.0198<br>64398 | SH2D2A/MYOF/ITGB3/IQGAP1/GRB10/FES/VCL/CAV1/VEGFA/PRKCD/FLT1/NOS3/PXN/PTPN6/CDH5/PTPRJ/ROCK1/MAP2K3/KDR/PLCG1/PTPN2/MAPKAPK2/MAPK14/CBL/CTNNA1/PRKACA/ITGAV/AKT1/BRAF/NEDD4/PTK2B/PRKAA1/PIK3CA/PRKCA/DNM2/SHB/GRB2/HGS                                                                                                                                                            |

|                                                 |                         |                 |                                                                                                                                                                                                                              |
|-------------------------------------------------|-------------------------|-----------------|------------------------------------------------------------------------------------------------------------------------------------------------------------------------------------------------------------------------------|
| WP_AGERAGE_PATHWAY                              | 2.0<br>369<br>226<br>8  | 0.0198<br>64398 | MMP13/NOS2/MMP7/MMP14/SHC1/MMP9/STAT5A/MSN/MSR1/IRS1/NCF1/NFKB1/STAT3/CASP8/MYD88/FOX<br>O1/INHBB/PRKCD/JUN/LGALS3/NOS3/SP1/HIF1A/NFKBIA/ROCK1/SMAD3/JAK2/MAPK14/TIRAP/DIAPH1/INSR<br>/STAT1/IKBKB/AKT1/MMP2                 |
| REACTOME_ACYL_CHAIN_REMODELLING_OF_PS           | 2.0<br>359<br>144<br>06 | 0.0246<br>21212 | PLA2R1/PLA2G2A/PLA2G2F/MBOAT1/PLA2G4E/OSBPL10/PLA2G5/PLA2G2D/LPCAT3/PLA2G4D/PLA2G4F/OS<br>BPL5/PLA2G4B                                                                                                                       |
| WP_INTEGRINMEDIATED_CELL_ADHESION               | 2.0<br>335<br>121<br>77 | 0.0198<br>64398 | CAPN6/ITGA2/ITGA11/SHC1/ITGA4/ITGA3/ITGB4/ITGAM/ITGA5/ITGB3/ITGA10/ITGB2/VCL/RAC2/ITGAD/ITGB7<br>/ITGAL/MIR34C/ITGB1/CAV1/ITGB5/ZYX/TLN1/CAPN11/VAV2/ITGA1/MAPK4/PXN/ITGA7/TNS1/VASP/ITGAX/R<br>OCK1/ITGA9/MAP2K3/ROCK2/GIT2 |
| BIOCARTA_CLASSIC_PATHWAY                        | 2.0<br>283<br>515<br>74 | 0.0198<br>64398 | C1R/C1S/C3/C5/C7/C1QC/C1QA/C1QB/C2/C8A/C4A/C4B/C6                                                                                                                                                                            |
| REACTOME_INTERLEUKIN_RECEPTOR_SHC_SIG<br>NALING | 2.0<br>280<br>454<br>94 | 0.0198<br>64398 | CSF2/IL2RA/IL2RB/CSF2RB/SHC1/JAK3/IL2RG/PIK3CD/INPP5D/PTPN6/INPPL1/JAK2                                                                                                                                                      |
| WP_EBV_LMP1_SIGNALING                           | 2.0<br>276<br>264<br>81 | 0.0247<br>7454  | CCL20/CXCL8/NFKB2/CCL5/MAP3K14/TRAF1/NFKB1/NFKBIA/PDLIM7/MAP3K3/TRAF6/IRAK1/IFNB1/IKBKB/T<br>RADD                                                                                                                            |
| SA_B_CELL_RECEPTOR_COMPLEXES                    | 2.0<br>273<br>930<br>58 | 0.0198<br>64398 | PAPPA/SHC1/FOS/VAV1/SYK/VAV2/RPS6KA3/JUN/LYN                                                                                                                                                                                 |
| WP_FOLATE_METABOLISM                            | 2.0<br>273<br>722<br>36 | 0.0198<br>64398 | IL6/SAA4/SERPINE1/ICAM1/SOD2/SAA2/CCL2/APOB/LDLR/SAA1/IFNG/ABCA1/NFKB2/IL1B/SERPINA3/CSF1/<br>FGG/NFKB1/MAT1A/FOLR2/MTR/CRP/SOD3/GPX2/INSR/SHMT1/TP53/FOLR3/MTHFR/MTHFD1                                                     |



|                                                                                        |                         |                 |                                                                                                                                                                                                                                                                                                                                                                                                                                                                                                                                                                                                                                                                                                                                                                                                                                                                                                                                                                                    |
|----------------------------------------------------------------------------------------|-------------------------|-----------------|------------------------------------------------------------------------------------------------------------------------------------------------------------------------------------------------------------------------------------------------------------------------------------------------------------------------------------------------------------------------------------------------------------------------------------------------------------------------------------------------------------------------------------------------------------------------------------------------------------------------------------------------------------------------------------------------------------------------------------------------------------------------------------------------------------------------------------------------------------------------------------------------------------------------------------------------------------------------------------|
| REACTOME_TNF_RECEPTOR_SUPERFAMILY_TNF_SF_MEMBERS_MEDIATING_NON_CANONICAL_NF_KB_PATHWAY | 2.0<br>268<br>201<br>75 | 0.0198<br>64398 | TNFSF11/TNFSF14/BIRC3/LTB/TNFRSF11A/CD40LG/MAP3K14/CD40/LTBR/TRAF3/LTA                                                                                                                                                                                                                                                                                                                                                                                                                                                                                                                                                                                                                                                                                                                                                                                                                                                                                                             |
| BIOCARTA_NTHI_PATHWAY                                                                  | 2.0<br>259<br>990<br>77 | 0.0247<br>7454  | CXCL8/TGFBR2/IL1B/DUSP1/MAP3K14/NFKB1/MYD88/NFKBIA/SMAD3/MAP2K3/EP300/MAPK14/IKBKB/CREB<br>BP/TGFBR1/MAP3K7/TNF/NR3C1/RELA                                                                                                                                                                                                                                                                                                                                                                                                                                                                                                                                                                                                                                                                                                                                                                                                                                                         |
| REACTOME_DISEASES_OF_GLYCOSYLATION                                                     | 2.0<br>249<br>076<br>03 | 0.0198<br>92136 | THBS1/KERA/SBSPON/LUM/SDC1/MUCL1/SPON2/ADAMTS1/ADAMTS2/B4GALT1/MUC3A/ADAMTS14/HSPG2<br>/BGN/ADAMTS3/ADAMTSL4/ADAMTS12/ADAMTSL1/NOTCH3/GPC4/CHSY1/ADAMTS9/MUC1/SLC26A2/ADAM<br>TSL5/NOTCH2/ADAMTS16/OGN/GALNT12/GALNT3/HEXB/THBS2/CTSA/PAPSS2/MGAT2/GPC1/ADAMTS4/GP<br>C5/CFP/ADAMTS13/ADAMTS7/AGRN/PRELP/SDC2/FMOD/CHST14/MUC13/GPC6/VCAN/SDC4/EXT1/DCN/CH<br>ST3/GLB1/EXT2                                                                                                                                                                                                                                                                                                                                                                                                                                                                                                                                                                                                        |
| WP_RELATIONSHIP_BETWEEN_INFLAMMATION_COX2_AND_EGFR                                     | 2.0<br>219<br>577<br>41 | 0.0198<br>64398 | PTGS2/MMP1/PTGER2/PTGER4/PIK3CG/PIK3CD/ESR1                                                                                                                                                                                                                                                                                                                                                                                                                                                                                                                                                                                                                                                                                                                                                                                                                                                                                                                                        |
| WP_RESISTIN_AS_A_REGULATOR_OF_INFLAMMATION                                             | 2.0<br>209<br>442<br>24 | 0.0198<br>64398 | IL6/RETN/CXCL8/PIK3CG/PIK3CD/IL12B/PLCB2/PLCG2/NFKB1/NFKBIA/PLCE1/PLCG1/PLCB3/MAPK14                                                                                                                                                                                                                                                                                                                                                                                                                                                                                                                                                                                                                                                                                                                                                                                                                                                                                               |
| WP_VEGFAVEGFR2_SIGNALING_PATHWAY                                                       | 2.0<br>184<br>206<br>14 | 0.0408<br>93152 | PTGS2/DKK1/CXCL8/CCN1/MMP10/ICAM1/TNXB/SOD2/ADAMTS1/MMP14/FN1/SELE/CCL2/SH2D2A/SHC1/TN<br>FRSF10C/PLAUR/EPHA2/ITGB3/CYBB/IGFBP3/IQGAP1/EGR1/P4HA2/RCAN1/MYH9/FHL2/NRP2/TXNDC5/PTP<br>N14/MYO1C/GRB10/CGNL1/EGR3/STAT6/NDRG1/ADAMTS9/HLX/VCL/NCF2/NR4A1/ADAM9/SLC2A14/PLAU/C<br>CN2/PRKG1/NEXN/HBEGF/ENG/ITGB1/CAV1/ITGB5/ERN1/MOV10/TPP1/PLOD3/NR4A2/VEGFA/F3/NFATC2/F<br>GG/HDAC7/RHOJ/VAV2/LMAN1/NR4A3/FHOD1/LIMK1/DUSP5/NCF1/NFKB1/TMOD3/STAT3/CALU/HSPA1A/FL<br>II/KATNAL2/FOXO1/PTPN9/PRKCD/ARNT/SRF/PLA2G5/JUN/GPC1/FGD5/FLT1/NOS3/ARF6/C15orf39/PXN/AC<br>ACB/SLC8A1/PRKD2/P4HB/KL/PTPN6/CDH5/MKNK1/NFKBIA/PTPRJ/ADAM10/MYH11/ROCK1/NFATC1/MAP2<br>K3/INPP4B/ROCK2/NUMB/FOXO3/ANXA1/HSPB1/KDR/DLL4/PLCG1/PLCB3/EIF4G1/ASCC3/CTNND1/PALM2A<br>KAP2/PDIA6/MAP3K5/FAS/SEMA6D/SMARCA2/MMRN2/ADRB2/JAG1/MAPKAPK2/MAPK14/FAM120A/BRD4/A<br>RHGEF15/ERG/TEAD4/RCN1/IER5/TRAF3IP2/PRRC2C/FMNL3/CBL/TPM3/CALR/CTNNA1/STAT1/SND1/EEA1/<br>CCRL2/ITGAV/CAPN2/ABL1/SDCBP/PTPN1/TNFRSF25 |

|                                    |                         |                 |                                                                                                                                                                                                                                                    |
|------------------------------------|-------------------------|-----------------|----------------------------------------------------------------------------------------------------------------------------------------------------------------------------------------------------------------------------------------------------|
| WP_PI3KAKTMTOR_VITD3_SIGNALLING    | 2.0<br>168<br>189<br>99 | 0.0246<br>21212 | VDR/HK3/SLC2A3/IL10/CD80/CYP24A1/CD86/RXRA/PFKFB4/HLA-DRA/AKT1/PIK3CA/LDHA/MTOR                                                                                                                                                                    |
| PID_SYNDECAN_2_PATHWAY             | 2.0<br>158<br>878<br>97 | 0.0198<br>64398 | CSF2/CXCL8/LAMA3/ITGA2/FN1/ITGA5/LAMA1/TGFB1/ITGB1/TNFRSF13B/PRKCD                                                                                                                                                                                 |
| WP_PROLACTIN_SIGNALING_PATHWAY     | 2.0<br>132<br>675<br>47 | 0.0198<br>64398 | NOS2/PRLR/CISH/SHC1/SOCS3/TEC/PIK3CG/ERBB2/FLNA/ZAP70/FOS/VAV1/ITGB1/STAT5A/SOCS1/IRS1/AV2/IRF1/NFKB1/IRS2/STAT3/JUN/PXN/PTPN6/NFKBIA/CTSD                                                                                                         |
| PID_SMAD2_3NUCLEAR_PATHWAY         | 2.0<br>110<br>302<br>19 | 0.0198<br>64398 | COL1A2/VDR/SERPINE1/RUNX1/LAMC1/RUNX2/GATA3/CDKN2B/IGHA1/CEBPB/IL10/FOS/ESR1/ITGB5/DLX1/CDKN1A/FOXO1/RUNX3/JUN/SKI/SP1/SMAD3/FOXO3/EP300/IRF7/SIN3A/ATF3/PIAS3/CITED1/FOXH1/TFE3/SIN3B/IFNB1/AR/AKT1/FOXG1/SP3/CREBBP/TFDP1/CDK2                   |
| KEGG_TYPE_I_DIABETES_MELLITUS      | 2.0<br>100<br>131<br>63 | 0.0198<br>64398 | FASLG/PRF1/IFNG/CD80/HLA-DQA1/CD28/HLA-DOA/IL1B/IL12B/HLA-DQA2/HLA-DQB1/IL1A/GZMB/HLA-DPA1/HLA-C/HLA-B/HLA-DRB1/HLA-F/HLA-DPB1/HLA-E/LTA/CD86/FAS/HLA-DMA/HLA-DOB/HLA-G                                                                            |
| WP_VIRAL_ACUTE_MYOCARDITIS         | 2.0<br>037<br>628<br>99 | 0.0198<br>64398 | IL6/LAMA2/NOD2/CCR5/CCR3/IFNG/KRT8/IL10/CD80/ITGB2/TLR5/NFKB2/MMP9/RAC2/CD4/IL12B/ITGAL/TGFB1/CAV1/CD40LG/SOCS1/TICAM1/ABL2/STAT3/CASP8/CASP7/CASP1/CASP2/DMD/MICA/EIF4G1/CD55/TLR3/HLA-DMA/TLR4/CXCR4/AIF1/RASA1/BNIP2/STAT1/ABL1/DAG1/AKT1/CASP6 |
| WP_COVID19_ADVERSE_OUTCOME_PATHWAY | 2.0<br>026<br>166<br>65 | 0.0198<br>64398 | CSF3/IL6/IL2RA/CXCL8/CCL2/IL10/IL1B/CXCL10                                                                                                                                                                                                         |
| PID_FCER1_PATHWAY                  | 2.0<br>007<br>103<br>31 | 0.0198<br>64398 | IGHE/ITK/SHC1/FCGR2B/LCP2/FOS/VAV1/DUSP1/SYK/HCLS1/WIPF1/NFATC2/NFKB1/JUN/LYN/FCER1G/PXN/PLCG1/SPHK1/BTK/RASA1/CBL/PLD2/LAT/IKBKB/MS4A2/AKT1/LAT2/PIK3CA/SOS1/DOK1/FER/GRB2                                                                        |

|                                       |                         |                 |                                                                                                                                                                                                                                                                                                                                                                                                                            |
|---------------------------------------|-------------------------|-----------------|----------------------------------------------------------------------------------------------------------------------------------------------------------------------------------------------------------------------------------------------------------------------------------------------------------------------------------------------------------------------------------------------------------------------------|
| KEGG_ASTHMA                           | 1.9<br>957<br>613<br>3  | 0.0198<br>64398 | CCL11/IL10/HLA-DQA1/HLA-DOA/HLA-DQA2/HLA-DQB1/CD40LG/RNASE3/HLA-DPA1/CD40/FCER1G/HLA-DRB1/HLA-DPB1/HLA-DMA/HLA-DOB/HLA-DRA/MS4A2                                                                                                                                                                                                                                                                                           |
| REACTOME_SARS_COV_INFECTIONS          | 1.9<br>929<br>246<br>92 | 0.0198<br>64398 | IL1R1/ITGA4/JAK3/ST3GAL1/FURIN/IL6R/TLR9/IL1RAP/TLR7/ITGB1/ST6GALNAC2/VEGFA/PARP14/PARP10/C<br>TSL/PDCD1/PARP4/RIPK1/ATP1A1/CYSLTR1/ROCK1/TYK2/ROCK2/GANAB/JAK2/IMPDH1/TMPRSS2/BRD4/M<br>GAT1/PARP9                                                                                                                                                                                                                        |
| PID_PI3KCI_PATHWAY                    | 1.9<br>920<br>753<br>77 | 0.0198<br>64398 | ITK/LCK/PIK3R6/PIK3CG/PIK3CD/PIK3R5/ZAP70/DAPP1/BLK/SYK/HCK/PLCG2/LYN/ARF6/FOXO3/INPPL1/PLC<br>G1/CYTH3/FGR                                                                                                                                                                                                                                                                                                                |
| WP_APOPTOSIS_MODULATION_AND_SIGNALING | 1.9<br>898<br>447<br>27 | 0.0198<br>64398 | IL1R1/FASLG/IL1R2/BIRC3/TNFRSF10C/TNFRSF10A/TNFRSF10D/TNFRSF1B/NAIP/FOS/BLK/CASP4/BCL2A1/<br>TNFRSF10B/MAP3K14/NFKB1/MCL1/CASP8/HSPA1A/MYD88/CASP7/RIPK1/JUN/BMF/CASP1/TNFSF10/CFLA<br>R/AIFM2/CASP10/TNFRSF1A/CASP2/NFKBIA/TRAF3/PIDD1/BCL2L11/PMAIP1/TRAF6/MAP3K5/FAS/CDKN2A/I<br>RAK1/TP53/TNFRSF11B                                                                                                                    |
| ST_INTERFERON_GAMMA_PATHWAY           | 1.9<br>894<br>247<br>54 | 0.0198<br>64398 | REG1A/CISH/PTPRU/PLA2G2A/IFNG                                                                                                                                                                                                                                                                                                                                                                                              |
| BIOCARTA_NFKB_PATHWAY                 | 1.9<br>883<br>911<br>98 | 0.0246<br>21212 | IL1R1/TNFAIP3/TNFRSF1B/IL1A/MAP3K14/NFKB1/MYD88/RIPK1/TNFRSF1A/NFKBIA/TRAF6                                                                                                                                                                                                                                                                                                                                                |
| WP_HEPATITIS_B_INFECTION              | 1.9<br>881<br>974<br>41 | 0.0212<br>74503 | IL6/CXCL8/FASLG/JAK3/HSPG2/TGFBR2/EGR2/TICAM2/MAPK13/TGFB2/TLR2/EGR3/NFATC4/PIK3CD/STAT6<br>/MMP9/CREB3L1/FOS/TGFB1/STAT5A/TICAM1/IKBKE/NFATC2/CREB3L2/CDKN1A/TGFB3/NFKB1/STAT3/CAS<br>P8/STAT2/MYD88/JUN/CASP10/TRAF3/DDX58/SMAD3/NFATC1/IFNA5/IFNA14/IFIH1/TYK2/MAP2K3/NFATC3/E<br>P300/IRF7/JAK2/IFNAR1/MAVS/TRAF6/TLR3/FAS/TLR4/MAPK14/TIRAP/IRAK1/ARAF/DDB2/DDX3X/STAT1/IFN<br>B1/IKKBK/AKT1/BRAF/CREBBP/PTK2B/IFNA17 |
| BIOCARTA_TNFR2_PATHWAY                | 1.9<br>871<br>691<br>62 | 0.0198<br>64398 | TNFAIP3/TNFRSF1B/DUSP1/MAP3K14/TRAF1/NFKB1/RIPK1/NFKBIA/TRAF3                                                                                                                                                                                                                                                                                                                                                              |

|                                           |                         |                 |                                                                                                                                                                                                                                                                                                                                                                     |
|-------------------------------------------|-------------------------|-----------------|---------------------------------------------------------------------------------------------------------------------------------------------------------------------------------------------------------------------------------------------------------------------------------------------------------------------------------------------------------------------|
| PID_BCR_5PATHWAY                          | 1.9<br>853<br>969<br>63 | 0.0198<br>64398 | SHC1/FCGR2B/PTPRC/FOS/DAPP1/CD72/BCL2A1/SYK/SH3BP5/MAP4K1/PLCG2/VAV2/NFKB1/JUN/LYN/CARD11/MALT1/PTPN6/NFKBIA/POU2F2/NFATC1/TRAF6/IBTK/MAPK14/BTK/RASA1/BCL10/IKBKB/AKT1/PTEN/CD79A/PIK3CA/MAP3K7/BLNK/SOS1/ETS1/DOK1                                                                                                                                                |
| REACTOME_IRAK4_DEFICIENCY_TLR2_4_         | 1.9<br>825<br>034<br>48 | 0.0198<br>64398 | TLR6/TLR2/CD14/TLR1/CD36/MYD88/LY96/TLR4/TIRAP/BTK                                                                                                                                                                                                                                                                                                                  |
| BIOCARTA_CASPASE_PATHWAY                  | 1.9<br>812<br>591<br>21 | 0.0246<br>21212 | BIRC3/PRF1/CASP4/LMNA/GZMB/CASP8/CASP7/CASP1/CASP10/CASP2                                                                                                                                                                                                                                                                                                           |
| REACTOME_PEPTIDE_LIGAND_BINDING_RECEPTORS | 1.9<br>802<br>377<br>62 | 0.0239<br>07265 | CCL13/CCL11/CCL20/CXCL13/XCR1/CXCL5/CCR8/CCL7/BDKRB1/FPR2/CCR2/CCR4/CXCR3/PPBP/CXCR1/CXCL8/CXCL3/MC3R/UTS2/CCL23/CXCL1/PROK2/BDKRB2/CCL2/CXCL2/CCL22/INSL3/FPR3/AGTR2/F2RL1/C5AR1/PROKR1/CXCR5/NPY2R/CCR7/CCR5/CCR6/CXCL6/NTS/CXCL9/CCR1/C3/SAA1/F2RL3/CCR3/CXCR2/CXCR6/CXCL12/C5AR2/CCL5/HCRTR1/TAC3/F2RL2/FPR1/C3AR1/GRPR/C5/QRFP/PYY/XCL2/KISS1R/ECE1/AGTR1/OXTR |
| PID_AMB2_NEUTROPHILS_PATHWAY              | 1.9<br>796<br>047<br>89 | 0.0198<br>64398 | IL6/ICAM1/SELP/PLAUR/LCK/ITGAM/LRP1/APOB/ITGB2/MMP9/PLAU/CCN2/BLK/TLN1/HCK/NFKB1/LYN                                                                                                                                                                                                                                                                                |
| ST_STAT3_PATHWAY                          | 1.9<br>787<br>79        | 0.0198<br>64398 | REG1A/IL6/CISH/PTPRU/JAK3/IL6R/STAT3/JAK2/PIAS3                                                                                                                                                                                                                                                                                                                     |
| KEGG_ANTIGEN_PROCESSING_AND_PRESENTATION  | 1.9<br>742<br>372<br>17 | 0.0198<br>64398 | KIR2DL1/CIITA/KIR2DL4/IFI30/HLA-DQA1/CTSB/HLA-DOA/CD4/HLA-DQA2/HLA-DQB1/CTSS/TAPBP/CTSL/HSPA1B/LGMN/HLA-DPA1/PDIA3/HLA-C/KIR2DS4/CD74/HSPA6/HSPA1A/KIR3DL2/HLA-B/HLA-DRB1/TAP1/KIR3DL1/HSPA5/HLA-F/HLA-DPB1/CD8A/KLRD1/IFNA5/IFNA14/HLA-E/LTA/HLA-DMA/KIR2DL3/HLA-DOB/CALR/TAP2/HLA-G                                                                               |
| REACTOME_SIGNALING_BY_LEPTIN              | 1.9<br>712<br>405<br>91 | 0.0198<br>64398 | LEP/SOCS3/STAT5A/IRS1/IRS2/STAT3/JAK2                                                                                                                                                                                                                                                                                                                               |

|                                                                         |                         |                 |                                                                                                                                                                                                                                                                                                                                                                                                                                                                                                                                                                                                                                                             |
|-------------------------------------------------------------------------|-------------------------|-----------------|-------------------------------------------------------------------------------------------------------------------------------------------------------------------------------------------------------------------------------------------------------------------------------------------------------------------------------------------------------------------------------------------------------------------------------------------------------------------------------------------------------------------------------------------------------------------------------------------------------------------------------------------------------------|
| WP_TGFB_SIGNALING_IN_THYROID_CELLS_FOR_EPITHELIALMESENCHYMAL_TRANSITION | 1.9<br>700<br>897<br>69 | 0.0198<br>64398 | FN1/SNAI2/RUNX2/TNC/TGFB1/CDH6/CDH2/VIM/SMAD3                                                                                                                                                                                                                                                                                                                                                                                                                                                                                                                                                                                                               |
| WP_FOCAL_ADHESIONPI3KAKTMTORSIGNALING_PATHWAY                           | 1.9<br>678<br>082<br>65 | 0.0340<br>05146 | THBS1/COL1A1/COL1A2/GNGT1/CSF3/COL5A1/IL2RA/COL6A2/COL3A1/IL7R/LAMB1/LAMA3/FOXA1/TNXB/NOS2/ITGA2/MET/IL2RB/COL5A2/PRLR/LAMA2/ITGA11/FN1/ITGA4/JAK3/LAMC1/IBSP/ITGA3/OSMR/EPHA2/SLC2A3/TNC/TCL1A/ITGB4/FGF19/IL2RG/IL4R/LAMC2/COMP/ITGA5/ITGB3/FGF10/COL4A1/COL4A2/PIK3CG/ITGA10/THBS3/LAMA4/CSF3R/FGFR1/LAMA1/ITGB2/PIK3CD/IL6R/VEGFC/PIK3R5/COL5A3/OSM/CREB3L1/ITGAD/EFNA5/TNN/CSF1R/ITGB7/ITGAL/EGF/ITGB1/ITGB5/LAMB2/PDGFRB/LAMA5/CSF1/FLT4/VEGFA/EPAS1/CREB3L2/IRS1/CDKN1A/THBS2/IRS2/VWF/FOXO1/LAMC3/PFKFB3/F2R/FGF11/FLT1/NOS3/ITGA7/TBC1D1/PDGFD/HIF1A/SLC2A1/ITGAX/ANGPT1/HGF/ANGPT2/GYS1/ITGA9/SPP1/FOXO3/KDR/KITLG/PDGFA/LAMB3/SREBF1/JAK2/IFNAR1 |
| WP_DIFFERENTIATION_PATHWAY                                              | 1.9<br>669<br>347<br>67 | 0.0198<br>64398 | IL6/DKK1/CXCR1/FST/IL11/INHBA/TNFSF11/WNT3A/FGF10/ALK/IL6R/CSF1R/GDF5/TGFB1/EGF/CSF1/VEGFA/NT5E/TGFB3                                                                                                                                                                                                                                                                                                                                                                                                                                                                                                                                                       |
| BIOCARTA_IL4_PATHWAY                                                    | 1.9<br>649<br>190<br>06 | 0.0198<br>64398 | SHC1/JAK3/IL2RG/IL4R/STAT6/IRS1                                                                                                                                                                                                                                                                                                                                                                                                                                                                                                                                                                                                                             |
| REACTOME_DAP12_INTERACTIONS                                             | 1.9<br>612<br>379<br>23 | 0.0198<br>64398 | CD300E/GRAP2/SHC1/TREM1/LCK/SIGLEC15/CLEC5A/CD300LB/LCP2/SIGLEC14/SYK/SIRPB1/PLCG2/VAV2/HLA-C/KIR2DS4/HLA-B/KLRD1/PLCG1/HLA-E                                                                                                                                                                                                                                                                                                                                                                                                                                                                                                                               |
| PID_AVB3_OPN_PATHWAY                                                    | 1.9<br>607<br>183<br>1  | 0.0198<br>64398 | ITGB3/CD44/MMP9/PLAU/FOS/SYK/MAP3K14/NFKB1/JUN/NFKBIA/SPP1/ROCK2/ITGAV/MMP2/PTK2B/GSN/AV3/PIK3CA/PIP5K1A                                                                                                                                                                                                                                                                                                                                                                                                                                                                                                                                                    |
| REACTOME_ANCHORING_FIBRIL_FORMATION                                     | 1.9<br>598<br>030<br>91 | 0.0198<br>64398 | COL1A1/COL1A2/LAMA3/COL7A1/LAMC2/COL4A1/COL4A2/BMP1                                                                                                                                                                                                                                                                                                                                                                                                                                                                                                                                                                                                         |

|                                                                |                         |                 |                                                                                                                                                                                                                                                                                                                                                                                                                                                                                                                                                                                                                                                                   |
|----------------------------------------------------------------|-------------------------|-----------------|-------------------------------------------------------------------------------------------------------------------------------------------------------------------------------------------------------------------------------------------------------------------------------------------------------------------------------------------------------------------------------------------------------------------------------------------------------------------------------------------------------------------------------------------------------------------------------------------------------------------------------------------------------------------|
| REACTOME_TNFR2_NON_CANONICAL_NF_KB_PATHWAY                     | 1.9<br>555<br>927<br>76 | 0.0198<br>64398 | CD70/FASLG/TNFRSF18/TNFSF11/TNFSF14/TNFRSF9/BIRC3/TNFSF4/TNFSF15/LTB/TNFRSF11A/TNFRSF1B/RELB/CD27/NFKB2/TNFRSF17/TNFSF8/EDA2R/CD40LG/TNFRSF14/TNFRSF8/MAP3K14/TNFRSF13B/TNFSF13/CD40/TNFRSF1A/LTBR/TRAF3/TNFRSF4/PSME4/LTA                                                                                                                                                                                                                                                                                                                                                                                                                                        |
| WP_MATRIX_METALLOPROTEINASES                                   | 1.9<br>539<br>014<br>19 | 0.0198<br>64398 | MMP1/MMP10/MMP13/MMP7/MMP14/MMP19/MMP8/TIMP1/MMP11/MMP12/MMP9/MMP3/MMP25                                                                                                                                                                                                                                                                                                                                                                                                                                                                                                                                                                                          |
| REACTOME_GLYCOSAMINOGLYCAN_METABOLISM                          | 1.9<br>535<br>305<br>14 | 0.0198<br>64398 | KERA/LUM/LYVE1/HS3ST3B1/SDC1/HAS3/CEMIP/HAS1/B4GALT1/HSPG2/BGN/CHSY3/ST3GAL1/DSE/GPC4/CD44/CHSY1/CHST13/SLC26A2/HPSE/HS3ST3A1/GUSB/CHST2/STAB2/OGN/GNS/HGSNAT/B3GNT2/SLC9A1/CHPF2/HEXB/CHST7/PAPSS2/GPC1/GALNS/HS6ST1/GPC5/CSGALNACT2/SGSH/XYL2/AGRN/PRELP/SDC2/FMOD/CHST14/CHPF/GPC6/VCAN/ARSB/B3GNT3/SDC4/EXT1/CHST15/DCN/CHST3/B4GALT5/GLB1/EXT2/IDUA/HAS2                                                                                                                                                                                                                                                                                                     |
| REACTOME_HYALURONAN_UPTAKE_AND_DEGRADATION                     | 1.9<br>534<br>231<br>65 | 0.0198<br>64398 | LYVE1/CD44/GUSB/STAB2/SLC9A1/HEXB                                                                                                                                                                                                                                                                                                                                                                                                                                                                                                                                                                                                                                 |
| BIOCARTA_TCRA_PATHWAY                                          | 1.9<br>527<br>765<br>88 | 0.0198<br>64398 | CD3E/LCK/CD3G/PTPRC/ZAP70/CD4/CD3D/CD247/HLA-DRB1                                                                                                                                                                                                                                                                                                                                                                                                                                                                                                                                                                                                                 |
| REACTOME_DISEASES_ASSOCIATED_WITH_GLYCOSAMINOGLYCAN_METABOLISM | 1.9<br>527<br>348<br>32 | 0.0198<br>64398 | KERA/LUM/SDC1/B4GALT1/HSPG2/BGN/GPC4/CHSY1/SLC26A2/OGN/HEXB/PAPSS2/GPC1/GPC5/AGRN/PRELP/SDC2/FMOD/CHST14/GPC6/VCAN/SDC4/EXT1/DCN/CHST3/EXT2                                                                                                                                                                                                                                                                                                                                                                                                                                                                                                                       |
| KEGG_PATHWAYS_IN_CANCER                                        | 1.9<br>471<br>683<br>9  | 0.0329<br>51051 | PTGS2/MMP1/IL6/CXCL8/CBLCLAMB1/LAMA3/NOS2/FASLG/ITGA2/MET/FZD1/LAMA2/FN1/BIRC3/RUNX1/WNT3A/LAMC1/ITGA3/GLI1/FZD7/FGF19/GLI3/LAMC2/TGFBR2/GLI2/CDKN2B/FZD8/FGF10/COL4A1/NTRK1/COL4A2/PIK3CG/FZD5/ERBB2/TGFB2/LAMA4/CSF3R/FGFR1/LAMA1/RASSF5/PIK3CD/NFKB2/MMP9/VEGFC/FLT3/PIK3R5/RAC2/FOS/PML/LEF1/CSF1R/TGFB1/EGF/ITGB1/STAT5A/LAMB2/JUP/PDGFRB/TRAF5/LAMA5/VEGFA/EPAS1/PLCG2/CDKN1A/NKX3-1/TRAF1/TGFB3/NFKB1/STAT3/CASP8/SPI1/FOXO1/LAMC3/ARNT/JUN/RALBP1/FGF11/STK36/FZD10/SMO/FGF5/HIF1A/CDK6/PPARD/NFKBIA/SLC2A1/TRAF3/FZD2/SMAD3/HGF/FZD4/EP300/PLCG1/KITLG/PDGFA/FZD6/LAMB3/TRAF6/FAS/MECOM/TPR/PIAS3/CDKN2A/LAMB4/FLT3LG/PTCH2/ITGA2B/STK4/IGF1R/HSP90B1/TP |

|                                                        |                         |                 |                                                                                                                                                                                                                                                                                                                                                                                                                                                                                                                                                                                                                                  |
|--------------------------------------------------------|-------------------------|-----------------|----------------------------------------------------------------------------------------------------------------------------------------------------------------------------------------------------------------------------------------------------------------------------------------------------------------------------------------------------------------------------------------------------------------------------------------------------------------------------------------------------------------------------------------------------------------------------------------------------------------------------------|
|                                                        |                         |                 | 53/TCF7/RXRA/CBL/ARAF/TPM3/WNT1/CTNNA1/STAT1/ITGAV/IKBKB/AR/PDGFB/PPARG/SHH/ABL1/PAX8/FGF7/CCNE1/WNT5B/AKT1/MMP2/BRAF/CREBBP                                                                                                                                                                                                                                                                                                                                                                                                                                                                                                     |
| REACTOME_PLATELET_ACTIVATION_SIGNALING_AND_AGGREGATION | 1.9<br>469<br>365<br>29 | 0.0287<br>31884 | THBS1/COL1A1/COL1A2/ORM1/GNGT1/F13A1/SERPINE1/PPBP/ITPR3/FN1/SELP/CD109/SHC1/SERPINA1/ACTN1/LCK/TOR4A/ITGB3/TIMP1/PIK3R6/A2M/PIK3CG/TGFB2/SERPING1/F2RL3/PHACTR2/PROS1/FLNA/GNA15/VCL/VEGFC/RARRES2/PIK3R5/LHFPL2/LCP2/RAC2/ECM1/VAV1/F2RL2/TGFB1/EGF/CD36/SERPINA3/PDPN/CTSW/GAS6/SYK/TLN1/TRPC7/PLEK/VEGFA/P2RY1/FERMT3/FGG/PLCG2/VAV2/TBXA2R/TGFB3/STXPB2/GP1BA/ACTN4/CALU/CFD/SRGN/VWF/PRKCD/GNA14/LYN/FCER1G/F2R/ITPR2/PECAM1/ADRA2A/PTPN6/HSPA5/LGALS3BP/PF4/HGF/QSOX1/RASGRP1/APBB1IP/APLP2/MPIG6B/SYTL4/PDGFA                                                                                                            |
| BIOCARTA_ERYTH_PATHWAY                                 | 1.9<br>452<br>243<br>13 | 0.0198<br>64398 | CSF2/CSF3/IL6/IL11/TGFB2/FLT3/TGFB1/IL1A/TGFB3                                                                                                                                                                                                                                                                                                                                                                                                                                                                                                                                                                                   |
| WP_PI3KAKT_SIGNALING_PATHWAY                           | 1.9<br>443<br>123<br>07 | 0.0356<br>83216 | COL6A5/COL6A3/THBS1/COL1A1/COL1A2/GNGT1/CSF3/IL6/IL2RA/COL6A2/NTF3/IL7R/LAMB1/COL6A1/LAMA3/TNXB/FASLG/ITGA2/MET/IL2RB/PCK1/PRLR/LAMA2/ITGA11/FN1/ITGA4/JAK3/LAMC1/IBSP/ITGA3/OSMR/EPHA2/TNC/TCL1A/ITGB4/FGF19/IL2RG/IL4R/LAMC2/COMP/ITGA5/ITGB3/PIK3R6/FGF10/COL4A1/NTRK1/COL4A2/PIK3CG/ITGA10/THBS3/LAMA4/TLR2/CSF3R/FGFR1/LAMA1/PIK3CD/IL6R/VEGFC/PIK3AP1/FLT3/PIK3R5/OSM/CREB3L1/EFNA5/TNN/CSF1R/ITGB7/EGF/ITGB1/ITGB5/LAMB2/PDGFRB/SYK/LAMA5/CSF1/FLT4/VEGFA/CREB3L2/IRS1/ITGA1/CDKN1A/THBS2/NFKB1/PCK2/MCL1/VWF/LAMC3/F2R/FGF11/FLT1/NOS3/ITGA7/FGF5/PDGFD/CDK6/ANGPT1/PKN3/HGF/ANGPT2/GYS1/IFNA5/ITGA9/SPP1/IFNA14/BCL2L11 |
| WP_ESTROGEN_SIGNALING_PATHWAY                          | 1.9<br>439<br>933<br>81 | 0.0247<br>7454  | GNGT1/FOS/ESR1/NFKB1/JUN/SP1/MAPK14/PRKACA/IKBKB/AKT1/BRAF/PIK3CA/BCL2                                                                                                                                                                                                                                                                                                                                                                                                                                                                                                                                                           |
| BIOCARTA_TCR_PATHWAY                                   | 1.9<br>400<br>977<br>34 | 0.0198<br>64398 | CD3E/SHC1/LCK/CD3G/PIK3CG/NFATC4/PTPN7/ZAP70/FOS/VAV1/NFATC2/CD3D/NFKB1/CD247/JUN/NFKB1A/NFATC1/NFATC3/PLCG1                                                                                                                                                                                                                                                                                                                                                                                                                                                                                                                     |
| SIG_IL4RECEPTOR_IN_B_LYPHOCYTES                        | 1.9<br>383<br>958<br>14 | 0.0198<br>64398 | SHC1/JAK3/IL4R/PIK3CD/STAT6/SOCS1/MAP4K1/IRS1/IRS2                                                                                                                                                                                                                                                                                                                                                                                                                                                                                                                                                                               |
| REACTOME_INFECTION_WITH_MYCOBACTERIUM_TUBERCULOSIS     | 1.9<br>369              | 0.0198<br>64398 | MRC1/NOS2/CTSG/LTF/TLR2/RNF213                                                                                                                                                                                                                                                                                                                                                                                                                                                                                                                                                                                                   |

|                                                                      |                         |                 |                                                                                                                                                                                                                                                                                                                    |
|----------------------------------------------------------------------|-------------------------|-----------------|--------------------------------------------------------------------------------------------------------------------------------------------------------------------------------------------------------------------------------------------------------------------------------------------------------------------|
|                                                                      | 063<br>36               |                 |                                                                                                                                                                                                                                                                                                                    |
| KEGG_LYSOSOME                                                        | 1.9<br>356<br>622<br>73 | 0.0198<br>64398 | CTSG/CTSZ/TCIRG1/SLC11A1/IGF2R/CTSC/CTSB/GAA/MAN2B1/GUSB/CTSS/TPP1/CTSW/GNS/HGSNAT/CD68/LAPTM5/LAMP3/CTSK/HEXB/CTSL/CTSA/LGMN/ACP5/FUCA1/NAGA/GBA/GALNS/CTSD/ARSG/MANBA/LAMP1/PLA2G15/NPC2/SGSH/ACP2/CD164/AP4E1/NPC1/ARSB/M6PR/SORT1/SUMF1/GLB1/GM2A/AP1S3/AP1B1/IDUA/AP3D1/HEXA/CTNS/GGA2/AP3B1/ARSA/GALC/DNASE2 |
| WP_TCELL_RECEPTOR_AND_COSTIMULATORY_SIGNALING                        | 1.9<br>330<br>232<br>7  | 0.0198<br>64398 | ITK/LCK/CTLA4/CD28/ZAP70/NFATC2/PDCD1/NFKB1/PTPN6/NFKBIA/CD8A/RASGRP1/PLCG1/RASA1/AKT1/IL2/PTEN/CD8B/DYRK2                                                                                                                                                                                                         |
| ST_GAQ_PATHWAY                                                       | 1.9<br>246<br>470<br>69 | 0.0250<br>51994 | ITPR3/CFB/NFKB2/NFKB1/ITPR2/NFKBIA/PHKA2/PLD2/GRK2/DAG1/AKT1/TONSL/ITPKB/PIK3CB/PLD3/PITX2/AKT2/PDPK1/IKBKG                                                                                                                                                                                                        |
| PID_INTEGRIN5_PATHWAY                                                | 1.9<br>246<br>321<br>76 | 0.0198<br>64398 | CCN1/FBN1/SDC1/FN1/ITGA4/PLAUR/VCAM1/PLAU/ITGB7/ITGB5                                                                                                                                                                                                                                                              |
| WP_HEMATOPOIETIC_STEM_CELL_GENE_REGULATION_BY_GABP_ALPHABETA_COMPLEX | 1.9<br>228<br>522<br>12 | 0.0329<br>21564 | FLT3/ETV6/GZMB/MCL1/ZFX/FOXO3/EP300/DNMT3A/DNMT1/ATM/CREBBP/PTEN/BCL2                                                                                                                                                                                                                                              |
| WP_DEVELOPMENT_AND_HETEROGENEITY_OF_THE_ILC_FAMILY                   | 1.9<br>171<br>192<br>59 | 0.0198<br>64398 | IL6/EOMES/TSLP/AREG/GATA3/IL22/IFNG/GFI1/IL1B/IL12B/IL15/RORA/IL25                                                                                                                                                                                                                                                 |
| WP_PHOTODYNAMIC_THERAPYINDUCED_AP1_SURVIVAL_SIGNALING                | 1.9<br>158<br>652<br>83 | 0.0198<br>64398 | IL6/FASLG/BCL3/MAPK13/IFNG/JUNB/FOS/HBEGF/TRAF5/CDKN1A/MCL1/JUN/BMF/TNFSF10/CFLAR/TNFRSF1A/BCL2L11/MAP2K3/TRAF6/MAP3K5/FAS/MAPK14/CDKN2A/TP53/FGF7/CCNE1/NFE2L2/MMP2                                                                                                                                               |
| WP_IL10_ANTIINFLAMMATORY_SIGNALING_PATHWAY                           | 1.9<br>132              | 0.0239<br>69653 | IL6/IL10/IL10RA/IL1A/HMOX1/STAT3/STAT2/IL10RB/STAT1                                                                                                                                                                                                                                                                |



|                                                              |                         |                 |                                                                                                                                                                                                                                                                                                                       |
|--------------------------------------------------------------|-------------------------|-----------------|-----------------------------------------------------------------------------------------------------------------------------------------------------------------------------------------------------------------------------------------------------------------------------------------------------------------------|
|                                                              | 460<br>18               |                 |                                                                                                                                                                                                                                                                                                                       |
| SA_CASPASE_CASCADE                                           | 1.9<br>110<br>796<br>42 | 0.0239<br>86691 | FASLG/BIRC3/PRF1/GZMB/CASP8/CASP7/CASP10/SREBF1/FAS                                                                                                                                                                                                                                                                   |
| WP_THE_HUMAN_IMMUNE_RESPONSE_TO_TUBERCULOSIS                 | 1.9<br>089<br>074<br>94 | 0.0339<br>69215 | SOCS1/MX1/IRF1/STAT2/IFITM1/TAP1/MED14/TYK2/PTPN2/JAK2/IFNAR1/OAS1/IRF9/STAT1/PIAS1/IFNGR2                                                                                                                                                                                                                            |
| WP_NANOPARTICLEMEDIATED_ACTIVATION_OF_RECEPTOR_SIGNALING     | 1.9<br>072<br>391<br>64 | 0.0250<br>51994 | COL1A1/FN1/AREG/MAPK13/PIK3CD/ITGB1/TLN1/ITGA1/PXN                                                                                                                                                                                                                                                                    |
| WP_EPITHELIAL_TO_MESENCHYMAL_TRANSITION_IN_COLORECTAL_CANCER | 1.9<br>033<br>728<br>61 | 0.0212<br>71459 | DLK1/CLDN23/FZD1/FN1/CLDN4/SNAI2/SHC1/WNT3A/FZD7/TWIST2/TGFBR2/CLDN19/ITGA5/NOTCH3/FZD8/LATS2/COL4A1/COL4A2/FZD5/NRP2/MAPK13/TGFB2/CLDN24/CLDN1/PIK3CD/MMP9/CLDN3/TGFB1/TWIST1/NOTCH2/JUP/CLDN18/GDF15/TGFB3/CDH2/CLDN7/FZD10/HIF1A/FOXC2/FZD2/SMAD3/CLDN14/CLDN2/FZD4/MAP2K3/DLL4/CTDSP1/FZD6/PKD1/TRAF6/JAG1/MAPK14 |
| KEGG_B_CELL_RECEPTOR_SIGNALING_PATHWAY                       | 1.9<br>026<br>021<br>39 | 0.0198<br>64398 | CR2/LILRB3/FCGR2B/PIK3CG/NFATC4/PIK3CD/PIK3AP1/PIK3R5/RAC2/FOS/VAV1/DAPP1/CD72/SYK/NFATC2/INPP5D/PLCG2/VAV2/NFKB1/JUN/LYN/CARD11/IFITM1/MALT1/PTPN6/NFKBIA/NFATC1/NFAT5/NFATC3                                                                                                                                        |
| WP_PHOTODYNAMIC_THERAPYINDUCED_HIF1_SURVIVAL_SIGNALING       | 1.9<br>012<br>135<br>42 | 0.0198<br>64398 | PTGS2/SERPINE1/NOS2/SLC2A3/IGFBP3/BCL2A1/VEGFA/TGFB3/MCL1/ARNT/IGFBP1/HIF1A/SLC2A1/ANGPT1/ANGPT2/PMAIP1/PFKL/TP53/HK1                                                                                                                                                                                                 |
| WP_VITAMIN_D_IN_INFLAMMATORY_DISEASES                        | 1.9<br>005<br>660<br>87 | 0.0335<br>62823 | VDR/IL6/DUSP1/NFKB1/NFKBIA/SMAD3/NFATC1/MED14/MAP2K3/MAPK14/RXRRA/IKBKB                                                                                                                                                                                                                                               |
| WP_MESODERMAL_COMMITMENT_PATHWAY                             | 1.8<br>977              | 0.0208<br>68055 | GATA6/HMGA2/DKK1/FOXA1/INHBA/EOMES/ADAM19/KLF5/WNT3A/BHLHE40/GATA3/ZIC5/FZD8/FZD5/ZIC2/FOXA2/YAP1/ARID5B/TBX1/FGFR1/LEF1/MIR200A/ATP8B2/RARG/ELK4/SRF/TRIM5/AHDC1/ZFH4/KLF4/PLC                                                                                                                                       |

|                                                    |                         |                 |                                                                                                                                                                                                                                                      |
|----------------------------------------------------|-------------------------|-----------------|------------------------------------------------------------------------------------------------------------------------------------------------------------------------------------------------------------------------------------------------------|
|                                                    | 957<br>92               |                 | H1/FOXC2/SMAD1/SMAD3/FZD4/POU5F1/MACF1/FOXC1/TWGS1/HAND1/WDHD1/ASCC3/TEAD1/JAK2/KDM6A/EXT1/FOXH1/NCAPG2/BCORL1/CEP250/EXT2/SNAI1/SLC2A12/UBR5/LEFTY2/AEBP2/PRKACA/C6orf201                                                                           |
| REACTOME_RUNX2_REGULATES_BONE_DEVELOPMENT          | 1.8<br>962<br>319<br>38 | 0.0198<br>64398 | COL1A1/RUNX2/GLI3/GLI2/YAP1/WWTR1/SATB2/SMAD1/MAF/ZNF521                                                                                                                                                                                             |
| PID_CD40_PATHWAY                                   | 1.8<br>947<br>891<br>38 | 0.0198<br>64398 | TNFAIP3/BIRC3/JAK3/STAT5A/CD40LG/MAP3K14/TRAF1/NFKB1/CD40/JUN/NFKBIA/TRAF3/TRAF6/MAPK14/FAMR                                                                                                                                                         |
| WP_TRANSCRIPTION_FACTOR_REGULATION_IN_ADIPOGENESIS | 1.8<br>942<br>029<br>73 | 0.0335<br>62823 | IL6/LEP/CEBPB/CEBPD/TWIST1/IRS1/NRIP1/PCK2/IRS2/FOXO1                                                                                                                                                                                                |
| BIOCARTA_STEM_PATHWAY                              | 1.8<br>927<br>949<br>51 | 0.0198<br>64398 | CSF2/CSF3/IL6/CXCL8/IL11/CD4/CSF1                                                                                                                                                                                                                    |
| WP_CANONICAL_AND_NONCANONICAL_TGFB_SIGNALING       | 1.8<br>890<br>614<br>66 | 0.0239<br>69653 | LOX/LOXL4/LOXL1/LOXL2/TGFBR2/BMP1/TGFB1                                                                                                                                                                                                              |
| REACTOME_TCR_SIGNALING                             | 1.8<br>879<br>105<br>58 | 0.0198<br>64398 | ITK/TRAV29DV5/CD3E/TRAV8-4/GRAP2/TRAV19/PTPN22/LCK/CD3G/TRBV7-9/TRAT1/PTPRC/TRBV12-3/HLA-DQA1/FYB1/ZAP70/LCP2/CD4/HLA-DQB2/HLA-DQA2/HLA-DQB1/WAS/INPP5D/PLCG2/HLA-DPA1/CD3D/NFKB1/CD247/CARD11/MALT1/VASP/HLA-DRB1/NFKBIA/PTPRJ/HLA-DPB1/PSME4/PLCG1 |
| KEGG_AUTOIMMUNE_THYROID_DISEASE                    | 1.8<br>868<br>380<br>53 | 0.0198<br>64398 | FASLG/CTLA4/PRF1/IL10/CD80/HLA-DQA1/CD28/HLA-DOA/HLA-DQA2/HLA-DQB1/CD40LG/GZMB/HLA-DPA1/HLA-C/CD40/HLA-B/HLA-DRB1/HLA-F/HLA-DPB1/IFNA5/IFNA14/HLA-E/CD86/FAS/HLA-DMA                                                                                 |
| BIOCARTA_CD40_PATHWAY                              | 1.8<br>863              | 0.0198<br>64398 | TNFAIP3/DUSP1/CD40LG/MAP3K14/NFKB1/CD40/NFKBIA/TRAF3/TRAF6/IKKB                                                                                                                                                                                      |

|                                                          |                         |                 |                                                                                                                                                                                                                                                                                                                                                             |
|----------------------------------------------------------|-------------------------|-----------------|-------------------------------------------------------------------------------------------------------------------------------------------------------------------------------------------------------------------------------------------------------------------------------------------------------------------------------------------------------------|
|                                                          | 210<br>19               |                 |                                                                                                                                                                                                                                                                                                                                                             |
| REACTOME_THE_ACTIVATION_OF_ARYLSULFATASES                | 1.8<br>858<br>840<br>13 | 0.0239<br>07265 | ARSI/ARSJ/ARSD/STS/ARSF/ARSG/ARSB/SUMF1/ARSL/ARSA                                                                                                                                                                                                                                                                                                           |
| PID_PDGFBRB_PATHWAY                                      | 1.8<br>850<br>670<br>53 | 0.0198<br>64398 | SHC1/LCK/LRP1/ITGB3/IQGAP1/PIK3R6/PIK3CG/GRB10/ARPC1B/PIK3CD/PIK3R5/SLA/FOS/BLK/STAT5A/PDGFRB/SIPA1/HCK/VAV2/RPS6KA3/ACTN4/STAT3/SFN/PRKCD/SRF/JUN/LYN/ACTA2/ARAP1/WASF2/PTPRJ/MYOCD/PLCG1/PTPN2/FGR/TAGLN/JAK2/SPHK1/RASA1/CBL/ACTR2/STAT1/ITGAV/PDGFB/ABL1/PTPN1/DOCK4/BRAF/PTEN/PIK3CA/WASL/SOS1/DOK1/PRKCA/DNM2/CTTN/PIK3CB/ACTR3/GRB2/EPS8/STAT5B/AFDN |
| REACTOME_ACYL_CHAIN_REMODELLING_OF_PI                    | 1.8<br>840<br>548<br>31 | 0.0239<br>69653 | PLA2R1/PLA2G2A/PLA2G2F/PLBD1/PLA2G4E/PLA2G5/PLA2G2D/MBOAT7/PLA2G4D/PLA2G4F                                                                                                                                                                                                                                                                                  |
| REACTOME_TOLL_LIKE_RECEPTOR_4_TLR4_CASCADE               | 1.8<br>839<br>807<br>3  | 0.0198<br>64398 | LBP/BIRC3/NOD2/ITGAM/TICAM2/TLR6/SAA1/TLR2/MAP3K8/ITGB2/NFKB2/CD14/TLR1/FOS/IRAK3/CD36/DUSP4/SOCS1/TICAM1/IKBKE/CD180/PLCG2/IRAK2/NFKB1/RIPK3/RPS6KA3/CASP8/MYD88/RIPK1/JUN/NFKBIA/S100A12/TRAF3/LY96/DUSP6/MAP2K3/IRF7/SFTPA1/TRAF6/MEF2A/DUSP3/TLR4/MAPKAPK2/MAPK14/TIRAP/IRAK1/BPI/BTK                                                                   |
| BIOCARTA_HIVNEF_PATHWAY                                  | 1.8<br>836<br>950<br>02 | 0.0198<br>64398 | FASLG/BIRC3/TNFRSF1B/LMNA/MAP3K14/TRAF1/NFKB1/CASP8/CASP7/RIPK1/PRKCD/CFLAR/TNFRSF1A/CASP2/NFKBIA/MAP3K5/FAS/RASA1/PRKDC/ARHGDI3/CDK11A/CASP6/GSN/TRADD/NUMA1/BCL2/CASP3/TNFR2/TRAF2/RELA/XIAP/PAK2/LMNB2/CDK11B/FADD/APAF1                                                                                                                                 |
| WP_ARYL_HYDROCARBON_RECEPTOR_PATHWAY                     | 1.8<br>836<br>870<br>42 | 0.0198<br>64398 | CYP1B1/MYOF/SERPINB2/IFNG/JUNB/ALDH3A1/IL1B/IL12B/TGFB1/ARNT/JUN/CES3/IGFBP1/EP300/MGST1/GSTA2/NFE2L2/IL2/HES1/UGT1A1/UGT1A7/NCOA1                                                                                                                                                                                                                          |
| WP_TRANSCRIPTION_COFACTORS_SKI_AND_SKIL_PROTEIN_PARTNERS | 1.8<br>834<br>455<br>93 | 0.0239<br>69653 | LATS2/TEAD3/MERTK/SKI/SATB2/TEAD1/SIN3A/TEAD4/STK3/LATS1/MECP2                                                                                                                                                                                                                                                                                              |
| REACTOME_SMOOTH_MUSCLE_CONTRACTION                       | 1.8<br>826              | 0.0198<br>64398 | MYL10/VCL/ACTG2/CALD1/MYL7/ITGB5/TLN1/ANXA2/MYL9/ITGA1/DYSF/TPM2/PXN/TPM4/ACTA2/MYH11/ANXA1                                                                                                                                                                                                                                                                 |

|                                                               |                         |                 |                                                                                                                                                                                                                                                              |
|---------------------------------------------------------------|-------------------------|-----------------|--------------------------------------------------------------------------------------------------------------------------------------------------------------------------------------------------------------------------------------------------------------|
|                                                               | 004<br>79               |                 |                                                                                                                                                                                                                                                              |
| WP_ESTROGEN_RECEPTOR_PATHWAY                                  | 1.8<br>817<br>715<br>24 | 0.0239<br>07265 | CYP1B1/PCK1/ESR1/STAT3/JUN/SP1                                                                                                                                                                                                                               |
| WP_MAMMARY_GLAND_DEVELOPMENT_PATHWAY_PUBERTY_STAGE_2_OF_4     | 1.8<br>810<br>368<br>58 | 0.0239<br>07265 | FN1/AREG/TIMP1/FOSL1/ERBB2/ESR1/EGF/STAT5A/NRIP1/VIM                                                                                                                                                                                                         |
| REACTOME_RIPK1_MEDIATED_REGULATED_NECROSIS                    | 1.8<br>807<br>537<br>2  | 0.0329<br>21564 | FASLG/BIRC3/TNFRSF10A/MLKL/TNFRSF10B/RIPK3/CASP8/RIPK1/TNFSF10/CFLAR                                                                                                                                                                                         |
| REACTOME_DISEASES_ASSOCIATED_WITH_O_GLYCOSYLATION_OF_PROTEINS | 1.8<br>805<br>707<br>36 | 0.0198<br>64398 | THBS1/SBSPON/MUCL1/SPON2/ADAMTS1/ADAMTS2/MUC3A/ADAMTS14/ADAMTS3/ADAMTSL4/ADAMTS12/ADAMTSL1/NOTCH3/ADAMTS9/MUC1/ADAMTSL5/NOTCH2/ADAMTS16/GALNT12/GALNT3/THBS2/ADAMTS4/CFP/ADAMTS13/ADAMTS7                                                                    |
| WP_IL3_SIGNALING_PATHWAY                                      | 1.8<br>803<br>880<br>84 | 0.0198<br>64398 | CXCL8/CSF2RB/SHC1/CCR3/PIK3CD/FOS/VAV1/TGFB1/STAT5A/SYK/HCK/INPP5D/STAT3/JUN/LYN/PTPN6/JAK2/CD86                                                                                                                                                             |
| BIOCARTA_IL10_PATHWAY                                         | 1.8<br>786<br>281<br>02 | 0.0239<br>07265 | IL6/IL10/IL10RA/STAT5A/IL1A/HMOX1/STAT3/IL10RB/STAT1                                                                                                                                                                                                         |
| PID_CMYB_PATHWAY                                              | 1.8<br>783<br>040<br>25 | 0.0198<br>64398 | COL1A2/PTGS2/ANPEP/BIRC3/GATA3/IQGAP1/LYZ/CEBPB/PIM1/CEBPD/CD4/ELANE/LEF1/CSF1R/ZFH3/LECT2/CDKN1A/TFEC/SPI1/SKI/SP1/CDK6/MAF/EP300/KITLG/SIN3A/GSTM1/SMARCA2/PIAS3/CDKN2A/PRTN3/GATA1/WNT1/CA1/SND1/CD34/CASP6/CREBBP/MCM4/TAB2/HES1/NCOR1/ADORA2B/BCL2/ETS2 |
| REACTOME_INTERLEUKIN_6_SIGNALING                              | 1.8<br>779              | 0.0239<br>07265 | IL6/SOCS3/IL6R/STAT3/TYK2/JAK2/CBL/STAT1/IL6ST                                                                                                                                                                                                               |

|                                                                |                         |                 |                                                                                                                                                                                                      |
|----------------------------------------------------------------|-------------------------|-----------------|------------------------------------------------------------------------------------------------------------------------------------------------------------------------------------------------------|
|                                                                | 984<br>33               |                 |                                                                                                                                                                                                      |
| PID_TNF_PATHWAY                                                | 1.8<br>728<br>168<br>63 | 0.0198<br>64398 | TNFAIP3/BIRC3/TNFRSF1B/NRK/CAV1/TRAF1/NFKB1/CASP8/RIPK1/TNFRSF1A/MAP3K3/MAP2K3/RFFL/MAP3K5/ADAM17/SQSTM1/STAT1/IKKBK/NSMAF/CYLD/MAP4K2/TRADD/TAB2/MAP3K7/SMPD1                                       |
| KEGG_APOPTOSIS                                                 | 1.8<br>714<br>437<br>41 | 0.0198<br>64398 | IL1R1/FASLG/CSF2RB/BIRC3/TNFRSF10C/TNFRSF10A/TNFRSF10D/NTRK1/PIK3CG/PIK3CD/PIK3R5/IL1B/IL1RAP/IRAK3/TNFRSF10B/IL1A/IRAK2/MAP3K14/NFKB1/CASP8/MYD88/CASP7/RIPK1/TNFRSF10/CFLAR/CASP10/TNFRSF1A/NFKBIA |
| REACTOME_O_GLYCOSYLATION_OF_TSR_DOMA<br>IN_CONTAINING_PROTEINS | 1.8<br>704<br>358<br>03 | 0.0198<br>64398 | THBS1/SBSPON/SPON2/ADAMTS1/ADAMTS2/ADAMTS14/ADAMTS3/ADAMTSL4/ADAMTS12/ADAMTSL1/ADAMTSL9/ADAMTSL5/ADAMTS16/THBS2/ADAMTS4/CFP/ADAMTS13/ADAMTS7                                                         |
| WP_INTERFERON_TYPE_I_SIGNALING_PATHWAY<br>S                    | 1.8<br>703<br>779<br>33 | 0.0198<br>64398 | SOCS3/LCK/PTPRC/PIK3CD/REL/ZAP70/VAV1/STAT5A/SOCS1/IRS1/IRS2/STAT3/STAT2/PTPN6/TYK2/MAP2K3/IFNAR1/PIAS3/MAPK14/CBL/IRF9/STAT1/RPS6KA4                                                                |
| REACTOME_ACYL_CHAIN_REMODELLING_OF_PC                          | 1.8<br>682<br>412<br>03 | 0.0198<br>64398 | PLA2R1/PLA2G2A/PLA2G2F/PLBD1/PLA2G4E/PLB1/PLA2G5/PLA2G2D/LPCAT3/PLA2G4D/PLA2G4F/PLA2G4B/LPCAT1                                                                                                       |
| REACTOME_RUNX2_REGULATES_OSTEOLAST_<br>DIFFERENTIATION         | 1.8<br>667<br>532<br>67 | 0.0247<br>7454  | COL1A1/RUNX2/GLI3/YAP1/WWTR1/SATB2/MAF/ZNF521                                                                                                                                                        |
| REACTOME_NCAM1_INTERACTIONS                                    | 1.8<br>656<br>553<br>6  | 0.0198<br>64398 | COL6A5/COL6A3/COL5A1/COL6A2/COL3A1/COL6A1/COL5A2/ST8SIA4/COL4A1/COL4A2/COL5A3/ARTN                                                                                                                   |
| WP_GASTRIN_SIGNALING_PATHWAY                                   | 1.8<br>643              | 0.0198<br>64398 | PTGS2/SERPINE1/CXCL8/MMP7/BIRC3/SHC1/SERPINE2/EGR1/CD44/RHOD/HDC/CLDN1/FOS/ITGB1/ANXA2/VEGFA/SLC9A1/HDAC7/IRS1/CDKN1A/NFKB1/STAT3/FOXO1/PRKCD/JUN/PXN/KLF4/SP1/PRKD2/NFKBIA/RO                       |

|                                                                     |                         |                 |                                                                                                                                                                                                                                                                                                                                                                                                                                                                                                   |
|---------------------------------------------------------------------|-------------------------|-----------------|---------------------------------------------------------------------------------------------------------------------------------------------------------------------------------------------------------------------------------------------------------------------------------------------------------------------------------------------------------------------------------------------------------------------------------------------------------------------------------------------------|
|                                                                     | 497<br>4                |                 | CK1/FOXO3/PLCG1/JAK2/JAG1/ARHGEF28/MAPK14/CDKN2A/SLC9A3/PRKCH/MAP3K11/PRKACA/IKBKB/PPARG/MEF2D                                                                                                                                                                                                                                                                                                                                                                                                    |
| WP_NOVEL_INTRACELLULAR_COMPONENTS_OF_RIGILIKE_RECEPTOR_RLR_PATHWAY  | 1.8<br>640<br>767<br>85 | 0.0198<br>64398 | CXCL8/MAPK13/IFNG/CXCL12/IKBKE/STING1/IFNE/NFKB1/CXCL10/CASP8/RIPK1/CASP10/NFKBIA/TRAF3/NLRX1/DDX58/IFIH1/IRF7/MAVS/TRAF6/TRIM25/DHX58/MAPK14/DDX3X/IFNB1/IKBKB/CYLD                                                                                                                                                                                                                                                                                                                              |
| REACTOME_DISEASES_OF_METABOLISM                                     | 1.8<br>615<br>662<br>75 | 0.0268<br>29213 | THBS1/KERA/SBSPON/LUM/CYP1B1/SDC1/MUCL1/SPON2/ADAMTS1/ADAMTS2/CSF2RB/B4GALT1/CYP4F22/MUC3A/ADAMTS14/HSPG2/BGN/ADAMTS3/ADAMTSL4/ADAMTS12/ADAMTSL1/NOTCH3/GPC4/SLC34A2/CHSY1/ADAMTS9/MUC1/SLC26A2/GAA/ADAMTSL5/NOTCH2/GUSB/SLC35D1/ADAMTS16/OGN/GNS/GALNT12/HGSNAT/GALNT3/HEXB/THBS2/CTSA/LCT/PAPSS2/MAT1A/MGAT2/OPLAH/GPC1/GBE1/GCLM/GALNS/ADAMTS4/TBXAS1/GPC5/CFP/ADAMTS13/HLCS/SFTP/SGSH/GYS1/MTR/ADAMTS7/AGRN/PRELP/CYP24A1/CUBN/SDC2/FMOD/SFTP/CHST14/MUC13/GPC6/VCAN/ARSB/SDC4/EXT1/DCN/CHST3 |
| REACTOME_IL_6_TYPE_CYTOKINE_RECEPTOR_LIGAND_INTERACTIONS            | 1.8<br>609<br>269<br>25 | 0.0239<br>69653 | IL31RA/LIF/IL11/CLCF1/OSMR/OSM                                                                                                                                                                                                                                                                                                                                                                                                                                                                    |
| PID_HNF3A_PATHWAY                                                   | 1.8<br>587<br>263<br>36 | 0.0198<br>64398 | GCG/FOXA1/SERPINA1/APOB/C4BPB/FOXA2/FOXA3/CEBPB/COL18A1/FOS/ESR1/NRIP1/NKX3-1/JUN/NFIC/SP1/NR2F2/EP300/SFTP/PRDM15/BRCA1/AP1B1/NCOA3/TFF1/AR/SHH                                                                                                                                                                                                                                                                                                                                                  |
| WP_APOPTOSISRELATED_NETWORK_DUE_TO_ALTERED_NOTCH3_IN_OVARIAN_CANCER | 1.8<br>586<br>308<br>93 | 0.0198<br>64398 | THBS1/IL7R/SOCS3/BCL3/IER3/ERN1/YBX3/TNFRSF10B/CDKN1A/TRAF1/NRG1/NFKB1/CASP7/F2R/VIM/HSPA5/HELLS/HSPB1/SQSTM1/CTNNA1/CARD14/ABL1/APP/AKT1/CUL1/PTK2B                                                                                                                                                                                                                                                                                                                                              |
| WP_NAD_METABOLISM_SIRTUINS_AND_AGING                                | 1.8<br>551<br>887<br>67 | 0.0239<br>07265 | ROS1/NAMPT/NFKB1/FOXO1/HIF1A/FOXO3                                                                                                                                                                                                                                                                                                                                                                                                                                                                |
| REACTOME DISSOLUTION_OF_FIBRIN_CLOT                                 | 1.8<br>537<br>572<br>48 | 0.0239<br>07265 | SERPINE1/PLAUR/SERPINB2/PLAU/ANXA2/SERPINB8                                                                                                                                                                                                                                                                                                                                                                                                                                                       |

|                                              |                         |                 |                                                                                                                                                                                                                                                                                                            |
|----------------------------------------------|-------------------------|-----------------|------------------------------------------------------------------------------------------------------------------------------------------------------------------------------------------------------------------------------------------------------------------------------------------------------------|
| BIOCARTA_ASBCCELL_PATHWAY                    | 1.8<br>520<br>303<br>24 | 0.0239<br>07265 | FASLG/IL10/CD80/CD28/CD4/CD40LG/CD40/HLA-DRB1/FAS/HLA-DRA/IL2                                                                                                                                                                                                                                              |
| BIOCARTA_MAPK_PATHWAY                        | 1.8<br>517<br>725<br>89 | 0.0198<br>64398 | SHC1/MAPK13/TGFB2/MAP3K8/MAP3K6/FOS/TGFB1/MAP4K1/MAP3K14/TGFB3/NFKB1/MKNK2/RPS6KA3/RI<br>PK1/MAPK4/JUN/SP1/MKNK1/NFKBIA/MAP3K3/MAP2K3/MAP3K12/MAP3K5/MAPKAPK2/MAPK14/STAT1/MAP<br>3K2/MAP3K11/RPS6KA4/IKBKB/MAP4K2/TRADD/RPS6KA1/MAPK7/TGFBR1/MAP3K7/GRB2/RPS6KA2/MAX/T<br>RAF2/RPS6KB1/RELA/PAK2/MAPKAPK3 |
| WP_AOPOPTOSIS                                | 1.8<br>517<br>309<br>26 | 0.0198<br>64398 | FASLG/BIRC3/TNFRSF1B/PRF1/IRF4/CASP4/TNFRSF10B/IRF1/GZMB/TRAF1/NFKB1/MCL1/CASP8/CASP7/RI<br>PK1/JUN/CASP1/TNFSF10/CFLAR/CASP10/TNFRSF1A/CASP2/IRF6/NFKBIA/TRAF3/HELLS/BCL2L11/PMAIP1/<br>LTA/IRF7/IRF5/FAS/TP63/CDKN2A/IGF1R/TP53/SCAF11/IRF2/IKBKB/TNFRSF25/AKT1/CASP6/TRADD/IGF1                         |
| WP_EPO_RECEPTOR_SIGNALING                    | 1.8<br>515<br>075<br>2  | 0.0198<br>64398 | CISH/PTPRU/SHC1/PTPRC/PIK3CG/STAT5A/SOCS1/IRS1/IRS2/STAT3                                                                                                                                                                                                                                                  |
| REACTOME_GP1B_IX_V_ACTIVATION_SIGNALLIN<br>G | 1.8<br>448<br>529<br>48 | 0.0239<br>07265 | COL1A1/COL1A2/FLNA/GP1BA/VWF                                                                                                                                                                                                                                                                               |
| ST_B_CELL_ANTIGEN_RECEPTOR                   | 1.8<br>442<br>957<br>64 | 0.0198<br>64398 | PI3/SHC1/PIK3CD/NFKB2/VAV1/SYK/PLCG2/NFKB1/LYN/NFKBIA/NFAT5/BTK/DAG1/AKT1/PIK3CA/TONSL/BL<br>NK/SOS1/ITPKB/GRB2/CD19/CSK                                                                                                                                                                                   |
| BIOCARTA_P53HYPOXIA_PATHWAY                  | 1.8<br>438<br>028<br>23 | 0.0510<br>20408 | HIC1/IGFBP3/FHL2/CDKN1A/HSPA1A/HIF1A/GADD45A/TAF1/EP300/TP53/ATM/AKT1/DNAJB1                                                                                                                                                                                                                               |
| WP_SMALL_CELL_LUNG_CANCER                    | 1.8<br>418<br>814<br>44 | 0.0198<br>64398 | PTGS2/LAMB1/LAMA3/NOS2/ITGA2/LAMA2/FN1/BIRC3/LAMC1/ITGA3/LAMC2/CDKN2B/COL4A1/COL4A2/LAM<br>A4/LAMA1/PIK3CD/GADD45B/ITGB1/LAMB2/TRAF5/LAMA5/CDKN1A/TRAF1/NFKB1/CASP8/LAMC3/CDK6/NFK<br>BIA/TRAF3/GADD45A                                                                                                    |

|                                                                                                   |                         |                 |                                                                                                                                                                            |
|---------------------------------------------------------------------------------------------------|-------------------------|-----------------|----------------------------------------------------------------------------------------------------------------------------------------------------------------------------|
| PID_INTEGRIN_A4B1_PATHWAY                                                                         | 1.8<br>417<br>127<br>76 | 0.0198<br>64398 | THBS1/FN1/ITGA4/JAML/VCAM1/CD14/ITGB1/TLN1/THBS2/ADAM28/ARF6/PXN/SPP1                                                                                                      |
| WP_LEPTIN_SIGNALING_PATHWAY                                                                       | 1.8<br>414<br>662<br>31 | 0.0198<br>64398 | LEP/IL1RN/CISH/SHC1/SOCS3/ERBB2/REL/IL1B/ESR1/PLCG2/IRS1/NFKB1/STAT3/FOXO1/NOS3/SP1/ACACB/ROCK1/ROCK2/PLCG1/JAK2/MAPK14/STAT1/IKKBK/PTPN1/SOCS2/AKT1/RPS6KA1/PTEN/PRKAA1   |
| WP_FAS_LIGAND_FASL_PATHWAY_AND_STRESS_INDUCTION_OF_HEAT_SHOCK_PROTEINS_HSP_REGULATION             | 1.8<br>410<br>368<br>94 | 0.0198<br>64398 | FASLG/MIR34C/IL1A/LMNA/CASP8/CASP7/JUN/CFLAR/CASP10/HSPB1/FAS/MAPKAPK2/ACTA1/PRKDC/ARHGDIB/CASP6/BCL2/MAP3K7/ACTB/NFX1/CASP3/TNF/PAK2/MAPKAPK3/LMNB2/FADD/APAF1            |
| WP_NETRINUNC5B_SIGNALING_PATHWAY                                                                  | 1.8<br>408<br>370<br>49 | 0.0198<br>64398 | COL1A1/ICAM1/SELE/CCL2/ITGB4/YAP1/VCAM1/IL10/CCN2/INPP5D/IL1A/JUN/NEO1/CDH5/UNC5B/DCSTAMP/KDR/MAPK14/ARHGEF12/TP53                                                         |
| REACTOME_TRAF3_DEPENDENT_IRF_ACTIVATION_PATHWAY                                                   | 1.8<br>391<br>550<br>63 | 0.0239<br>07265 | IKBKE/RNF135/TRAF3/DDX58/IFIH1/EP300/IRF7/MAVS/TRIM25/IFNB1/CREBBP                                                                                                         |
| REACTOME_REGULATION_BY_C_FLIP                                                                     | 1.8<br>390<br>659<br>57 | 0.0239<br>07265 | FASLG/TNFRSF10A/TNFRSF10B/CASP8/RIPK1/TNFSF10/CFLAR/FAS                                                                                                                    |
| REACTOME_NUCLEOTIDE_BINDING_DOMAIN_LEUCINE_RICH_REPEAT_CONTAINING_RECEPTOR_NLR_SIGNALING_PATHWAYS | 1.8<br>371<br>548       | 0.0198<br>64398 | TNFAIP3/MEFV/BIRC3/NOD2/MAPK13/NFKB2/NLRC4/CASP4/NLRP3/IRAK2/NFKB1/CASP8/CARD9/PSTPIP1/CASP1/CASP2/AIM2/TRAF6/MAPK14/IRAK1/TAB3/IKKBK/CYLD/APP/TAB2/BCL2/MAP3K7/PYCARD/UBC |
| BIOCARTA_CYTOKINE_PATHWAY                                                                         | 1.8<br>348<br>503<br>29 | 0.0329<br>21564 | IL6/CXCL8/IFNG/IL10/IL15/IL1A/IL16                                                                                                                                         |
| REACTOME_INTERLEUKIN_21_SIGNALING                                                                 | 1.8<br>347              | 0.0239<br>07265 | IL21R/JAK3/IL2RG/STAT5A/STAT3                                                                                                                                              |



|                                                                      |                         |                 |                                                                                                                                                                                                                                                 |
|----------------------------------------------------------------------|-------------------------|-----------------|-------------------------------------------------------------------------------------------------------------------------------------------------------------------------------------------------------------------------------------------------|
|                                                                      | 274<br>61               |                 |                                                                                                                                                                                                                                                 |
| WP_INTERLEUKIN11_SIGNALING_PATHWAY                                   | 1.8<br>272<br>984<br>12 | 0.0198<br>64398 | IL11/ICAM1/ITGA2/SOCS3/RUNX2/IBSP/FES/TGFB1/STAT3/TYK2/JAK2/PIAS3/STAT1/IKBKB/AKT1/IL6ST/RPS6KA1/BCL2/PIAS1                                                                                                                                     |
| KEGG_PRION_DISEASES                                                  | 1.8<br>271<br>911<br>18 | 0.0198<br>64398 | IL6/LAMC1/EGR1/IL1B/CCL5/C5/C7/IL1A/C1QC/C1QA/C1QB/HSPA1A/HSPA5/C8A                                                                                                                                                                             |
| KEGG_VIRAL_MYOCARDITIS                                               | 1.8<br>252<br>376<br>56 | 0.0198<br>64398 | ICAM1/LAMA2/MYH9/PRF1/MYH4/CD80/ITGB2/HLA-DQA1/CD28/HLA-DOA/RAC2/ITGAL/HLA-DQA2/HLA-DQB1/CAV1/CD40LG/ABL2/HLA-DPA1/HLA-C/CASP8/CD40/HLA-B/HLA-DRB1/DMD/MYH11/HLA-F/HLA-DPB1/HLA-E/EIF4G1/CD55/CD86/HLA-DMA/HLA-DOB/HLA-G/MYH3/ABL1/HLA-DRA/DAG1 |
| REACTOME_MUCOPOLYSACCHARIDOSES                                       | 1.8<br>239<br>513<br>79 | 0.0323<br>06543 | GUSB/GNS/HGSNAT/GALNS/SGSH/ARSB/GLB1/IDUA                                                                                                                                                                                                       |
| WP_PROTEOGLYCAN_BIOSYNTHESIS                                         | 1.8<br>216<br>939<br>21 | 0.0239<br>69653 | CHSY1/SLC26A2/PAPSS2/EXTL3/XYL2/CHST14/CANT1/EXT1/CHST3/EXT2/SLC35B3                                                                                                                                                                            |
| WP_METABOLIC_PATHWAY_OF_LDL_HDL_AND_TRIGLUCERIDES_INCLUDING_DISEASES | 1.8<br>202<br>217<br>31 | 0.0198<br>64398 | LIPG/APOA2/APOB/LDLR/ABCA1/ANXA2/LPL/MTTP                                                                                                                                                                                                       |
| PID_ARF6_TRAFFICKING_PATHWAY                                         | 1.8<br>175<br>232<br>78 | 0.0198<br>64398 | IL2RA/ITGA2/ITGA11/ITGA4/ITGA3/ITGA5/ITGA10/ITGB1/AGTR1/ITGA1/ASAP2/ARF6/ITGA7/ITGA9/ACAP1/CTNND1/ADRB2/PLD2/CTNNA1/ITGA8/ITGAV/SCAMP2                                                                                                          |
| PID_REG_GR_PATHWAY                                                   | 1.8<br>147              | 0.0198<br>64398 | CSF2/MMP1/IL6/CXCL8/ICAM1/SELE/GATA3/EGR1/IFNG/NR4A1/FOS/STAT5A/KRT17/FKBP5/FGG/IRF1/CDKN1A/NFKB1/PCK2/SFN/SPI1/JUN/KRT5/NFATC1                                                                                                                 |

|                                                                                   |                         |                 |                                                                                                                                                                                                                                                                                                              |
|-----------------------------------------------------------------------------------|-------------------------|-----------------|--------------------------------------------------------------------------------------------------------------------------------------------------------------------------------------------------------------------------------------------------------------------------------------------------------------|
|                                                                                   | 223<br>76               |                 |                                                                                                                                                                                                                                                                                                              |
| BIOCARTA_CSK_PATHWAY                                                              | 1.8<br>145<br>581<br>24 | 0.0329<br>21564 | CD3E/LCK/CD3G/PTPRC/ZAP70/CD4/CD3D/CD247/HLA-DRB1                                                                                                                                                                                                                                                            |
| BIOCARTA_RELA_PATHWAY                                                             | 1.8<br>133<br>914<br>83 | 0.0239<br>69653 | TNFRSF1B/NFKB1/RIPK1/TNFRSF1A/NFKBIA/EP300/TRAF6/IKBKB/CREBBP/TRADD/TNF/RELA/FADD/IKBKG                                                                                                                                                                                                                      |
| REACTOME_O_LINKED_GLYCOSYLATION                                                   | 1.8<br>131<br>096<br>42 | 0.0198<br>64398 | THBS1/GALNT5/SBSPON/GCNT1/GALNT4/MUCL1/SPON2/ADAMTS1/ADAMTS2/MUC3A/ADAMTS14/ADAMTS3/B3GNT8/ADAMTSL4/ADAMTS12/ADAMTSL1/ST3GAL1/GALNT2/ADAMTS9/MUC1/ADAMTSL5/GCNT7/ADAMTS16/ST6GALNAC2/GALNT12/B3GNT2/B3GNT5/LARGE2/A4GNT/CHST4/GALNT10/GALNT3/THBS2/B3GNT9/ADAMTS4/CFP/GCNT3/ADAMTS13/B3GALNT2/GALNT6/ADAMTS7 |
| BIOCARTA_IL7_PATHWAY                                                              | 1.8<br>130<br>040<br>46 | 0.0198<br>64398 | IL7R/JAK3/LCK/PIK3CG/STAT5A/EP300/NMI/CREBBP/IL7/PTK2B/PIK3CA/BCL2                                                                                                                                                                                                                                           |
| REACTOME_SHC1_EVENTS_IN_EGFR_SIGNALING                                            | 1.8<br>127<br>136<br>65 | 0.0239<br>07265 | EREG/SHC1/AREG/HBEGF/EGF                                                                                                                                                                                                                                                                                     |
| REACTOME_NF_KB_ACTIVATION_THROUGH_FADD_RIP_1_PATHWAY_MEDIATED_BY_CASPASE_8_AND_10 | 1.8<br>119<br>837<br>53 | 0.0326<br>9429  | RNF135/CASP8/RIPK1/CASP10/DDX58/IFIH1/MAVS/TRIM25/IKBKB                                                                                                                                                                                                                                                      |
| WP_IL6_SIGNALING_PATHWAY                                                          | 1.8<br>118<br>674<br>03 | 0.0198<br>64398 | IL6/SHC1/SOCS3/PRDM1/TIMP1/JUNB/IL6R/VAV1/HCK/IRF1/STAT3/PRKCD/CRP/TYK2/JAK2/STAT1/AKT1/CREBBP/IL6ST/NR2F6/MAP3K7/SOS1/NCOA1                                                                                                                                                                                 |
| SIG_BCR_SIGNALING_PATHWAY                                                         | 1.8<br>105              | 0.0198<br>64398 | ITPR3/CR2/SHC1/PTPRC/PIK3CD/VAV1/SYK/NFATC2/MAP4K1/INPP5D/PLCG2/LYN/ITPR2/NFATC1                                                                                                                                                                                                                             |

|                                    |                         |                 |                                                                                                                                                                                                                                                                                                                                                                                                                                                                                                                                                                                                                                                                                                                                                                                                               |
|------------------------------------|-------------------------|-----------------|---------------------------------------------------------------------------------------------------------------------------------------------------------------------------------------------------------------------------------------------------------------------------------------------------------------------------------------------------------------------------------------------------------------------------------------------------------------------------------------------------------------------------------------------------------------------------------------------------------------------------------------------------------------------------------------------------------------------------------------------------------------------------------------------------------------|
|                                    | 582<br>31               |                 |                                                                                                                                                                                                                                                                                                                                                                                                                                                                                                                                                                                                                                                                                                                                                                                                               |
| WP_NUCLEAR_RECEPTORS_METAPATHWAY   | 1.8<br>050<br>082<br>42 | 0.0344<br>63277 | CCL20/TNS4/PTGS2/VDR/CYP1B1/IL11/TNFAIP3/PCK1/SRPX2/THBD/CCL2/ABCB11/BIRC3/SNAI2/MYOF/SER<br>PINA1/APOA2/ABCC3/SERPIN2/EPHA2/SLC2A3/BHLHE40/FGF19/ANGPTL4/CES1/TGFBR2/EGR1/SCNN1A/<br>ZIC2/TGFB2/SLC39A14/SLC39A8/IFNG/SLCO2B1/RGS2/JUNB/NFKB2/ALDH3A1/CYP4F12/SLC26A2/NR1I2/SL<br>C2A14/SLC2A10/SLC5A3/IL1B/ESR1/IL12B/TGFB1/HBEGF/GADD45B/ALOX5AP/PLTP/SLC2A5/CYP7A1/EPHA<br>3/SPRY1/AKAP13/B3GNT5/FKBP5/NRIP1/PRRG4/AMIGO2/S100P/NRG1/HMOX1/IRS2/GSTM5/CDC42EP3/STA<br>T3/HSPA1A/SRGN/FOXO1/ARNT/SERPIN9/JUN/SERTAD2/GGT2/CES3/SLC6A6/SP1/GGTLC2/GCLM/GCC1/I<br>GFBP1/PPARD/STOM/SLC2A1/HGF/MAFF/POU5F1/EP300/SREBF1/SLC39A13/GSTM1/SMC1A/SEC14L1/SOD<br>3/SLC6A14/GPX2/ADGRF4/SPINK13/SQSTM1/MGST1/SLC27A1/NCOA3/RXRA/PLK2/SLC5A10/FGD4/SLC6A16<br>/GSTA2/SLC5A6/SLC2A12/SLC39A1/SLC39A7/KTN1/CYP8B1/PDK4 |
| PID_EPO_PATHWAY                    | 1.8<br>020<br>557<br>71 | 0.0263<br>01824 | SHC1/SOCS3/TEC/STAT5A/SH2B3/PLCG2/VAV2/NFKB1/IRS2/LYN/PTPN6/PLCG1/JAK2/MAPK14/BTK/CBL/ST<br>AT1                                                                                                                                                                                                                                                                                                                                                                                                                                                                                                                                                                                                                                                                                                               |
| WP_OXIDATIVE_DAMAGE                | 1.8<br>019<br>224<br>2  | 0.0198<br>64398 | C1R/CR2/C5AR1/C1S/TNFRSF1B/MAPK13/C3AR1/C5/CDKN1A/C1QC/TRAF1/NFKB1/C1QA/C1QB/C2/TRAF3/<br>GADD45A/TRAF6/C4B                                                                                                                                                                                                                                                                                                                                                                                                                                                                                                                                                                                                                                                                                                   |
| WP_BLADDER_CANCER                  | 1.8<br>012<br>897<br>95 | 0.0198<br>64398 | THBS1/MMP1/CXCL8/TYMP/ERBB2/MMP9/HBEGF/EGF/VEGFA/CDKN1A                                                                                                                                                                                                                                                                                                                                                                                                                                                                                                                                                                                                                                                                                                                                                       |
| PID_FAK_PATHWAY                    | 1.7<br>967<br>684<br>71 | 0.0198<br>64398 | GRB7/MMP14/ACTN1/ITGA5/VCL/ITGB1/ITGB5/TLN1/JUN/PXN/ROCK2/GIT2/PLCG1/RRAS/ARHGEF28/ACTA1<br>/ARHGAP26/RASA1/ITGAV/CAPN2/ASAP1/BRAF/PTPN21/PIK3CA/KLF8/WASL/SOS1/ETS1/GRB2/DOCK1                                                                                                                                                                                                                                                                                                                                                                                                                                                                                                                                                                                                                               |
| WP_OSTEOCLAST_SIGNALING            | 1.7<br>955<br>264<br>4  | 0.0239<br>69653 | TNFSF11/TNFRSF11A/ITGB3/SLC9A1/CTSK/ACP5/GPR68/SPP1/IFNAR1/TNFRSF11B/IFNB1/PDGFB                                                                                                                                                                                                                                                                                                                                                                                                                                                                                                                                                                                                                                                                                                                              |
| KEGG_CYTOSOLIC_DNA_SENSING_PATHWAY | 1.7<br>894              | 0.0198<br>64398 | IL6/IL1B/CCL5/IKBKE/STING1/NFKB1/ZBP1/RIPK3/CXCL10/RIPK1/CASP1/NFKBIA/AIM2/DDX58/IFNA5/IFNA14/<br>IRF7/MAVS/ADAR/IFNB1/IKBKB                                                                                                                                                                                                                                                                                                                                                                                                                                                                                                                                                                                                                                                                                  |

|                                                                    |                         |                 |                                                                                                                      |
|--------------------------------------------------------------------|-------------------------|-----------------|----------------------------------------------------------------------------------------------------------------------|
|                                                                    | 967<br>92               |                 |                                                                                                                      |
| WP_SMALL_LIGAND_GPCRS                                              | 1.7<br>850<br>783<br>94 | 0.0494<br>51235 | PTGER2/PTGFR/PTGER4/MTNR1B/PTGIR/S1PR4/PTAFR/CNR2/CNR1/TBXA2R                                                        |
| WP_AUTOSOMAL_RECESSIVE_OSTEOPETROSIS_PATHWAYS                      | 1.7<br>839<br>811<br>56 | 0.0323<br>06543 | TNFSF11/TCIRG1/TNFRSF11A/NFKB1/TRAF6/IKBKB/CLCN7/PLEKHM1                                                             |
| WP_HIPPOYAP_SIGNALING_PATHWAY                                      | 1.7<br>830<br>014<br>89 | 0.0514<br>04272 | LATS2/NDRG1/TEAD3/MAP4K1/CXCL10/TEAD1/TEAD4/STK3/MAP4K2/LATS1/SAV1/MST1/MINK1/YY1AP1/RA<br>SSF1/NF2/TEAD2/MAP4K4     |
| WP_DEVELOPMENT_OF_PULMONARY_DENDRITIC_CELLS_AND_MACROPHAGE_SUBSETS | 1.7<br>829<br>355<br>44 | 0.0321<br>50097 | CSF2/RUNX2/IKZF1/IRF4/CSF1/STAT3/SPI1/IRF8/FLT3LG                                                                    |
| BIOCARTA_RANKL_PATHWAY                                             | 1.7<br>821<br>758<br>12 | 0.0321<br>50097 | TNFSF11/FOSL2/TNFRSF11A/FOSL1/FOS/NFKB1/IFNAR1/TRAF6/IRF9/IFNB1                                                      |
| KEGG_BLADDER_CANCER                                                | 1.7<br>820<br>054<br>75 | 0.0198<br>64398 | THBS1/MMP1/CXCL8/TYMP/ERBB2/MMP9/VEGFC/EGF/VEGFA/CDKN1A                                                              |
| PID_ANGIOPOIETIN_RECEPTOR_PATHWAY                                  | 1.7<br>809<br>887<br>45 | 0.0198<br>64398 | GRB7/FN1/SHC1/ITGA5/DOK2/FES/ITGB1/STAT5A/AGTR1/CDKN1A/NFKB1/FOXO1/NOS3/PXN/ANGPT1/ANG<br>PT2/MAPK14/RASA1/PLD2/ELF1 |
| PID_NFKAPPAB_CANONICAL_PATHWAY                                     | 1.7<br>806              | 0.0425<br>53191 | TNFAIP3/NOD2/NFKB1/MALT1/TNFRSF1A/NFKBIA/TRAF6/ATM/BCL10/IKBKB/CYLD/PRKCA/TNF/ERC1/RELA/<br>IKBKG                    |

|                                                              |                         |                 |                                                                                                                                                                                                 |
|--------------------------------------------------------------|-------------------------|-----------------|-------------------------------------------------------------------------------------------------------------------------------------------------------------------------------------------------|
|                                                              | 554<br>67               |                 |                                                                                                                                                                                                 |
| ST_P38_MAPK_PATHWAY                                          | 1.7<br>805<br>320<br>46 | 0.0268<br>62385 | IL1R1/MAPK13/DUSP1/NFKB1/MKNK2/SRF/MKNK1/GADD45A/MAP2K3/HSPB1/EEF2K/TRAF6/MAP3K5/MAPK<br>APK2/MAPK14/AKT1/TAB2/CREB5/MAP3K7/NR2C2                                                               |
| KEGG_FC_EPSILON_RI_SIGNALING_PATHWAY                         | 1.7<br>768<br>337<br>92 | 0.0198<br>64398 | CSF2/PLA2G2A/PLA2G2F/PLA2G4E/PIK3CG/MAPK13/PIK3CD/PIK3R5/LCP2/RAC2/VAV1/SYK/INPP5D/PLCG2/<br>VAV2/PRKCD/PLA2G5/LYN/FCER1G/PLA2G2D/MAP2K3/JMJD7-<br>PLA2G4B/PLCG1/MAPK14/PLA2G2C/BTK/PLA2G4B/LAT |
| REACTOME_NCAM_SIGNALING_FOR_NEURITE_O<br>UT_GROWTH           | 1.7<br>754<br>662<br>68 | 0.0198<br>64398 | COL6A5/COL6A3/COL5A1/COL6A2/COL3A1/COL6A1/COL5A2/ST8SIA4/COL4A1/COL4A2/FGFR1/SPTA1/COL5<br>A3/ARTN                                                                                              |
| KEGG_RENIN_ANGIOTENSIN_SYSTEM                                | 1.7<br>750<br>542       | 0.0239<br>69653 | MME/ANPEP/CTSG/AGTR2/CMA1/AGTR1/CTSA/ACE/LNPEP/ENPEP                                                                                                                                            |
| BIOCARTA_DEATH_PATHWAY                                       | 1.7<br>745<br>586<br>1  | 0.0253<br>15243 | BIRC3/LMNA/MAP3K14/NFKB1/CASP8/CASP7/RIPK1/TNFSF10/CFLAR/CASP10/NFKBIA/TNFRSF25/CASP6/T<br>RADD/BCL2/GAS2/CASP3/TRAF2/RELA/XIAP/FADD/APAF1                                                      |
| REACTOME_METABOLISM_OF_ANGIOTENSINOGE<br>N_TO_ANGIOTENSINS   | 1.7<br>723<br>825<br>94 | 0.0409<br>72031 | MME/ANPEP/CTSG/CTSZ/CMA1/CES1/ACE/GZMH/ENPEP/CTSD                                                                                                                                               |
| REACTOME_CHONDROITIN_SULFATE_DERMATA<br>N_SULFATE_METABOLISM | 1.7<br>663<br>856<br>2  | 0.0198<br>64398 | SDC1/HSPG2/BGN/CHSY3/DSE/GPC4/CHSY1/CHST13/CHPF2/HEXB/CHST7/GPC1/GPC5/CSGALNACT2/XYL<br>T2/AGRN/SDC2/CHST14/CHPF/GPC6/VCAN/ARSB/SDC4/CHST15/DCN/CHST3/IDUA/HEXA                                 |
| WP_ROLE_OF_OSX_AND_MIRNAS_IN_TOOTH_DE<br>VELOPMENT           | 1.7<br>647<br>510<br>55 | 0.0342<br>32186 | DKK1/RUNX2/MIRLET7G/NOTCH3/MIRLET7F1/NOTCH2/SOST/MIR34AHG/MIRLET7D/KLF4/DMP1/MIRLET7A<br>1                                                                                                      |

|                                                   |                         |                 |                                                                                                                                                                                                                                                                                                                                                                                                                                                                                                                                                                                |
|---------------------------------------------------|-------------------------|-----------------|--------------------------------------------------------------------------------------------------------------------------------------------------------------------------------------------------------------------------------------------------------------------------------------------------------------------------------------------------------------------------------------------------------------------------------------------------------------------------------------------------------------------------------------------------------------------------------|
| PID_TXA2PATHWAY                                   | 1.7<br>639<br>136<br>76 | 0.0198<br>64398 | ICAM1/SELE/LCK/PTGIR/PIK3R6/PIK3CG/TGM2/VCAM1/GNA15/PIK3R5/EGF/BLK/PLCB2/SYK/HCK/TBXA2R/PRKCD/GNA14/LYN/NOS3/ROCK1/ARR3/FGR/ARHGEF1/MAPK14/PRKCH/GRK2/PRKACA                                                                                                                                                                                                                                                                                                                                                                                                                   |
| REACTOME_CLASS_A_1_RHODOPSIN_LIKE_RECEPTORS_      | 1.7<br>598<br>487<br>19 | 0.0330<br>41667 | CCL13/CCL11/CCL20/CXCL13/XCR1/CXCL5/CCR8/CCL7/HCAR3/BDKRB1/FPR2/HCAR2/CCR2/CCR4/CXCR3/PPBP/CXCR1/CXCL8/CXCL3/PTGER2/MC3R/PTGFR/UTS2/CCL23/CXCL1/PTGER4/PROK2/BDKRB2/P2RY10/MTNR1B/CCL2/CXCL2/CCL22/CMKLR1/INSL3/FPR3/GPR39/AGTR2/F2RL1/C5AR1/PROKR1/CXCR5/NPY2R/CCR7/CCR5/HRH2/CCR6/CXCL6/PTGIR/NTS/CXCL9/CCR1/GPR132/LTB4R2/P2RY6/HTR1D/LTB4R/FFAR2/C3/FAR3/GPR18/SAA1/P2RY4/F2RL3/CCR3/CXCR2/GPR31/CXCR6/S1PR4/CXCL12/C5AR2/CCL5/HCRTR1/TAC3/F2RL2/FPR1/HRH1/C3AR1/GPR183/PTAFR/GPBAR1/GRPR/C5/P2RY1/QRFP/CNR2/PYY/XCL2/HTR7/KISS1R/ECE1/SUCNR1/CNR1/AGTR1/OXER1/TBXA2R/OXTR |
| KEGG_PHENYLALANINE_METABOLISM                     | 1.7<br>583<br>158<br>64 | 0.0493<br>48246 | ALDH1A3/TAT/ALDH3B2/HPD/ALDH3A1/ALDH3B1/IL4I1/AOC3/MAOB                                                                                                                                                                                                                                                                                                                                                                                                                                                                                                                        |
| WP_OSTEOPONTIN_SIGNALING                          | 1.7<br>577<br>513<br>45 | 0.0321<br>50097 | ITGB3/MMP9/PLAU/MAP3K14/NFKB1/SPP1/ITGAV/IKBKB                                                                                                                                                                                                                                                                                                                                                                                                                                                                                                                                 |
| PID_IL3_PATHWAY                                   | 1.7<br>554<br>553<br>05 | 0.0425<br>06812 | CSF2RB/CISH/SHC1/CEBPB/PIM1/OSM/STAT5A                                                                                                                                                                                                                                                                                                                                                                                                                                                                                                                                         |
| WP_EICOSANOID_METABOLISM_VIA_CYCLO_OXYGENASES_COX | 1.7<br>540<br>419<br>89 | 0.0601<br>02318 | PTGS2/PTGFR/PTGES/PTGIS/PTGIR/CYP4F2/PTGS1/CYP4F12/TBXA2R/PLA2G5/ACOX2/PPARD/TBXAS1                                                                                                                                                                                                                                                                                                                                                                                                                                                                                            |
| REACTOME_INTERLEUKIN_1_FAMILY_SIGNALING           | 1.7<br>519<br>905<br>27 | 0.0198<br>64398 | IL36B/IL1R1/IL36RN/CTSG/IL18R1/IL1RN/IL1R2/NOD2/IL36G/ALOX5/PTPN14/SAA1/MAP3K8/PTPN7/IL1RL1/IL1RL2/NFKB2/IL18RAP/IL37/IL1B/IL1RAP/IRAK3/PTPN12/IL1A/IRAK2/NFKB1/STAT3/MYD88/PTPN9/CASP1/PTPN6/NFKBIA/S100A12/IL18BP/MAP3K3/SMAD3/PTPN18                                                                                                                                                                                                                                                                                                                                        |
| WP_LEPTIN_INSULIN_OVERLAP                         | 1.7<br>498              | 0.0493<br>99482 | LEP/SOCS3/PIK3CG/SOCS1/IRS1/IRS2/STAT3/JAK2/INSR/SOCS2/AKT1                                                                                                                                                                                                                                                                                                                                                                                                                                                                                                                    |

|                                            |                         |                 |                                                                                                                                                                                                                              |
|--------------------------------------------|-------------------------|-----------------|------------------------------------------------------------------------------------------------------------------------------------------------------------------------------------------------------------------------------|
|                                            | 032<br>06               |                 |                                                                                                                                                                                                                              |
| KEGG_ADHERENS_JUNCTION                     | 1.7<br>495<br>142<br>34 | 0.0198<br>64398 | MET/SNAI2/ACTN1/TGFBR2/IQGAP1/ERBB2/FGFR1/VCL/RAC2/LEF1/NECTIN2/WAS/PTPRF/ACTN4/PTPN6/WASF2/PTPRJ/SMAD3/EP300/NECTIN4/CTNND1/INSR/IGF1R/TCF7/SNAI1/CTNNA1/PTPN1/NECTIN3/CREBBP/PARD3/WASL/TGFBR1/MAP3K7/ACTB/TJP1/SSX2IP/FER |
| BIOCARTA_LLECTIN_PATHWAY                   | 1.7<br>482<br>407<br>66 | 0.0408<br>54352 | C3/C5/C7/C2/C8A/C4A/C4B/C6                                                                                                                                                                                                   |
| WP_MIRNAS_INVOLVED_IN_DNA_DAMAGE_RESPONSE  | 1.7<br>452<br>738<br>42 | 0.0198<br>64398 | MIR23A/MIR222/MIR27A/MIR210/MIRLET7F1/MIR221/MIR34C/CDKN1A/MIR34B/MIR503/MIRLET7D/MIR23B/CDK6/MIR93/MIR106B/MIR27B/MIRLET7A1/TP53/MIR421/ATM/ABL1/CCNE1                                                                      |
| WP_SARS_CORONAVIRUS_AND_INNATE_IMMUNITY    | 1.7<br>418<br>116<br>2  | 0.0613<br>40044 | TICAM1/IKBKE/STAT2/TRAF3/DDX58/IFNA5/IFNA14/IFIH1/TYK2/IFNAR1/MAVS/TLR3/IRF9/STAT1/IFNB1/IFNA17                                                                                                                              |
| REACTOME_GROWTH_HORMONE_RECEPTOR_SIGNALING | 1.7<br>416<br>713<br>49 | 0.0514<br>04272 | PRLR/CISH/SOCS3/STAT5A/SOCS1/IRS1/IRS2/STAT3/LYN/PTPN6/JAK2/ADAM17/GHR/STAT1/PTPN1/SOCS2                                                                                                                                     |
| BIOCARTA_IL5_PATHWAY                       | 1.7<br>412<br>140<br>36 | 0.0403<br>60856 | CCL11/IL6/CCR3/IL1B/CD4                                                                                                                                                                                                      |
| PID_TRAIL_PATHWAY                          | 1.7<br>405<br>858<br>47 | 0.0437<br>69702 | TNFRSF10C/TNFRSF10A/TNFRSF10D/PIK3CD/TNFRSF10B/CASP8/RIPK1/TNFSF10/CFLAR/CASP10                                                                                                                                              |
| BIOCARTA_TOLL_PATHWAY                      | 1.7<br>404              | 0.0587<br>3494  | PGLYRP1/FOS/TLR7/MAP3K14/NFKB1/MYD88/JUN/NFKBIA/MAP2K3/TRAF6/TLR3/MAPK14                                                                                                                                                     |

|                                                               |                         |                 |                                                                                                                                                                                          |
|---------------------------------------------------------------|-------------------------|-----------------|------------------------------------------------------------------------------------------------------------------------------------------------------------------------------------------|
|                                                               | 933<br>46               |                 |                                                                                                                                                                                          |
| WP_EXTRACELLULAR_VESICLEMEDIATED_SIGNALING_IN_RECIPIENT_CELLS | 1.7<br>397<br>005<br>11 | 0.0673<br>99223 | MET/WNT3A/TGFBR2/ERBB2/TGFB2/PIK3R5/TGFB1/TGFB3/SMAD3/HGF                                                                                                                                |
| REACTOME_OTHER_SEMAPHORIN_INTERACTIONS                        | 1.7<br>369<br>218<br>32 | 0.0709<br>40808 | PTPRC/PLXND1/CD72/ITGB1/PLXNA1/ITGA1/PLXNC1/PLXNA4/SEMA6D/PLXNA2/SEMA7A                                                                                                                  |
| PID_MYC_REPRESS_PATHWAY                                       | 1.7<br>364<br>680<br>17 | 0.0198<br>64398 | COL1A2/DKK1/ITGB4/CDKN2B/SLC11A1/ERBB2/NDRG1/GFI1/CEBPD/CCL5/DNTT/ITGB1/PDGFRB/ZFP36L1/CDKN1A/SPI1/CFLAR/SP1/GADD45A/SMAD3/FOXO3/EP300/IRF8/DNMT3A/BRCA1                                 |
| REACTOME_PRE_NOTCH_PROCESSING_IN_GOLGI                        | 1.7<br>336<br>205<br>28 | 0.0569<br>34034 | B4GALT1/ATP2A3/NOTCH3/FURIN/NOTCH2                                                                                                                                                       |
| REACTOME_PECAM1_INTERACTIONS                                  | 1.7<br>333<br>167<br>51 | 0.0566<br>90099 | LCK/ITGB3/INPP5D/LYN/PECAM1/PTPN6/PLCG1/ITGAV                                                                                                                                            |
| REACTOME_GRB2_EVENTS_IN_ERBB2_SIGNALING                       | 1.7<br>330<br>014<br>12 | 0.0328<br>93039 | EREG/ERBB2/HBEGF/EGF/NRG1/BTC                                                                                                                                                            |
| KEGG_RIG_I_LIKE_RECEPTOR_SIGNALING_PATHWAY                    | 1.7<br>325<br>117<br>12 | 0.0198<br>64398 | CXCL8/MAPK13/IL12B/IKBKE/STING1/IFNE/NFKB1/CXCL10/CASP8/RIPK1/CASP10/NFKBIA/TRAF3/NLRX1/DDX58/IFNA5/IFNA14/IFIH1/IRF7/MAVS/TRAF6/TRIM25/DHX58/MAPK14/DDX3X/IFNB1/IKBKB/CYLD/IFNA17/TRADD |
| PID_VEGF_VEGFR_PATHWAY                                        | 1.7<br>317              | 0.0478<br>75873 | NRP1/NRP2/VEGFC/FLT4/VEGFA/FLT1/KDR                                                                                                                                                      |



|                                                                        |                         |                 |                                                                                                                                                                                                                                                                  |
|------------------------------------------------------------------------|-------------------------|-----------------|------------------------------------------------------------------------------------------------------------------------------------------------------------------------------------------------------------------------------------------------------------------|
|                                                                        | 332<br>37               |                 |                                                                                                                                                                                                                                                                  |
| WP_MICRORNAS_IN_CARDIOMYOCYTE_HYPERTROPHY                              | 1.7<br>283<br>889<br>48 | 0.0198<br>64398 | LIF/MIR23A/FZD1/CISH/WNT3A/PLA2G2A/RCAN1/MIR199A1/PIK3CG/NFATC4/PIK3CD/PRKG1/TGFB1/EGF/PLCB2/IKBKE/HDAC7/MAP3K14/NRG1/NFKB1/STAT3/MAPK4/FZD2/ROCK1/MAP2K3/ROCK2/MIR27B/MIR199A2/MAPK14/IGF1R/CAMK2D/CTF1/LRP5/MIR140/IKBKB/AKT1/IL6ST/IGF1/PIK3CA/MIR103A2/MAPK7 |
| REACTOME_GAB1_SIGNALOSOME                                              | 1.7<br>270<br>442<br>85 | 0.0640<br>13562 | EREG/AREG/HBEGF/EGF/PXN/BTC                                                                                                                                                                                                                                      |
| PID_IL1_PATHWAY                                                        | 1.7<br>269<br>593<br>48 | 0.0470<br>80942 | IL1R1/IL1RN/IL1R2/TICAM2/IL1B/IL1RAP/IRAK3/IL1A/NFKB1/MYD88/JUN/CASP1/MAP3K3/TRAF6/IRAK1/SQSTM1                                                                                                                                                                  |
| WP_TYPE_III_INTERFERON_SIGNALING                                       | 1.7<br>264<br>283<br>13 | 0.0478<br>75873 | STAT2/IFNLR1/TYK2/IL10RB/IRF9/STAT1/IFNL3                                                                                                                                                                                                                        |
| REACTOME_SIGNALING_BY_VEGF                                             | 1.7<br>248<br>817<br>03 | 0.0198<br>64398 | ITPR3/NRP1/SH2D2A/ITGB3/CYBB/NRP2/MAPK13/NCF2/VEGFC/NCKAP1L/VAV1/CAV1/JUP/FLT4/VEGFA/VAV2/NCF1/AXL/PRKCD/FLT1/ITPR2/NOS3/PXN/CDH5/WASF2/ROCK1/PRR5/NCF4/ROCK2/HSPB1/KDR/PLCG1/CTNND1/CYFIP1/SPHK1/MAPKAPK2/MAPK14                                                |
| REACTOME_CASPASE_ACTIVATION_VIA_EXTRINSIC_APOPTOTIC_SIGNALLING_PATHWAY | 1.7<br>242<br>612<br>88 | 0.0510<br>20408 | FASLG/TNFRSF10A/TICAM2/CD14/TNFRSF10B/TICAM1/CASP8/RIPK1/TNFSF10/CFLAR/UNC5B/LY96/FAS/TLR4                                                                                                                                                                       |
| WP_TNF_ALPHA_SIGNALING_PATHWAY                                         | 1.7<br>241<br>602<br>77 | 0.0198<br>64398 | IL6/TNFAIP3/SELE/CCL2/BIRC3/TNFRSF1B/MAP3K8/PYGL/NFKB2/REL/MAP3K14/TRAF1/NFKB1/RIPK3/CASP8/CASP7/RIPK1/JUN/CFLAR/TNFRSF1A/NFKBIA/MAP3K3/MAP2K3/RFFL/MAP3K5/OTUD7B/TAB3/IKBKB/NSMAF/GLUL/MAP4K2/AKT1/CREBBP/CYBA/CUL1/TRADD                                       |
| BIOCARTA_PML_PATHWAY                                                   | 1.7<br>241              | 0.0640<br>13562 | FASLG/TNFRSF1B/PML/TNFRSF1A/SP100/PRAM1/FAS/TP53/CREBBP                                                                                                                                                                                                          |

|                                                                   |                         |                 |                                                                                                              |
|-------------------------------------------------------------------|-------------------------|-----------------|--------------------------------------------------------------------------------------------------------------|
|                                                                   | 189<br>21               |                 |                                                                                                              |
| REACTOME_PLASMA_LIPOPROTEIN_CLEARANCE                             | 1.7<br>210<br>754<br>4  | 0.0550<br>5033  | APOB/LDLR/SOAT2/APOBR/CES3/SOAT1/NPC2/CUBN/HDLBP/APOC4/NPC1/NR1H3/AP2A2/VLDLR/LDLRAP1/AP2A1/APOA1/NCEH1/CLTC |
| REACTOME_TRAFFICKING_AND_PROCESSING_OF_ENDOSOMAL_TLR              | 1.7<br>205<br>357<br>44 | 0.0478<br>75873 | TLR8/CTSB/TLR9/TLR7/CTSS/UNC93B1/CTSK/CTSL/LGMN/TLR3/HSP90B1                                                 |
| WP_NCRNAS_INVOLVED_IN_STAT3_SIGNALING_IN_HEPATOCELLULAR_CARCINOMA | 1.7<br>205<br>319<br>05 | 0.0409<br>72031 | IL6/IL11/JAK3/IL6R/MIR200A/NFKB1/STAT3/MIR200B                                                               |
| PID_P38_ALPHA_BETA_DOWNSTREAM_PATHWAY                             | 1.7<br>185<br>181<br>71 | 0.0268<br>29213 | PTGS2/NOS2/CEBPB/KRT8/ESR1/SLC9A1/ELK4/JUN/MKNK1/HSPB1/MEF2A/MAPKAPK2/MAPK14/TP53/RPS6KA4                    |
| PID_WNT_SIGNALING_PATHWAY                                         | 1.7<br>174<br>705<br>4  | 0.0598<br>5508  | ROR2/DKK1/FZD1/WNT3A/FZD7/FZD8/FZD5/IGFBP4/CTHRC1/FZD10/KREMEN2/FZD2/FZD4/FZD6                               |
| REACTOME_INTERLEUKIN_37_SIGNALING                                 | 1.7<br>151<br>360<br>35 | 0.0659<br>54722 | IL18R1/PTPN14/PTPN7/IL37/PTPN12/STAT3/PTPN9/CASP1/PTPN6/IL18BP/SMAD3/PTPN18/PTPN2                            |
| WP_WHITE_FAT_CELL_DIFFERENTIATION                                 | 1.7<br>149<br>041<br>75 | 0.0613<br>9038  | KLF5/GATA3/EGR2/CEBPB/CEBPD/IRF4/STAT5A/EBF1/FOXO1/KLF4/RORA/NR2F2/SREBF1/MECOM/CTNNA1/PPARG                 |
| BIOCARTA_CTCF_PATHWAY                                             | 1.7<br>143              | 0.0512<br>81056 | TGFBR2/PIK3CG/TGFB2/TGFB1/TGFB3/SMAD1/CDKN2A/TP53/PTEN/CD79A/PIK3CA/TGFB1/MTOR/TGFBR3                        |

|                                                           |                         |                 |                                                                                                                                                                                                      |
|-----------------------------------------------------------|-------------------------|-----------------|------------------------------------------------------------------------------------------------------------------------------------------------------------------------------------------------------|
|                                                           | 500<br>69               |                 |                                                                                                                                                                                                      |
| REACTOME_DECTIN_2_FAMILY                                  | 1.7<br>141<br>192<br>2  | 0.0587<br>3494  | CLEC4D/CLEC10A/MUCL1/CLEC6A/MUC3A/MUC1/SYK/PLCG2/LYN/FCER1G                                                                                                                                          |
| REACTOME_NOD1_2_SIGNALING_PATHWAY                         | 1.7<br>139<br>971<br>93 | 0.0474<br>36268 | TNFAIP3/BIRC3/NOD2/MAPK13/CASP4/IRAK2/CASP8/CARD9/CASP1/CASP2/TRAF6/MAPK14/IRAK1/TAB3/IKBKB/CYLD/TAB2/MAP3K7/UBC                                                                                     |
| PID_HIF2PATHWAY                                           | 1.7<br>136<br>066<br>07 | 0.0640<br>13562 | SERPINE1/MMP14/BHLHE40/TWIST1/VEGFA/EPAS1/CITED2/ARNT/FLT1/SP1/SLC2A1/POU5F1/EP300/KDR                                                                                                               |
| REACTOME_TP53_REGULATES_TRANSCRIPTION_OF_CELL_DEATH_GENES | 1.7<br>124<br>476<br>69 | 0.0268<br>29213 | TNFRSF10C/STEAP3/TNFRSF10A/IGFBP3/TNFRSF10D/NDRG1/NLRC4/TNFRSF10B/PERP/CASP1/AIFM2/CASP10/CASP2/PIDD1/BCL6/PMAIP1/FAS/TP63/TP53/ATM/CASP6/CREBBP/CHM/BCL2L14                                         |
| REACTOME_SIGNALING_BY_ERYTHROPOIETIN                      | 1.7<br>075<br>532<br>78 | 0.0587<br>3494  | SHC1/PIK3CG/PIK3CD/PIK3R5/VAV1/STAT5A/PLCG2/IRS2/LYN/PLCG1/JAK2                                                                                                                                      |
| WP_KIT_RECEPTOR_SIGNALING_PATHWAY                         | 1.7<br>059<br>833<br>92 | 0.0198<br>64398 | GRB7/SNAI2/SHC1/TEC/GRB10/JUNB/FOS/VAV1/STAT5A/SOCS1/INPP5D/RPS6KA3/STAT3/LYN/PTPN6/FOXO3/EP300/PLCG1/KITLG/JAK2/MAPK14/TBX2/BTK/CBL/SNAI1/STAT1/AKT1/RPS6KA1/BCL2/SOS1/DOK1/PRKCA/GRB2/STAT5B/SOCS6 |
| KEGG_ACUTE_MYELOID_LEUKEMIA                               | 1.7<br>048<br>003<br>52 | 0.0198<br>64398 | RUNX1/PIK3CG/PIM1/PIK3CD/FLT3/PIK3R5/PML/LEF1/STAT5A/JUP/NFKB1/STAT3/SPI1/PPARD/TCF7/ARAF1/IKBKB/AKT1/BRAF/RUNX1T1/PIK3CA/SOS1/MTOR/PIK3CB/GRB2/STAT5B/RPS6KB1/RELA/ZBTB16/AKT2                      |
| REACTOME_REGULATION_OF_IFNG_SIGNALING                     | 1.7<br>032              | 0.0556<br>80599 | SOCS3/IFNG/SOCS1/PTPN6/PTPN2/JAK2/STAT1/PTPN1/PIAS1/IFNGR2                                                                                                                                           |

|                                                  |                         |                 |                                                                                                                                                                                                             |
|--------------------------------------------------|-------------------------|-----------------|-------------------------------------------------------------------------------------------------------------------------------------------------------------------------------------------------------------|
|                                                  | 132<br>76               |                 |                                                                                                                                                                                                             |
| WP_IL9_SIGNALING_PATHWAY                         | 1.7<br>030<br>367<br>25 | 0.0640<br>13562 | IL9R/JAK3/IL2RG/STAT5A/STAT3                                                                                                                                                                                |
| REACTOME_CARGO_CONCENTRATION_IN_THE_ER           | 1.7<br>027<br>051<br>88 | 0.0550<br>5033  | CTSZ/SERPINA1/AREG/COL7A1/CTSC/SEC24D/CNIH3/LMAN1                                                                                                                                                           |
| REACTOME_REGULATION_OF_IFNA_SIGNALING            | 1.7<br>020<br>234<br>32 | 0.0587<br>3494  | SOCS3/SOCS1/STAT2/PTPN6/IFNA5/IFNA14/TYK2/IFNAR1/STAT1/USP18/IFNB1/PTPN1/IFNA17                                                                                                                             |
| BIOCARTA_TPO_PATHWAY                             | 1.7<br>009<br>019<br>84 | 0.0512<br>81056 | SHC1/PIK3CG/FOS/STAT5A/STAT3/JUN/PLCG1/JAK2/THPO/RASA1/STAT1/PIK3CA/SOS1/PRKCA/GRB2/STAT5B                                                                                                                  |
| BIOCARTA_CARDIACEGF_PATHWAY                      | 1.7<br>008<br>976<br>09 | 0.0569<br>34034 | ADAM12/AGTR2/FOS/EGF/NFKB1/JUN/EDNRA/PLCG1                                                                                                                                                                  |
| BIOCARTA_INTEGRIN_PATHWAY                        | 1.7<br>008<br>020<br>64 | 0.0640<br>13562 | SHC1/ACTN1/VCL/ITGB1/CAV1/ZYX/TLN1/JUN/TNS1/ROCK1                                                                                                                                                           |
| PID_BETA_CATENIN_NUC_PATHWAY                     | 1.6<br>991<br>221<br>44 | 0.0198<br>64398 | DKK1/CXCL8/CCN1/SNAI2/IGF2BP1/CDX1/TBXT/SALL4/ADCY7/MMP9/MDFIC/LEF1/TRRAP/TLE1/SFN/KRT1/JUN/KLF4/TBL1X/EP300/TERT/VCAN/CDKN2A/MED12/TCF7/TLE4/AR/CACNA1G/CHD8/BCL9/MMP2/CUL1                                |
| WP_NONGENOMIC_ACTIONS_OF_125_DIHYDROXYVITAMIN_D3 | 1.6<br>974              | 0.0198<br>64398 | VDR/IL6/CXCL8/CCL2/NOD2/TLR8/MAPK13/IFNG/TLR2/RELB/NFKB2/CAMP/CAV1/PLCB2/CD40LG/PLCG2/NFKB1/STAT2/CD40/PRKCD/JUN/OAS2/TNFRSF1A/SP1/PLCE1/TYK2/CYP24A1/PLCB3/TLR4/MAPK14/RSAD2/RXRA/CAMK2D/PRKCH/STAT1/IKBKB |

|                                                                                 |                         |                 |                                                                                                                                                                                                   |
|---------------------------------------------------------------------------------|-------------------------|-----------------|---------------------------------------------------------------------------------------------------------------------------------------------------------------------------------------------------|
|                                                                                 | 979<br>18               |                 |                                                                                                                                                                                                   |
| REACTOME_TP53_REGULATES_TRANSCRIPTION_OF_DEATH_RECEPTORS_AND_LIGANDS            | 1.6<br>959<br>586<br>93 | 0.0637<br>97265 | TNFRSF10C/TNFRSF10A/IGFBP3/TNFRSF10D/TNFRSF10B/FAS/TP63/TP53                                                                                                                                      |
| REACTOME_PLATELET_AGGREGATION_PLUGIN_FORMATION_                                 | 1.6<br>912<br>298<br>91 | 0.0367<br>9435  | COL1A1/COL1A2/FN1/SHC1/ITGB3/SYK/TLN1/FGG/GP1BA/VWF/ADRA2A/RASGRP1/APBB1IP/THPO/ITGA2B                                                                                                            |
| WP_METASTATIC_BRAIN_TUMOR                                                       | 1.6<br>908<br>573<br>89 | 0.0840<br>30052 | MIRLET7G/MIRLET7F1/MIR34C/MIR148A/MIR34B/MIRLET7D/CDK6/MIRLET7A1/TP53                                                                                                                             |
| BIOCARTA_FAS_PATHWAY                                                            | 1.6<br>882<br>029<br>35 | 0.0746<br>67504 | FASLG/LMNA/CASP8/CASP7/JUN/CFLAR/CASP10/FAS/PRKDC/ARHGDIB/CASP6/MAP3K7/CASP3/PTPN13/PAK2/LMNB2/FADD                                                                                               |
| REACTOME_ANTIMICROBIAL_PEPTIDES                                                 | 1.6<br>879<br>824<br>54 | 0.0198<br>64398 | PI3/CCR2/BPIFB4/EPPIN/LCN2/CTSG/PLA2G2A/LTF/CCR6/SLC11A1/PGLYRP1/RNASE7/LYZ/DEFA4/TLR2/S100A8/S100A9/TLR1/CAMP/CD4/ELANE/DEFB110/ITLN1/RNASE3/DEFA3/BPIFB2                                        |
| REACTOME_ESTROGEN_DEPENDENT_NUCLEAR_EVENTS_DOWNSTREAM_OF_ESR_MEMBRANE_SIGNALING | 1.6<br>876<br>043<br>73 | 0.0591<br>31299 | EREG/AREG/FOS/HBEGF/EGF/SRF/BTC/FOXO3/UHMK1/AKT1/EPGN/BCL2                                                                                                                                        |
| PID_AR_PATHWAY                                                                  | 1.6<br>836<br>720<br>37 | 0.0198<br>64398 | SVIL/LATS2/FHL2/NRIP1/NKX3-1/RPS6KA3/CASP8/SRF/HIP1/CDK6/TGFB111/CTDSP1/TMPRSS2/PIAS3/CDKN2A/BRCA1/PRKDC/AR/TMF1/AKT1/ZNF318/CARM1/PTK2B/GSN/RANBP9/UBE3A/VAV3/KDM4C/PIAS1/KDM3A/PAWR/TGIF1/NCOA6 |
| REACTOME_RIP_MEDIATED_NFKB_ACTIVATION_VIA_ZBP1                                  | 1.6<br>817              | 0.0640<br>13562 | NFKB2/TICAM1/NFKB1/ZBP1/RIPK3/MYD88/RIPK1/NFKBIA/TLR3/IKBKB                                                                                                                                       |

|                                                             |                         |                 |                                                                                                                                                                                                            |
|-------------------------------------------------------------|-------------------------|-----------------|------------------------------------------------------------------------------------------------------------------------------------------------------------------------------------------------------------|
|                                                             | 800<br>01               |                 |                                                                                                                                                                                                            |
| REACTOME_MYD88_INDEPENDENT_TLR4_CASCA<br>DE_                | 1.6<br>810<br>514<br>17 | 0.0198<br>64398 | BIRC3/NOD2/TICAM2/SAA1/MAP3K8/NFKB2/CD14/FOS/DUSP4/TICAM1/IKBKE/IRAK2/NFKB1/RIPK3/RPS6KA<br>3/CASP8/RIPK1/JUN/NFKBIA/S100A12/TRAF3/LY96/DUSP6/MAP2K3/IRF7/TRAF6/MEF2A/DUSP3/TLR4/MAPK<br>APK2/MAPK14/IRAK1 |
| PID_HIV_NEF_PATHWAY                                         | 1.6<br>809<br>875<br>94 | 0.0647<br>1415  | FASLG/BIRC3/MAP3K14/TRAF1/NFKB1/CASP8/CASP7/RIPK1/CD247/CFLAR/TNFRSF1A/CASP2/NFKBIA/MAP<br>3K5/FAS                                                                                                         |
| ST_GA13_PATHWAY                                             | 1.6<br>804<br>229<br>09 | 0.0471<br>49758 | PI3/CFB/NFKB2/TBXA2R/NFKB1/SRF/NFKBIA/ROCK1/ROCK2/MAP3K5/PHKA2/PLD2/AKT1/BCL2/TONSL/GNA<br>13/PIK3CB/PLD3/AKT2/PDPK1/IKBKG/PRKD1                                                                           |
| WP_IL17_SIGNALING_PATHWAY                                   | 1.6<br>800<br>412<br>14 | 0.0897<br>61391 | CEBPB/CEBPD/IL17RA/MAP3K14/NFKB1/STAT3/SP1/IL25/TRAF3/JAK2/TRAF6/TRAF3IP2/IL17RC/IKBKB/AKT1<br>/PIK3CA/MAP3K7                                                                                              |
| KEGG_GLYCOSAMINOGLYCAN_BIOSYNTHESIS_C<br>HONDROITIN_SULFATE | 1.6<br>786<br>230<br>52 | 0.0659<br>54722 | CHSY3/DSE/CHSY1/CHST13/CHPF2/CHST7/CSGALNACT2/XYL2/CHST14/CHPF/CHST15/CHST3                                                                                                                                |
| PID_TELOMERASE_PATHWAY                                      | 1.6<br>781<br>174<br>15 | 0.0198<br>64398 | IFNG/FOS/ESR1/TGFB1/EGF/WT1/IRF1/NFKB1/JUN/ZNF1/SMG6/SP1/SMAD3/NR2F2/MXD1/HUS1/SIN3A/TE<br>RT/SIN3B/ATM/ABL1/PINX1/AKT1/SP3/RAD50/IL2/WRN/UBE3A/SMG5/MTOR/RAD9A/TNKS/MAX/HDAC1/NCL/<br>RPS6KB1/BLM/POT1    |
| WP_IL1_SIGNALING_PATHWAY                                    | 1.6<br>767<br>377<br>81 | 0.0279<br>9647  | IL1R1/CCL2/REL/IL1B/IL1RAP/IRAK3/IL1A/IRAK2/MAP3K14/NFKB1/MYD88/JUN/NFKBIA/MAP3K3/MAP2K3/PL<br>CG1/TRAF6/MAPKAPK2/MAPK14/IRAK1/SQSTM1/TAB3/MAP3K2/IKBKB                                                    |
| PID_ATF2_PATHWAY                                            | 1.6<br>753              | 0.0198<br>64398 | IL6/CXCL8/NOS2/SELE/SOCS3/COL24A1/TGFB2/IFNG/JUNB/ARG1/PLAU/FOS/ESR1/DUSP1/DUSP5/JUN/SER<br>PINB5/GADD45A/EP300/ATF3/IL23A/MAPK14/BRCA1                                                                    |

|                                                               |                         |                 |                                                                                                                                                                                                                                                                                                                                                                                                                             |
|---------------------------------------------------------------|-------------------------|-----------------|-----------------------------------------------------------------------------------------------------------------------------------------------------------------------------------------------------------------------------------------------------------------------------------------------------------------------------------------------------------------------------------------------------------------------------|
|                                                               | 777<br>49               |                 |                                                                                                                                                                                                                                                                                                                                                                                                                             |
| WP_PDGF_PATHWAY                                               | 1.6<br>746<br>678<br>08 | 0.0551<br>24569 | SHC1/FOS/VAV1/PDGFRB/VAV2/NFKB1/STAT3/SRF/JUN/NFKBIA/PLCG1/PDGFA/RASA1/STAT1/PDGFB/WAS<br>L/SOS1/TIAM1/GRB2                                                                                                                                                                                                                                                                                                                 |
| NABA_ECM_AFFILIATED                                           | 1.6<br>736<br>809<br>8  | 0.0224<br>08304 | REG1A/LGALS7/CD209/REG1B/FCN1/CLEC4D/CLEC10A/FCN2/MUC22/SDC1/MUCL1/CLEC6A/COLEC12/LGALS14/MUC3A/MUC2/LGALS12/C1QTNF6/C1QTNF1/ANXA8/GPC4/SEMA3A/PLXND1/ITLN2/CLEC5A/MUC1/PLXNB2/C1QL4/FREM1/CLEC2B/PLXDC2/PLXNA1/LGALS9C/CLEC7A/ANXA2/PLXDC1/SEMA3F/ITLN1/LMAN1/C1QC/PLXNA3/C1QA/GRIFIN/C1QB/GPC1/LGALS3/C1QTNF7/C1QTNF9/CLEC4M/GPC5/PLXNC1/SFTPB/LGALS8/SDC2/ANXA1/LGALS2/PLXNA4/ANXA4/SFTPA1/MUC13/GPC6/SEMA6D/SEMA3C/SDC4 |
| BIOCARTA_UCALPAIN_PATHWAY                                     | 1.6<br>736<br>559<br>88 | 0.0623<br>79275 | ACTN1/ITGB3/ITGB1/TLN1                                                                                                                                                                                                                                                                                                                                                                                                      |
| PID_IL2_PI3K_PATHWAY                                          | 1.6<br>717<br>402<br>27 | 0.0720<br>49114 | IL2RA/IL2RB/SHC1/JAK3/LCK/IL2RG/UGCG/NFKB1/FOXO3/TERT/EIF3A/AKT1/IL2/PIK3CA/BCL2/SMPD1/SOS1/MTOR/GRB2                                                                                                                                                                                                                                                                                                                       |
| WP_EICOSANOID_SYNTHESIS                                       | 1.6<br>696<br>084<br>32 | 0.0587<br>3494  | PTGS2/PTGES/PLA2G2A/PTGIS/PTGS1/ALOX5/ALOX5AP/ALOX15B/PLA2G5/GGT2/GGTLC2/TBXAS1                                                                                                                                                                                                                                                                                                                                             |
| WP_PHOTODYNAMIC_THERAPYINDUCED_NFE2L2_NRF2_SURVIVAL_SIGNALING | 1.6<br>678<br>932<br>3  | 0.0737<br>34576 | ABCC3/CES1/MAPK13/FOS/HMOX1/JUN/GCLM/MAPK14/ABCC6/SRXN1/NFE2L2                                                                                                                                                                                                                                                                                                                                                              |
| WP_HYPERTROPHY_MODEL                                          | 1.6<br>674<br>233<br>61 | 0.0956<br>44376 | CCN1/IL1R1/IFNG/HBEGF/VEGFA/IL1A/NR4A3/ADAM10/ATF3                                                                                                                                                                                                                                                                                                                                                                          |
| REACTOME_SEMAPHORIN_INTERACTIONS                              | 1.6<br>673              | 0.0198<br>64398 | MET/NRP1/MYH9/PTPRC/ERBB2/SEMA3A/PLXND1/FES/CD72/ITGB1/PLXNA1/TLN1/MYL9/LIMK1/ITGA1/PLXNA3/MYH11/ROCK1/PLXNC1/ROCK2/PLXNA4/RRAS/SEMA6D/LIMK2                                                                                                                                                                                                                                                                                |

|                                                                     |                         |                 |                                                                                                                                                                                            |
|---------------------------------------------------------------------|-------------------------|-----------------|--------------------------------------------------------------------------------------------------------------------------------------------------------------------------------------------|
|                                                                     | 641<br>85               |                 |                                                                                                                                                                                            |
| BIOCARTA_PPARA_PATHWAY                                              | 1.6<br>673<br>536<br>79 | 0.0370<br>73784 | PTGS2/NOS2/APOA2/PIK3CG/DUSP1/STAT5A/NRIP1/HSPA1A/CITED2/JUN/SP1/NFKBIA/LPL/EP300/PDGFA/RXRA/NCOR2/CREBBP/PIK3CA/NCOR1/NR1H3/PPARA/NCOA1/PRKCA/APOA1/STAT5B/TNF/PPARGC1A/RELA/PRKAR2A/MED1 |
| WP_DEREGULATION_OF_RAB_AND_RAB_EFFECTOR_GENES_IN_BLADDER_CANCER     | 1.6<br>672<br>080<br>78 | 0.0706<br>69489 | MLPH/RAB27A/SYTL1/SYTL5/UNC13D/SYTL4/SYTL3                                                                                                                                                 |
| REACTOME_TRANSCRIPTIONAL_ACTIVITY_OF_SMAD2_SMAD3_SMAD4_HETEROTRIMER | 1.6<br>667<br>457<br>98 | 0.0367<br>9435  | SERPINE1/CDKN2B/ATP1B4/WWTR1/JUNB/SKI/SP1/SMAD3/USP9X/NCOR2/CCNK/CCNT1/TFDP1/NCOR1/RNF111/UBC/SMURF2/TGIF1/RBL1/HDAC1/TGIF2/MEN1                                                           |
| REACTOME_SHC1_EVENTS_IN_ERBB4_SIGNALING                             | 1.6<br>654<br>977<br>3  | 0.0623<br>79275 | EREG/SHC1/HBEGF/NRG1/BTC                                                                                                                                                                   |
| WP_ARYL_HYDROCARBON_RECEPTOR_NETPATH                                | 1.6<br>637<br>143<br>81 | 0.0268<br>29213 | PTGS2/CYP1B1/PLAGL1/ESR1/CD36/VEGFA/NRIP1/KLF6/CDKN1A/NFKB1/ARNT/LPL/EP300                                                                                                                 |
| WP_IL5_SIGNALING_PATHWAY                                            | 1.6<br>628<br>233<br>19 | 0.0367<br>9435  | CSF2RB/SHC1/PIK3CG/FOS/STAT5A/SYK/STAT3/JUN/LYN/FOXO3/JAK2/BTK/SPRED1/STAT1/AKT1/RPS6KA1/IL2/BCL2/SOS1/GRB2/STAT5B                                                                         |
| REACTOME_IRE1ALPHA_ACTIVATES_CHAPERONES                             | 1.6<br>618<br>708<br>92 | 0.0272<br>67569 | KDEL3/SHC1/PDIA5/CUL7/WIP1/ERN1/TPP1/TLN1/EDEM1/LMNA/DNAJC3/HSPA5/FKBP14/EXTL3/SRPRAP/DIA6/PLA2G4B/SSR1/SEC31A/SYVN1                                                                       |
| ST_T_CELL_SIGNAL_TRANSDUCTION                                       | 1.6<br>613              | 0.0467<br>42785 | ITK/GRAP2/LCK/CTLA4/PTPRC/NFKB2/CD28/ZAP70/LCP2/VAV1/RASGRP4/CD3D/NFKB1/NFKBIA/NFAT5/RASGRP1/PLCG1                                                                                         |



|                                              |                         |                 |                                                                                                                                                                                                                 |
|----------------------------------------------|-------------------------|-----------------|-----------------------------------------------------------------------------------------------------------------------------------------------------------------------------------------------------------------|
|                                              | 020<br>26               |                 |                                                                                                                                                                                                                 |
| BIOCARTA_SODD_PATHWAY                        | 1.6<br>605<br>559<br>29 | 0.0688<br>31826 | BIRC3/TNFRSF1B/CASP8/RIPK1/TNFRSF1A                                                                                                                                                                             |
| PID_EPHA_FWDPATHWAY                          | 1.6<br>594<br>833<br>1  | 0.0864<br>18308 | EPHA2/LCK/PIK3R6/PIK3CG/EPHA1/PIK3R5/EFNA5/BLK/EPHA3/HCK/VAV2/LYN/ROCK1/PLCG1/FGR/ARHGE<br>F15/EPHA4/CBL                                                                                                        |
| PID_VEGFR1_PATHWAY                           | 1.6<br>585<br>144<br>89 | 0.0659<br>54722 | NRP1/NRP2/CAV1/CD2AP/VEGFA/FLT1/NOS3/HIF1A/PLCG1/RASA1/CBL/PRKACA/AKT1/PIK3CA                                                                                                                                   |
| WP_HEDGEHOG_SIGNALING_PATHWAY_NETPAT<br>H    | 1.6<br>584<br>766<br>75 | 0.0706<br>69489 | GLI1/GLI3/GLI2/DHH/STK36/SMO/SIN3A/PTCH2/GRK2/SHH/KIF7                                                                                                                                                          |
| KEGG_VEGF_SIGNALING_PATHWAY                  | 1.6<br>583<br>708<br>59 | 0.0198<br>64398 | PTGS2/SH2D2A/PLA2G2A/PLA2G2F/PLA2G4E/PIK3CG/MAPK13/NFATC4/PIK3CD/PIK3R5/RAC2/VEGFA/NFAT<br>C2/PLCG2/PLA2G5/NOS3/PXN/PLA2G2D/NFATC1/NFAT5/JMJD7-<br>PLA2G4B/NFATC3/HSPB1/KDR/PLCG1/SPHK1/MAPKAPK2/MAPK14/PLA2G2C |
| BIOCARTA_41BB_PATHWAY                        | 1.6<br>537<br>431<br>03 | 0.0838<br>13349 | TNFRSF9/IFNG/NFKB1/JUN/NFKBIA/MAP3K5/MAPK14/IKBKB/IL2                                                                                                                                                           |
| REACTOME_INTERLEUKIN_12_FAMILY_SIGNALIN<br>G | 1.6<br>509<br>584<br>49 | 0.0198<br>64398 | SOD2/SERPINB2/CNN2/LCP1/IFNG/IL10/IL12B/MSN/ANXA2/IL27RA/STAT3/IL12RB1/P4HB/IL27/TYK2/JAK2/IL2<br>3A/IL23R/MTAP/GSTA2/CA1/STAT1/EBI3/CAPZA1/IL6ST                                                               |
| PID_NFKAPPAB_ATYPICAL_PATHWAY                | 1.6<br>498              | 0.0706<br>69489 | BCL3/LCK/REL/SYK/NFKB1/NFKBIA/MAPK14/IKBKB/PIK3CA                                                                                                                                                               |

|                                                 |                         |                 |                                                                                             |
|-------------------------------------------------|-------------------------|-----------------|---------------------------------------------------------------------------------------------|
|                                                 | 365<br>58               |                 |                                                                                             |
| KEGG_ABC_TRANSPORTERS                           | 1.6<br>468<br>933<br>84 | 0.0367<br>9435  | ABCA13/ABCB11/ABCC3/ABCB5/ABCA6/ABCA7/ABCA1/ABCA12/ABCA8/ABCA9/ABCD1/ABCC9/ABCC1/TAP1/ABCA4 |
| BIOCARTA_SPRY_PATHWAY                           | 1.6<br>467<br>406<br>25 | 0.0777<br>27317 | SHC1/SPRY4/EGF/SPRY1/SPRY2/RASA1/CBL                                                        |
| BIOCARTA_MET_PATHWAY                            | 1.6<br>453<br>750<br>9  | 0.0783<br>39041 | MET/PIK3CG/FOS/ITGB1/MAP4K1/STAT3/JUN/HGF/ACTA1/RASA1/PTK2B/PTEN/PIK3CA/SOS1/GRB2/DOCK1     |
| PID_ECADHERIN_KERATINOCYTE_PATHWAY              | 1.6<br>439<br>919<br>15 | 0.0799<br>96349 | FMN1/CASR/ZYX/JUP/AJUBA/VASP/PLCG1/CTNND1/CTNNA1/AKT1/PIK3CA/PIP5K1A                        |
| REACTOME_REGULATION_OF_TLR_BY_ENDOGENOUS_LIGAND | 1.6<br>412<br>938<br>67 | 0.0839<br>21264 | LBP/APOB/TLR6/TLR2/S100A8/CD14/S100A9/TLR1/CD36/FGG/LY96/SFTPA1/TLR4                        |
| WP_IL7_SIGNALING_PATHWAY                        | 1.6<br>409<br>817<br>16 | 0.0659<br>54722 | IL2RA/IL7R/JAK3/IL2RG/STAT5A/STAT3                                                          |
| REACTOME_CHONDROITIN_SULFATE_BIOSYNTHESIS       | 1.6<br>394<br>771<br>26 | 0.1007<br>42695 | BGN/CHSY3/CHSY1/CHST13/CHPF2/CHST7/CSGALNACT2/CHPF/VCAN/CHST15/DCN/CHST3                    |
| REACTOME_TYPE_I_HEMIDESMOSOME_ASSEMBLY          | 1.6<br>387              | 0.0940<br>88644 | LAMA3/ITGB4/LAMC2/KRT5/PLEC/LAMB3/CD151/COL17A1                                             |

|                                                                                       |                         |                 |                                                                                                                                     |
|---------------------------------------------------------------------------------------|-------------------------|-----------------|-------------------------------------------------------------------------------------------------------------------------------------|
|                                                                                       | 886<br>2                |                 |                                                                                                                                     |
| REACTOME_SEMA3A_PLEXIN_REPULSION_SIGNALLING_BY_INHIBITING_INTEGRIN_ADHESION           | 1.6<br>362<br>369<br>98 | 0.0752<br>8481  | NRP1/SEMA3A/FES/PLXNA1/TLN1/PLXNA3/PLXNA4/RRAS                                                                                      |
| REACTOME_INTERLEUKIN_35_SIGNALLING                                                    | 1.6<br>359<br>094<br>12 | 0.0836<br>15978 | IL27RA/STAT3/TYK2/JAK2/STAT1/EBI3/IL6ST/CANX                                                                                        |
| BIOCARTA_IL3_PATHWAY                                                                  | 1.6<br>351<br>249<br>09 | 0.0776<br>31216 | CSF2RB/SHC1/FOS/STAT5A/PTPN6/JAK2                                                                                                   |
| WP_STRUCTURAL_PATHWAY_OF_INTERLEUKIN_1_IL1                                            | 1.6<br>330<br>728<br>35 | 0.0272<br>67569 | IL1R1/MAP3K8/FOS/IL1RAP/IL1A/IRAK2/MAP3K14/NFKB1/MKNK2/MYD88/MKNK1/NFKBIA/MAP3K3/MAP2K3/IRF7/TRAF6/MAPKAPK2/MAPK14/IRAK1/TAB3/IKBKB |
| BIOCARTA_TFF_PATHWAY                                                                  | 1.6<br>323<br>486<br>94 | 0.0864<br>18308 | SHC1/MUC2/TFF3/PIK3CG/ERBB2/ITGB1                                                                                                   |
| BIOCARTA_GSK3_PATHWAY                                                                 | 1.6<br>316<br>218<br>02 | 0.1007<br>42695 | LBP/FZD1/LEF1/NFKB1/MYD88                                                                                                           |
| REACTOME_FOXO_MEDIATED_TRANSCRIPTION_OF_OXIDATIVE_STRESS_METABOLIC_AND_NEURONAL_GENES | 1.6<br>310<br>744<br>97 | 0.0943<br>86035 | RETN/SOD2/PCK1/ABCA6/FBXO32/TRIM63/FOXO1/IGFBP1/SMAD3/FOXO3/PLXNA4/SREBF1/SIN3A                                                     |
| BIOCARTA_ARAP_PATHWAY                                                                 | 1.6<br>292              | 0.0838<br>13349 | CYTH4/ASAP2/ARAP1/ARAP2/CYTH3/ARFGEF1/ARFGEF2/ASAP1                                                                                 |

|                                                                     |                         |                 |                                                                                                                                                                                                                    |
|---------------------------------------------------------------------|-------------------------|-----------------|--------------------------------------------------------------------------------------------------------------------------------------------------------------------------------------------------------------------|
|                                                                     | 871<br>22               |                 |                                                                                                                                                                                                                    |
| REACTOME_CONSTITUTIVE_SIGNALING_BY_ABE<br>RRANT_PI3K_IN_CANCER      | 1.6<br>272<br>870<br>98 | 0.0198<br>64398 | EREG/ICOS/MET/AREG/LCK/FGF19/TRAT1/FGF10/ERBB2/FGFR1/CD80/PIK3CD/CD28/PIK3AP1/RAC2/ESR1/<br>ESR2/VAV1/HBEGF/EGF/PDGFRB/IRS1/NRG1/IRS2/FGF5/KL/HGF/BTC/KITLG/PDGFA/CD86                                             |
| WP_ACE_INHIBITOR_PATHWAY                                            | 1.6<br>247<br>075<br>74 | 0.0838<br>13349 | BDKRB1/CTSG/BDKRB2/AGTR2/CMA1/TGFB1/AGTR1/ACE/NOS3                                                                                                                                                                 |
| REACTOME_DDX58_IFIH1_MEDIATED_INDUCION<br>_OF_INTERFERON_ALPHA_BETA | 1.6<br>229<br>720<br>67 | 0.0198<br>64398 | TNFAIP3/SAA1/NFKB2/NLRC5/IKBKE/NFKB1/RNF135/CASP8/RIPK1/UBA7/CASP10/NFKBIA/S100A12/TRAF3/<br>NLRX1/DDX58/RNF216/IFNA5/IFNA14/IFIH1/EP300/IRF7/MAVS/TRAF6/TRIM25/DHX58/HERC5/IFNB1/IKBKB/C<br>YLD/APP/CREBBP/IFNA17 |
| REACTOME_RORA_ACTIVATES_GENE_EXPRESSI<br>ON                         | 1.6<br>215<br>909<br>75 | 0.0838<br>13349 | HELZ2/RORA/TBL1X/EP300/SREBF1/RXRA/CREBBP/CARM1/CPT1A/PPARA/NCOA1/NCOA6/MED1/TGS1                                                                                                                                  |
| BIOCARTA_D4GDI_PATHWAY                                              | 1.6<br>215<br>086<br>32 | 0.0948<br>21802 | PRF1/GZMB/CASP8/JUN/CASP1/CASP10                                                                                                                                                                                   |
| REACTOME_ACYL_CHAIN_REMODELLING_OF_PE                               | 1.6<br>205<br>087<br>99 | 0.0831<br>17236 | PLA2R1/PLA2G2A/PLA2G2F/PLBD1/MBOAT1/PLA2G4E/PLA2G5/PLA2G2D/LPCAT3/PLA2G4D/PLA2G4F                                                                                                                                  |
| PID_NECTIN_PATHWAY                                                  | 1.6<br>196<br>340<br>13 | 0.0943<br>86035 | ITGB3/IQGAP1/CLDN1/PDGFRB/NECTIN2/TLN1/VAV2/PVR/F11R/CTNNA1/ITGAV/PDGFB/NECTIN3/PIK3CA                                                                                                                             |
| REACTOME_OVARIAN_TUMOR_DOMAIN_PROTEA<br>SES                         | 1.6<br>192              | 0.0799<br>96349 | TNFAIP3/NOD2/TNIP3/ESR1/RNF135/RIPK1/TRAF3/DDX58/IFIH1/MAVS/TRAF6/TRIM25/TP53/OTUD7B/TNIP1/<br>OTUD3                                                                                                               |

|                                                                       |                         |                 |                                                                                                                                                                                                                               |
|-----------------------------------------------------------------------|-------------------------|-----------------|-------------------------------------------------------------------------------------------------------------------------------------------------------------------------------------------------------------------------------|
|                                                                       | 787<br>4                |                 |                                                                                                                                                                                                                               |
| REACTOME_UNFOLDED_PROTEIN_RESPONSE_UPR_                               | 1.6<br>191<br>323<br>93 | 0.0198<br>64398 | CXCL8/KDEL3/CCL2/SHC1/PDIA5/CEBPB/CUL7/CREB3L1/WIPI1/ERN1/TPP1/TLN1/EDEM1/CREB3L2/LMNA/DNAJC3/IGFBP1/HSPA5/FKBP14/EXTL3/SRPRA/DCSTAMP/PDIA6/ATF3/HSP90B1/PLA2G4B/CALR/SSR1/EIF2S3/SEC31A/SYVN1/ATF6/HYOU1/EIF2AK3/PARN/MBTPS2 |
| REACTOME_SIGNALING_BY_ERBB2_IN_CANCER                                 | 1.6<br>166<br>172<br>28 | 0.0729<br>37146 | EREG/SHC1/ERBB2/HBEGF/EGF/PTPN12/NRG1/BTC/PLCG1/ERBIN                                                                                                                                                                         |
| REACTOME_FOXO_MEDIATED_TRANSCRIPTION                                  | 1.6<br>146<br>157<br>91 | 0.0198<br>64398 | RETN/FASLG/SOD2/PCK1/ABCA6/CAV1/FBXO32/CDKN1A/TRIM63/SFN/FOXO1/CITED2/KLF4/IGFBP1/GADD45A/SMAD3/BCL6/BCL2L1/FOXO3/EP300/PLXNA4/SREBF1/SIN3A                                                                                   |
| REACTOME_PI3K_AKT_SIGNALING_IN_CANCER                                 | 1.6<br>127<br>510<br>26 | 0.0198<br>64398 | EREG/ICOS/MET/AREG/LCK/FGF19/TRAT1/FGF10/ERBB2/FGFR1/CD80/PIK3CD/CD28/PIK3AP1/NR4A1/RAC2/ESR1/ESR2/VAV1/HBEGF/EGF/PDGFRB/IRS1/CDKN1A/NRG1/IRS2/FOXO1/FGF5/KL/HGF/BTC/PRR5/FOXO3/KITLG/PDGFA/CD86                              |
| WP_SIGNALING_OF_HEPATOCYTE_GROWTH_FACTOR_RECEPTOR                     | 1.6<br>106<br>112<br>23 | 0.0864<br>18308 | MET/FOS/ITGB1/MAP4K1/ITGA1/STAT3/JUN/PXN/HGF/RASA1/PTK2B/PTEN/PIK3CA/SOS1/GRB2/DOCK1                                                                                                                                          |
| REACTOME_SIGNALING_BY_EGFR_IN_CANCER                                  | 1.6<br>083<br>039<br>61 | 0.0928<br>57143 | EREG/SHC1/AREG/HBEGF/EGF                                                                                                                                                                                                      |
| REACTOME_OTHER_INTERLEUKIN_SIGNALING                                  | 1.6<br>080<br>645<br>29 | 0.0933<br>82007 | CSF3/SDC1/CSF3R/CD4/CSF1R/CSF1/STXBP2/IL16/IFNLR1/TYK2/IL32/IL10RB/PRTN3/TXLNA                                                                                                                                                |
| WP_FGF23_SIGNALLING_IN_HYPOPHOSPHATEMIC_RICKETS_AND_RELATED_DISORDERS | 1.6<br>075              | 0.0928<br>57143 | ROS1/FAM20C/NFKB2/ENPP1/GALNT3/CDKN1A/NFKB1/SLC34A3/KL/SPP1/CYP24A1/DMP1                                                                                                                                                      |

|                                             |                         |                 |                                                                                                                                                                                                                                                                                                                                                    |
|---------------------------------------------|-------------------------|-----------------|----------------------------------------------------------------------------------------------------------------------------------------------------------------------------------------------------------------------------------------------------------------------------------------------------------------------------------------------------|
|                                             | 456<br>83               |                 |                                                                                                                                                                                                                                                                                                                                                    |
| REACTOME_ACYL_CHAIN_REMODELLING_OF_PG       | 1.6<br>069<br>387<br>07 | 0.0895<br>49328 | PLA2R1/PLA2G2A/PLA2G2F/PLA2G5/PLA2G2D/PLA2G4D/PLA2G4F/PLA2G4B/LPCAT1                                                                                                                                                                                                                                                                               |
| BIOCARTA_ETS_PATHWAY                        | 1.6<br>058<br>568<br>49 | 0.0838<br>13349 | FOS/CSF1R/CSF1/JUN/SIN3A/ETV3/SIN3B/NCOR2/ETS2/ETS1/RBL1                                                                                                                                                                                                                                                                                           |
| KEGG_TGF_BETA_SIGNALING_PATHWAY             | 1.6<br>052<br>087<br>66 | 0.0198<br>64398 | THBS1/FST/INHBA/LTBP1/TGFBR2/COMP/CDKN2B/THBS3/TGFB2/IFNG/INHBE/GDF5/TGFB1/THBS2/TGFB3/ NHBB/SP1/BMP5/ACVRL1/SMAD1/ROCK1/SMAD3/ROCK2/EP300                                                                                                                                                                                                         |
| REACTOME_INTERLEUKIN_7_SIGNALING            | 1.6<br>052<br>058<br>5  | 0.0864<br>18308 | IL7R/CISH/TSLP/JAK3/IL2RG/CRLF2/STAT5A/SOCS1/IRS1/RAG1/IRS2/STAT3                                                                                                                                                                                                                                                                                  |
| REACTOME_SHC1_EVENTS_IN_ERBB2_SIGNALIN<br>G | 1.6<br>049<br>262<br>85 | 0.0928<br>57143 | EREG/SHC1/ERBB2/HBEGF/EGF/PTPN12/NRG1/PRKCD/BTC                                                                                                                                                                                                                                                                                                    |
| WP_ECTODERM_DIFFERENTIATION                 | 1.6<br>021<br>359<br>26 | 0.0199<br>95966 | GATA6/ROR2/TFAP2C/CCL2/KRT6A/STC1/GLI3/ST8SIA4/ELOVL2/FZD8/FHL2/FZD5/MAFB/FOXA2/ARX/PIM1/ TRPM2/PLCXD3/FOXL1/MIR34C/RRBP1/BOC/EDA2R/JUP/ZBTB7B/PODXL/TSKU/CDH6/SPRY2/ZFH4/DMD/S ORCS1/PPARD/POU2F2/NFATC1/FZD4/NR2F2/TBL1X/CCDC88C/ZBTB2/WDR44/SMURF1/GLB1/CDON/TNFR SF11B/BAZ1A/LY6E/WNT1/C1GALT1/EDA/PLXNA2/SHH/SDCBP/MZF1/HDAC10/SOCS2/ARHGAP10 |
| WP_PDGFREBETA_PATHWAY                       | 1.6<br>019<br>805<br>71 | 0.0951<br>25409 | SHC1/STAT6/FOS/STAT5A/PDGFRB/STAT3/SRF/JUN/PLCG1/JAK2/RASA1/STAT1/PIK3CA/SOS1/PRKCA/GRB 2/STAT5B                                                                                                                                                                                                                                                   |
| BIOCARTA_ARF_PATHWAY                        | 1.6<br>012              | 0.0838<br>13349 | PIK3CG/TWIST1/CDKN2A/TBX2/TP53/ABL1/PIK3CA/POLR1A                                                                                                                                                                                                                                                                                                  |

|                                                                 |                         |                 |                                                                                                                                                                                                                                                                  |
|-----------------------------------------------------------------|-------------------------|-----------------|------------------------------------------------------------------------------------------------------------------------------------------------------------------------------------------------------------------------------------------------------------------|
|                                                                 | 362<br>17               |                 |                                                                                                                                                                                                                                                                  |
| BIOCARTA_TGFB_PATHWAY                                           | 1.6<br>008<br>643<br>14 | 0.1007<br>42695 | TGFBR2/TGFB2/TGFB1/TGFB3/SMAD3/EP300/CREBBP/TGFBR1/MAP3K7                                                                                                                                                                                                        |
| KEGG_DORSO_VENTRAL_AXIS_FORMATION                               | 1.6<br>003<br>004<br>12 | 0.0987<br>99784 | NOTCH3/PIWIL1/ETV7/NOTCH2/ETV6/PIWIL4/PIWIL2/ETS2/SOS1/NOTCH4/ETS1/SPIRE1/GRB2                                                                                                                                                                                   |
| PID_S1P_S1P1_PATHWAY                                            | 1.5<br>995<br>804<br>78 | 0.1040<br>64039 | PTGS2/ITGB3/PLCB2/PDGFRB/VEGFA/ABCC1/KDR/PLCG1/SPHK1/ITGAV/PDGFB                                                                                                                                                                                                 |
| WP_NCRNAS_INVOLVED_IN_WNT_SIGNALING_IN_HEPATOCELLULAR_CARCINOMA | 1.5<br>995<br>473<br>03 | 0.0198<br>64398 | ROR2/SFRP2/DKK1/SFRP4/FZD1/WNT3A/FZD7/FZD8/FOSL1/FZD5/ROR1/PLAU/LEF1/SERPINF1/SOST/SFRP5/JUN/FZD10/KLF4/DKK2/FZD2/NKD2/CER1/FZD6                                                                                                                                 |
| PID_ALK1_PATHWAY                                                | 1.5<br>988<br>709<br>08 | 0.0859<br>72    | INHBA/TGFBR2/TGFB1/ENG/CAV1/TGFB3/ACVRL1/SMAD1                                                                                                                                                                                                                   |
| WP_MAMMARY_GLAND_DEVELOPMENT_PATHWAY_INVOLUTION_STAGE_4_OF_4    | 1.5<br>980<br>024<br>55 | 0.1259<br>11878 | SOCS3/CHI3L1/MMP9/STAT3                                                                                                                                                                                                                                          |
| WP_EICOSANOID_METABOLISM_VIA_LIPO_OXYGENASES_LOX                | 1.5<br>966<br>288<br>44 | 0.0951<br>25409 | FPR2/TRPA1/LTB4R2/CYP4F2/LTB4R/ALOX5/CYP4F12/TRPV1/ALOX15B/ACOX2/PPARD/CYSLTR1/GGT5                                                                                                                                                                              |
| REACTOME_GPCR_LIGAND_BINDING                                    | 1.5<br>961              | 0.0459<br>01829 | CCL13/CCL11/CCL20/CXCL13/XCR1/CXCL5/CCR8/CCL7/ADGRE3/GNGT1/HCAR3/BDKRB1/FPR2/HCAR2/CCR2/CCR4/CXCR3/PPBP/CXCR1/CXCL8/CXCL3/PTGER2/MC3R/PTGFR/UTS2/CCL23/CXCL1/GCG/GIP/PTGER4/FZD1/PROK2/BDKRB2/P2RY10/MTNR1B/CCL2/CXCL2/CCL22/ADGRE2/CMKLR1/INSL3/FPR3/GPR39/WNT3 |

|                                                                    |                         |                 |                                                                                                                                                                                                                                                                                                                                                                                                                        |
|--------------------------------------------------------------------|-------------------------|-----------------|------------------------------------------------------------------------------------------------------------------------------------------------------------------------------------------------------------------------------------------------------------------------------------------------------------------------------------------------------------------------------------------------------------------------|
|                                                                    | 097<br>88               |                 | A/AGTR2/F2RL1/C5AR1/PROKR1/CXCR5/NPY2R/CCR7/CCR5/HRH2/CCR6/CXCL6/FZD7/PTGIR/NTS/CXCL9/CCR1/GPR132/ADGRE1/LTB4R2/P2RY6/HTR1D/FZD8/LTB4R/FZD5/FFAR2/C3/FFAR3/GPR18/SAA1/P2RY4/TAS2R60/F2RL3/CCR3/CXCR2/GPR31/CXCR6/S1PR4/ADM/TAS2R40/CXCL12/C5AR2/CCL5/HCRTR1/CALCR/TAC3/F2RL2/FPR1/CASR/HRH1/C3AR1/GPR183/PTAFR/GPBAR1/DHH/GRPR/C5/P2RY1/QRFP/CNR2/PYY/XCL2/HTR7/KISS1R/ECE1/SUCNR1/CNR1/AGTR1/OXER1/TBXA2R/OXTR/ADGRE5 |
| PID_CXCR3_PATHWAY                                                  | 1.5<br>960<br>978<br>68 | 0.0551<br>24569 | CCL11/CXCL13/CXCR3/CXCL9/ITGB2/PIK3CD/ITGAL                                                                                                                                                                                                                                                                                                                                                                            |
| WP_BILE_ACIDS_SYNTHESIS_AND_ENTEROHEPATIC_CIRCULATION              | 1.5<br>939<br>042<br>09 | 0.1001<br>45581 | SLC10A2/ABCB11/FGF19/LDLR/CYP7A1                                                                                                                                                                                                                                                                                                                                                                                       |
| WP_SRF_AND_MIRS_IN_SMOOTH_MUSCLE_DIFFERENTIATION_AND_PROLIFERATION | 1.5<br>932<br>644<br>8  | 0.1001<br>45581 | MIR199A1/SRF/KLF4/MYOC/MEF2A/CAMK2D/MEF2D/MEF2B                                                                                                                                                                                                                                                                                                                                                                        |
| PID_CASPASE_PATHWAY                                                | 1.5<br>923<br>679<br>78 | 0.0475<br>07788 | KRT18/BIRC3/PRF1/CASP4/LMNA/GZMB/LIMK1/CASP8/CASP7/RIPK1/VIM/CASP1/CASP10/TNFRSF1A/CASP2/PIDD1/SREBF1/ACTA1/ARHGDI1/APP/CASP6/GSN/TRADD/TOP1/NUMA1/BCL2                                                                                                                                                                                                                                                                |
| WP_PEPTIDE_GPCRS                                                   | 1.5<br>906<br>464<br>76 | 0.0198<br>64398 | CCR8/BDKRB1/FPR2/CCR2/CCR4/CXCR3/CXCR1/MC3R/BDKRB2/FPR3/AGTR2/C5AR1/CXCR5/NPY2R/CCR7/CCR5/CCR6/CCR1/CCR3/CXCR2/CXCR6/HCRTR1/FPR1/C3AR1/GRPR/AGTR1/OXTR                                                                                                                                                                                                                                                                 |
| KEGG_FC_GAMMA_R_MEDIATED_PHAGOCYTOSIS                              | 1.5<br>900<br>878<br>5  | 0.0198<br>64398 | FCGR2C/FCGR2A/FCGR2B/PLA2G4E/PTPRC/PIK3CG/ARPC1B/DOCK2/FCGR3A/PIK3CD/PIK3R5/SCIN/RAC2/VAV1/SYK/WAS/HCK/INPP5D/PLCG2/VAV2/LIMK1/NCF1/ASAP2/PRKCD/LYN/ARF6/VASP/WASF2/PLA2G4D/PLCG1/PLA2G4F/FCGR1A/LIMK2/SPHK1/PLA2G4B/PLD2/LAT/ASAP3/ASAP1/AKT1/GSN/VAV3/PIK3CA/PIP5K1A/WASL/PIKFYVE                                                                                                                                    |
| BIOCARTA_FREE_PATHWAY                                              | 1.5<br>897<br>391<br>54 | 0.1259<br>11878 | XDH/CXCL8/NFKB1                                                                                                                                                                                                                                                                                                                                                                                                        |



|                                                                            |                         |                 |                                                                                                                                               |
|----------------------------------------------------------------------------|-------------------------|-----------------|-----------------------------------------------------------------------------------------------------------------------------------------------|
| REACTOME_KERATAN_SULFATE_KERATIN_META<br>BOLISM                            | 1.5<br>869<br>437<br>15 | 0.1001<br>45581 | KERA/LUM/B4GALT1/ST3GAL1/CHST2/OGN/GNS/B3GNT2/HEXB/GALNS/PRELP/FMOD/B3GNT3/B4GALT5/G<br>LB1/HEXA                                              |
| BIOCARTA_IGF1_PATHWAY                                                      | 1.5<br>859<br>025<br>53 | 0.1105<br>71081 | SHC1/PIK3CG/FOS/IRS1/SRF/JUN/IGF1R/RASA1/IGF1/PIK3CA/SOS1/GRB2                                                                                |
| ST_PHOSPHOINOSITIDE_3_KINASE_PATHWAY                                       | 1.5<br>837<br>888<br>69 | 0.0938<br>73927 | SHC1/TEC/S100A9/DAPP1/INPP5D/RPS6KA3/SFN/FOXO1/IGFBP1/CYTH3/CD55/CDKN2A/BTK/AKT1/RPS6KA<br>1/PTEN/PIK3CA/SOS1/GRB2/RPS6KA2/RPS6KB1/AKT2/PDPK1 |
| BIOCARTA_RNA_PATHWAY                                                       | 1.5<br>832<br>716<br>75 | 0.1259<br>11878 | MAP3K14/DNAJC3/NFKB1/NFKBIA/TP53                                                                                                              |
| ST_JNK_MAPK_PATHWAY                                                        | 1.5<br>820<br>504<br>82 | 0.1001<br>45581 | PAPPA/IL1R1/SHC1/DUSP4/JUN/MAP3K20/GADD45A/MAP3K3/NFATC3/MAP3K12/TRAF6/MAP3K5/TP53/MAP<br>3K2/MAP3K11/AKT1/TAB2/MAPK7/MAP3K7/NR2C2/DLD        |
| REACTOME_FORMATION_OF_FIBRIN_CLOT_CLOT<br>TING_CASCADE_                    | 1.5<br>818<br>323<br>83 | 0.0938<br>73927 | F13A1/CD177/THBD/A2M/PF4V1/SERPING1/PROS1/F3/FGG/F11/GP1BA/VWF/F2R/PF4/KLKB1                                                                  |
| REACTOME_SIGNAL_ATTENUATION                                                | 1.5<br>815<br>589<br>66 | 0.1259<br>11878 | SHC1/GRB10/IRS1/IRS2/INSR/SOS1/GRB2                                                                                                           |
| WP_ENVELOPE_PROTEINS_AND_THEIR_POTENTI<br>AL_ROLES_IN_EDMD_PHYSIOPATHOLOGY | 1.5<br>814<br>403<br>01 | 0.0557<br>91636 | TGFB2/ADCY7/CCN2/TGFB1/TGFB3/ADCY3/SRF/SYNE3/SYNE4/ADCY4/SMAD3/SYNE2/PLEC/ADCY6/SUN1/<br>ADCY9                                                |

|                                            |                         |                 |                                                                                                                                                                                                                                                                                                                                                                                                                                                                                                                                                     |
|--------------------------------------------|-------------------------|-----------------|-----------------------------------------------------------------------------------------------------------------------------------------------------------------------------------------------------------------------------------------------------------------------------------------------------------------------------------------------------------------------------------------------------------------------------------------------------------------------------------------------------------------------------------------------------|
| ST_INTEGRIN_SIGNALING_PATHWAY              | 1.5<br>808<br>633<br>35 | 0.0198<br>64398 | GRB7/ITGA2/ITGA11/SHC1/ITGA4/ITGA3/ACTN1/ITGA5/ITGA10/CAV1/ZYX/TLN1/WAS/PLCG2/ITGA1/ITGA7/P4HB/VASP/ROCK1/ITGA9/ROCK2/PLCG1/CDKN2A/ARHGAP26/ACTR2/ARHGEF6/MAP3K11/ITGA8/ABL1/ASAP1/TLN2/AKT1/BRAF/PTEN/ITGA6/PIK3CA                                                                                                                                                                                                                                                                                                                                 |
| REACTOME_RHO_GTPASE_CYCLE                  | 1.5<br>807<br>872<br>4  | 0.0198<br>64398 | SYDE2/DLC1/A2M/ARHGAP30/RHOD/ARHGEF35/RAC2/VAV1/ARHGAP4/ARHGAP29/ARHGAP9/ARHGAP45/RHOH/ARHGAP6/STARD8/ARHGAP18/FGD2/AKAP13/RHOJ/VAV2/TRIP10/STARD13/ARHGEF5/ARHGAP40/ARHGAP27/RALBP1/PLEKHG2/SYDE1/ARAP1/ARAP2/MYO9B/ARHGEF19/ARHGEF26/GMIP/ARHGEF1/ARHGEF40/TAGAP/TRIO/ARHGEF18/SRGAP2/ARHGEF15/ARHGAP24/RHOBTB1/ARHGEF12/ARHGAP26/ARHGEF10/FGD4/ARHGAP25/ARHGEF6/ARHGAP20/ARHGDI/ARHGAP8/ARHGAP10/INPP5B/ARHGAP1/ARAP3/VAV3/MYO9A/SRGAP1/ARHGAP11A/SOS1/GNA13/TIAM1/PREX1/PLEKHG5                                                                 |
| BIOCARTA_VEGF_PATHWAY                      | 1.5<br>795<br>270<br>86 | 0.1001<br>45581 | SHC1/PIK3CG/FLT4/VEGFA/ARNT/FLT1/NOS3/HIF1A/KDR/PLCG1                                                                                                                                                                                                                                                                                                                                                                                                                                                                                               |
| REACTOME_METABOLISM_OF_CARBOHYDRATES       | 1.5<br>793<br>046<br>6  | 0.0330<br>41667 | KERA/LUM/LYVE1/HS3ST3B1/SDC1/HK3/PCK1/HAS3/CEMIP/HAS1/B4GALT1/HSPG2/BGN/CHSY3/ST3GAL1/DSE/GPC4/CD44/SLC37A2/PYGL/CHSY1/CHST13/SLC26A2/GAA/MAN2B1/HPSE/HS3ST3A1/GUSB/CHST2/FUT7/STAB2/OGN/GNS/HGSNAT/HK2/B3GNT2/SLC9A1/NUP210/CHPF2/MAN2B2/HEXB/CHST7/PCK2/PAPSS2/GCKR/POM121/PRPS2/POM121C/PFKFB3/GPC1/GBE1/B3GALT5/GALNS/FUT4/MANBA/SLC2A1/FBP1/HS6ST1/GPC5/CSGALNACT2/SGSH/XYL2/GYS1/AGRN/PRELP/SDC2/FMOD/NUP98/CHST14/CHPF/GPC6/VCAN/ARSB/B3GNT3/TPR/SDC4/EXT1/PFKL/CHST15/DCN/CHST3/B4GALT5/XYLB/B3GALT1/PHKA2/GLB1/ADPGK/PGM2L1/EXT2/IDUA/HAS2 |
| BIOCARTA_PITX2_PATHWAY                     | 1.5<br>782<br>437<br>56 | 0.0895<br>49328 | FZD1/LEF1/TRRAP/EP300/WNT1/CREBBP/PITX2/HDAC1/MED1                                                                                                                                                                                                                                                                                                                                                                                                                                                                                                  |
| WP_GLOBO_SPHINGOLIPID_METABOLISM           | 1.5<br>767<br>164<br>04 | 0.1156<br>58363 | GCNT1/A4GALT/ST3GAL1/GALNT2/ST6GALNAC5/ST6GALNAC2/GBGT1/B3GALT5                                                                                                                                                                                                                                                                                                                                                                                                                                                                                     |
| REACTOME_TOLL_LIKE_RECEPTOR_9_TLR9_CASCADE | 1.5<br>766<br>939<br>14 | 0.0198<br>64398 | NOD2/TLR8/TICAM2/SAA1/MAP3K8/NFKB2/CD14/TLR9/FOS/TLR7/DUSP4/TICAM1/IRAK2/NFKB1/RPS6KA3/MYD88/JUN/NFKBIA/S100A12/LY96/DUSP6/MAP2K3/IRF7/TRAF6/MEF2A/DUSP3/TLR4/MAPKAPK2/MAPK14/IRAK1/TAB3/EEA1/IKBKB/APP/CUL1/RPS6KA1/TAB2                                                                                                                                                                                                                                                                                                                           |

|                                                          |                         |                 |                                                                                                                                                                                                                                                               |
|----------------------------------------------------------|-------------------------|-----------------|---------------------------------------------------------------------------------------------------------------------------------------------------------------------------------------------------------------------------------------------------------------|
| WP_DNA_DAMAGE_RESPONSE_ONLY_ATM_DEPENDENT                | 1.5<br>757<br>102<br>03 | 0.0198<br>64398 | FASLG/SOD2/SHC1/WNT3A/LDLR/FOSL1/PIK3CG/ERBB2/PIK3CD/NFKB2/PIK3R5/MLKL/PLAU/RAC2/LEF1/TGFB1/IRS1/CDKN1A/NFKB1/PCK2/JUN/SMAD3/BCL6/BCL2L11/FOXO3/PMAIP1/CDKN2A/INSR/TP53/TCF7/WNT1/ATM/ABL1/WNT5B/AKT1/PIK3C2A/PTEN/PIK3CA/BCL2                                |
| WP_TRANSCRIPTIONAL_CASCADE_REGULATING_ADIPOGENESIS       | 1.5<br>743<br>560<br>76 | 0.0986<br>09827 | KLF5/GATA3/EGR2/CEBPB/CEBPD                                                                                                                                                                                                                                   |
| WP_OVARIAN_INFERTILITY_GENES                             | 1.5<br>693<br>744<br>12 | 0.0957<br>37909 | VDR/PTGER2/DAZL/PRLR/EGR1/CEBPB/ESR2/NRIP1/MSH5/SMAD3/DMC1/SYNE2                                                                                                                                                                                              |
| REACTOME_TRAF6_MEDIATED_IRF7_ACTIVATION                  | 1.5<br>677<br>261<br>19 | 0.1007<br>42695 | IKBKE/RNF135/DDX58/IFNA5/IFNA14/IFIH1/EP300/IRF7/MAVS/TRAF6/TRIM25/IFNB1/CREBBP/IFNA17                                                                                                                                                                        |
| REACTOME_P130CAS_LINKAGE_TO_MAPK_SIGNALING_FOR_INTEGRINS | 1.5<br>662<br>075<br>13 | 0.0951<br>25409 | FN1/ITGB3/TLN1/FGG/VWF/APBB1P/ITGA2B                                                                                                                                                                                                                          |
| REACTOME_NEGATIVE_REGULATION_OF_THE_PI3K_AKT_NETWORK     | 1.5<br>648<br>683<br>62 | 0.0198<br>64398 | EREG/ICOS/MET/AREG/LCK/FGF19/TRAT1/IER3/FGF10/ERBB2/FGFR1/CD80/PIK3CD/IL1RL1/CD28/PIK3AP1/RAC2/IL1RAP/ESR1/ESR2/VAV1/HBEGF/EGF/PDGFRB/IRS1/NRG1/IRS2/MYD88/FGF5/KL/HGF/BTC/KITLG/PDGFA/CD86/TRAF6                                                             |
| REACTOME_SIGNALING_BY_WNT_IN_CANCER                      | 1.5<br>646<br>167<br>75 | 0.1046<br>90308 | DKK1/WNT3A/FZD8/FZD5/DKK2/KREMEN2/FZD4/FZD6                                                                                                                                                                                                                   |
| REACTOME_CIRCADIAN_CLOCK                                 | 1.5<br>644<br>833<br>69 | 0.0198<br>64398 | SERPINE1/NAMPT/BHLHE40/SIK1/HELZ2/NPAS2/ELOVL3/NRIP1/RORA/HIF1A/ARNTL2/NOCT/TBL1X/EP300/SREBF1/CLOCK/PER1/RAI1/BHLHE41/RXRA/MEF2D/CRTC2/CREBBP/CARM1/CUL1/NFIL3/NR1D1/CPT1A/CSNK1D/NCOR1/CRTC3/PPARA/NCOA1/UBC/NCOA6/PER2/PPARGC1A/NR3C1/ARNTL/MED1/CRY1/TGS1 |

|                                                                 |                         |                 |                                                                                                                           |
|-----------------------------------------------------------------|-------------------------|-----------------|---------------------------------------------------------------------------------------------------------------------------|
| REACTOME_LDL_CLEARANCE                                          | 1.5<br>638<br>574<br>5  | 0.1125<br>99394 | APOB/LDLR/SOAT2/CES3/SOAT1/NPC2/NPC1/AP2A2/LDLRAP1/AP2A1/NCEH1/CLTC                                                       |
| REACTOME_INFLAMMASOMES                                          | 1.5<br>631<br>687<br>78 | 0.1294<br>23605 | MEFV/NFKB2/NLRC4/NLRP3/NFKB1/PSTPIP1/CASP1/AIM2                                                                           |
| KEGG_BASAL_CELL_CARCINOMA                                       | 1.5<br>620<br>844<br>83 | 0.0385<br>57536 | FZD1/WNT3A/GLI1/FZD7/GLI3/GLI2/FZD8/FZD5/LEF1/STK36/FZD10/SMO/FZD2/FZD4/FZD6/PTCH2/TP53/TCF7/WNT1/SHH/WNT5B               |
| REACTOME_SMAD2_SMAD3_SMAD4_HETEROTRIMER_REGULATES_TRANSCRIPTION | 1.5<br>604<br>681<br>32 | 0.0957<br>37909 | SERPINE1/CDKN2B/ATP1B4/WWTR1/JUNB/SP1/SMAD3/CCNK/CCNT1/TFDP1/RNF111/UBC/TGIF1/RBL1/HDAC1/TGIF2/MEN1/SMAD2/SMAD7/SNW1/E2F4 |
| BIOCARTA_LONGEVITY_PATHWAY                                      | 1.5<br>603<br>406<br>26 | 0.0951<br>25409 | SOD2/SHC1/PIK3CG/FOXO3/SOD3/GHR/IGF1R/AKT1/IGF1/PIK3CA                                                                    |
| REACTOME_NICOTINAMIDE_SALVAGING                                 | 1.5<br>592<br>703<br>89 | 0.1125<br>99394 | PTGS2/NAMPT/PTGIS/NNMT/PARP14/PARP10/PARP4                                                                                |
| REACTOME_TRP_CHANNELS                                           | 1.5<br>573<br>349<br>07 | 0.1001<br>45581 | TRPA1/TRPM8/TRPV4/TRPM2/MLKL/TRPC7/TRPM5/RIPK3/TRPV1/TRPV2/RIPK1/TRPM3/TRPM7/MCOLN2/TRPM4                                 |
| REACTOME_SEMA4D_IN_SEMAPHORIN_SIGNALING                         | 1.5<br>554<br>826<br>25 | 0.1164<br>76049 | MET/MYH9/ERBB2/MYL9/LIMK1/MYH11/ROCK1/ROCK2/RRAS/LIMK2/ARHGEF12                                                           |

|                                                                            |                         |                 |                                                                                                                                                                                          |
|----------------------------------------------------------------------------|-------------------------|-----------------|------------------------------------------------------------------------------------------------------------------------------------------------------------------------------------------|
| REACTOME_PI3K_EVENTS_IN_ERBB4_SIGNALING                                    | 1.5<br>548<br>601<br>01 | 0.1417<br>92019 | EREG/HBEGF/NRG1/BTC                                                                                                                                                                      |
| REACTOME_INTERLEUKIN_27_SIGNALING                                          | 1.5<br>524<br>944<br>49 | 0.1424<br>44123 | IL27RA/STAT3/IL27/TYK2/JAK2/STAT1/EBI3/IL6ST/CANX                                                                                                                                        |
| BIOCARTA_ATM_PATHWAY                                                       | 1.5<br>521<br>761<br>26 | 0.1349<br>1386  | CDKN1A/NFKB1/JUN/NFKBIA/GADD45A/BRCA1/TP53/ATM/ABL1/RBBP8/RAD50                                                                                                                          |
| WP_OXYSTEROLS_DERIVED_FROM_CHOLESTEROL                                     | 1.5<br>501<br>565<br>75 | 0.1331<br>05802 | NR1I2/ESR1/ESR2/GPR183/CYP7A1/CH25H/RORC/IL25/HSD3B7                                                                                                                                     |
| REACTOME_TNFR1_INDUCED_NFKAPPAB_SIGNALING_PATHWAY                          | 1.5<br>499<br>671<br>21 | 0.1125<br>99394 | TNFAIP3/BIRC3/TRAF1/RIPK1/TNFRSF1A/RNF31/OTUD7B/TAB3/IKBKB/CYLD/TRADD/TAB2/MAP3K7/USP4/RBCK1/UBC/TNF/TRAF2/XIAP/IKBKG                                                                    |
| KEGG_GLYCOSAMINOGLYCAN_BIOSYNTHESIS_KERATAN_SULFATE                        | 1.5<br>498<br>158<br>29 | 0.1005<br>72339 | B4GALT1/ST3GAL1/CHST2/B3GNT2/CHST4                                                                                                                                                       |
| REACTOME_ANTIGEN_PROCESSING_CROSS_PPRESENTATION                            | 1.5<br>496<br>573<br>03 | 0.0198<br>64398 | MRC1/MRC2/CYBB/TLR6/TLR2/CD14/NCF2/TLR1/CD36/CTSS/ITGB5/TAPBP/CTSL/NCF1/PDIA3/HLA-C/MYD88/HLA-B/LNPEP/TAP1/LY96/HLA-F/NCF4/PSME4/HLA-E/FCGR1A/TLR4/TIRAP/BTK/CALR/TAP2/HLA-G/ITGAV/IKBKB |
| REACTOME_POU5F1_OCT4_SOX2_NANOG_REPRESSOR_GENES_RELATED_TO_DIFFERENTIATION | 1.5<br>489<br>793<br>97 | 0.1417<br>92019 | GATA6/DKK1/EOMES                                                                                                                                                                         |

|                                          |                         |                 |                                                                                                                                                                               |
|------------------------------------------|-------------------------|-----------------|-------------------------------------------------------------------------------------------------------------------------------------------------------------------------------|
| PID_KIT_PATHWAY                          | 1.5<br>487<br>090<br>25 | 0.0473<br>65435 | SNAI2/GRAP2/SHC1/TEC/GRB10/VAV1/STAT5A/SH2B3/SOCS1/MAP4K1/SPRED2/STAT3/LYN/PTPN6/FOXO3/<br>KITLG/JAK2/SPRED1/CBL/STAT1/AKT1/CREBBP/PTEN/PIK3CA/BCL2/SOS1/DOK1/FER/GRB2        |
| KEGG_CHRONIC_MYELOID_LEUKEMIA            | 1.5<br>479<br>663<br>39 | 0.0198<br>64398 | CBLC/RUNX1/SHC1/TGFBR2/PIK3CG/TGFB2/PIK3CD/PIK3R5/TGFB1/STAT5A/CDKN1A/TGFB3/NFKB1/CDK6/<br>NFKBIA/SMAD3/MECOM/CDKN2A/TP53/CBL/ARAF/IKBKB/ABL1/AKT1/BRAF                       |
| ST_ADRENERGIC                            | 1.5<br>476<br>946<br>59 | 0.1207<br>06714 | CCL13/ITPR3/PTX3/CFB/PIK3CD/GNA15/CAMP/KCNJ5                                                                                                                                  |
| WP_15Q133_COPY_NUMBER_VARIATION_SYNDROME | 1.5<br>470<br>807<br>93 | 0.1349<br>1386  | GOLGA8K/GOLGA8O/SERPINH1/CCL5/GOLGA8H/ULK4P2/CHRNA7/CHRFAM7A/GPR75                                                                                                            |
| WP_CYTOSOLIC_DNASENSING_PATHWAY          | 1.5<br>465<br>082<br>27 | 0.0198<br>64398 | IL6/IL1B/CCL5/IKBKE/STING1/NFKB1/ZBP1/RIPK3/CXCL10/CASP8/RIPK1/CGAS/CASP1/CASP10/NFKBIA/AIM<br>2/NLRX1/DDX58/IFNA5/IFNA14/IRF7/MAVS/TRIM25/ADAR/IFNB1/IKBKB/CYLD/IFNA17/TRADD |
| WP_ANGIOGENESIS                          | 1.5<br>465<br>077<br>82 | 0.1230<br>74535 | MMP9/VEGFA/ARNT/FLT1/NOS3/HIF1A/SMAD1/ANGPT1/KDR/PLCG1/MAPK14/TIMP3/PDGFB/AKT1/CREBBP/<br>TIMP2/PIK3CA                                                                        |
| PID_IFNG_PATHWAY                         | 1.5<br>458<br>118<br>45 | 0.1071<br>85498 | IFNG/CEBPB/IL1B/SOCS1/IRF1/STAT3/PRKCD/CASP1/EP300/PTPN2/JAK2/CBL/CAMK2D/IRF9/STAT1/MAP3K<br>11/AKT1/CREBBP/PIK3CA/PIAS1/MTOR                                                 |
| REACTOME_MAPK3_ERK1_ACTIVATION           | 1.5<br>417<br>416<br>5  | 0.1460<br>87393 | IL6/IL6R/TYK2/JAK2                                                                                                                                                            |

|                                                  |                         |                 |                                                                                                                                                                                                    |
|--------------------------------------------------|-------------------------|-----------------|----------------------------------------------------------------------------------------------------------------------------------------------------------------------------------------------------|
| PID_P73PATHWAY                                   | 1.5<br>392<br>086<br>78 | 0.0198<br>64398 | SERPINE1/SERPINA1/IL4R/NTRK1/YAP1/PML/IL1RAP/CLCA2/GDF15/WT1/CDKN1A/SFN/PLK3/SP1/CASP2/CDK6/BCL2L1/FOXO3/EP300/FAS/TP63/MAPK14/AFP/GATA1/JAG2/ABL1/GRAMD4/BRCA2/CDK2/FLOT2                         |
| REACTOME_INTERLEUKIN_12_SIGNALING                | 1.5<br>383<br>468<br>17 | 0.0636<br>98474 | SOD2/SERPINB2/CNN2/LCP1/IFNG/IL10/IL12B/MSN/ANXA2/IL12RB1/P4HB/TYK2/JAK2/MTAP/GSTA2/CA1                                                                                                            |
| REACTOME_COMMON_PATHWAY_OF_FIBRIN_CLOT_FORMATION | 1.5<br>364<br>960<br>67 | 0.1442<br>84129 | F13A1/CD177/THBD/PF4V1/PROS1/FGG/F2R/PF4/PRTN3/PROCR/SERPINA5/SERPINC1                                                                                                                             |
| NABA_PROTEOGLYCANS                               | 1.5<br>350<br>233<br>05 | 0.1278<br>23508 | EPYC/KERA/LUM/PODNL1/HSPG2/BGN/ESM1/PRG4/HAPLN4/OGN/SPOCK2/ASPN/SRGN/HAPLN3/PRELP/FMOD/NYX                                                                                                         |
| WP_EDA_SIGNALLING_IN_HAIR_FOLLICLE_DEVELOPMENT   | 1.5<br>338<br>014<br>58 | 0.1259<br>11878 | DKK1/GLI1/LTB/RELB/BMP1                                                                                                                                                                            |
| REACTOME_TOLL_LIKE_RECEPTOR_TLR1_TLR2_CASCADE    | 1.5<br>327<br>024<br>26 | 0.0198<br>64398 | NOD2/TLR6/SAA1/TLR2/MAP3K8/NFKB2/CD14/TLR1/FOS/IRAK3/CD36/DUSP4/SOCS1/IRAK2/NFKB1/RPS6KA3/MYD88/JUN/NFKBIA/S100A12/LY96/DUSP6/MAP2K3/SFTPA1/TRAF6/MEF2A/DUSP3/TLR4/MAPKAPK2/MAPK14/TIRAP/IRAK1/BTK |
| WP_CANCER_IMMUNOTHERAPY_BY_CTLA4_BLOCKADE        | 1.5<br>313<br>191<br>66 | 0.1099<br>04832 | CTLA4/CD80/PIK3CD/CD28/HLA-DRB1/PTPN6/CD86                                                                                                                                                         |
| REACTOME_MET_ACTIVATES_RAS_SIGNALING             | 1.5<br>312<br>601<br>6  | 0.1526<br>07608 | MET/SHC1/HGF/RANBP10/RANBP9/SOS1/GRB2                                                                                                                                                              |

|                                                                        |                         |                 |                                                                                                                                                                                                                                                                                                                                                                                                    |
|------------------------------------------------------------------------|-------------------------|-----------------|----------------------------------------------------------------------------------------------------------------------------------------------------------------------------------------------------------------------------------------------------------------------------------------------------------------------------------------------------------------------------------------------------|
| REACTOME_ACTIVATION_OF_IRF3_IRF7_MEDIATED_BY_TBK1_IKK_EPSILON          | 1.5<br>310<br>126       | 0.1125<br>99394 | TICAM2/CD14/TICAM1/IKBKE/TRAF3/LY96/IRF7/TLR4                                                                                                                                                                                                                                                                                                                                                      |
| REACTOME_CELL_CELL_COMMUNICATION                                       | 1.5<br>297<br>461<br>15 | 0.0198<br>64398 | LAMA3/CLDN23/CLDN4/SIRPG/SDK1/ACTN1/ITGB4/LAMC2/CLDN19/IQGAP1/FBLIM1/CLDN1/KIRREL1/FLNA/FYB1/CDH17/KIRREL2/CLDN3/CDH11/ITGB1/CD2AP/JUP/NECTIN2/CLDN18/SIRPB1/PVR/CDH6/CDH2/ACTN4/LIMS1/CLDN7/PXN/F11R/CDH4/VASP/PTPN6/CDH5/KRT5/CLDN14/CLDN2/PLEC/NECTIN4/PARVA/CTNND1/LAMB3/CADM1/SFTPA1                                                                                                          |
| WP_PATHWAYS_OF_NUCLEIC_ACID_METABOLISM_AND_INNATE_IMMUNE_SENSING       | 1.5<br>295<br>827<br>83 | 0.1068<br>4863  | STING1/CGAS/SAMHD1/DDX58/IFIH1/OAS1/MAVS/RNASEL/RNASET2/ADAR/IFNB1                                                                                                                                                                                                                                                                                                                                 |
| REACTOME_REGULATION_OF_TNFR1_SIGNALING                                 | 1.5<br>294<br>304<br>2  | 0.1114<br>45536 | TNFAIP3/BIRC3/TRAF1/CASP8/RIPK1/TNFRSF1A/RNF31/OTUD7B/OTULIN/IKBKB/CYLD/TRADD/USP4/RBCK1/UBC/SPPL2A/TNF/TRAF2/XIAP/IKBKG/SPPL2B                                                                                                                                                                                                                                                                    |
| WP_INSULIN_SIGNALING                                                   | 1.5<br>285<br>567<br>05 | 0.0348<br>47442 | REG1A/CBLC/SHC1/SOCS3/EGR1/PIK3CG/MAPK13/MYO1C/GRB10/MAP3K8/MAP3K6/EHD2/PIK3CD/RAC2/FOS/SOCS1/ENPP1/PTPRF/MAP4K1/RHOJ/RRAD/IRS1/MAP3K14/STXB2/IRS2/RPS6KA3/FOXO1/MAPK4/PRKCD/SRF/JUN/ARF6/SLC2A1/MAP3K3/GYS1/MAP2K3/FOXO3/INPPL1/CYTH3/MAP3K12/MAP3K5/PFKL/MAPK14/INSR/IGF1R/CBL/PRKCH/MAP3K2/MAP3K11/RPS6KA4/IKBKB/PTPN1/MAP4K2/AKT1/PIK3C2A/RPS6KA1/PTEN/FLOT2/PRKAA1/INPP4A/PIK3CA/TBC1D4/MAPK7 |
| WP_LNCRNA_INVOLVEMENT_IN_CANONICAL_WNT_SIGNALING_AND_COLORECTAL_CANCER | 1.5<br>279<br>801<br>82 | 0.0198<br>64398 | ROR2/SFRP2/DKK1/SFRP4/FZD1/WNT3A/FZD7/FZD8/FOSL1/FZD5/ROR1/PLAU/LEF1/SERPINF1/SOST/SFRP5/MIR34AHG/JUN/FZD10/DKK2/CDK6/FZD2/NKD2/CER1/FZD6/ATF3                                                                                                                                                                                                                                                     |
| KEGG_GLYCOSAMINOGLYCAN_DEGRADATION                                     | 1.5<br>255<br>177<br>62 | 0.1392<br>33371 | HS3ST3B1/HPSE/HS3ST3A1/GUSB/GNS/HGSNAT/HEXB/GALNS/SGSH/ARSB/GLB1/IDUA/HEXA                                                                                                                                                                                                                                                                                                                         |
| PID_P38_ALPHA_BETA_PATHWAY                                             | 1.5<br>205<br>008<br>06 | 0.1188<br>19299 | LCK/DUSP1/BLK/HCK/RIPK1/LYN/MAP3K3/MAP2K3/FGR/CCM2/MAP3K12/TRAF6/MAPK14                                                                                                                                                                                                                                                                                                                            |



|                                                      |                         |                 |                                                                                                                                                                                                                                                    |
|------------------------------------------------------|-------------------------|-----------------|----------------------------------------------------------------------------------------------------------------------------------------------------------------------------------------------------------------------------------------------------|
| REACTOME_INTEGRIN_SIGNALING                          | 1.5<br>189<br>156<br>2  | 0.1296<br>17522 | FN1/SHC1/ITGB3/SYK/TLN1/FGG/VWF/RASGRP1/APBB1IP/ITGA2B/PTPN1/AKT1/RASGRP2                                                                                                                                                                          |
| PID_S1P_S1P3_PATHWAY                                 | 1.5<br>181<br>891<br>09 | 0.1076<br>28328 | ITGB3/GNA15/PDGFRB/VEGFA/GNA14/FLT1/S1PR3/JAK2/CXCR4/ITGAV/PDGFB/AKT1/S1PR2/GNA12/GNAI2/GNA13                                                                                                                                                      |
| WP_WNT_SIGNALING                                     | 1.5<br>158<br>507<br>14 | 0.0198<br>92136 | ROR2/SFRP2/DKK1/SFRP4/FZD1/WNT3A/FZD7/FZD8/FOSL1/GPC4/FZD5/NFATC4/ROR1/PLAU/LEF1/SERPINF1/PLCB2/NFATC2/SOST/SFRP5/JUN/FZD10/DKK2/FZD2/NFATC1/NKD2/DAAM1/VANGL1/ROCK2/NFATC3/CER1/PLCB3/PRICKLE2/FZD6                                               |
| BIOCARTA_GH_PATHWAY                                  | 1.5<br>120<br>228<br>34 | 0.1353<br>83273 | SHC1/PIK3CG/STAT5A/SOCS1/IRS1/SRF/PTPN6/PLCG1/JAK2/GHR/INSR/RPS6KA1/PIK3CA/SOS1/PRKCA/GRB2/STAT5B                                                                                                                                                  |
| KEGG_PROSTATE_CANCER                                 | 1.5<br>090<br>900<br>78 | 0.0198<br>64398 | INSRR/PIK3CG/ERBB2/FGFR1/PIK3CD/PIK3R5/CREB3L1/LEF1/EGF/PDGFRB/CREB3L2/CDKN1A/NKX3-1/NFKB1/FOXO1/PDGFD/NFKBIA/EP300/PDGFA/IGF1R/HSP90B1/TP53/TCF7/ARAF/IKKB/AR/PDGFB/CCNE1/AKT1/BRAF/CREBBP/CDK2/PTEN/IGF1/PIK3CA/BCL2/CREB5/SOS1/MTOR/PIK3CB/GRB2 |
| WP_RAC1PAK1P38MMP2_PATHWAY                           | 1.5<br>084<br>938<br>7  | 0.0414<br>10642 | GRB7/NOS2/FN1/TNIP3/DOK2/MAPK13/ERBB2/YAP1/ITGB1/STAT5A/NFKB1/STAT3/FOXO1/CASP7/PXN/NFKBIA/ANGPT1/ANGPT2                                                                                                                                           |
| WP_OVERVIEW_OF_INTERFERONSMEDIATED_SIGNALING_PATHWAY | 1.5<br>081<br>092<br>01 | 0.1269<br>36416 | IFNG/IFNE/STAT2/IFNLR1/IFNA5/IFNA14/TYK2/JAK2/IFNAR1/IL10RB/IRF9/STAT1/IFNB1/IFNA17/PIK3CA/IFNGR2/IFNL3/PRKCA                                                                                                                                      |
| REACTOME_IKK_COMPLEX_RECRUITMENT_MEDIATED_BY_RIP1    | 1.5<br>079<br>255<br>46 | 0.1456<br>35971 | BIRC3/TICAM2/CD14/TICAM1/RIPK3/RIPK1/LY96/TRAF6/TLR4                                                                                                                                                                                               |

|                                                   |                         |                 |                                                                                                                                                                                                                   |
|---------------------------------------------------|-------------------------|-----------------|-------------------------------------------------------------------------------------------------------------------------------------------------------------------------------------------------------------------|
| REACTOME_C_TYPE_LLECTIN_RECEPTORS_CLRS<br>-       | 1.5<br>066<br>420<br>8  | 0.0199<br>95966 | CD209/CLEC4D/CLEC10A/ITPR3/MUCL1/CLEC6A/CCL22/MUC3A/RELB/NFKB2/MUC1/IL1B/ICAM3/SYK/CLEC7A/NFATC2/PLCG2/MAP3K14/NFKB1/CASP8/PRKCD/CARD9/LYN/FCER1G/CARD11/ITPR2/MALT1/NFKBIA/NFATC1/NFATC3/EP300/PSME4/MUC13/TRAF6 |
| REACTOME_THE_NLRP3_INFLAMMASOME                   | 1.5<br>060<br>443<br>06 | 0.1286<br>89199 | MEFV/NFKB2/NLRP3/NFKB1/PSTPIP1/CASP1                                                                                                                                                                              |
| BIOCARTA_ERK5_PATHWAY                             | 1.5<br>060<br>035<br>95 | 0.1555<br>9401  | SHC1/NTRK1/PIK3CG/PLCG1/AKT1/RPS6KA1/PIK3CA/MAPK7/GRB2                                                                                                                                                            |
| BIOCARTA_FCER1_PATHWAY                            | 1.5<br>059<br>047<br>44 | 0.1183<br>64518 | SHC1/PIK3CG/NFATC4/FOS/VAV1/SYK/NFATC2/JUN/LYN/FCER1G/NFATC1/NFATC3/PLCG1                                                                                                                                         |
| BIOCARTA_TALL1_PATHWAY                            | 1.5<br>048<br>759<br>96 | 0.1286<br>89199 | TNFRSF17/MAP3K14/NFKB1/TNFSF13/TRAF3/TRAF6/MAPK14/TNFSF13B                                                                                                                                                        |
| REACTOME_TNFR1_INDUCED_PROAPOPTOTIC_S<br>IGNALING | 1.5<br>034<br>530<br>74 | 0.1555<br>9401  | TNFAIP3/CASP8/RIPK1/TNFRSF1A/OTUD7B/CYLD/TRADD/USP4/TNF/TRAF2/FADD                                                                                                                                                |
| WP_HEART_DEVELOPMENT                              | 1.5<br>021<br>995<br>52 | 0.0861<br>97387 | GATA6/BHLHE40/FGF10/FOXA2/NFATC4/TBX1/VEGFC/VEGFA/NFATC2/SRF/FOXC2/SMAD1/NFATC1/FOXC1/NFATC3/HAND1/FOXH1/TBX2                                                                                                     |
| BIOCARTA_FIBRINOLYSIS_PATHWAY                     | 1.4<br>984<br>430<br>01 | 0.1493<br>87755 | F13A1/SERPINE1/SERPINB2/PLAU/FGG/F2R                                                                                                                                                                              |

|                                                                         |                         |                 |                                                                                                                                                                                                                                                                                                                                                                                             |
|-------------------------------------------------------------------------|-------------------------|-----------------|---------------------------------------------------------------------------------------------------------------------------------------------------------------------------------------------------------------------------------------------------------------------------------------------------------------------------------------------------------------------------------------------|
| KEGG_REGULATION_OF_ACTIN_CYTOSKELETON                                   | 1.4<br>983<br>771<br>34 | 0.0247<br>96748 | BDKRB1/MYL10/ITGA2/BDKRB2/ITGA11/FN1/INSRR/ITGA4/ITGA3/ACTN1/ITGB4/FGF19/ITGAM/ITGA5/ITGB3/I<br>QGAP1/FGF10/MYH9/PIK3CG/ITGA10/ARPC1B/FGFR1/ITGB2/PIK3CD/CD14/VCL/NCKAP1L/PIK3R5/SCIN/RA<br>C2/ITGAD/VAV1/ITGB7/ITGAL/EGF/MYL7/ITGB1/ITGB5/PDGFRB/IQGAP2/MSN/MYL9/WAS/SLC9A1/VAV2/LIM<br>K1/ITGA1/SSH1/ACTN4/F2R/FGF11/PXN/ITGA7/FGF5/PDGFD/IQGAP3/WASF2/ITGAX/ROCK1/DIAPH2/ITGA9/<br>ROCK2 |
| BIOCARTA_PCAF_PATHWAY                                                   | 1.4<br>959<br>788<br>05 | 0.1601<br>80447 | IRF4/IRF1/NFKB1/JUN/IRF7/IRF5/IRF2/CREBBP                                                                                                                                                                                                                                                                                                                                                   |
| REACTOME_KERATAN_SULFATE_DEGRADATION                                    | 1.4<br>950<br>791<br>76 | 0.1601<br>80447 | KERA/LUM/OGN/GNS/HEXB/GALNS/PRELP/FMOD/GLB1/HEXA                                                                                                                                                                                                                                                                                                                                            |
| REACTOME_GRB2_SOS_PROVIDES_LINKAGE_TO<br>_MAPK_SIGNALING_FOR_INTEGRINS_ | 1.4<br>931<br>378<br>14 | 0.1342<br>1452  | FN1/ITGB3/TLN1/FGG/VWF/APBB1P/ITGA2B                                                                                                                                                                                                                                                                                                                                                        |
| REACTOME_NEPHRIN_FAMILY_INTERACTIONS                                    | 1.4<br>929<br>769<br>4  | 0.1558<br>93128 | ACTN1/IQGAP1/KIRREL1/KIRREL2/CD2AP/ACTN4                                                                                                                                                                                                                                                                                                                                                    |
| BIOCARTA_ACE2_PATHWAY                                                   | 1.4<br>921<br>715<br>15 | 0.1643<br>1522  | AGTR2/CMA1/COL4A1/COL4A2/AGTR1/ACE                                                                                                                                                                                                                                                                                                                                                          |
| PID_EPHA2_FWD_PATHWAY                                                   | 1.4<br>919<br>669<br>66 | 0.1406<br>85985 | SHC1/EPHA2/VAV2/INPPL1/CBL/VAV3/PIK3CA/TIAM1/GRB2                                                                                                                                                                                                                                                                                                                                           |
| KEGG_ALPHA_LINOLENIC_ACID_METABOLISM                                    | 1.4<br>887<br>149<br>49 | 0.1454<br>3258  | PLA2G2A/PLA2G2F/PLA2G4E/PLA2G5/PLA2G2D/JMJD7-PLA2G4B/PLA2G2C/PLA2G4B                                                                                                                                                                                                                                                                                                                        |

|                                                                |                         |                 |                                                                                                           |
|----------------------------------------------------------------|-------------------------|-----------------|-----------------------------------------------------------------------------------------------------------|
| BIOCARTA_PTEN_PATHWAY                                          | 1.4<br>869<br>370<br>21 | 0.1449<br>91932 | FASLG/SHC1/ITGB1/FOXO3/AKT1/PTEN/PIK3CA/SOS1/GRB2                                                         |
| WP_CELL_MIGRATION_AND_INVASION_THROUGH_P75NTR                  | 1.4<br>842<br>749<br>7  | 0.1423<br>98244 | MMP8/EFNB2/MMP9/EFNA5/CDH11/TWIST1/STAT3/JUN/ADAMTS13/TRIO/EFNA4/BDNF/AKT1/MMP2/EFNB1/PARD3/TIAM1         |
| BIOCARTA_EGF_PATHWAY                                           | 1.4<br>836<br>756<br>2  | 0.1353<br>83273 | SHC1/FOS/EGF/STAT5A/STAT3/SRF/JUN/PLCG1/RASA1/STAT1/PIK3CA/SOS1/PRKCA/GRB2                                |
| REACTOME_WNT5A_DEPENDENT_INTERNALIZATION_OF_FZD2_FZD5_AND_ROR2 | 1.4<br>826<br>348<br>98 | 0.1643<br>1522  | ROR2/FZD5/ROR1/FZD2                                                                                       |
| WP_MFAP5MEDIATED_OVARIAN_CANCER_CELL_MOTILITY_AND_INVASIVENESS | 1.4<br>822<br>269<br>51 | 0.1643<br>1522  | MFAP5/ITPR3/ITGB3/RYR3/JUN/PLCG1                                                                          |
| REACTOME_TRANSCRIPTIONAL_REGULATION_OF_PLURIPOTENT_STEM_CELLS  | 1.4<br>813<br>150<br>47 | 0.1209<br>86608 | GATA6/DKK1/EOMES/SALL4/DPPA4/EPHA1/EPAS1/STAT3/KLF4/FOXP1/POU5F1                                          |
| PID_ERBB_NETWORK_PATHWAY                                       | 1.4<br>813<br>057<br>33 | 0.1502<br>3078  | EREG/AREG/ERBB2/HBEGF/EGF/NRG1/BTC                                                                        |
| WP_UNFOLDED_PROTEIN_RESPONSE                                   | 1.4<br>785<br>821<br>56 | 0.1610<br>74003 | IL1B/ERN1/TNFRSF10B/CASP8/PPP1R15A/CASP2/HSPA5/BCL2L11/PMAIP1/TP53/NFE2L2/ATF6/EIF2AK3/BCL2/MBTPS2/MBTPS1 |

|                                                               |                         |                 |                                                                                                                                                                                                                                                                                                                                                                                                                                                |
|---------------------------------------------------------------|-------------------------|-----------------|------------------------------------------------------------------------------------------------------------------------------------------------------------------------------------------------------------------------------------------------------------------------------------------------------------------------------------------------------------------------------------------------------------------------------------------------|
| WP_EGFEGFR_SIGNALING_PATHWAY                                  | 1.4<br>768<br>773<br>41 | 0.0348<br>78607 | FOSB/CBLC/SH2D2A/SHC1/PXDN/ERRF11/IQGAP1/DOK2/ERBB2/RIN1/GRB10/FOS/VAV1/EGF/TWIST1/CAV1/STAT5A/PTPN12/MAP4K1/INPP5D/VAV2/ELK4/RPS6KA3/STAT3/FOXO1/MAPK4/PRKCD/JUN/RALBP1/SPRY2/PLSCR1/NOS3/ARF6/SP1/PLCE1/MAP3K3/ROCK1/INPPL1/PLCG1/JAK2/ARHGEF1/LIMK2/MEF2A/PIAS3/MAPK14/NCOA3/RASA1/CBL/PLD2/STAT1/MAP3K2/MEF2D/ABL1/ASAP1/AKT1/BRAF/NEDD4/PTK2B/RPS6KA1/PTEN/VAV3/MAPK7/RALB/SOS1/GJA1/AP2A1/MTOR/PRKCA/GRB2/IQSEC1/RPS6KA2/EPS8/STAT5B/HGS |
| PID_CIRCADIAN_PATHWAY                                         | 1.4<br>746<br>532<br>43 | 0.1548<br>5213  | BHLHE40/NPAS2/CLOCK/PER1/TIMELESS/NR1D1/ATR/PER2/ARNTL/CRY1                                                                                                                                                                                                                                                                                                                                                                                    |
| PID_ERBB4_PATHWAY                                             | 1.4<br>726<br>084<br>15 | 0.1265<br>61277 | EREG/PRLR/SHC1/ERBB2/YAP1/PIK3CD/HBEGF/STAT5A/NRG1                                                                                                                                                                                                                                                                                                                                                                                             |
| REACTOME_PLASMA_LIPOPROTEIN_ASSEMBLY_REMODELING_AND_CLEARANCE | 1.4<br>717<br>544<br>6  | 0.0613<br>40044 | LIPG/APOA2/PCSK5/ANGPTL4/APOB/LDLR/A2M/ABCA1/FURIN/BMP1/SOAT2/PLTP/APOBR/CES3/SOAT1/P4HB/LMF2/CIDEC/NPC2/LPL/CUBN/HDLBP/APOC4/NPC1/MTTP                                                                                                                                                                                                                                                                                                        |
| REACTOME_CONSTITUTIVE_SIGNALING_BY_OVEREXPRESSED_ERBB2        | 1.4<br>712<br>557<br>26 | 0.1966<br>67442 | SHC1/ERBB2/PTPN12/ERBIN                                                                                                                                                                                                                                                                                                                                                                                                                        |
| REACTOME_NICOTINATE_METABOLISM                                | 1.4<br>678<br>907<br>9  | 0.1328<br>9673  | PTGS2/NAMPT/PTGIS/NNMT/PARP14/PARP10/NT5E/PARP4                                                                                                                                                                                                                                                                                                                                                                                                |
| KEGG_TRYPTOPHAN_METABOLISM                                    | 1.4<br>663<br>668<br>12 | 0.1266<br>93507 | CYP1B1/IDO2/TDO2/TPH1/KYNU/IL4I1/ACMSD/MAOB/KMO/OGDH/WARS1/AOC1                                                                                                                                                                                                                                                                                                                                                                                |
| WP_1Q211_COPY_NUMBER_VARIATION_SYNDROME                       | 1.4<br>627<br>658<br>16 | 0.1328<br>9673  | KIRREL1/NOTCH2/GJA3/NOTCH2NLA/ACP6/F11R/GJA5/GJA8/BCL9/PRKAA1/OCLN/PRKAG3/PPIAL4H/GJA1/TJP1/AFDN/TJP3/PYGO1                                                                                                                                                                                                                                                                                                                                    |

|                                                           |                         |                 |                                                                                                                                                      |
|-----------------------------------------------------------|-------------------------|-----------------|------------------------------------------------------------------------------------------------------------------------------------------------------|
| BIOCARTA_INSULIN_PATHWAY                                  | 1.4<br>618<br>836<br>73 | 0.1595<br>91401 | SHC1/PIK3CG/FOS/IRS1/SRF/JUN/INSR/RASA1/PIK3CA/SOS1/GRB2                                                                                             |
| REACTOME_TRYPTOPHAN_CATABOLISM                            | 1.4<br>610<br>202<br>15 | 0.1954<br>65633 | IDO2/TDO2/KYNU/ACMSD/KMO                                                                                                                             |
| BIOCARTA_HER2_PATHWAY                                     | 1.4<br>596<br>148<br>89 | 0.1657<br>8686  | IL6/SHC1/PIK3CG/ERBB2/IL6R/ESR1/STAT3                                                                                                                |
| SIG_INSULIN_RECEPTOR_PATHWAY_IN_CARDIAC_MYOCYTES          | 1.4<br>595<br>121<br>63 | 0.0876<br>36414 | SHC1/PIK3CD/F2RL2/IRS1/IRS2/RPS6KA3/SFN/FOXO1/LNPEP/IGFBP1/INPPL1/CYTH3/BRD4/CDKN2A/CBL/PTPN1/AKT1/RPS6KA1/PTEN/FLOT2/PIK3CA/PARD3/SOS1/GRB2/RPS6KA2 |
| KEGG_ARRHYTHMOGENIC_RIGHT_VENTRICULAR_CARDIOMYOPATHY_ARVC | 1.4<br>590<br>938<br>39 | 0.0295<br>13566 | DSG2/ITGA2/LAMA2/ITGA11/ITGA4/ITGA3/ACTN1/ITGB4/DSC2/ITGA5/ITGB3/ITGA10/LEF1/ITGB7/ITGB1/ITGB5/JUP/LMNA/ITGA1/CACNA2D4/CDH2/ACTN4/ITGA7/SLC8A1/DMD   |
| WP_ARRHYTHMOGENIC_RIGHT_VENTRICULAR_CARDIOMYOPATHY        | 1.4<br>590<br>938<br>39 | 0.0295<br>13566 | DSG2/ITGA2/LAMA2/ITGA11/ITGA4/ITGA3/ACTN1/ITGB4/DSC2/ITGA5/ITGB3/ITGA10/LEF1/ITGB7/ITGB1/ITGB5/JUP/LMNA/ITGA1/CACNA2D4/CDH2/ACTN4/ITGA7/SLC8A1/DMD   |
| PID_RB_1PATHWAY                                           | 1.4<br>566<br>422<br>91 | 0.0694<br>96039 | CSF2/MET/RUNX2/TGFB2/CEBPB/CEBPD/CDKN1A/SPI1/JUN/CDK6/TAF1/EP300/MAPK14/CDKN2A/ATF7/ELF1/DNMT1/PPARG/ABL1/CCNE1/CREBBP/TFDP1/CDK2                    |
| BIOCARTA KERATINOCYTE_PATHWAY                             | 1.4<br>565<br>789<br>04 | 0.0938<br>73927 | FASLG/TNFRSF1B/MAPK13/FOS/EGF/MAP3K14/NFKB1/RIPK1/PRKCD/JUN/TNFRSF1A/SP1/NFKBIA/MAP2K3/MAP3K5/FAS/MAPK14                                             |

|                                                                                                     |                         |                 |                                                                        |
|-----------------------------------------------------------------------------------------------------|-------------------------|-----------------|------------------------------------------------------------------------|
| REACTOME_SEMA3A_PAK_DEPENDENT_AXON_R<br>EPULSION                                                    | 1.4<br>533<br>940<br>1  | 0.1642<br>87638 | NRP1/SEMA3A/FES/PLXNA1/LIMK1/PLXNA3                                    |
| REACTOME_TRAF6_MEDIATED_INDUCION_OF_T<br>AK1_COMPLEX_WITHIN_TLR4_COMPLEX                            | 1.4<br>531<br>930<br>18 | 0.1695<br>51273 | TICAM2/CD14/TICAM1/IRAK2/LY96/TRAF6/TLR4/TAB3/TAB2/MAP3K7/UBC          |
| WP_OSTEOBLAST_SIGNALING                                                                             | 1.4<br>527<br>158<br>18 | 0.1992<br>40272 | COL1A1/TNFSF11/IBSP/ITGB3/PDGFRB                                       |
| SA_TRKA_RECEPTOR                                                                                    | 1.4<br>522<br>087<br>06 | 0.1698<br>18469 | SHC1/NTRK1/PIK3CD/CDKN1A                                               |
| REACTOME_GENE_AND_PROTEIN_EXPRESSION_<br>BY_JAK_STAT_SIGNALING_AFTER_INTERLEUKIN_<br>12_STIMULATION | 1.4<br>507<br>083<br>8  | 0.1512<br>35621 | SOD2/SERPINB2/CNN2/LCP1/IFNG/IL10/MSN/ANXA2                            |
| BIOCARTA_TID_PATHWAY                                                                                | 1.4<br>496<br>048<br>72 | 0.1762<br>60908 | TNFRSF1B/IFNG/WT1/NFKB1/HSPA1A/TNFRSF1A/NFKBIA/JAK2/TP53/IKBKB         |
| BIOCARTA_BCR_PATHWAY                                                                                | 1.4<br>486<br>645<br>18 | 0.1298<br>55864 | SHC1/NFATC4/FOS/VAV1/SYK/NFATC2/JUN/LYN/NFATC1/NFATC3/PLCG1/MAPK14/BTK |
| KEGG_CIRCADIAN_RHYTHM_MAMMAL                                                                        | 1.4<br>452<br>417<br>89 | 0.1908<br>40103 | BHLHE40/NPAS2/CLOCK/PER1/BHLHE41/NR1D1/CSNK1D/PER2/ARNTL/CRY1          |

|                                                                 |                         |                 |                                                                                                                                                      |
|-----------------------------------------------------------------|-------------------------|-----------------|------------------------------------------------------------------------------------------------------------------------------------------------------|
| WP_ENDOCHONDRAL_OSSIFICATION                                    | 1.4<br>449<br>509<br>81 | 0.0783<br>39041 | MMP13/ADAMTS1/RUNX2/GLI3/TGFB2/FGFR1/SERPINH1/MMP9/COL10A1/SCIN/PLAU/TGFB1/ENPP1/VEGFA<br>/DDR2/RUNX3/ADAMTS4/SPP1/SOX9/GHR/IGF1R/TIMP3/STAT1/PRKACA |
| WP_ENDOCHONDRAL_OSSIFICATION_WITH_SKELETAL_DYSPLASIAS           | 1.4<br>449<br>509<br>81 | 0.0783<br>39041 | MMP13/ADAMTS1/RUNX2/GLI3/TGFB2/FGFR1/SERPINH1/MMP9/COL10A1/SCIN/PLAU/TGFB1/ENPP1/VEGFA<br>/DDR2/RUNX3/ADAMTS4/SPP1/SOX9/GHR/IGF1R/TIMP3/STAT1/PRKACA |
| REACTOME_KERATAN_SULFATE_BIOSYNTHESIS                           | 1.4<br>441<br>184<br>66 | 0.1581<br>87753 | KERA/LUM/B4GALT1/ST3GAL1/CHST2/OGN/B3GNT2/PRELP/FMOD/B3GNT3/B4GALT5                                                                                  |
| WP_MAPK_AND_NFKB_SIGNALLING_PATHWAYS_INHIBITED_BY_YERSINIA_YOPJ | 1.4<br>440<br>984<br>81 | 0.1587<br>80834 | MAP3K14/NFKB1/NFKBIA/TRAF6/RRAS/IKBKB                                                                                                                |
| BIOCARTA_VITCB_PATHWAY                                          | 1.4<br>428<br>372<br>54 | 0.2050<br>24346 | SLC2A3/COL4A1/COL4A2/P4HB/SLC2A1                                                                                                                     |
| PID_ARF6_PATHWAY                                                | 1.4<br>416<br>745<br>43 | 0.1583<br>75107 | MET/EPHA2/ITGB3/GNA15/EGF/AGTR1/GNA14/ARF6/PXN/ARAP2/HGF/ACAP1/CYTH3/ADRB2/ITGA2B                                                                    |
| WP_INTERACTOME_OF_POLYCOMB_REPRESSIVE_COMPLEX_2_PRC2            | 1.4<br>404<br>711<br>8  | 0.1908<br>40103 | STK38/ELL/SETX/AEBP2/THRAP3/MORC3/SUZ12/EZH2/BCLAF1/TRIM35/EZH1/JARID2                                                                               |
| REACTOME_DEFECTIVE_B4GALT7_CAUSES_EDS_PROGEROID_TYPE            | 1.4<br>377<br>778<br>72 | 0.1919<br>55193 | SDC1/HSPG2/BGN/GPC4/GPC1/GPC5/AGRN/SDC2/GPC6/VCAN/SDC4/DCN                                                                                           |



|                                                                          |                         |                 |                                                                                                                                                                                                                                                                                            |
|--------------------------------------------------------------------------|-------------------------|-----------------|--------------------------------------------------------------------------------------------------------------------------------------------------------------------------------------------------------------------------------------------------------------------------------------------|
| WP_MAPK_PATHWAY_IN_CONGENITAL_THYROID_CANCER                             | 1.4<br>377<br>165<br>18 | 0.1908<br>40103 | SHC1/ALK/FOS/JUN                                                                                                                                                                                                                                                                           |
| REACTOME_TP53_REGULATES_TRANSCRIPTION_OF_CASPASE_ACTIVATORS_AND_CASPASES | 1.4<br>373<br>670<br>34 | 0.1636<br>16328 | NLRC4/CASP1/CASP10/CASP2/PIDD1/TP63/TP53/ATM/CASP6                                                                                                                                                                                                                                         |
| WP_PROSTAGLANDIN_SYNTHESIS_AND_REGULATION                                | 1.4<br>301<br>814<br>2  | 0.1193<br>79767 | PTGS2/PTGER2/PTGFR/PTGES/PTGER4/PTGIS/PTGIR/PTGS1/ANXA2/PTGFRN/PPARGC1B/TBXA2R/EDNRA/TBXAS1/HSD11B1/ANXA1/SOX9/ANXA4                                                                                                                                                                       |
| REACTOME_NEGATIVE_REGULATORS_OF_DDX58_IFIH1_SIGNALING                    | 1.4<br>289<br>900<br>14 | 0.1454<br>3258  | TNFAIP3/NLRC5/IKBKE/RNF135/UBA7/TRAF3/NLRX1/DDX58/RNF216/IFIH1/MAVS/TRIM25/HERC5                                                                                                                                                                                                           |
| WP_EXTRACELLULAR_VESICLES_IN_THE_CROSSTALK_OF_CARDIAC_CELLS              | 1.4<br>272<br>282<br>22 | 0.1818<br>65285 | IL6/MMP9/EGF/STAT3/SPP1/HSPB1/KDR/TLR4/PTEN/IGF1/ETS2                                                                                                                                                                                                                                      |
| PID_ERBB1_RECEPTOR_PROXIMAL_PATHWAY                                      | 1.4<br>261<br>779<br>27 | 0.1640<br>08641 | SHC1/PIK3CD/EGF/TLN1/STAT3/PTPN6/PLCG1/RASA1/STAT1/PTPN1/GSN/PIK3CA/WASL/SOS1/PIK3CB/GRB2/PIP5K1C                                                                                                                                                                                          |
| REACTOME_TRANSCRIPTIONAL_REGULATION_OF_WHITE_ADIPOCYTE_DIFFERENTIATION   | 1.4<br>257<br>908       | 0.0320<br>55946 | LEP/PCK1/KLF5/ANGPTL4/EGR2/HELZ2/CEBPB/CEBPD/TGFB1/CD36/EBF1/NFKB1/KLF4/ZNF467/MED14/NR2F2/TBL1X/LPL/EP300/SREBF1/MED12/NCOA3/RXRA/MED23/NCOR2/WNT1/FABP4/PPARG/THRAP3/CREBBP/CARM1/NCOR1/MED15/PPARA/NCOA1/NCOA6/MED13/TNF/PPARGC1A/FAM120B/MED25/MED26/RELA/MED16/MED1/TGS1/ZNF638/MED22 |
| REACTOME_CELL_JUNCTION_ORGANIZATION                                      | 1.4<br>239<br>928<br>59 | 0.0321<br>19351 | LAMA3/CLDN23/CLDN4/SDK1/ACTN1/ITGB4/LAMC2/CLDN19/FBLIM1/CLDN1/FLNA/CDH17/CLDN3/CDH11/ITGB1/JUP/NECTIN2/CLDN18/PVR/CDH6/CDH2/LIMS1/CLDN7/PXN/F11R/CDH4/VASP/CDH5/KRT5/CLDN14/CLDN2/PLEC/NECTIN4/PARVA/CTNND1/LAMB3/CADM1                                                                    |

|                                           |                         |                 |                                                                                                                                     |
|-------------------------------------------|-------------------------|-----------------|-------------------------------------------------------------------------------------------------------------------------------------|
| REACTOME_SIGNALING_BY_ERBB2_ECD_MUTANTS   | 1.4<br>227<br>942<br>56 | 0.1908<br>40103 | SHC1/ERBB2/EGF/PLCG1/ERBIN/PIK3CA/SOS1/GRB2                                                                                         |
| REACTOME_RESOLUTION_OF_D_LOOP_STRUCTURES  | 1.4<br>218<br>196<br>42 | 0.1567<br>67906 | RTEL1/BRCA1/RMI2/TOP3A/BARD1/ATM/SPIDR/RBBP8/BRCA2/RAD50/XRCC2/WRN/RAD51D/EME2/BRIP1/BLM/SLX4/SLX1B/XRCC3                           |
| BIOCARTA_NPP1_PATHWAY                     | 1.4<br>214<br>094<br>75 | 0.2434<br>02018 | IBSP/COL4A1/COL4A2/ENPP1/SPP1                                                                                                       |
| REACTOME_SIGNALING_BY_EGFR                | 1.4<br>178<br>093<br>31 | 0.1152<br>3586  | EREG/ADAM12/SHC1/AREG/HBEGF/EGF/PTPN12/SPRY1/SPRY2/PXN/ADAM10/BTC/PLCG1                                                             |
| REACTOME_O_LINKED_GLYCOSYLATION_OF_MUCINS | 1.4<br>177<br>293<br>46 | 0.0855<br>01725 | GALNT5/GCNT1/GALNT4/MUCL1/MUC3A/B3GNT8/ST3GAL1/GALNT2/MUC1/GCNT7/ST6GALNAC2/GALNT12/B3GNT2/B3GNT5/A4GNT/CHST4/GALNT10/GALNT3/B3GNT9 |
| PID_WNT_CANONICAL_PATHWAY                 | 1.4<br>175<br>668<br>02 | 0.1966<br>67442 | WNT3A/FZD5/CAV1/CSNK1G1/NKD2                                                                                                        |
| REACTOME_COHESIN_LOADING_ONTO_CHROMATIN   | 1.4<br>169<br>599<br>96 | 0.2434<br>02018 | SMC1A/STAG1/WAPL/MAU2/NIPBL/PDS5B/PDS5A/SMC3                                                                                        |
| KEGG_HISTIDINE_METABOLISM                 | 1.4<br>167<br>738<br>66 | 0.1434<br>95238 | ALDH1A3/ALDH3B2/HAL/HDC/ALDH3A1/ALDH3B1/MAOB/AOC1                                                                                   |

|                                                                |                         |                 |                                                                                                                                                                                                                                                                                                                                              |
|----------------------------------------------------------------|-------------------------|-----------------|----------------------------------------------------------------------------------------------------------------------------------------------------------------------------------------------------------------------------------------------------------------------------------------------------------------------------------------------|
| REACTOME_BMAL1_CLOCK_NPAS2_ACTIVATES_CIRCADIAN_GENE_EXPRESSION | 1.4<br>162<br>896<br>25 | 0.1957<br>97468 | SERPINE1/NAMPT/BHLHE40/HELZ2/NPAS2/ARNTL2/NOCT/TBL1X/CLOCK/BHLHE41/RXRA/CREBBP/CARM1                                                                                                                                                                                                                                                         |
| REACTOME_SIGNALING_BY_TGFB_FAMILY_MEMBERS                      | 1.4<br>153<br>666<br>56 | 0.0437<br>69702 | SERPINE1/FST/INHBA/TGFBR2/CDKN2B/PMEP A1/ATP1B4/WWTR1/FURIN/JUNB/TGFB1/FSTL1/INHBB/PPP1R15A/SKI/SP1/F11R/FSTL3/ACVRL1/SMAD1/SMAD3/USP9X/CER1/ARHGEF18/FOXH1/AMHR2/SMURF1/CBL/NCOR2                                                                                                                                                           |
| REACTOME_TRAF6_MEDIATED_NF_KB_ACTIVATION                       | 1.4<br>153<br>002<br>26 | 0.2023<br>55866 | SAA1/NFKB2/NFKB1/RNF135/NFKBIA/S100A12/DDX58/IFIH1/MAVS/TRAF6/TRIM25/IKBKB/APP                                                                                                                                                                                                                                                               |
| REACTOME_ZBP1_DAI_MEDIATED_INDUCTION_OF_TYPE_I_IFNS            | 1.4<br>143<br>932<br>46 | 0.1818<br>65285 | NFKB2/TICAM1/NFKB1/ZBP1/RIPK3/MYD88/RIPK1/NFKBIA/TLR3                                                                                                                                                                                                                                                                                        |
| ST_FAS_SIGNALING_PATHWAY                                       | 1.4<br>117<br>757<br>42 | 0.0783<br>39041 | CXCL8/MET/CD7/NFKB2/IL1A/NFKB1/CASP8/RIPK1/RALBP1/CAD/CASP10/NFKBIA/ROCK1/NFAT5/HSPB1/CD46/MAP3K5/FAS/CASP8AP2/TP53/BTK                                                                                                                                                                                                                      |
| REACTOME_HS_GAG_DEGRADATION                                    | 1.4<br>107<br>194<br>67 | 0.1919<br>55193 | SDC1/HSPG2/GPC4/HPSE/GUSB/HGSNAT/GPC1/GPC5/SGSH/AGRN/SDC2/GPC6/SDC4/GLB1/IDUA                                                                                                                                                                                                                                                                |
| WP_ANGIOPOIETIN_LIKE_PROTEIN_8_REGULATORY_PATHWAY              | 1.4<br>082<br>065<br>9  | 0.0564<br>83493 | CBLC/PCK1/SHC1/PIK3CG/MAPK13/MAP3K8/MAP3K6/PIK3CD/CYP7A1/MAP4K1/IRS1/TRIP10/MAP3K14/IRS2/RPS6KA3/FOXO1/MAPK4/SLC2A1/FBP1/MAP3K3/GYS1/LPL/MAP2K3/FOXO3/SREBF1/MAP3K12/MAP3K5/MAPK14/INSR/RXRA/CBL/MAP3K2/MAP3K11/RPS6KA4/PTPN1/MAP4K2/SLC16A2/AKT1/PIK3C2A/RPS6KA1/FLOT2/PRKAA1/PIK3CA/MAPK7/NR1H3/SESN3/PRKAG3/MAP3K7/SOS1/MLXIPL/MTOR/RPTOR |
| PID_RHOA_REG_PATHWAY                                           | 1.4<br>080<br>231<br>35 | 0.1392<br>7804  | PLEKHG6/DLC1/VAV1/ARHGAP4/ARHGAP9/DEF6/ARHGAP6/AKAP13/VAV2/ARHGEF5/ARAP1/MYO9B/ARHGEF1/TRIO/ARHGEF18/ARHGEF28/ARHGEF15/ARHGEF12/ARHGEF10/ARHGDIB/ARHGAP8/ARAP3/FARP1/VAV3/SRGAP1                                                                                                                                                             |

|                                                                     |                         |                 |                                                                                                                                                                    |
|---------------------------------------------------------------------|-------------------------|-----------------|--------------------------------------------------------------------------------------------------------------------------------------------------------------------|
| REACTOME_TNF_SIGNALING                                              | 1.4<br>063<br>156<br>32 | 0.1426<br>13549 | TNFAIP3/BIRC3/TRAF1/CASP8/RIPK1/TNFRSF1A/RNF31/ADAM17/OTUD7B/OTULIN/TAB3/IKBKB/NSMAF/CYLD/TRADD/TAB2/MAP3K7/USP4/RBCK1/UBC/SPPL2A/TNF/TRAF2/XIAP/FADD/IKBKG/SPPL2B |
| REACTOME_TIGHT_JUNCTION_INTERACTIONS                                | 1.4<br>062<br>234<br>09 | 0.1595<br>91401 | CLDN23/CLDN4/CLDN19/CLDN1/CLDN3/CLDN18/CLDN7/F11R/CLDN14/CLDN2                                                                                                     |
| WP_WNTBETACATENIN_SIGNALING_PATHWAY_IN_LEUKEMIA                     | 1.4<br>059<br>962<br>26 | 0.2005<br>49854 | DKK1/SALL4/FLT3/PML/LEF1/JUP/PPARD/FZD6/WNT1/LRP5/BCL9/AKT1/RUNX1T1                                                                                                |
| KEGG_EPITHELIAL_CELL_SIGNALING_IN_HELICOBACTER_PYLORI_INFECTION     | 1.4<br>057<br>559       | 0.0799<br>96349 | CXCR1/CXCL8/CXCL1/MET/TCIRG1/MAPK13/CXCR2/CCL5/HBEGF/PLCG2/MAP3K14/NFKB1/JUN/LYN/F11R/NFKBIA/ADAM10                                                                |
| REACTOME_TRANSCRIPTIONAL_REGULATION_BY_RUNX3                        | 1.4<br>051<br>683<br>02 | 0.0542<br>94615 | RUNX1/ITGA4/YAP1/WWTR1/TEAD3/CCN2/LEF1/ITGAL/TGFB1/ZFH3/CDKN1A/RUNX3/RORC/SMAD3/SPP1/BCL2L11/FOXO3/EP300/TEAD1/JAG1/MAML1/CDKN2A/MAML3/TEAD4/SMURF1/TP53/TCF7      |
| WP_APOPTOSIS_MODULATION_BY_HSP70                                    | 1.4<br>050<br>537<br>96 | 0.2095<br>05802 | FASLG/NFKB1/CASP8/HSPA1A/CASP7/RIPK1/TNFRSF1A/CASP2/FAS                                                                                                            |
| REACTOME_ALPHA_LINOLENIC_OMEGA3_AND_LINOLEIC_OMEGA6_ACID_METABOLISM | 1.4<br>030<br>517<br>74 | 0.2353<br>99597 | ELOVL2/ELOVL3/ACSL1/ABCD1                                                                                                                                          |
| BIOCARTA_SET_PATHWAY                                                | 1.4<br>017<br>995<br>92 | 0.2478<br>97597 | PRF1/GZMA/GZMB                                                                                                                                                     |
| PID_IL8_CXCR2_PATHWAY                                               | 1.4<br>015              | 0.1752<br>02044 | CXCL8/PIK3R6/PIK3CG/CXCR2/DOCK2/GNA15/RAC2/PLCB2/HCK/GNA14/LYN/VASP/PLCB3/FGR                                                                                      |

|                                                          |                         |                 |                                                                                                                                 |
|----------------------------------------------------------|-------------------------|-----------------|---------------------------------------------------------------------------------------------------------------------------------|
|                                                          | 988<br>02               |                 |                                                                                                                                 |
| PID_IL5_PATHWAY                                          | 1.4<br>004<br>680<br>58 | 0.2478<br>97597 | CSF2RB/CISH/PIM1/STAT5A/LYN/JAK2/SDCBP/PIK3CA/GRB2/STAT5B                                                                       |
| WP_PRION_DISEASE_PATHWAY                                 | 1.3<br>987<br>239       | 0.1773<br>63836 | FGFR1/BATF/IRF4/EBF1/NFKB1/PDIA3/STAT3/SPI1/HSPA5/POU2F2/EP300/HSP90B1/RXRA/CHD2                                                |
| REACTOME_SIGNALING_BY_ACTIVIN                            | 1.3<br>983<br>267<br>4  | 0.2397<br>69632 | FST/INHBA/INHBB/FSTL3/SMAD3/FOXH1                                                                                               |
| WP_HEDGEHOG_SIGNALING_PATHWAY                            | 1.3<br>973<br>853<br>78 | 0.1426<br>13549 | EVC2/EVC/GLI1/GLI3/GLI2/BOC/DHH/CSNK1G1/SMO/SMURF1/PTCH2/CDON/CSNK1G2/GRK2/PRKACA/SHH/<br>KIF7/CSNK1D/BCL2                      |
| REACTOME_DEFECTIVE_EXT2_CAUSES_EXOSTOSES_2               | 1.3<br>958<br>645<br>88 | 0.2611<br>35504 | SDC1/HSPG2/GPC4/GPC1/GPC5/AGRN/SDC2/GPC6/SDC4/EXT1/EXT2                                                                         |
| PID_LYSOPHOSPHOLIPID_PATHWAY                             | 1.3<br>954<br>139<br>73 | 0.1007<br>37642 | IL6/CXCL8/ADCY7/GNA15/MMP9/FOS/HBEGF/NFKB1/ADCY3/TRIP6/PRKCD/JUN/GNA14/LYN/PXN/NFKBIA/A<br>DCY4/ADCY6/PLCG1/PLCB3/ADCY9/ARHGEF1 |
| REACTOME_ERBB2_ACTIVATES_PTK6_SIGNALING                  | 1.3<br>936<br>913<br>2  | 0.2397<br>69632 | EREG/ERBB2/HBEGF/EGF/NRG1/BTC                                                                                                   |
| REACTOME_FOXO_MEDIATED_TRANSCRIPTION_OF_CELL_DEATH_GENES | 1.3<br>929<br>676<br>43 | 0.2319<br>9704  | FASLG/FOXO1/CITED2/BCL6/BCL2L11/FOXO3/EP300                                                                                     |

|                                                          |                         |                 |                                                                                                                                                                                          |
|----------------------------------------------------------|-------------------------|-----------------|------------------------------------------------------------------------------------------------------------------------------------------------------------------------------------------|
| BIOCARTA_CCR5_PATHWAY                                    | 1.3<br>927<br>233<br>92 | 0.2415<br>16862 | CCL2/CCR5/CXCL12/FOS/JUN/PLCG1/MAPK14/CXCR4                                                                                                                                              |
| WP_PHOTODYNAMIC_THERAPYINDUCED_UNFOLDED_PROTEIN_RESPONSE | 1.3<br>919<br>446<br>53 | 0.2005<br>49854 | SULT1E1/ERN1/EDEM1/DNAJC3/PPP1R15A/WARS1/HSPA5/BCL2L11/PDIA6/ATF3/HSP90B1/CALR/NFE2L2/ATF6/EIF2AK3                                                                                       |
| REACTOME_SIGNALING_BY_TGF_BETA_RECEPTOR_COMPLEX          | 1.3<br>905<br>489<br>74 | 0.0792<br>09475 | SERPINE1/TGFBR2/CDKN2B/PMEPA1/ATP1B4/WWTR1/FURIN/JUNB/TGFB1/PPP1R15A/SKI/SP1/F11R/SMAD3/USP9X/ARHGEF18/SMURF1/CBL/NCOR2/CCNK/CCNT1/TFDP1/NCOR1/RNF111/PARD3/TGFBR1/UBC/SMURF2/TGIF1/RBL1 |
| REACTOME_PLASMA_LIPOPROTEIN_ASSEMBLY                     | 1.3<br>871<br>595<br>83 | 0.2193<br>89212 | APOA2/APOB/A2M/ABCA1/BMP1/P4HB/APOC4/MITF                                                                                                                                                |
| REACTOME_APOPTOTIC_CLEAVAGE_OF_CELLULAR_PROTEINS         | 1.3<br>853<br>711<br>79 | 0.2080<br>6869  | DSG2/LMNA/CASP8/CASP7/PRKCD/VIM/ROCK1/STK26/PLEC/STK24/DSG3/CLSPN/ACIN1/DBNL/CASP6/GSN/OCLN/GAS2/TJP1/CASP3                                                                              |
| REACTOME_EICOSANOID_LIGAND_BINDING_RECEPTORS             | 1.3<br>849<br>619<br>46 | 0.2594<br>89529 | PTGER2/PTGFR/PTGER4/PTGIR/LTB4R2/LTB4R/OXER1/TBXA2R                                                                                                                                      |
| WP_HEAD_AND_NECK_SQUAMOUS_CELL_CARCINOMA                 | 1.3<br>806<br>234<br>27 | 0.0943<br>86035 | TGFBR2/PIK3CG/ERBB2/FGFR1/NFKB2/REL/PIK3R5/NOTCH2/VEGFA/AJUBA/FAT1/CDKN1A/NFKB1/CASP8/IRF6/CDK6/TRAF3/NUMB/TERT/TP63/MAML1/CDKN2A/IGF1R/TP53                                             |
| REACTOME_NGF_STIMULATED_TRANSCRIPTION                    | 1.3<br>806<br>066<br>62 | 0.2051<br>28891 | FOSB/EGR1/FOSL1/EGR2/TPH1/EGR3/JUNB/FOS/F3/RRAD/TRIB1/SRF/REST                                                                                                                           |

|                                                                          |                         |                 |                                                                                                                                                                                                                                   |
|--------------------------------------------------------------------------|-------------------------|-----------------|-----------------------------------------------------------------------------------------------------------------------------------------------------------------------------------------------------------------------------------|
| KEGG_PANCREATIC_CANCER                                                   | 1.3<br>797<br>815<br>53 | 0.0876<br>36414 | TGFBR2/PIK3CG/ERBB2/TGFB2/PIK3CD/VEGFC/PIK3R5/RAC2/TGFB1/EGF/VEGFA/TGFB3/NFKB1/STAT3/RALB/CDK6/SMAD3/CDKN2A/TP53/ARAF/ARHGEF6/STAT1/IKBKB/AKT1/BRAF/BRCA2/PIK3CA/RALB/TGFB1                                                       |
| REACTOME_REGULATION_OF_KIT_SIGNALING                                     | 1.3<br>793<br>465<br>33 | 0.2413<br>39978 | LCK/SH2B3/SOCS1/LYN/PTPN6/KITLG/CBL/SOS1/PRKCA/GRB2/SOCS6                                                                                                                                                                         |
| REACTOME_NUCLEAR_EVENTS_KINASE_AND_TRANSCRIPTION_FACTOR_ACTIVATION_      | 1.3<br>792<br>720<br>9  | 0.1052<br>76074 | FOSB/EGR1/FOSL1/EGR2/TPH1/EGR3/JUNB/FOS/DUSP4/F3/RRAD/RPS6KA3/TRIB1/SRF/REST/DUSP6/EP300/MEF2A/DUSP3/MAPKAPK2/MAPK14/EGR4                                                                                                         |
| WP_DNA_IRDAMAGE_AND_CELLULAR_RESPONSE_VIA_ATR                            | 1.3<br>784<br>081<br>81 | 0.0730<br>64363 | PML/SP1/RECQL/BCL6/CEP164/HUS1/SMC1A/BRCA1/TP53BP1/RFWD3/UPF1/CLSPN/TP53/TOP3A/PRKDC/BARD1/ATM/RBBP8/FANCA/CLK2/BRCA2/RAD50/MDC1/CDK2/ATR/BRCC3/WRN/RECQL5/HERC2/SMARCAL1/RAD9A/BRIP1/MCM2/FEN1/FOXM1/ATRIP/IKBKG/USP1/RAD52/RPA1 |
| WP_SIMPLIFIED_INTERACTION_MAP_BETWEEN_LOXL4_AND_OXIDATIVE_STRESS_PATHWAY | 1.3<br>782<br>598<br>72 | 0.2556<br>16551 | LOXL4/FN1/TGFB1/PKD1/FGF7/NFE2L2                                                                                                                                                                                                  |
| WP_NEUROINFLAMMATION                                                     | 1.3<br>771<br>155<br>19 | 0.2628<br>37088 | NOS2/FOS/JUN/NFKBIA/TLR4/MAPK14                                                                                                                                                                                                   |
| REACTOME_REGULATION_OF_GLYCOKINASE_BY_GLYCOKINASE_REGULATORY_PROTEIN     | 1.3<br>762<br>718<br>34 | 0.1843<br>19461 | NUP210/GCKR/POM121/POM121C/NUP98/TPR/NUP188/NUP205/NUP62/NUP153/NUP214/RANBP2/NUP155/NUP50/NUP160/NUP58                                                                                                                           |
| BIOCARTA_STRESS_PATHWAY                                                  | 1.3<br>758<br>697<br>77 | 0.2224<br>83187 | MAP3K14/NFKB1/RIPK1/JUN/TNFRSF1A/CASP2/NFKBIA/MAP2K3/MAPK14/IKBKB/MAP4K2/TRADD                                                                                                                                                    |

|                                          |                         |                 |                                                                                                                                                                                                                                                                                                                                                                                                                                                                                |
|------------------------------------------|-------------------------|-----------------|--------------------------------------------------------------------------------------------------------------------------------------------------------------------------------------------------------------------------------------------------------------------------------------------------------------------------------------------------------------------------------------------------------------------------------------------------------------------------------|
| REACTOME_SIGNAL_TRANSDUCTION_BY_L1       | 1.3<br>757<br>214<br>31 | 0.2008<br>97308 | NRP1/ITGA5/ITGB3/FGFR1/ITGB1/VAV2                                                                                                                                                                                                                                                                                                                                                                                                                                              |
| WP_HIPPOMERLIN_SIGNALING_DYSREGULATION   | 1.3<br>754<br>189<br>63 | 0.0557<br>91636 | ITGA2/MET/ITGA11/ITGA4/ITGA3/EPHA2/ITGB4/ITGAM/ITGA5/ITGB3/LATS2/NTRK1/CD44/ITGA10/FGFR1/ITGB2/CDH17/FLT3/TEAD3/ITGAD/CCN2/CSF1R/CDH11/ITGB7/ITGAL/ITGB1/ITGB5/PDGFRB/FLT4/AJUBA/ITGA1/CDH6/CDH2/CXCL10/FLT1/ITGA7/CDH4/CDH5/ITGAX                                                                                                                                                                                                                                             |
| REACTOME_G_ALPHA_I_SIGNALLING_EVENTS     | 1.3<br>753<br>985<br>59 | 0.0406<br>05585 | CCL13/CCL20/CXCL13/CXCL5/CCR8/GNGT1/HCAR3/BDKRB1/FPR2/HCAR2/CCR2/CCR4/CXCR3/PPBP/CXCR1/CXCL8/CXCL3/STRA6/CCL23/CXCL1/ITPR3/SDC1/BDKRB2/MTNR1B/CXCL2/FPR3/APOA2/AGTR2/HSPG2/C5AR1/RDH10/CXCR5/NPY2R/CCR7/CCR5/CCR6/CXCL6/CXCL9/CCR1/LRP1/HTR1D/APOB/LDLR/GPC4/C3/GPR18/SAA1/P2RY4/TAS2R60/CCR3/ADCY7/CXCR2/GPR31/CXCR6/S1PR4/TAS2R40/CXCL12/PLB1/CCL5/FPR1/CASR/MYO7A/C3AR1/AKR1B10/PLCB2/GPR183/LRP10/C5/CNR2/PYY/SLC24A1/SUCNR1/CNR1/PDE1C/OXER1/RCVRN/OPN3/CXCL10/ADCY3/LRAT |
| WP_CARDIAC_HYPERTROPHIC_RESPONSE         | 1.3<br>733<br>799<br>18 | 0.1114<br>45536 | PLA2G2A/PRKG1/TGFB1/EGF/IKBKE/NFATC2/MAP4K1/HDAC7/MAP3K14/NRG1/NFKB1/TNFRSF1A/MAP2K3/MEF2A/MAPK14/CAMK2D/IKBKB/AKT1/IGF1/MAPK7/TGFBR1/MAP3K7/MTOR/PRKCA                                                                                                                                                                                                                                                                                                                        |
| REACTOME_NOTCH_HLH_TRANSCRIPTION_PATHWAY | 1.3<br>728<br>636<br>89 | 0.2108<br>60443 | NOTCH3/NOTCH2/HDAC7/TBL1X/MAML1/MAML3/NCOR2/HDAC10/CREBBP/NCOR1/HDAC6/NOTCH4                                                                                                                                                                                                                                                                                                                                                                                                   |
| WP_ENDODERM_DIFFERENTIATION              | 1.3<br>727<br>789<br>47 | 0.0580<br>80346 | GATA6/DKK1/FOXA1/EOMES/LAMC1/DAB2/RAB38/GLI2/ZIC5/FOXA2/LEF1/TGFB1/DUSP4/DUSP5/ATP8B2/RARG/ELK4/FOXO1/TRIM5/AHDC1/ZFH4/PLCH1/SMAD3/POU5F1/MAP2K3/HOXA1/CER1/WDHD1/ASCC3/CTR9/EXT1/FOXN3/FOXH1/NCAPG2/BCORL1/CEP250/TCF7/DUSP2/SLC2A12/UBR5/STAT1/AEBP2                                                                                                                                                                                                                         |
| REACTOME_RUNX3_REGULATES_P14_ARF         | 1.3<br>726<br>801<br>9  | 0.2786<br>34173 | RUNX1/TGFB1/RUNX3/EP300/CDKN2A                                                                                                                                                                                                                                                                                                                                                                                                                                                 |
| ST_GA12_PATHWAY                          | 1.3<br>723              | 0.2380<br>42826 | CFB/F2RL1/TEC/F2RL3/VAV1/F2RL2/JUN                                                                                                                                                                                                                                                                                                                                                                                                                                             |



|                                                                              |                         |                 |                                                                                                                                                                                                                                                                       |
|------------------------------------------------------------------------------|-------------------------|-----------------|-----------------------------------------------------------------------------------------------------------------------------------------------------------------------------------------------------------------------------------------------------------------------|
|                                                                              | 462<br>84               |                 |                                                                                                                                                                                                                                                                       |
| KEGG_NEUROTROPHIN_SIGNALING_PATHWAY                                          | 1.3<br>711<br>151<br>72 | 0.0661<br>76716 | NTF3/FASLG/SHC1/NTRK1/PIK3CG/MAPK13/CALML6/PIK3CD/PIK3R5/IRAK3/SH2B3/PLCG2/IRS1/IRAK2/NFKB1/IRS2/RPS6KA3/PRKCD/JUN/NFKBIA/MAP3K3/FOXO3/PLCG1/TRAF6/MAP3K5/SORT1/MAPKAPK2/MAPK14/BDNF/IRAK1/TP53/CAMK2D/RPS6KA4/IKBKB/ABL1/ARHGDIB/AKT1/BRAF/RPS6KA1/PIK3CA/MAPK7/BCL2 |
| REACTOME_ACTIVATION_OF_SMO                                                   | 1.3<br>699<br>446<br>32 | 0.2713<br>45012 | EVC2/EVC/BOC/DHH/SMO/IQCE/CDON/GRK2/SHH                                                                                                                                                                                                                               |
| REACTOME_ENDOSOMAL_VACUOLAR_PATHWAY                                          | 1.3<br>698<br>484<br>95 | 0.2669<br>05921 | CTSS/CTSL/HLA-C/HLA-B/LNPEP/HLA-F/HLA-E/HLA-G                                                                                                                                                                                                                         |
| REACTOME_GAMMA_CARBOXYLATION_HYPUSINE_FORMATION_AND_ARYLSULFATASE_ACTIVATION | 1.3<br>697<br>093<br>08 | 0.1791<br>2302  | ARSI/ARSJ/FURIN/PROS1/GAS6/ARSD/STS/ARSF/ARSG/ARSB/ICMT/SUMF1/ARSL/ARSA/GGCX                                                                                                                                                                                          |
| BIOCARTA_HSP27_PATHWAY                                                       | 1.3<br>690<br>241<br>32 | 0.2814<br>88179 | FASLG/IL1A/HSPB1/FAS/MAPKAPK2/ACTA1/BCL2/CASP3/TNF/MAPKAPK3/APAF1                                                                                                                                                                                                     |
| REACTOME_CD28_CO_STIMULATION                                                 | 1.3<br>686<br>221<br>75 | 0.1992<br>40272 | GRAP2/LCK/MAP3K8/CD80/CD28/VAV1/MAP3K14/LYN/PRR5/CD86                                                                                                                                                                                                                 |
| REACTOME_ERBB2_REGULATES_CELL_MOTILITY                                       | 1.3<br>680<br>255<br>46 | 0.2713<br>45012 | EREG/ERBB2/HBEGF/EGF/NRG1/BTC                                                                                                                                                                                                                                         |
| WP_ANDROGEN_RECEPTOR_SIGNALING_PATHWAY                                       | 1.3<br>676              | 0.0659<br>54722 | RUNX2/FHL2/FLNA/CAV1/CDKN1A/STAT3/FOXO1/JUN/BMF/SP1/ROCK1/SMAD3/TGFB111/ROCK2/ETV5/EP300/SIN3A/LIMK2/PIAS3/BRCA1/EFCAB6/NCOA3/NCOR2/CALR/AR/CCNE1/AKT1/RNF6/ZNF318/CREBBP/CARM1/PTEN/UBE3A/NCOR1/PIAS1/PSMC3IP/NCOA1/NR2C2/RAD9A/TGIF1                                |

|                                                                                                  |                         |                 |                                                                                                                                |
|--------------------------------------------------------------------------------------------------|-------------------------|-----------------|--------------------------------------------------------------------------------------------------------------------------------|
|                                                                                                  | 466<br>04               |                 |                                                                                                                                |
| WP_TYPE_2_PAPILLARY_RENAL_CELL_CARCINOMA                                                         | 1.3<br>667<br>109<br>69 | 0.1980<br>23862 | COL21A1/TGFB2/TGFB1/VEGFA/EPAS1/CTSK/CDKN1A/TGFB3/ARNT/HIF1A/SLC2A1/EP300/DIAPH1/TFE3/PDGFB/CREBBP                             |
| REACTOME_PI3K_EVENTS_IN_ERBB2_SIGNALING                                                          | 1.3<br>664<br>441<br>91 | 0.2747<br>30216 | EREG/ERBB2/HBEGF/EGF/NRG1/BTC                                                                                                  |
| REACTOME_PEPTIDE_HORMONE_METABOLISM                                                              | 1.3<br>660<br>547<br>18 | 0.0659<br>54722 | MME/LEP/ANPEP/GCG/GIP/CTSG/INHBA/CTS2/DPP4/RAB27A/CMA1/CES1/INHBE/PCSK1/ERO1A/ACE/INHB/GZMH/KLF4/ENPEP/SLC30A7/CGB5/CTSD/FFAR4 |
| REACTOME_A_TETRASACCHARIDE_LINKER_SEQUENCE_IS_REQUIRED_FOR_GAG_SYNTHESIS                         | 1.3<br>647<br>505<br>05 | 0.2005<br>49854 | SDC1/HSPG2/BGN/GPC4/GPC1/GPC5/XYL2/AGRN/SDC2/GPC6/VCAN/SDC4/DCN                                                                |
| WP_NUCLEAR_RECEPTORS                                                                             | 1.3<br>620<br>860<br>83 | 0.2193<br>89212 | VDR/NR2E1/ROR1/NR4A1/NR1I2/ESR1/ESR2/NR4A2/RARG/RORC/RORA/PPARD/ESRRB/NR2F2                                                    |
| REACTOME_RESPONSE_OF_MTB_TO_PHAGOCYTOSIS                                                         | 1.3<br>603<br>364<br>5  | 0.2420<br>06667 | NOS2/CTSG/RNF213                                                                                                               |
| PID_HEDGEHOG_2PATHWAY                                                                            | 1.3<br>585<br>247<br>08 | 0.2260<br>86957 | GLI2/TGFB2/HHAT/BOC/DHH/SMO/PTCH2/CDON/GRK2/SHH/AKT1/PIK3CA                                                                    |
| WP_MFAP5_EFFECT_ON_PERMEABILITY_AND_MOTILITY_OF_ENDOTHELIAL_CELLS_VIA_CYTOSKELETON_REARRANGEMENT | 1.3<br>577              | 0.2776<br>61064 | MFAP5/ACTN1/ITGB3/VCL/LPP/JUN/PXN/PLCG1                                                                                        |

|                                                                 |                         |                 |                                                                                                                          |
|-----------------------------------------------------------------|-------------------------|-----------------|--------------------------------------------------------------------------------------------------------------------------|
|                                                                 | 504<br>6                |                 |                                                                                                                          |
| WP_NANOPARTICLE_TRIGGERED_REGULATED_NECROSIS                    | 1.3<br>577<br>351<br>53 | 0.2578<br>34938 | TICAM1/RIPK3/CASP8/RIPK1/TNFRSF1A                                                                                        |
| REACTOME_SIGNALING_BY_ERBB2                                     | 1.3<br>575<br>264<br>43 | 0.1535<br>36005 | EREG/GRB7/SHC1/ERBB2/HBEGF/EGF/PTPN12/NRG1/PRKCD/BTC/PTPN18/PLCG1/ERBIN/DIAPH1                                           |
| WP_CONTROL_OF_IMMUNE_TOLERANCE_BY_VASOACTIVE_INTESTINAL_PEPTIDE | 1.3<br>574<br>683<br>71 | 0.2687<br>76371 | CTLA4/IFNG/IL10/CD80/CD28/TGFB1/CD86/FAS                                                                                 |
| PID_ECADHERIN_STABILIZATION_PATHWAY                             | 1.3<br>562<br>157<br>41 | 0.2193<br>605   | MET/ACTN1/EPHA2/VCL/EGF/ZYX/NECTIN2/PLEKHA7/LPP/ARF6/VASP/ROCK1/HGF/AQP3/CTNND1/DIAPH1/IGF1R/CTNNA1                      |
| REACTOME_BUTYROPHILIN_BTN_FAMILY_INTERACTIONS                   | 1.3<br>545<br>767<br>19 | 0.2617<br>70736 | CD209/XDH/PPL                                                                                                            |
| REACTOME_MET_ACTIVATES_RAP1_AND_RAC1                            | 1.3<br>530<br>617<br>37 | 0.2864<br>49472 | MET/HGF/DOCK7/GRB2/RAPGEF1/RAP1B                                                                                         |
| REACTOME_EXTRA_NUCLEAR_ESTROGEN_SIGNALING                       | 1.3<br>522<br>342<br>23 | 0.0943<br>6981  | EREG/GNGT1/MMP7/SHC1/AREG/MMP9/FOS/ESR1/ESR2/MMP3/HBEGF/EGF/CAV1/SRF/NOS3/S1PR3/BTC/FOXO3/HSPB1/SPHK1/ZDHHC7/IGF1R/UHMK1 |
| WP_SREBF_AND_MIR33_IN_CHOLESTEROL_AND_LIPID_HOMEOSTASIS         | 1.3<br>496              | 0.2833<br>2715  | LDLR/ABCA1/SREBF1/PRKAA1/NR1H3/MED15/PPARA/MIR33A/MTOR/MIR33B/PPARGC1A                                                   |

|                                                           |                         |                 |                                                                                                                                          |
|-----------------------------------------------------------|-------------------------|-----------------|------------------------------------------------------------------------------------------------------------------------------------------|
|                                                           | 892<br>94               |                 |                                                                                                                                          |
| REACTOME_HDL_REMODELING                                   | 1.3<br>495<br>213<br>4  | 0.2953<br>48907 | LIPG/PLTP                                                                                                                                |
| WP_BMP_SIGNALING_PATHWAY_IN_EYELID_DEVELOPMENT            | 1.3<br>474<br>810<br>24 | 0.2470<br>81428 | FGF10/INHBB/JUN/DKK2/FOXC2/SMAD1/FOXC1                                                                                                   |
| WP_COPPER_HOMEOSTASIS                                     | 1.3<br>467<br>228<br>77 | 0.1493<br>87755 | STEAP4/STEAP3/XAF1/ADAM9/STEAP1/MT1H/FOXO1/JUN/MT1JP/SP1/ADAM10/FOXO3/ATP7A/STEAP2/MTF1/ADAM17/SOD3/MT1A/TP53/APP/AKT1/BACE1/PTEN/PIK3CA |
| REACTOME_DOWNSTREAM_SIGNAL_TRANSDUCTION                   | 1.3<br>443<br>751<br>79 | 0.2388<br>35979 | GRB7/STAT6/STAT5A/PDGFRB/STAT3/PLCG1/PDGFA/RASA1/STAT1/PDGFB/PIK3CA/SOS1/PIK3CB/GRB2/S<br>TAT5B                                          |
| PID_ENDOTHELIN_PATHWAY                                    | 1.3<br>418<br>621<br>45 | 0.1152<br>3586  | COL1A2/MMP1/COL3A1/ADCY7/GNA15/FOS/PLCB2/SLC9A1/ADCY3/PRKCD/JUN/GNA14/EDNRA/ADCY4/CYSLTR1/ADCY6/PLCB3/JAK2/ADCY9/MAPK14/SLC9A3/PRKCH     |
| WP_MIRNA_REGULATION_OF_PROSTATE_CANCER_SIGNALING_PATHWAYS | 1.3<br>406<br>478<br>73 | 0.1918<br>42938 | MIR4664/CREB3L1/PDGFRB/MIR200A/CDKN1A/NFKB1/FOXO1/NFKBIA/PDGFA/TP53/TCF7/AR/CREBBP/PIK3CA/NFATC2IP/BCL2/SOS1/MTOR/GRB2                   |
| REACTOME_SIGNALING_BY_RETINOIC_ACID                       | 1.3<br>394<br>010<br>78 | 0.1952<br>43017 | ALDH1A3/RDH10/ADH4/CYP26A1/CRABP2/ADH1A/FABP5/RARG/PDK3/CPT1B/PPARD                                                                      |
| BIOCARTA_VDR_PATHWAY                                      | 1.3<br>387              | 0.2413<br>55091 | VDR/BAZ1B/EP300/RXR/CREBBP/CARM1/SUPT16H/NCOR1/NCOA1/ARID1A/HDAC1/CHAF1A/MED1                                                            |

|                                                                                                 |                         |                 |                                                                                                                                                                                                                  |
|-------------------------------------------------------------------------------------------------|-------------------------|-----------------|------------------------------------------------------------------------------------------------------------------------------------------------------------------------------------------------------------------|
|                                                                                                 | 397<br>57               |                 |                                                                                                                                                                                                                  |
| REACTOME_SYNTHESIS_OF_PA                                                                        | 1.3<br>384<br>250<br>41 | 0.2319<br>9704  | PLA2R1/PLA2G2A/PLA2G2F/GPAT3/AGPAT2/PLA2G5/ACP6/PLA2G2D/PLA2G4D/PLA2G4B/PLD2/LPCAT1                                                                                                                              |
| PID_AJDISS_2PATHWAY                                                                             | 1.3<br>378<br>072<br>96 | 0.2035<br>35253 | MMP7/MET/IQGAP1/MMP3/EGF/JUP/CDH2/ARF6/PTPN6/ADAM10/CTNND1/BDNF/IGF1R/CTNNA1/ABL1/PTPN1/CREBBP/GNA12/CBLL1/GNA13/RIN2/TIAM1/DNM2/HGS/CASP3/ROBO1                                                                 |
| WP_PHYTOCHEMICAL_ACTIVITY_ON_NRF2_TRANSCRIPTIONAL_ACTIVATION                                    | 1.3<br>352<br>955<br>67 | 0.2985<br>90691 | CEBPB/HMOX1/GCLM/MAF/GSTA2/NFE2L2/PIK3CA/PRKCA                                                                                                                                                                   |
| REACTOME_INTRA_GOLGI_TRAFFIC                                                                    | 1.3<br>330<br>876<br>37 | 0.2085<br>01315 | MAN1A1/MAN1C1/MAN2A1/CYTH4/RAB39A/TRIP11/RIC1/CYTH3/RAB36/RGP1/BET1L/YKT6/COG5/GOLIM4/S<br>TX16/CUX1/GOSR1/MAN2A2/GOLGA5                                                                                         |
| PID_ERBB1_DOWNSTREAM_PATHWAY                                                                    | 1.3<br>313<br>482<br>86 | 0.1074<br>52575 | SH2D2A/IQGAP1/EGR1/RIN1/ZFP36/ARPC1B/PIK3CD/FOS/DUSP1/F2RL2/EGF/SLC9A1/VAV2/RPS6KA3/STAT<br>3/SFN/PRKCD/SRF/JUN/WASF2/SMAD1/DUSP6                                                                                |
| REACTOME_INTERLEUKIN_17_SIGNALING                                                               | 1.3<br>305<br>914<br>03 | 0.1112<br>98246 | NOD2/MAP3K8/FOS/IL17RA/DUSP4/IRAK2/NFKB1/RPS6KA3/JUN/IL25/DUSP6/MAP2K3/TRAF6/MEF2A/DUSP3<br>/MAPKAP2/MAPK14/IRAK1/IL17RC/TAB3/IKBKB/CUL1/RPS6KA1/TAB2/MAPK7/MAP3K7/UBC                                           |
| REACTOME_METABOLISM_OF_WATER_SOLUBLE_VITAMINS_AND_COFACTORS                                     | 1.3<br>297<br>673<br>92 | 0.0859<br>72    | PTGS2/NAMPT/MOCOS/PTGIS/SLC2A3/SLC52A1/NNMT/TCN1/VNN1/ENPP1/PARP14/PARP10/NT5E/VNN2/P<br>ARP4/ACP5/FOLR2/ABCC1/ACACB/SLC2A1/HLCS/MTR/CUBN/NADK/PARP9/SHMT1/SLC25A19/SLC5A6/MTH<br>FR/MTHFD1/CYP8B1/MTHFD1L/PANK2 |
| REACTOME_DISASSEMBLY_OF_THE_DESTRUCTI<br>ON_COMPLEX_AND_RECRUITMENT_OF_AXIN_TO<br>_THE_MEMBRANE | 1.3<br>290              | 0.2353<br>99597 | FZD1/WNT3A/FZD5/CAV1/FZD2/CSNK1G2/WNT1/LRP5                                                                                                                                                                      |

|                                                                                             |                         |                 |                                                                                                                                                                                                                                                                                                                                                                                                                                     |
|---------------------------------------------------------------------------------------------|-------------------------|-----------------|-------------------------------------------------------------------------------------------------------------------------------------------------------------------------------------------------------------------------------------------------------------------------------------------------------------------------------------------------------------------------------------------------------------------------------------|
|                                                                                             | 512<br>43               |                 |                                                                                                                                                                                                                                                                                                                                                                                                                                     |
| REACTOME_RHO_GTPASES_ACTIVATE_ROCKS                                                         | 1.3<br>283<br>392<br>6  | 0.2786<br>34173 | MYH9/MYL9/LIMK1/MYH11/ROCK1/ROCK2/LIMK2                                                                                                                                                                                                                                                                                                                                                                                             |
| WP_CANONICAL_AND_NONCANONICAL_NOTCH_SIGNALING                                               | 1.3<br>279<br>212<br>26 | 0.2300<br>08782 | DLK1/MFAP2/NOTCH3/LEF1/NOTCH2/ADAM10/DLL4/RRAS/JAG1/MAML1/MAML3/JAG2                                                                                                                                                                                                                                                                                                                                                                |
| REACTOME_DEATH_RECEPTOR_SIGNALLING                                                          | 1.3<br>279<br>118<br>08 | 0.1045<br>07116 | FASLG/TNFAIP3/BIRC3/TNFRSF10A/TNFRSF10D/ARHGEF35/VAV1/TNFRSF10B/FGD2/AKAP13/VAV2/TRAF1/ARHGEF5/NFKB1/CASP8/MYD88/RIPK1/PLEKHG2/TNFSF10/CFLAR/CASP10/TNFRSF1A/CASP2/NFKBIA/RNF31/BCL2L11/ARHGEF19/ARHGEF26/TRAF6/FAS/ARHGEF1/ARHGEF40/TRIO/ARHGEF18/ADAM17/ARHGEF15/IRAK1/ARHGEF12/SQSTM1/ARHGEF10/OTUD7B/NCSTN/FGD4/OTULIN/TAB3/ARHGEF6/IKBKB/NSMAF/CYLD/TRADD/TAB2/VAV3/MAP3K7/USP4/SOS1/GNA13/RBCK1/UBC/TIAM1/PRDM4/PREX1/PLEKHG5 |
| REACTOME_TP53_REGULATES_TRANSCRIPTION_OF_CELL_CYCLE_GENES                                   | 1.3<br>265<br>473<br>73 | 0.1908<br>40103 | PLAGL1/TNKS1BP1/E2F7/E2F8/CDKN1A/ARID3A/SFN/PLK3/GADD45A/EP300/CNOT1/TP53/PLK2/CNOT4/CNE1/CARM1/TFDP1/CDK2/CNOT3                                                                                                                                                                                                                                                                                                                    |
| PID_IL8_CXCR1_PATHWAY                                                                       | 1.3<br>234<br>875<br>49 | 0.2361<br>44869 | CXCR1/CXCL8/PIK3R6/PIK3CG/GNA15/PLCB2/HCK/GNA14/LYN/PLCB3/FGR/CBL/GRK2                                                                                                                                                                                                                                                                                                                                                              |
| WP_OXIDATIVE_STRESS                                                                         | 1.3<br>225<br>548<br>31 | 0.2573<br>96105 | XDH/SOD2/CYBB/JUNB/FOS/HMOX1/NFKB1/SP1/MAPK14/SOD3/MGST1                                                                                                                                                                                                                                                                                                                                                                            |
| REACTOME_RESOLUTION_OF_D_LOOP_STRUCTURES_THROUGH_SYNTHESIS_DEPENDENT_STRAND_ANNEALING_SDSA_ | 1.3<br>207<br>194<br>01 | 0.2542<br>07405 | RTEL1/BRCA1/RMI2/TOP3A/BARD1/ATM/RBBP8/BRCA2/RAD50/XRCC2/WRN/RAD51D/BRIP1/BLM/XRCC3                                                                                                                                                                                                                                                                                                                                                 |
| WP_BLOOD_CLOTTING_CASCADE                                                                   | 1.3<br>157              | 0.2735<br>93208 | SERPINE1/SERPIN2/PLAU/F3/FGG/F11/KLK1/VWF/KLKB1                                                                                                                                                                                                                                                                                                                                                                                     |

|                                                               |                         |                 |                                                                                                                                                                                                                                                                                                                                                                                            |
|---------------------------------------------------------------|-------------------------|-----------------|--------------------------------------------------------------------------------------------------------------------------------------------------------------------------------------------------------------------------------------------------------------------------------------------------------------------------------------------------------------------------------------------|
|                                                               | 211<br>79               |                 |                                                                                                                                                                                                                                                                                                                                                                                            |
| WP_HOSTPATHOGEN_INTERACTION_OF_HUMAN_CORONA_VIRUSES_APOPTOSIS | 1.3<br>156<br>465<br>21 | 0.2747<br>30216 | FASLG/MAPK13/MCL1/CASP8/CASP7/BCL2L11/MAPK14/AKT1/BCL2/CASP3/TNF/FADD/BAX/APAF1                                                                                                                                                                                                                                                                                                            |
| REACTOME_G_ALPHA_Q_SIGNALLING_EVENTS                          | 1.3<br>137<br>493<br>65 | 0.0440<br>29464 | XCR1/GNGT1/BDKRB1/FPR2/PTGFR/UTS2/CCL23/GCG/ITPR3/PROK2/BDKRB2/P2RY10/GPR39/F2RL1/PROKR1/NTS/GPR132/LTB4R2/P2RY6/LTB4R/FFAR2/FFAR3/SAA1/F2RL3/RGS2/GNA15/MMP3/HCRTR1/TAC3/F2RL2/HBEGF/CASR/HRH1/PLCB2/PTAFR/TRPC7/GRPR/P2RY1/QRFP/XCL2/KISS1R/AGTR1/TBXA2R/OXTR/RPS6KA3/GPR65/PRKCD/GNA14/F2R/EDNRA/ITPR2/NMUR1/GPR68/GNRH2/GRK5/RGS17/XCL1/CYSLTR1/FFAR4/RGS16/ANXA1/RASGRP1/ADRA1D/PLCB3 |
| REACTOME_BASIGIN_INTERACTIONS                                 | 1.3<br>127<br>723<br>54 | 0.2747<br>30216 | MMP1/ITGA3/SLC16A3/ITGB1/CAV1/SLC7A8/SPN/SLC7A7                                                                                                                                                                                                                                                                                                                                            |
| PID_NOTCH_PATHWAY                                             | 1.3<br>126<br>012<br>39 | 0.1546<br>47887 | DLK1/MFAP2/ADAM12/MFAP5/GATA3/NOTCH3/FURIN/NOTCH2/CDKN1A/ADAM10/NUMB/EP300/DLL4/JAG1/MAML1/NCSTN/CBL/JAG2/NCOR2                                                                                                                                                                                                                                                                            |
| KEGG_AMINO_SUGAR_AND_NUCLEOTIDE_SUGAR_METABOLISM              | 1.3<br>102<br>628<br>17 | 0.2574<br>80732 | HK3/GFPT2/HK2/HEXB/UAP1/NPL/RENBP/HEXA/HK1/AMDHD2/PMM2/GMPPB/PGM2/GNPNAT1/NANP/GPI                                                                                                                                                                                                                                                                                                         |
| REACTOME_SIGNALING_BY_HIPPO                                   | 1.3<br>089<br>253<br>33 | 0.2787<br>3201  | LATS2/YAP1/WWTR1/AMOTL1/MOB1A/STK4/STK3/LATS1/SAV1/WWC1/MOB1B/TJP1/CASP3/NPHP4/DVL2                                                                                                                                                                                                                                                                                                        |
| REACTOME_ANTIVIRAL_MECHANISM_BY_IFN_STIMULATED_GENES          | 1.3<br>069<br>005<br>64 | 0.1534<br>03458 | OAS3/FLNA/MX2/MX1/NUP210/POM121/UBA7/POM121C/OAS2/DDX58/OASL/PLCG1/EIF4G1/OAS1/NUP98/TRIM25/TPR/RNASEL/HERC5/STAT1/USP18/NUP188/NUP205/NEDD4/NUP62/NUP153/NUP214/KPNB1/RANBP2/ARIH1/FLNB/UBC/NUP155/NUP50/EIF4G3/EIF4A1/NUP160/NUP58/EIF2AK2                                                                                                                                               |
| WNT_SIGNALING                                                 | 1.3<br>067              | 0.1548<br>5213  | DKK1/SFRP4/FZD1/WNT3A/FZD7/TBXT/FZD8/FOSL1/FZD5/CCN4/LEF1/TLE1/CSNK1G1/JUN/FZD2/FZD4/DAM1/EP300/FZD6                                                                                                                                                                                                                                                                                       |

|                                                                           |                         |                 |                                                                                                                               |
|---------------------------------------------------------------------------|-------------------------|-----------------|-------------------------------------------------------------------------------------------------------------------------------|
|                                                                           | 648<br>46               |                 |                                                                                                                               |
| BIOCARTA_STATHMIN_PATHWAY                                                 | 1.3<br>064<br>521<br>5  | 0.2787<br>3201  | CD3E/CD3G/CD2/MAPK13/CD3D/CD247/HSPA5                                                                                         |
| WP_EGFR_TYROSINE_KINASE_INHIBITOR_RESISTANCE                              | 1.3<br>049<br>782<br>07 | 0.1540<br>45391 | IL6/MET/SHC1/ERBB2/PIK3CD/IL6R/EGF/PDGFRB/GAS6/VEGFA/PLCG2/NRG1/STAT3/AXL/PDGFD/HGF/BCL2L11/FOXO3/KDR/PLCG1/PDGFA/JAK2/RRAS   |
| PID_HES_HEY_PATHWAY                                                       | 1.3<br>009<br>817<br>86 | 0.2261<br>00386 | GATA6/RUNX2/RCAN1/GAA/CD4/TWIST1/TLE1/STAT3/ARNT/HIF1A/EP300/KDR/JAK2/MAML1/GHR/GATA1/NCOR2/CAMK2D/AR/RBBP8/CREBBP/HES1/NCOR1 |
| REACTOME_CD209_DC_SIGN_SIGNALING                                          | 1.3<br>002<br>973<br>35 | 0.2838<br>42795 | CD209/RELB/ICAM3/NFKB1/LYN/EP300                                                                                              |
| PID_RXR_VDR_PATHWAY                                                       | 1.3<br>000<br>204<br>8  | 0.2776<br>61064 | VDR/ABCA1/NR4A1/TGFB1/RARG/PPARD/SREBF1/RXRA/NCOR2/PPARG/BCL2/NR1H3/PPARA/NCOA1/TNF/FAM120B/RPS6KB1/MED1                      |
| KEGG_GLYCOLYSIS_GLUONEOGENESIS                                            | 1.2<br>998<br>977<br>58 | 0.1529<br>41176 | ALDH1A3/HK3/PCK1/ALDH3B2/ADH4/ALDH3A1/ALDH3B1/LDHC/ADH1A/HK2/GALM/PCK2                                                        |
| KEGG_N_GLYCAN_BIOSYNTHESIS                                                | 1.2<br>997<br>331<br>2  | 0.2571<br>70898 | B4GALT1/MAN1A1/MAN1C1/MAN2A1/MGAT2/MGAT4A/MGAT4B/GANAB/MGAT1/STT3A/STT3B/RPN2/ALG12/MOGS/ALG2/MGAT5                           |
| WP_MAMMARY_GLAND_DEVELOPMENT_PATHWAY_PREGNANCY_AND_LACTATION_STAGE_3_OF_4 | 1.2<br>940              | 0.2605<br>40318 | PRLR/TNFSF11/GJB2/TNFRSF11A/ERBB2/CEBPB/ESR1/ESR2/CAV1                                                                        |



|                                                                               |                         |                 |                                                                                                                                                                                                                                   |
|-------------------------------------------------------------------------------|-------------------------|-----------------|-----------------------------------------------------------------------------------------------------------------------------------------------------------------------------------------------------------------------------------|
|                                                                               | 665<br>74               |                 |                                                                                                                                                                                                                                   |
| KEGG_GNRH_SIGNALING_PATHWAY                                                   | 1.2<br>932<br>438<br>64 | 0.1403<br>1673  | ITPR3/MMP14/PLA2G2A/PLA2G2F/PLA2G4E/MAPK13/CALML6/ADCY7/HBEGF/PLCB2/ADCY3/PRKCD/PLA2G5/JUN/ITPR2/GNRH2/ADCY4/MAP3K3/PLA2G2D/MAP2K3/JMJD7-PLA2G4B/ADCY6/PLCB3/CACNA1C/ADCY9/MAPK14/PLA2G2C/GNRH1/PLA2G4B/PLD2/CAMK2D/MAP3K2/PRKACA |
| WP_FACTORS_AND_PATHWAYS_AFFECTING_INSULINLIKE_GROWTH_FACTOR_IGF1AKT_SIGNALING | 1.2<br>930<br>818<br>37 | 0.2912<br>80277 | PIK3CG/ITGB1/FBXO32/IRS1/TRIM63/NFKB1/TNFRSF1A/SMAD3/NEB/IGFBP5/IGF1R/AKT1/PTEN/IGF1/WASL/MTOR/RPTOR/DEPTOR/PPARGC1A/RPS6KB1                                                                                                      |
| WP_NEURAL_CREST_CELL_MIGRATION_DURING_DEVELOPMENT                             | 1.2<br>899<br>664<br>76 | 0.2713<br>45012 | MMP8/EPHB4/PIK3R6/PIK3CG/PIK3CD/MMP9/PIK3R5/FOS/CDH11/F2RL2/TWIST1/STAT3/JUN                                                                                                                                                      |
| BIOCARTA_TNFR1_PATHWAY                                                        | 1.2<br>896<br>685<br>7  | 0.2669<br>05921 | LMNA/CASP8/RIPK1/JUN/TNFRSF1A/CASP2/PRKDC/ARHGDI2/TRADD/MAP3K7/CASP3/TNF/TRAF2/PAK2/LMNB2/FADD                                                                                                                                    |
| PID_TGFBR_PATHWAY                                                             | 1.2<br>867<br>527<br>02 | 0.1899<br>0411  | SHC1/DAB2/TGFBR2/TGFB2/YAP1/CCN2/PML/TGFB1/CAV1/TGFB3/PPP1R15A                                                                                                                                                                    |
| WP_GENES_CONTROLLING_RENAL_NEPHROGENESIS                                      | 1.2<br>834<br>216<br>45 | 0.2815<br>993   | TCF21/ITGA3/KIRREL1/CXCL12/CD36/NOTCH2/ITGB1/CD2AP/LAMB2/EMX2/PDGFRB/VEGFA/WT1/SLIT2/PAX2/FOXC2/FOXC1/KDR                                                                                                                         |
| KEGG_GALACTOSE_METABOLISM                                                     | 1.2<br>823<br>745<br>52 | 0.2953<br>48907 | HK3/B4GALT1/GAA/HK2/LCT/MGAM/PFKL/GLB1/HK1                                                                                                                                                                                        |
| WP_HAIR_FOLLICLE_DEVELOPMENT_CYTODIFFERENTIATION_PART_3_OF_3                  | 1.2<br>819              | 0.2005<br>49854 | FOSB/DKK1/FST/FZD1/SPINK6/HOXC12/GATA3/DSC2/GLI2/KLK13/EGR2/IFNG/FOS/CCN2/ELANE/LEF1/TGFB1/NOTCH2/GSDMA/CASP14/NFKB1/RUNX3/JUN/PERP/KRT15/SMAD1/NFATC1/S100A4/IGFBP5/KITLG/SOX9                                                   |

|                                                                                           |                         |                 |                                                                                                                                                                                                                                                                       |
|-------------------------------------------------------------------------------------------|-------------------------|-----------------|-----------------------------------------------------------------------------------------------------------------------------------------------------------------------------------------------------------------------------------------------------------------------|
|                                                                                           | 513<br>31               |                 |                                                                                                                                                                                                                                                                       |
| WP_INTEGRATED_CANCER_PATHWAY                                                              | 1.2<br>817<br>755<br>37 | 0.2819<br>06957 | MMP1/CDKN2B/CDKN1A/BACH1/CASP8/SMAD3/MAP3K5/BRCA1/TP53/BARD1/ATM/STAT1/AKT1/RAD50/CDK2/ATR/PTEN/BCL2/NOXA1/CASP3/CDC25B/MSH6/BLM/BAX/SMAD2                                                                                                                            |
| WP_GLUTATHIONE_METABOLISM                                                                 | 1.2<br>778<br>856<br>13 | 0.3             | ANPEP/OPLAH/GGT2/GGTLC2/GCLM/GGT5/GSTM1/GPX2                                                                                                                                                                                                                          |
| REACTOME_TRANSLATION_OF_STRUCTURAL_PROTEINS                                               | 1.2<br>777<br>310<br>92 | 0.2767<br>18841 | ST3GAL1/ST6GALNAC2/PARP14/PARP10/PARP4/GANAB/MGAT1/PARP9/PRKCSH/MOGS/CANX/ST3GAL2/UBC/GALNT1/ST3GAL4/PARP16                                                                                                                                                           |
| WP_RENIN_ANGIOTENSIN_ALDOSTERONE_SYSTEM_RAAS                                              | 1.2<br>769<br>340<br>29 | 0.2906<br>38196 | ITPR3/CTSG/AGTR2/CMA1/CALML6/CREB3L1/PLCB2/CREB3L2/AGTR1/ACE/ITPR2/CALML4                                                                                                                                                                                             |
| REACTOME_TRANSCRIPTIONAL_REGULATION_BY_VENTX                                              | 1.2<br>749<br>663<br>13 | 0.2789<br>19558 | IL6/VENTX/CEBPB/LEF1/CSF1R/MOV10/NFKB1                                                                                                                                                                                                                                |
| WP_CHROMOSOMAL_AND_MICROSATELLITE_INSTABILITY_IN_COLORECTAL_CANCER                        | 1.2<br>747<br>546<br>01 | 0.1871<br>56711 | PTGS2/TGFB2/TGFB2/REL/RAC2/FOS/LEF1/TGFB1/GADD45B/CDKN1A/TGFB3/JUN/GADD45A/SMAD3/BCL2L1/PMAIP1/TP53/TCF7/ARAF/DDB2                                                                                                                                                    |
| PID_HEDGEHOG_GLI_PATHWAY                                                                  | 1.2<br>742<br>699<br>11 | 0.2832<br>12787 | GLI1/GLI3/GLI2/FOXA2/CSNK1G1/PRKCD/LGALS3/STK36/SMO/SIN3A/SIN3B/CSNK1G2/PRKACA/SHH/RAB23/AKT1/CREBBP/IFT172/CSNK1D/PIAS1/GNAI2                                                                                                                                        |
| REACTOME_DISEASES_OF_SIGNAL_TRANSDUCTION_BY_GROWTH_FACTOR_RECEPTORS_AND_SECOND_MESSENGERS | 1.2<br>728              | 0.0674<br>91276 | EREG/DKK1/ICOS/MET/FN1/SHC1/WNT3A/AREG/LCK/FGF19/TGFB2/TRAT1/ITGB3/IQGAP1/FZD8/FGF10/FZD5/ERBB2/FGFR1/CD80/PIK3CD/SPRED3/CD28/VCL/PIK3AP1/NR4A1/RAC2/HHAT/ESR1/ESR2/VAV1/TGFB1/HBEGF/EGF/STAT5A/PTPN12/PDGFRB/TLN1/DHH/ETV6/FGG/HDAC7/ZC3HAV1/IRS1/BIN2/LMNA/CDKN1A/N |

|                                                  |                         |                 |                                                                                                                                                                                                                                                                                                                                                                                                                                                     |
|--------------------------------------------------|-------------------------|-----------------|-----------------------------------------------------------------------------------------------------------------------------------------------------------------------------------------------------------------------------------------------------------------------------------------------------------------------------------------------------------------------------------------------------------------------------------------------------|
|                                                  | 034<br>29               |                 | RG1/IRS2/SPRED2/STAT3/VWF/FOXO1/LYN/DKK2/FGF5/KL/KREMEN2/ADAM10/SMAD3/HGF/FZD4/DUSP6/BTC/TBL1X/SEL1L/PRR5/BCL2L11/FOXO3/EP300/LRRFIP1/KDR/APBB1IP/DLL4/PSME4/PLCG1/KITLG/PDGFA/FZD6/JAK2/CD86/ERBIN/JAG1/ADAM17/MAML1/GOLGA4/MAML3/ITGA2B/AKAP9/NCSTN/SPRED1/CBL/ARAF/JAG2/NCOR2/CAMK2D/LRP5/STAT1/SND1/MAP3K11/MIB2/AP3B1/PDGFB/SHH/HDAC10/FGF7/AGTRAP/AKT1/SYVN1/BRAF/CREBBP/CUL1/CNTRL/MPRIIP/HEYL/POLR2A/KDM7A/PTEN/CUX1/EPGN/PIK3CA/HES1/NCOR1 |
| PID_ER_NONGENOMIC_PATHWAY                        | 1.2<br>685<br>472<br>34 | 0.2906<br>38196 | SHC1/GNA15/MMP9/ESR1/ESR2/HBEGF/PLCB2/MSN/GNA14/NOS3/ROCK2/PLCB3/IGF1R/AKT1/MMP2/PIK3CA/SOS1/GNAI2/GNA13                                                                                                                                                                                                                                                                                                                                            |
| REACTOME_SUMOYLATION_OF_UBIQUITINYLATED_PROTEINS | 1.2<br>681<br>071<br>9  | 0.2820<br>0569  | PML/NUP210/POM121/POM121C/NUP98/TPR/NUP188/NUP205/NUP62/NUP153/NUP214/RANBP2/PIAS1/NUP155/NUP50/NUP160/NUP58                                                                                                                                                                                                                                                                                                                                        |
| REACTOME_REGULATION_OF_LIPID_METABOLISM_BY_PPARG | 1.2<br>678<br>356<br>95 | 0.1555<br>35942 | APOA2/ANGPTL4/G0S2/FHL2/PLIN2/HELZ2/ABCA1/NPAS2/CD36/GLIPR1/CYP7A1/ACSL1/PPARGC1B/ARNT/SP1/RORA/MED14/TBL1X/EP300/MTF1/SREBF1/CLOCK/SIN3A/MED12/RGL1/SLC27A1/NCOA3/RXRA/MED23/SIN3B/NCOR2/PPARG/THRAP3/CREBBP/CARM1/NR1D1/CPT1A/NCOR1/NR1H3/MED15/PPARA/NCOA1/ABCB4/APOA1/NCOA6/MED13/PPARGC1A/FAM120B/MED25/GPS2/MED26/ARNTL/NFYA/MED16/MED1/TGS1                                                                                                  |
| ST_ERK1_ERK2_MAPK_PATHWAY                        | 1.2<br>649<br>229<br>39 | 0.2769<br>43412 | SHC1/MAP3K8/DUSP4/KLF6/NFKB1/MKNK2/RPS6KA3/MKNK1/TRAF3/DUSP6/EEF2K/ARAF/BRAF/RPS6KA1/CREB5/SOS1/GRB2/RPS6KA2                                                                                                                                                                                                                                                                                                                                        |
| REACTOME_DAP12_SIGNALING                         | 1.2<br>610<br>883<br>15 | 0.2895<br>29418 | GRAP2/SHC1/LCK/LCP2/SYK/PLCG2/VAV2/KLRD1/PLCG1/HLA-E/BTK/LAT/VAV3/PIK3CA/SOS1/PIK3CB/GRB2                                                                                                                                                                                                                                                                                                                                                           |
| WP_FERROPTOSIS                                   | 1.2<br>600<br>700<br>16 | 0.2953<br>48907 | CP/STEAP3/CYBB/SLC39A14/SLC39A8/MAP1LC3C/ACSL1/HMOX1/GCLM/LPCAT3/SAT1/ACSL3/ACSL5/TP53                                                                                                                                                                                                                                                                                                                                                              |
| REACTOME_TOLL_LIKE_RECEPTOR_10_TLR10_CASCADE     | 1.2<br>587              | 0.1979<br>47081 | NOD2/SAA1/MAP3K8/TLR5/NFKB2/FOS/DUSP4/IRAK2/NFKB1/RPS6KA3/MYD88/JUN/NFKBIA/S100A12/DUSP6/MAP2K3/TRAF6/MEF2A/DUSP3/MAPKAPK2/MAPK14/IRAK1/TAB3/IKBK/APP/CUL1/RPS6KA1/TAB2/MAPK7                                                                                                                                                                                                                                                                       |

|                                                                 |                         |                 |                                                                                                                                                                                       |
|-----------------------------------------------------------------|-------------------------|-----------------|---------------------------------------------------------------------------------------------------------------------------------------------------------------------------------------|
|                                                                 | 736<br>28               |                 |                                                                                                                                                                                       |
| PID_MAPK_TRK_PATHWAY                                            | 1.2<br>560<br>264<br>52 | 0.2953<br>48907 | NTF3/EGR1/FOS/TRPV1/PRKCD/SRF/MAP2K3/MAPKAPK2/MAPK14/EHD4/MAP3K2/BRAF/RPS6KA1/MAPK7/RUSC1                                                                                             |
| WP_TRYPTOPHAN_METABOLISM                                        | 1.2<br>533<br>321<br>38 | 0.2769<br>43412 | CYP1B1/TDO2/TPH1/KYNU/CYP4F12/CYP2F1/ACMSD/MAOB/OGDH/WARS1/AOC1                                                                                                                       |
| BIOCARTA_PDGF_PATHWAY                                           | 1.2<br>511<br>569<br>59 | 0.2951<br>3975  | SHC1/PIK3CG/FOS/STAT5A/STAT3/SRF/JUN/PLCG1/PDGFA/RASA1/STAT1/PIK3CA/SOS1/PRKCA/GRB2                                                                                                   |
| REACTOME_HEPARAN_SULFATE_HEPARIN_HS_GAG_METABOLISM              | 1.2<br>511<br>033<br>28 | 0.2294<br>60505 | HS3ST3B1/SDC1/HSPG2/BGN/GPC4/HPSE/HS3ST3A1/GUSB/HGSNAT/GPC1/HS6ST1/GPC5/SGSH/XYL2/A<br>GRN/SDC2/GPC6/VCAN/SDC4/EXT1/DCN/GLB1/EXT2/IDUA                                                |
| PID_EPHRINB_REV_PATHWAY                                         | 1.2<br>459<br>014<br>21 | 0.2864<br>49472 | LCK/EPHB4/ITGB3/EFNB2/BLK/HCK/FGG/LYN/FGR/CXCR4/ITGA2B/RGS3                                                                                                                           |
| KEGG_HYPERTROPHIC_CARDIOMYOPATHY_HCM                            | 1.2<br>440<br>204<br>86 | 0.2185<br>6327  | IL6/ITGA2/LAMA2/ITGA11/ITGA4/ITGA3/ITGB4/ITGA5/ITGB3/ITGA10/TGFB2/ITGB7/TGFB1/ITGB1/ITGB5/MYBP<br>C3/LMNA/ITGA1/TGFB3/CACNA2D4/ACE/TPM2/TPM4/ITGA7/SLC8A1/DMD                         |
| WP_MIRNA_REGULATION_OF_P53_PATHWAY_IN_PROSTATE_CANCER           | 1.2<br>398<br>265<br>64 | 0.2985<br>90691 | SERPINE1/TNFRSF10B/CASP8/PERP/PMAIP1/MIR27B/TP53/DDB2/ATM/SHISA5/PTEN/SESN3/MIR4482/CASP<br>3/ZMAT3/BAX/APAF1                                                                         |
| REACTOME_REGULATION_OF_CHOLESTEROL_BIOSYNTHESIS_BY_SREBP_SREBF_ | 1.2<br>374              | 0.2405<br>9466  | HELZ2/CYP51A1/SEC24D/SP1/ACACB/INSIG1/TBL1X/MTF1/SREBF1/SEC23A/RXRA/SEC24A/CREBBP/CARM<br>1/KPNB1/MBTPS2/SEC24C/PPARA/NCOA1/MBTPS1/NCOA6/ELOVL6/LSS/SCAP/SEC24B/NFYA/MED1/TGS1/INSIG2 |

|                                                   |                         |                 |                                                                                                                                                                                                                                            |
|---------------------------------------------------|-------------------------|-----------------|--------------------------------------------------------------------------------------------------------------------------------------------------------------------------------------------------------------------------------------------|
|                                                   | 311<br>63               |                 |                                                                                                                                                                                                                                            |
| REACTOME_METABOLISM_OF_VITAMINS_AND_COFACTORS     | 1.2<br>369<br>528<br>06 | 0.1152<br>3586  | PTGS2/SDC1/NAMPT/APOA2/MOCOS/HSPG2/PTGIS/SLC2A3/LRP1/APOB/LDLR/SLC52A1/GPC4/NNMT/TCN1/GCH1/PLB1/VNN1/AKR1B10/ENPP1/LRP10/PARP14/PARP10/NT5E/VNN2/PARP4/ACP5/LRAT/FOLR2/GPC1/NOS3/ABCC1/ACACB/GCHFR/SLC2A1/GPC5/HLCS/LPL/MTR/AGRN/CUBN/SDC2 |
| REACTOME_NUCLEAR_SIGNALING_BY_ERBB4               | 1.2<br>357<br>238<br>85 | 0.2953<br>48907 | EREG/YAP1/CXCL12/ESR1/HBEGF/STAT5A/NRG1                                                                                                                                                                                                    |
| PID_E2F_PATHWAY                                   | 1.2<br>342<br>037<br>05 | 0.2241<br>19832 | SERPINE1/HIC1/CES1/PLAU/E2F7/CDKN1A/MCL1/TRRAP/CASP7/CES3/SP1/MCM3/EP300/SMARCA2/CDKN2A/BRCA1/POLA1/TFE3/ATM/RBBP8/CCNE1/CREBBP/TFDP1/CDK2                                                                                                 |
| PID_WNT_NONCANONICAL_PATHWAY                      | 1.2<br>331<br>146<br>13 | 0.2999<br>67365 | ROR2/FZD7/FZD5/FLNA/CTHRC1/NFATC2/FZD2/ROCK1/DAAM1/FZD6                                                                                                                                                                                    |
| REACTOME_PHASE_I_FUNCTIONALIZATION_OF_COMPOUNDS   | 1.2<br>324<br>226<br>54 | 0.2248<br>87654 | CYP1B1/CYP4F22/PTGIS/FMO1/CES1/CYP4F2/PTGS1/ADH4/CYP26A1/CYP2W1/ALDH3A1/CYP4F12/CYP51A1/ADH1A/CYP7A1/CYP2F1/AOC3/MAOB/ARNT/CES3/CYP2S1/TBXAS1/AOC1/CYP24A1                                                                                 |
| PID_RAC1_PATHWAY                                  | 1.2<br>274<br>854<br>09 | 0.2620<br>64469 | CYBB/IQGAP1/ARPC1B/NCF2/STAT5A/PLCB2/LIMK1/NCF1/STAT3/JUN/IQGAP3/WASF2/MAP2K3/MAPK14/ACTR2/CTNNA1/MAP3K11                                                                                                                                  |
| REACTOME_SYNTHESIS_OF_PIP2_AT_THE_PLASMA_MEMBRANE | 1.2<br>261<br>239<br>71 | 0.2982<br>056   | PIK3R6/PIK3CG/PIK3CD/PLEKHA4/PIK3R5/INPP5D/SYNJ2/INPP4B/INPPL1/RUFY1/PI4K2B/PLEKHA8/PIK3C2A/PTEN/INPP4A/PI4K2A/PIK3CA/SBF2/PIP5K1A/PLEKHA2/MTM1/MTMR1/PIK3CB/PIP5K1C/PTPN13/MTMR3                                                          |
| PID_FGF_PATHWAY                                   | 1.2<br>213              | 0.2798<br>40598 | MET/SHC1/RUNX2/PLAUR/FGF19/FGFR1/MMP9/PLAU/FOS/SSH1/CDH2/JUN/SPRY2/HGF/SPP1/SDC2/PLCG1/CTNND1                                                                                                                                              |

|                                                       |                         |                 |                                                                                                                                                                                                                                                                                                                                                               |
|-------------------------------------------------------|-------------------------|-----------------|---------------------------------------------------------------------------------------------------------------------------------------------------------------------------------------------------------------------------------------------------------------------------------------------------------------------------------------------------------------|
|                                                       | 451<br>74               |                 |                                                                                                                                                                                                                                                                                                                                                               |
| KEGG_INOSITOL_PHOSPHATE_METABOLISM                    | 1.2<br>154<br>440<br>98 | 0.2927<br>89353 | PLCZ1/PIK3CG/PIK3CD/IMPA2/PLCB2/PLCG2/SYNJ2/PLCE1/INPP4B/INPPL1/PLCG1/PLCB3/IPPK/INPP5B/PIK3C2A/PTEN/INPP4A/PIK3CA/MIOX/PIP5K1A/PIKFYVE/ITPKB/PIK3CB/PIP5K1C                                                                                                                                                                                                  |
| KEGG_VASCULAR_SMOOTH_MUSCLE_CONTRACTION               | 1.2<br>126<br>005<br>4  | 0.2280<br>92883 | ITPR3/PLA2G2A/PLA2G2F/PTGIR/PLA2G4E/CALML6/ADCY7/ACTG2/PRKG1/CALD1/NPR1/PLCB2/MYL9/AGTR1/ADCY3/PRKCD/PLA2G5/KCNMB3/EDNRA/ITPR2/ACTA2/MYH11/ADCY4/PLA2G2D/ROCK1/ROCK2/JMJD7-PLA2G4B/ADCY6/ADRA1D/PLCB3/CACNA1C/ADCY9/NPR2/ARHGEF1/PLA2G2C/AVPR1A/ARHGEF12/RAMP3/PLA2G4B/ARAF/ADORA2A/PRKCH                                                                     |
| KEGG_INSULIN_SIGNALING_PATHWAY                        | 1.2<br>091<br>894<br>87 | 0.2182<br>30186 | CBLC/HK3/PCK1/SHC1/SOCS3/PPP1R3B/PIK3CG/CALML6/PYGL/PIK3CD/PIK3R5/PDE3A/SOCS1/HK2/PTPRF/INPP5D/IRS1/TRIP10/PCK2/IRS2/MKMK2/FOXO1/ACACB/MKMK1/FBP1/GYS1/SREBF1/PPP1R3D/PHKA2/INSR/CBL/ARAF/HK1/PRKACA/IKBKB/PTPN1/SOCS2/AKT1/BRAF                                                                                                                              |
| KEGG_ERBB_SIGNALING_PATHWAY                           | 1.1<br>984<br>634<br>85 | 0.2769<br>43412 | EREG/CBLC/SHC1/AREG/PIK3CG/ERBB2/PIK3CD/PIK3R5/HBEGF/EGF/STAT5A/PLCG2/ABL2/CDKN1A/NRG1/JUN                                                                                                                                                                                                                                                                    |
| REACTOME_STIMULI_SENSING_CHANNELS                     | 1.1<br>974<br>894<br>25 | 0.2479<br>58865 | SCNN1B/ANO1/ANO9/TRPA1/WNK4/SCNN1G/TRPM8/SCNN1A/TRPV4/STOML3/TTYH3/RYR3/TRPM2/MLKL/CLCA2/TRPC7/TRPM5/RIPK3/TRPV1/TRPV2/CLCNKB/ANO6/RIPK1/TRPM3/STOM/CLCA1/TPCN1/SLC17A3                                                                                                                                                                                       |
| REACTOME_INTRACELLULAR_SIGNALING_BY_SECOND_MESSENGERS | 1.1<br>962<br>663<br>47 | 0.1729<br>31716 | EREG/ICOS/ITPR3/MET/SNAI2/AREG/LCK/FGF19/TRAT1/IER3/EGR1/SALL4/FGF10/ERBB2/ADCY7/NR2E1/FGFR1/CD80/PIK3CD/IL1RL1/CD28/PIK3AP1/NR4A1/RAC2/PML/IL1RAP/ESR1/ESR2/VAV1/HBEGF/EGF/MOV10/PDGFRB/HDAC7/IRS1/PDE1C/CDKN1A/NRG1/IRS2/ADCY3/MYD88/FOXO1/PRKCD/JUN/REST/ITPR2/RCOR1/FGF5/KL/ADCY4/HGF/BTC/PRR5/FOXO3/ADCY6/PHC3/PSME4/PLCG1/KITLG/PDGFA/CD86/TRAFF6/ADCY9 |
| WP_GENES_INVOLVED_IN_MALE_INFERTILITY                 | 1.1<br>954<br>775<br>78 | 0.2631<br>7148  | THBS1/DAZL/EPPIN/NOS2/FASLG/SOD2/SIRPG/LTF/APOB/H3-4/PIWIL1/MMP9/ESR1/ESR2/HORMAD1/RAG1/NOS3/MSH5/TSSK4/TMEM132E/MTR/ETV5/EP300/EPSTI1/CLOCK/MOV10L1/FAS/PMS2/CDC42BPA/VCX/SOD3/INSR/SHMT1/MTHFR/MTHFD1/ATM/CHD2/AR/POLG/PIWIL4/NFE2L2/HLA-DRA/CCNK/CCNT1/MMP2/PIWIL2/CREBBP/XPC/BRCA2/TCN2/XRCC2/SIRPA/MLH3/BCL2/UBR2/ERCC2/UBD                              |

|                                               |                              |                 |                                                                                                                                                                                                                                                                                                                                                                                                                                                                                                                                                              |
|-----------------------------------------------|------------------------------|-----------------|--------------------------------------------------------------------------------------------------------------------------------------------------------------------------------------------------------------------------------------------------------------------------------------------------------------------------------------------------------------------------------------------------------------------------------------------------------------------------------------------------------------------------------------------------------------|
| KEGG_WNT_SIGNALING_PATHWAY                    | 1.1<br>806<br>879<br>31      | 0.2804<br>5977  | SFRP2/DKK1/SFRP4/MMP7/FZD1/WNT3A/FZD7/FZD8/FOSL1/FZD5/NFATC4/RAC2/LEF1/PLCB2/NFATC2/SFRP5/JUN/FZD10/DKK2/PPARD/FZD2/ROCK1/SMAD3/NFATC1/FZD4/TBL1X/NKD2/DAAM1/NFAT5/VANGL1/ROCK2/NFATC3/EP300/CER1/PLCB3/PRICKLE2/FZD6                                                                                                                                                                                                                                                                                                                                        |
| WP_INTEGRATED_BREAST_CANCER_PATHWAY           | 1.1<br>740<br>031<br>74      | 0.2806<br>2499  | MMP1/FOSL2/TGFBR2/FOSL1/PML/ESR1/GRN/ITPKC/VEGFA/IRS1/NFKB1/BACH1/CASP8/FOXO1/JUN/PLK3/SP1/GADD45A/SMAD1/ANXA1/EP300/WEE1/RRAS/TPR/BRCA1/TP53/NCOA3/ARAF/ZNF655/BARD1/ATM/FILIP1/STAT1/AR/ABL1/DAG1/AKT1/BRAF/TRADD/BRCA2/RAD50/CDK2/ATR/PPP4R3A/PTEN/APOBEC3G/CSNK1D/BCL2/TGFBR1/PIAS1/MTOR/SMAD6/NOXA1/FER/MAP3K7CL/STK11/CASP3/CDC25B/MAX/HDAC1                                                                                                                                                                                                           |
| REACTOME_MAPK_FAMILY_SIGNALING_CASCADES       | 1.1<br>564<br>977<br>98      | 0.1934<br>14634 | EREG/CSF2/IL6/IL2RA/MMP10/MET/IL2RB/CSF2RB/FN1/SHC1/JAK3/IGF2BP1/AREG/FGF19/IL2RG/ITGB3/IQGAP1/FGF10/ERBB2/FGFR1/PTPN7/SPTA1/SPRED3/IL6R/VCL/FLT3/DUSP1/ARTN/HBEGF/MIR34C/EGF/MOV10/PDGFRB/RASAL3/DUSP4/RASGRP4/TLN1/FGG/IRS1/RAG1/DUSP5/NRG1/IRS2/SPRED2/MIR34B/CDC42EP3/VWF/FOXO1/MAPK4/JUN/FGF5/KL/SPTBN5/ABHD17C/ANGPT1/HGF/DUSP6/BTC/TYK2/FOXO3/CDC42EP5/HSPB1/RASGRP1/APBB1IP/PSME4/KITLG/RASA2/PDGFA                                                                                                                                                  |
| REACTOME_SIGNALING_BY_NTRKS                   | 1.1<br>480<br>273<br>1       | 0.2776<br>61064 | FOSB/NTF3/SHC1/PCSK5/EGR1/FOSL1/EGR2/NTRK1/TPH1/MAPK13/EGR3/FURIN/JUNB/FOS/DUSP4/F3/RRAD/IRS1/IRS2/RPS6KA3/STAT3/TRIB1/SRF/REST                                                                                                                                                                                                                                                                                                                                                                                                                              |
| WP_MAPK_SIGNALING_PATHWAY                     | 1.1<br>362<br>271<br>27      | 0.2773<br>05047 | NTF3/IL1R1/FASLG/IL1R2/FGF19/TGFBR2/PLA2G4E/FGF10/NTRK1/MAPK13/TGFB2/RELB/MAP3K8/FGFR1/MAP3K6/PTPN7/FLNA/NFKB2/CD14/NR4A1/RAC2/FOS/IL1B/DUSP1/TGFB1/EGF/PDGFRB/DUSP4/RASGRP4/MAP4K1/IL1A/HSPA1B/MAP3K14/TGFB3/CACNA2D4/NFKB1/MKNK2/ELK4/RPS6KA3/HSPA6/HSPA1A/PRKCD/SRFB/JUN/FGF11/MAP3K20/TNFRSF1A/FGF5/MKNK1/GADD45A/NFATC1/DUSP6/MAP2K3/NFATC3/PLA2G4D/HSPB1/RASGRP1/RASA2/PDGFA/PLA2G4F/CACNA1C/MAP3K12/TRAF6/MAP3K5/RRAS/FAS/CACNG6/DUSP3/MAPKAPK2/MAPK14/BDNF/STK4/TP53/PLA2G4B/RASA1/DUSP2/ARAF/STK3/MAP3K2/MAP3K11/PRKACA/RPS6KA4/IKBKB/PDGFB/CACNA1G |
| REACTOME_MRNA_SPLICING                        | -<br>1.1<br>816<br>839<br>67 | 0.2815<br>56973 | GTF2F2/CSTF3/SNRPA1/CD2BP2/PCBP2/HNRNPC/LSM6/PPIL3/ALYREF/WBP4/SRSF3/RBMX/SNRNP40/BCAS2/FIP1L1/SNRNP27/MAGOHB/LSM5/POLR2C/DNAJC8/POLR2L/SF3B6/SNRNP35/POLR2J/SNRPB2/BUD31/TXNL4A/ZCRB1/SNRPD1/YBX1/SNRPF/PQBP1/LSM4/SNRPB/PUF60/SNU13/SNRPC/CWC15/POLR2K/SF3B5/POLR2I/PPIH/ZMAT5/PHF5A/LSM3/POLR2G/SNRPD2/SNRPE/PPIL1/SNRNP25/LSM7/LSM2/SNRPG/SNRPN/ELAVL2/POLR2F                                                                                                                                                                                            |
| REACTOME_SLC_MEDIATED_TRANSMEMBRANE_TRANSPORT | -<br>1.1<br>832              | 0.2735<br>93208 | SLC5A7/SLC24A5/SLC22A2/SLC15A2/SLC26A3/SLC36A2/SLC13A2/PDZD11/SRI/SLC13A5/SLC2A2/SLC6A3/SLC26A9/SLC6A19/LCN12/SLC4A9/SLC30A8/SLC3A1/SLC5A1/SLC14A2/SLC38A1/ARL2/SLC4A10/SLCO1B1/SLC13A1/SLC2A13/SLC45A3/SLC25A4/SLC24A2/SLC18A1/SLC44A5/SLC6A13/SLC22A8/SLC14A1/SLC5A12/AVP/SLC22A12/SLC44A1/SLCO1B3/SLC6A20/LCN1/LCN9/SLC39A2/SLCO1A2/SLC5A11/SLC32A1/APOD/SLC1A1/                                                                                                                                                                                          |

|                                      |                              |                 |                                                                                                                                                                                                                                                                                                                                                                                                                                                                                                                                                                                                                                                                                                                                                                                                                                                                                                                                                                                                                                                                                                                                                                                                                                                                                                                                                                                                                       |
|--------------------------------------|------------------------------|-----------------|-----------------------------------------------------------------------------------------------------------------------------------------------------------------------------------------------------------------------------------------------------------------------------------------------------------------------------------------------------------------------------------------------------------------------------------------------------------------------------------------------------------------------------------------------------------------------------------------------------------------------------------------------------------------------------------------------------------------------------------------------------------------------------------------------------------------------------------------------------------------------------------------------------------------------------------------------------------------------------------------------------------------------------------------------------------------------------------------------------------------------------------------------------------------------------------------------------------------------------------------------------------------------------------------------------------------------------------------------------------------------------------------------------------------------|
|                                      | 020<br>61                    |                 | SLC30A3/SLC12A5/SLC5A8/SLC6A15/SLC8A2/SLC1A6/LCN15/SLC17A6/FGF21/SLC17A8/SLC8A3/SLC22A6/SLC17A7/SLC6A7                                                                                                                                                                                                                                                                                                                                                                                                                                                                                                                                                                                                                                                                                                                                                                                                                                                                                                                                                                                                                                                                                                                                                                                                                                                                                                                |
| REACTOME_AUTOPHAGY                   | -<br>1.2<br>264<br>717<br>9  | 0.2632<br>70712 | RHEB/CSNK2B/PRKAB2/TSG101/PEX5/DYNC1LI1/LAMTOR2/TUBA1B/ATG12/UBA52/MAP1LC3A/GFAP/TUBB2A/CHMP6/VPS37B/PRKAG1/TUBB2B/LAMTOR3/FUNDC1/TOMM20/EEF1A1/HBB/TUBA4B/PRKAG2/RRAGB/P<br>GAM5/GABARAP/RPS27A/MAP1LC3B/LAMTOR1/VPS28/TUBA4A/TUBAL3/UBB/PARK7/TUBB3/TUBA3C/MLST<br>8/TOMM5/GABARAPL1/UBE2N/DYNLL1/LAMTOR5/VPS37D/MVB12B/LAMTOR4/CFTR/TOMM22/ATG9B/GABA<br>RAPL2/TUBA8/TUBA1A/DYNC1I1/TUBB4A                                                                                                                                                                                                                                                                                                                                                                                                                                                                                                                                                                                                                                                                                                                                                                                                                                                                                                                                                                                                                         |
| WP_GPCRS_CLASS_A_RHODOPSINLIKE       | -<br>1.2<br>327<br>897<br>06 | 0.1977<br>64065 | HCRTR2/OR2H1/NPY6R/NMUR2/OPN4/FSHR/OR1E1/ADRA2C/GPR85/OPRD1/OR2J2/NPY5R/GPR45/CCKBR/<br>HTR2A/LPAR4/DRD1/GPR27/OR1F1/GPR12/NPY1R/PTGER3/SSTR5/HTR6/HTR2C/GPR50/NTSR1/FFAR1/OP<br>RM1/SSTR3/SSTR4/SSTR2/MAS1/GPR6/PRLHR/MC4R/GPR52/GPR22/CHRM2/NPBWR2/GPR83/DRD5/CHRM<br>1/HTR5A/HRH3/HTR1E/HTR1A/SSTR1/GPR17                                                                                                                                                                                                                                                                                                                                                                                                                                                                                                                                                                                                                                                                                                                                                                                                                                                                                                                                                                                                                                                                                                          |
| REACTOME_OLFACTORY_SIGNALING_PATHWAY | -<br>1.2<br>401<br>982<br>65 | 0.1423<br>98244 | OR8B8/OR1A1/OR8G1/OR5H2/OR51G2/OR5P3/OR56A4/OR56A1/OR2M5/OR2F2/OR4C11/OR6C6/OR14A16/O<br>R5D16/OR4M2/OR2G6/OR5K3/OR10AG1/OR51B6/OR56A3/OR51B2/OR10S1/OR10D3/OR51A7/OR51F2/OR5P<br>2/OR4K14/OR4D2/OR10C1/OR4F4/OR7D2/OR52J3/OR10A5/OR2Y1/OR14A2/OR6K3/OR8D1/OR4E1/OR2V1/O<br>R1D2/OR7C2/OR4D1/OR10G4/OR6C3/OR10A2/OR13J1/OR10H3/OR2T1/OR4P4/OR2G3/OR2T12/OR10T2/OR5<br>AS1/OR5T2/OR1S1/OR5A2/OR4D6/OR4C13/OR51D1/OR10A6/OR5W2/OR8H2/OR8H3/OR5T3/OR5M1/OR2T35<br>/OR5H15/OR5K4/OR2W1/OR11H2/OR6K2/OR51S1/OR10J5/OR52Z1/OR5T1/OR1B1/OR9G4/OR10A7/OR5B17/<br>OR11G2/OR4N5/OR11L1/OR6B1/OR14C36/OR6F1/OR13C3/OR52A5/OR5K1/OR6C70/OR2V2/REEP2/OR5111/<br>OR4F21/OR2A1/OR1G1/OR51B5/OR51G1/OR8H1/OR1S2/OR51V1/OR5AP2/OR5AN1/OR10V1/OR4K13/OR2M<br>7/OR6X1/OR8K5/OR5A1/OR2M2/OR9G1/OR2T10/OR13C4/OR52E6/OR4K17/OR13C8/OR4F15/OR7G2/OR10J1<br>/OR4K5/OR1C1/OR11H1/OR6V1/OR1L4/OR51Q1/OR52H1/OR52D1/OR51J1/OR2A7/OR6C74/OR2A14/OR13H1<br>/OR4L1/OR4X2/OR5J2/OR2T6/OR10G8/OR14J1/OR2S2/OR7G1/OR13F1/OR13D1/OR51M1/OR2M3/OR13C2/O<br>R4A16/OR8B12/OR13C9/OR2A5/OR52E5/OR8A1/OR51I2/OR2A42/OR5B12/OR2W3/OR6M1/OR2L5/OR2AJ1/O<br>R2B2/OR2AG2/OR13C5/OR4F5/OR5C1/OR10W1/OR6T1/OR1L6/OR12D2/OR2A4/OR1N2/OR11A1/OR2C1/OR5<br>K2/OR4A47/OR7A5/OR13A1/OR2D2/RTP2/OR5AC2/OR5AK2/RTP1/OR2T33/OR2H1/OR2T4/REEP1/OR1E1/OR<br>2K2/OR2L3/OR2J2/OR4F6/GNAL/OR4K1/OR2T8/OR1F1/OR4K2/OR6B3/OR10H5/OR10Q1/OR9A2/RTP5/OR2L2<br>/OR14I1/OR2L13/OR4N2 |
| KEGG_OLFACTORY_TRANSDUCTION          | -<br>1.2<br>439<br>197<br>38 | 0.1460<br>87393 | OR8B8/OR1A1/OR8G1/OR5H2/OR51G2/OR5P3/OR56A4/OR56A1/OR2M5/OR2F2/OR4C11/OR6C6/OR14A16/O<br>R5D16/OR4M2/OR2G6/OR10AG1/OR51B6/OR56A3/OR51B2/OR10S1/OR51A7/OR51F2/OR5P2/OR4K14/OR4D<br>2/OR10C1/OR4F4/OR7D2/OR52J3/OR10A5/OR2Y1/OR6K3/OR8D1/OR1D2/OR7C2/OR4D1/OR10G4/OR6C3/O<br>R10A2/CALM1/OR13J1/CNGA4/PDC/OR10H3/OR2T1/OR4P4/OR2G3/OR2T12/OR10T2/OR5AS1/OR5T2/OR1S1<br>/OR5A2/OR4D6/OR4C13/OR51D1/OR10A6/OR8H2/OR8H3/OR5T3/OR5M1/OR2W1/OR6K2/OR51S1/OR10J5/O                                                                                                                                                                                                                                                                                                                                                                                                                                                                                                                                                                                                                                                                                                                                                                                                                                                                                                                                                            |



|                                                               |                              |                 |                                                                                                                                                                                                                                                                                                                                                                                                                                                                                                                                                                                                                                                                                                                                                                                                                                                                               |
|---------------------------------------------------------------|------------------------------|-----------------|-------------------------------------------------------------------------------------------------------------------------------------------------------------------------------------------------------------------------------------------------------------------------------------------------------------------------------------------------------------------------------------------------------------------------------------------------------------------------------------------------------------------------------------------------------------------------------------------------------------------------------------------------------------------------------------------------------------------------------------------------------------------------------------------------------------------------------------------------------------------------------|
|                                                               |                              |                 | R5T1/OR1B1/OR9G4/OR10A7/OR5B17/OR11G2/OR4N5/OR11L1/OR6B1/OR14C36/OR6F1/OR1D4/OR13C3/OR52A5/OR5K1/OR6C70/OR2V2/OR51I1/OR2A1/OR1G1/PRKX/OR51B5/OR51G1/OR8H1/OR1S2/OR51V1/OR5AP2/OR5AN1/OR10V1/OR4K13/OR2M7/OR6X1/OR8K5/OR5A1/OR2M2/OR9G1/OR2T10/OR13C4/OR52E6/OR4K17/OR13C8/OR4F15/OR7G2/OR10J1/OR4K5/OR1C1/OR11H1/OR6V1/OR1L4/OR51Q1/OR52H1/OR52D1/OR2A7/OR6C74/OR2A14/OR13H1/OR4L1/OR4X2/OR5J2/OR2T6/OR10G8/OR14J1/OR2S2/OR7G1/OR13F1/OR13D1/OR51M1/OR2M3/OR13C2/OR4A16/GUCA1B/OR8B12/OR4C45/OR13C9/OR2A5/OR8A1/OR51I2/OR2A42/OR5B12/CALM3/OR2W3/OR6M1/OR2B2/OR2AG2/OR13C5/OR4F5/OR5C1/GUCA1A/OR6T1/OR1L6/OR12D2/OR2A4/OR1N2/OR11A1/OR2C1/OR5K2/OR4A47/OR7A5/OR13A1/OR2D2/OR5AC2/CALM2/PRKACB/CALML3/CAMK2G/OR5AK2/OR2T33/OR2H1/OR2T4/OR1E1/OR2K2/OR2L3/OR2J2/OR4F6/GNAL/OR4K1/OR2T8/OR1F1/OR4K2/OR6B3/OR10H5/CNGB1/OR10Q1/OR9A2/CAMK2A/OR2L2/OR14I1/CLCA4/OR2L13/OR4N2/PRKG2 |
| REACTOME_SELECTIVE_AUTOPHAGY                                  | -<br>1.2<br>525<br>066<br>47 | 0.2571<br>70898 | CSNK2B/PRKAB2/PEX5/DYNC1LI1/TUBA1B/ATG12/UBA52/MAP1LC3A/TUBB2A/PRKAG1/TUBB2B/FUNDC1/TOMM20/TUBA4B/PRKAG2/P GAM5/RPS27A/MAP1LC3B/TUBA4A/TUBAL3/UBB/PARK7/TUBB3/TUBA3C/TOMM5/UBE2N/DYNLL1/CFTR/TOMM22/TUBA8/TUBA1A/DYNC111/TUBB4A                                                                                                                                                                                                                                                                                                                                                                                                                                                                                                                                                                                                                                               |
| REACTOME_RHO_GTPASE_EFFECTORS                                 | -<br>1.2<br>585<br>493<br>03 | 0.1233<br>22248 | PPP1R12B/SEC13/CENPA/CENPS/MAPK3/DYNC1LI1/PPP1CC/ARPC3/H4C12/EVL/ARPC4/H2BC8/H3C13/CENPK/TUBA1B/MYL12B/H2AC19/PLK1/PPP2CB/CENPU/PPP2R5B/PPP2CA/TUBB2A/H4C6/TUBB2B/H4-16/DLG4/NOX1/KDM1A/CENPM/H2AC6/TUBA4B/H3C12/PPP2R5A/H2BU1/BRK1/CDH1/RPS27/CDKN1B/SGO1/CDC25C/PMF1/NUF2/H2BC21/ITGB3BP/RHOC/H2BC15/MYL6/H3-3A/H2AX/H2BC6/H3C4/TUBA4A/CENPH/YWHAQ/TUBAL3/H3C7/H2AZ1/SKA2/PRKCB/AURKB/SPC24/TUBB3/H2BC4/TUBA3C/CENPQ/YWHAE/H2BC9/NSL1/H2BC7/PIN1/H3C1/DYNLL1/H2AC7/CIT/NOXO1/SPC25/CYFIP2/H2AC20/CFTR/H4C8/H4C11/H4C15/RTKN/BIRC5/MAD2L1/H2BC13/LIN7B/H2BC14/TUBA8/H2AC14/H2AC4/H3C15/CLASP2/H4C5/NOX3/H2AC8/H4C4/PAK3/TUBA1A/H4C1/H4C2/H2AB1/PPP1R14A/H2BC3/WASF1/PFN2/H2BC10/H4C3/H3C11/PRKCZ/DYNC111/H4C13/KIF5A/TUBB4A                                                                                                                                                  |
| REACTOME_SWITCHING_OF_ORIGINS_TO_A_PO<br>ST_REPLICATIVE_STATE | -<br>1.2<br>606<br>085<br>84 | 0.2294<br>60505 | PSMA1/PSMD3/PSMD6/PSMC3/PSMD9/PSMA4/PSMD4/CCNA2/ANAPC5/UBA52/ANAPC16/ANAPC10/PSMC6/PSMB7/PSMA5/PSMD14/PSMB5/PSMB4/RPS27A/ORC6/PSMB6/PSMD8/PSMA6/PSMA7/PSMD13/ORC4/UBE2E1/PSMB1/UBB/PSMA2/PSMD10/UBE2C/SKP1/PSMB3/UBE2S/ANAPC15/ANAPC11/RBX1                                                                                                                                                                                                                                                                                                                                                                                                                                                                                                                                                                                                                                   |
| REACTOME_CHROMATIN_MODIFYING_ENZYMES                          | -<br>1.2<br>629              | 0.1259<br>11878 | ING3/RUVBL2/COPRS/BRWD1/KAT2B/H4C12/H2BC8/SMARCE1/H3C13/HDAC2/MCRS1/H2AC19/RPS2/SAP18/KDM4D/PADI1/H4C6/SUPT3H/MORF4L2/H4-16/SGF29/KDM1A/PRMT3/KDM5B/H2AC6/MORF4L1/TAF9/H3C12/H2BU1/SMARCB1/H2AC16/ACTL6A/ELP6/H2BC21/SMARCD3/H2AC17/H2BC15/SMYD3/H2AX/H2BC6/SUV39H2/H3C4/TADA1/H3C7/PRMT1/H2AZ1/ELP5/                                                                                                                                                                                                                                                                                                                                                                                                                                                                                                                                                                         |

|                                                        |                              |                 |                                                                                                                                                                                                                                                                                                                                        |
|--------------------------------------------------------|------------------------------|-----------------|----------------------------------------------------------------------------------------------------------------------------------------------------------------------------------------------------------------------------------------------------------------------------------------------------------------------------------------|
|                                                        | 525<br>6                     |                 | H2BC4/VPS72/DPY30/H2BC9/H2BC7/KANSL2/H3C1/H2AC7/JADE3/H2AC20/CCND1/H4C8/H4C11/H4C15/ING4/H2BC13/H2AC12/H2BC14/H2AC21/H2AC14/H2AC4/H3C15/H4C5/H2AC8/H4C4/H4C1/H4C2/H2AB1/H2BC3/H2AW/H2BC10/YEATS4/H4C3/H3C11/ACTL6B/H4C13/CDK4                                                                                                          |
| REACTOME_COPI_DEPENDENT_GOLGI_TO_ER_RETROGRADE_TRAFFIC | -<br>1.2<br>672<br>896<br>35 | 0.2186<br>95376 | TUBA1B/ARF5/TUBB2A/KIF3C/TUBB2B/COPZ1/KIF22/TUBA4B/NSF/USE1/KIF21A/COPE/TUBA4A/TUBAL3/KIF3A/KIF25/TUBB3/TUBA3C/KIF9/BNIP1/KIF1A/TUBA8/KIF26A/NAPB/TUBA1A/KIF21B/KIF19/KIF12/KIF5A/TUBB4A                                                                                                                                               |
| REACTOME_CLASS_B_2_SECRETIN_FAMILY_RECEPTORS_          | -<br>1.2<br>724<br>225<br>47 | 0.2055<br>33597 | UCN3/RAMP2/CALCB/GNG7/WNT7A/IAPP/RAMP1/FZD9/IHH/WNT8A/GIPR/VIPR1/ADCYAP1/WNT7B/PTH2/GNG2/CALCRL/WNT6/CRHR2/PTH2R/GHRH/GNG4/GNG8/CRHBP/GLP2R/WNT10B/GNG13/VIPR2/CRHR1/GNG3/VIP/GLP1R                                                                                                                                                    |
| REACTOME_NEGATIVE_REGULATION_OF_FGFR3_SIGNALING        | -<br>1.2<br>766<br>782<br>38 | 0.2953<br>48907 | UBA52/PPP2CB/PPP2CA/FGF20/FRS2/RPS27A/FGF4/UBB/FGF23/FGF16/FGF8/FGF9/FGF17                                                                                                                                                                                                                                                             |
| REACTOME_DEGRADATION_OF_AXIN                           | -<br>1.2<br>771<br>736<br>75 | 0.2733<br>89356 | PSMB2/PSMA1/PSMD3/PSMD6/PSMC3/PSMD9/PSMA4/PSMD4/UBA52/PSMC6/PSMB7/PSMA5/PSMD14/PSMB5/PSMB4/RPS27A/PSMB6/PSMD8/PSMA6/PSMA7/PSMD13/PSMB1/UBB/PSMA2/PSMD10/PSMB3                                                                                                                                                                          |
| REACTOME_CELLULAR_SENESCENCE                           | -<br>1.2<br>816<br>665<br>22 | 0.1424<br>44123 | CDKN1B/ASF1A/RPS27A/H2BC21/H1-1/H2BC15/H3-3A/H2AX/H1-2/UBE2E1/H2BC6/H3C4/H3C7/TERF2IP/H2AZ1/UBB/CBX8/BMI1/H2BC4/MAPK8/H2BC9/CBX2/H2BC7/H3C1/H2AC7/UBE2C/UBE2S/ANAPC15/H1-3/MAPK10/ANAPC11/H2AC20/H4C8/H4C11/H4C15/CDKN2D/H2BC13/H1-4/H2BC14/H2AC14/H2AC4/H3C15/H4C5/H2AC8/H4C4/H4C1/H4C2/H2AB1/H2BC3/H1-5/H2BC10/H4C3/H3C11/H4C13/CDK4 |
| KEGG_RNA_POLYMERASE                                    | -<br>1.2<br>818<br>068<br>87 | 0.2838<br>42795 | POLR1D/POLR2E/POLR1E/POLR3B/POLR3GL/POLR2D/POLR2H/POLR3F/POLR1C/POLR3G/POLR2C/POLR2L/POLR2J/POLR3H/POLR2K/POLR2I/ZNRD1/POLR3K/POLR2G/POLR2F                                                                                                                                                                                            |

|                                                                           |                              |                 |                                                                                                                                                                                                                                                                   |
|---------------------------------------------------------------------------|------------------------------|-----------------|-------------------------------------------------------------------------------------------------------------------------------------------------------------------------------------------------------------------------------------------------------------------|
| KEGG_PENTOSE_AND_GLUCURONATE_INTERCONVERSIONS                             | -<br>1.2<br>849<br>795<br>9  | 0.2800<br>88109 | DCXR/UGT2B28/CRYL1/UGT2B15/UGT2B17/UGT2B7                                                                                                                                                                                                                         |
| REACTOME_INTRAFLAGELLAR_TRANSPORT                                         | -<br>1.2<br>877<br>509<br>76 | 0.2640<br>69264 | TUBA1B/IFT27/TUBB2A/KIF3C/TUBB2B/TCTEX1D2/IFT43/DYNLRB1/IFT52/IFT20/TUBA4A/KIF3A/TUBB3/TUBA3C/DYNLL1/DYNLRB2/IFT46/KIF17/TCTEX1D1/TUBA1A/TUBB4A                                                                                                                   |
| KEGG_ALANINE_ASPARTATE_AND_Glutamate_Metabolism                           | -<br>1.2<br>947<br>550<br>31 | 0.2895<br>29418 | CPS1/ALDH5A1/ADSL/GOT2/NIT2/GPT2/GPT/ABAT/GLUD1/GOT1/ACY3/GAD1/GLS2/ASPA/GAD2/AGXT2                                                                                                                                                                               |
| REACTOME_RNA_POLYMERASE_III_TRANSCRIPTION_INITIATION_FROM_TYPE_1_PROMOTER | -<br>1.2<br>951<br>007<br>71 | 0.2681<br>47357 | POLR1D/POLR2E/POLR3B/POLR3GL/POLR2H/POLR3F/POLR1C/GTF3C5/GTF3C6/POLR3G/POLR2L/POLR3H/POLR2K/GTF3A/POLR3K/POLR2F                                                                                                                                                   |
| REACTOME_FGFR2_ALTERNATIVE_SPLICING                                       | -<br>1.2<br>958<br>981<br>73 | 0.2734<br>59775 | POLR2C/POLR2L/POLR2J/POLR2K/FGFR2/POLR2I/POLR2G/POLR2F/ESRP1                                                                                                                                                                                                      |
| REACTOME_PROTEIN_METHYLATION                                              | -<br>1.2<br>960<br>076<br>55 | 0.2985<br>90691 | CAMKMT/EEF2KMT/CALM1/HSPA8/ETFB/ETFBKMT/METTL21A/METTL22/RPS2/EEF1AKMT2/PRMT3/EEF1A1/EEF1AKMT1                                                                                                                                                                    |
| REACTOME_MITOTIC_SPINDLE_CHECKPOINT                                       | -<br>1.2<br>983              | 0.1872<br>60751 | CDC26/CENPT/PPP2R1A/NUP37/CDCA8/KNL1/KIF2C/BUB3/RANGAP1/ANAPC7/KIF2B/DYNC1I2/CENPN/MIS12/CENPL/B9D2/SEC13/CENPA/CENPS/DYNC1L1/PPP1CC/CENPK/PLK1/ANAPC5/PPP2CB/CENPU/PPP2R5B/ANAPC16/PPP2CA/ANAPC10/CENPM/PPP2R5A/RPS27/SGO1/PMF1/NUF2/ITGB3BP/UBE2E1/CENPH/SKA2/A |

|                                                                    |                              |                 |                                                                                                                                                                                                                                                                                                                                                     |
|--------------------------------------------------------------------|------------------------------|-----------------|-----------------------------------------------------------------------------------------------------------------------------------------------------------------------------------------------------------------------------------------------------------------------------------------------------------------------------------------------------|
|                                                                    | 532<br>02                    |                 | URKB/SPC24/CENPQ/NSL1/DYNLL1/UBE2C/SPC25/UBE2S/ANAPC15/ANAPC11/BIRC5/MAD2L1/CLASP2/DY<br>NC111                                                                                                                                                                                                                                                      |
| REACTOME_ION_CHANNEL_TRANSPORT                                     | -<br>1.2<br>998<br>889<br>82 | 0.1330<br>89573 | CUTC/ATP10B/ATP1A4/ATP6V1E1/TRPC3/PDZD11/UBB/FXYD3/SRI/TTYH1/CLCN4/FXYD1/CASQ1/FKBP1B/B<br>EST1/UNC79/ATP6V0B/TTYH2/TRPC5/ATP6V1F/CAMK2G/ATP1B1/UNC80/ASIC2/SGK2/ASIC1/ATP2B2/ATP4<br>A/ATP2C2/ATP8A1/NALCN/BEST3/FXYD2/TRPV6/TRDN/FXYD6/WNK2/ASIC4/FXYD7/TRPM1/SLN/ATP8A2/AT<br>P6V1G2/CAMK2A/ANO3/ATP1A3/RYR2/ATP13A5/ATP2B3/CLCA4/FXYD4/ATP6V0A4 |
| REACTOME_DEFECTIVE_CFTR_CAUSES_CYSTIC<br>_FIBROSIS                 | -<br>1.3<br>034<br>049<br>68 | 0.2193<br>89212 | PSMA1/PSMD3/PSMD6/PSMC3/PSMD9/PSMA4/PSMD4/UBA52/PSMC6/PSMB7/PSMA5/PSMD14/PSMB5/PSM<br>B4/RPS27A/PSMB6/PSMD8/PSMA6/PSMA7/PSMD13/PSMB1/UBB/PSMA2/PSMD10/PSMB3/RNF5/CFTR/OS9                                                                                                                                                                           |
| WP_MAP3K1_ROLE_IN_PROMOTING_AND_BLOCK<br>ING_GONADAL_DETERMINATION | -<br>1.3<br>035<br>608<br>89 | 0.2895<br>29418 | FRAT1/SRY/FGFR2/FGF9/GADD45G                                                                                                                                                                                                                                                                                                                        |
| REACTOME_UCH_PROTEINASES                                           | -<br>1.3<br>049<br>300<br>69 | 0.1839<br>0538  | PSMA1/INO80E/PSMD3/TFPT/PSMD6/PSMC3/ACTR5/PSMD9/RUVBL1/PSMA4/PSMD4/MCRS1/H2AC19/INO80<br>C/UBA52/UCHL3/PSMC6/PSMB7/PSMA5/H2AC6/PSMD14/SEN8/NEDD8/PSMB5/PSMB4/RPS27A/H2AC16/PS<br>MB6/PSMD8/ACTL6A/PSMA6/PSMA7/H2AC17/PSMD13/PSMB1/UBB/PSMA2/PSMD10/H2AC7/PSMB3/H2AC20/<br>H2AC12/H2AC21/H2AC14/H2AC4/UCHL1/H2AC8/H2AW                               |
| REACTOME_SIGNALING_BY_FGFR2                                        | -<br>1.3<br>056<br>542<br>5  | 0.1932<br>04647 | UBA52/POLR2C/PPP2CB/PPP2CA/FGF22/FGF20/POLR2L/POLR2J/FRS2/RPS27A/FRS3/FGFBP3/FGF4/UBB/P<br>OLR2K/FGFR2/POLR2I/FGF23/POLR2G/FGF16/FGFBP2/FGF8/FGF9/FGF3/FGF17/POLR2F/ESRP1                                                                                                                                                                           |
| REACTOME_Glutamate_and_Glutamine_Met<br>abolism                    | -<br>1.3<br>090<br>436<br>55 | 0.2895<br>29418 | OAT/PYCR3/GOT2/PYCR1/KYAT1/GLUD1/RIMKLA/GLS2                                                                                                                                                                                                                                                                                                        |

|                                                                               |                              |                 |                                                                                                                                                                                                                                                                                                             |
|-------------------------------------------------------------------------------|------------------------------|-----------------|-------------------------------------------------------------------------------------------------------------------------------------------------------------------------------------------------------------------------------------------------------------------------------------------------------------|
| REACTOME_RESOLUTION_OF_SISTER_CHROMATID_COHESION                              | -<br>1.3<br>116<br>268<br>95 | 0.1601<br>80447 | CENPL/B9D2/SEC13/CENPA/CENPS/DYNC1LI1/PPP1CC/CENPK/TUBA1B/RAD21/PLK1/PPP2CB/CENPU/PPP2R5B/CCNB1/PPP2CA/TUBB2A/CDK1/TUBB2B/CENPM/TUBA4B/CCNB2/PPP2R5A/RPS27/SGO1/PMF1/NUF2/ITGB3BP/TUBA4A/CENPH/TUBAL3/SKA2/AURKB/SPC24/TUBB3/TUBA3C/CENPQ/NSL1/DYNLL1/SPC25/BIRC5/MAD2L1/TUBA8/CLASP2/TUBA1A/DYNC111/TUBB4A |
| WP_ENDOTHELIN_PATHWAYS                                                        | -<br>1.3<br>124<br>313<br>26 | 0.2693<br>69865 | RAMP1/CALM2/GNAI1/CALCRL/PLCB1/NPY1R/RIIAD1/MYL1/GNG13/NPY                                                                                                                                                                                                                                                  |
| WP_FATTY_ACID_OMEGA_OXIDATION                                                 | -<br>1.3<br>165<br>875<br>12 | 0.2895<br>29418 | ALDH2/CYP2E1/CYP2A6/ADH7/CYP4A11/ADH1B                                                                                                                                                                                                                                                                      |
| REACTOME_SYNTHESIS_OF_BILE_ACIDS_AND_BILE_SALTS_VIA_7ALPHA_HYDROXYCHOLESTEROL | -<br>1.3<br>182<br>254<br>81 | 0.2815<br>993   | BAAT/NR1H4/AKR1C3/AKR1C4/AKR1C2/AKR1C1                                                                                                                                                                                                                                                                      |
| BIOCARTA_NKCELLS_PATHWAY                                                      | -<br>1.3<br>186<br>488<br>66 | 0.2818<br>66472 | KLRC4/KLRC3/KLRC2                                                                                                                                                                                                                                                                                           |
| REACTOME_CLASS_C_3_METABOTROPIC_GLUTAMATE_PHEROMONE_RECEPTORS_                | -<br>1.3<br>215<br>142<br>84 | 0.2669<br>05921 | TAS2R46/TAS2R14/TAS2R3/TAS2R9/TAS2R30/GABBR1/GRM3/GRM2/TAS2R13/GRM5/GRM4/GABBR2/GRM7                                                                                                                                                                                                                        |
| REACTOME_PHOSPHOLIPASE_C_MEDIATED_CASCADE_FGFR4                               | -<br>1.3<br>219              | 0.2874<br>48016 | FGFR4/FGF4/FGF23/FGF16/KLB/FGF8/FGF9/FGF17                                                                                                                                                                                                                                                                  |

|                                                                           |                              |                 |                                                                                                                                                                                                                                                                             |
|---------------------------------------------------------------------------|------------------------------|-----------------|-----------------------------------------------------------------------------------------------------------------------------------------------------------------------------------------------------------------------------------------------------------------------------|
|                                                                           | 661<br>51                    |                 |                                                                                                                                                                                                                                                                             |
| REACTOME_FORMATION_OF_THE_EARLY_ELONGATION_COMPLEX                        | -<br>1.3<br>234<br>378<br>61 | 0.2578<br>34938 | POLR2C/POLR2L/POLR2J/CCNH/GTF2H5/NELFE/POLR2K/POLR2I/SUPT4H1/POLR2G/POLR2F                                                                                                                                                                                                  |
| REACTOME_ABERRANT_REGULATION_OF_MITOTIC_EXIT_IN_CANCER_DUE_TO_RB1_DEFECTS | -<br>1.3<br>235<br>946<br>81 | 0.2804<br>5977  | ANAPC5/ANAPC16/ANAPC10/UBE2E1/UBE2C/UBE2S/ANAPC15/ANAPC11                                                                                                                                                                                                                   |
| REACTOME_CA_DEPENDENT_EVENTS                                              | -<br>1.3<br>236<br>150<br>34 | 0.2600<br>57909 | PRKAR1B/PRKACB/CAMK2G/ADCY2/CAMKK1/ADCY5/PDE1A/CAMK2A/PRKCG                                                                                                                                                                                                                 |
| REACTOME_GOLGI_TO_ER_RETROGRADE_TRANSPORT                                 | -<br>1.3<br>237<br>569<br>82 | 0.1523<br>66812 | PLA2G4A/TUBA1B/ARF5/ACTR10/PLA2G6/TUBB2A/KIF3C/TUBB2B/COPZ1/KIF22/RAB18/TUBA4B/NSF/USE1/KIF21A/COPE/ACTR1A/TUBA4A/TUBAL3/KIF3A/KIF25/TUBB3/TUBA3C/DCTN6/KIF9/DYNLL1/BNIP1/PAFAH1B3/RAB6B/KIF1A/DCTN2/TUBA8/KIF26A/DCTN3/NAPB/TUBA1A/KIF21B/KIF19/KIF12/DYNC111/KIF5A/TUBB4A |
| WP_STEROID_BIOSYNTHESIS                                                   | -<br>1.3<br>242<br>469<br>59 | 0.2769<br>43412 | HSD17B3/HSD3B1/CPN1/CYP17A1/F13B                                                                                                                                                                                                                                            |
| KEGG_TERPENOID_BACKBONE_BIOSYNTHESIS                                      | -<br>1.3<br>293<br>246<br>59 | 0.2824<br>85652 | GGPS1/PMVK/MVK/HMGCS1/ACAT1/FDPS/HMGCR/ACAT2/IDI1/PDSS1/IDI2/HMGCS2                                                                                                                                                                                                         |

|                                                         |                              |                 |                                                                                                                                                                                                                                                                                                                                                                                                                                                                                                                                                                                                       |
|---------------------------------------------------------|------------------------------|-----------------|-------------------------------------------------------------------------------------------------------------------------------------------------------------------------------------------------------------------------------------------------------------------------------------------------------------------------------------------------------------------------------------------------------------------------------------------------------------------------------------------------------------------------------------------------------------------------------------------------------|
| REACTOME_SIGNALING_BY_WNT                               | -<br>1.3<br>304<br>403<br>78 | 0.0476<br>88383 | PSMB7/FRAT1/PSMA5/H2AC6/SFRP1/H3C12/TLE5/PPP2R5A/CLTA/PSMD14/CBY1/H2BU1/PSMB5/PSMB4/RP<br>S27A/CSNK1E/PSMB6/PSMD8/PSMA6/H2BC21/PSMA7/SRY/PSMD13/H2BC15/H3-<br>3A/H2AX/PSMB1/H2BC6/H3C4/H3C7/H2AZ1/PRKCB/UBB/PPP3CB/VPS29/H2BC4/GNG7/WNT7A/RSPO2/PSM<br>A2/PSMD10/GNAO1/H2BC9/H2BC7/H3C1/PIP5K1B/H2AC7/SKP1/LGR6/PSMB3/WNT8A/PDE6A/SOX6/H2AC20/<br>RBX1/H4C8/H4C11/H4C15/WNT7B/SOX3/H2BC13/GNG2/H2BC14/PARD6A/H2AC14/WNT6/H2AC4/PLCB1/H3C<br>15/HECW1/H4C5/RAC3/H2AC8/H4C4/GNG4/GNG8/RSPO3/SOX4/H4C1/CXXC4/H4C2/H2AB1/H2BC3/H2BC10/<br>WNT10B/GNG13/H4C3/H3C11/LGR5/GNG3/CAMK2A/H4C13/PRKCG/WIF1/PRKG2 |
| REACTOME_ESTROGEN_DEPENDENT_GENE_EX<br>PRESSION         | -<br>1.3<br>323<br>357<br>11 | 0.1192<br>0368  | KANK1/RAD21/H2AC19/EBAG9/POLR2C/FKBP4/USF1/H4C6/PTGES3/H4-<br>16/POLR2L/KDM1A/POLR2J/H2AC6/H3C12/KCTD6/H2BU1/TGFA/ERBB4/H2BC21/H2BC15/H3-<br>3A/H2AX/H2BC6/H3C4/H3C7/PRMT1/H2AZ1/H2BC4/POLR2K/POLR2I/H2BC9/GTF2A2/H2BC7/MYB/H3C1/H2A<br>C7/PGR/POLR2G/H2AC20/CCND1/H4C8/H4C11/H4C15/H2BC13/H2BC14/H2AC14/H2AC4/H3C15/H4C5/H2AC8<br>/H4C4/H4C1/H4C2/H2AB1/H2BC3/H2BC10/H4C3/H3C11/H4C13/POLR2F                                                                                                                                                                                                         |
| REACTOME_RNA_POLYMERASE_III_CHAIN_ELON<br>GATION        | -<br>1.3<br>335<br>824<br>24 | 0.2571<br>70898 | POLR1D/POLR2E/POLR3B/POLR3GL/POLR2H/POLR3F/POLR1C/POLR3G/POLR2L/POLR3H/POLR2K/POLR3<br>K/POLR2F                                                                                                                                                                                                                                                                                                                                                                                                                                                                                                       |
| REACTOME_DISEASES_OF_MITOTIC_CELL_CYCL<br>E             | -<br>1.3<br>340<br>358<br>17 | 0.2280<br>92883 | ANAPC5/ANAPC16/E2F2/ANAPC10/CDKN1B/UBE2E1/UBE2C/UBE2S/ANAPC15/ANAPC11/CCND1/CDKN1C/C<br>DK4                                                                                                                                                                                                                                                                                                                                                                                                                                                                                                           |
| REACTOME_TCF_DEPENDENT_SIGNALING_IN_RE<br>SPONSE_TO_WNT | -<br>1.3<br>349<br>986<br>96 | 0.0699<br>16397 | H2AC19/UBA52/PPP2CB/PPP2R5B/PPP2CA/H4C6/H4-<br>16/PSMC6/CTNNBIP1/WNT3/PSMB7/FRAT1/PSMA5/H2AC6/SFRP1/H3C12/PPP2R5A/PSMD14/CBY1/H2BU1/P<br>SMB5/PSMB4/RPS27A/CSNK1E/PSMB6/PSMD8/PSMA6/H2BC21/PSMA7/SRY/PSMD13/H2BC15/H3-<br>3A/H2AX/PSMB1/H2BC6/H3C4/H3C7/H2AZ1/UBB/H2BC4/RSPO2/PSMA2/PSMD10/H2BC9/H2BC7/H3C1/PIP5K<br>1B/H2AC7/LGR6/PSMB3/WNT8A/SOX6/H2AC20/RBX1/H4C8/H4C11/H4C15/SOX3/H2BC13/H2BC14/H2AC14/H<br>2AC4/H3C15/HECW1/H4C5/H2AC8/H4C4/RSPO3/SOX4/H4C1/CXXC4/H4C2/H2AB1/H2BC3/H2BC10/H4C3/H3C<br>11/LGR5/H4C13/WIF1                                                                         |
| KEGG_METABOLISM_OF_XENOBIOTICS_BY_CYT<br>OCHROME_P450   | -<br>1.3<br>354              | 0.1643<br>1522  | GSTA1/CYP3A43/CYP2E1/GSTO1/MGST3/UGT2B28/CYP2C8/GSTT2/GSTA4/GSTM3/UGT2B15/CYP2C18/UGT<br>2B17/ADH7/AKR1C3/AKR1C4/AKR1C2/AKR1C1/UGT2B7/ADH1B                                                                                                                                                                                                                                                                                                                                                                                                                                                           |

|                                                                                                                                      |                              |                 |                                                                  |
|--------------------------------------------------------------------------------------------------------------------------------------|------------------------------|-----------------|------------------------------------------------------------------|
|                                                                                                                                      | 199<br>7                     |                 |                                                                  |
| WP_DOPAMINERGIC_NEUROGENESIS                                                                                                         | -<br>1.3<br>382<br>695<br>8  | 0.2319<br>9704  | NEUROG2/GBX2/OTX2/TH/RET/CDKN1C/ASCL1/FGF8/LMX1B/NKX2-2/LMX1A    |
| REACTOME_INHIBITION_OF_THE_PROTEOLYTIC_ACTIVITY_OF_APC_C_REQUIRED_FOR_THE_ONSET_OF_ANAPHASE_BY_MITOTIC_SPINDLE_CHECKPOINT_COMPONENTS | -<br>1.3<br>385<br>813<br>48 | 0.2806<br>2499  | ANAPC5/ANAPC16/ANAPC10/UBE2E1/UBE2C/UBE2S/ANAPC15/ANAPC11/MAD2L1 |
| REACTOME_SYNTHESIS_OF_PYROPHOSPHATES_IN_THE_CYTOSOL                                                                                  | -<br>1.3<br>385<br>944<br>87 | 0.2733<br>5524  | ITPK1/NUDT4/NUDT10/IP6K3/NUDT11                                  |
| REACTOME_PI_3K_CASCADE_FGFR4                                                                                                         | -<br>1.3<br>395<br>348<br>87 | 0.2655<br>21581 | FGF20/FRS2/FGFR4/FGF4/FGF23/FGF16/KLB/FGF8/FGF9/FGF17            |
| REACTOME_TANDEM_PORE_DOMAIN_POTASSIUM_CHANNELS                                                                                       | -<br>1.3<br>397<br>331<br>92 | 0.2746<br>6595  | KCNK18/KCNK10/KCNK7/KCNK2/KCNK4/KCNK9/KCNK3/KCNK1                |
| BIOCARTA_MPR_PATHWAY                                                                                                                 | -<br>1.3<br>408<br>310<br>58 | 0.2755<br>85279 | HRAS/MAPK3/CCNB1/CDK1/CDC25C/PIN1/PGR/PRKAR1B/PRKACB/MYT1        |



|                                                                           |                              |                 |                                                                                                                                                                                                                                                                                                                                                                                                                                                                                                                                                                                                                        |
|---------------------------------------------------------------------------|------------------------------|-----------------|------------------------------------------------------------------------------------------------------------------------------------------------------------------------------------------------------------------------------------------------------------------------------------------------------------------------------------------------------------------------------------------------------------------------------------------------------------------------------------------------------------------------------------------------------------------------------------------------------------------------|
| REACTOME_GLUCAGON_SIGNALING_IN_METABOLIC_REGULATION                       | -<br>1.3<br>418<br>581<br>41 | 0.2375<br>54867 | GNG7/PRKAR1B/PRKACB/ADCY2/GNG2/GNG4/GNG8/ADCY5/GNG13/GNG3                                                                                                                                                                                                                                                                                                                                                                                                                                                                                                                                                              |
| REACTOME_CYCLIN_A_B1_B2_ASSOCIATED_EVENTS_DURING_G2_M_TRANSITION          | -<br>1.3<br>425<br>487<br>65 | 0.2245<br>06384 | MNAT1/CCNA2/PLK1/PPP2CB/CCNB1/PPP2CA/CDK1/PKMYT1/CCNB2/LCMT1/CDC25A/PPP2R2A/CDC25C/CNH/PPP2R3B                                                                                                                                                                                                                                                                                                                                                                                                                                                                                                                         |
| REACTOME_PHASE_4_RESTING_MEMBRANE_POTENTIAL                               | -<br>1.3<br>425<br>703<br>93 | 0.2631<br>7148  | KCNK7/KCNK2/KCNJ4/KCNK4/KCNK9/KCNK3/KCNJ12/KCNK1/KCNK12                                                                                                                                                                                                                                                                                                                                                                                                                                                                                                                                                                |
| REACTOME_MITOTIC_METAPHASE_AND_ANAPHASE                                   | -<br>1.3<br>426<br>575<br>63 | 0.0728<br>41396 | VRK1/PSMD3/PSMD6/PSMC3/CENPN/UBE2I/VPS4A/TUBB4B/MIS12/PSMD9/CENPL/B9D2/PSMA4/PSMD4/SEC13/CENPA/CENPS/DYNC1LI1/PPP1CC/TMPO/CENPK/TUBA1B/RAD21/PLK1/ANAPC5/UBA52/PPP2CB/CENPU/SPAST/PPP2R5B/CCNB1/ANAPC16/PPP2CA/TUBB2A/CHMP6/ANAPC10/CDK1/TUBB2B/SUMO1/PSMC6/CENPM/PSMB7/PSMA5/TUBA4B/CCNB2/RAN/PPP2R5A/PSMD14/RPS27/PSMB5/PSMB4/SGO1/RPS27A/PSMB6/PPP2R2A/PSMD8/PTTG1/PSMA6/PMF1/NUF2/ITGB3BP/PSMA7/PSMD13/UBE2E1/PSMB1/TUBA4A/CENPH/TUBAL3/SKA2/UBB/AURKB/SPC24/TUBB3/TUBA3C/NUP35/PSMA2/PSMD10/CENPQ/NSL1/BANF1/DYNLL1/UBE2C/PSMB3/SPC25/UBE2S/ANAPC15/ANAPC11/BIRC5/MAD2L1/TUBA8/CLASP2/TUBA1A/SIRT2/DYNC111/TUBB4A |
| REACTOME_RNA_POLYMERASE_III_TRANSCRIPTION_INITIATION_FROM_TYPE_3_PROMOTER | -<br>1.3<br>433<br>325<br>05 | 0.2319<br>9704  | SNAPC1/POLR1D/POLR2E/POLR3B/POLR3GL/POLR2H/POLR3F/POLR1C/SNAPC5/SNAPC3/POLR3G/BRF2/POLR2L/POLR3H/POLR2K/POLR3K/POLR2F                                                                                                                                                                                                                                                                                                                                                                                                                                                                                                  |
| WP_GPCRS_CLASS_C_METABOTROPIC_Glutamate_Pheromone                         | -<br>1.3<br>446<br>202<br>7  | 0.2713<br>45012 | GABBR1/GRM3/GRM2/GRM5/GRM4/GABBR2/GRM7                                                                                                                                                                                                                                                                                                                                                                                                                                                                                                                                                                                 |

|                                                                   |                              |                 |                                                                                                                                                                                                                                                                                                                                                                                                                                                                                                                                       |
|-------------------------------------------------------------------|------------------------------|-----------------|---------------------------------------------------------------------------------------------------------------------------------------------------------------------------------------------------------------------------------------------------------------------------------------------------------------------------------------------------------------------------------------------------------------------------------------------------------------------------------------------------------------------------------------|
| REACTOME_G_ALPHA_S_SIGNALLING_EVENTS                              | -<br>1.3<br>463<br>838<br>2  | 0.0282<br>5041  | CALCB/GNG7/PDE3B/OR2A4/OR1N2/OR11A1/OR2C1/IAPP/HTR4/OR5K2/GPHB5/RAMP1/OR4A47/RLN2/OR7A5/OR13A1/OR2D2/RTP2/OR5AC2/GIPR/OR5AK2/ADCY2/VIPR1/RTP1/MC5R/GPR32/OR2T33/ADCYAP1/OR2H1/CGA/PDE10A/OR2T4/RXFP2/GPR150/FSHR/REEP1/OR1E1/PTH2/GNG2/OR2K2/NPS/GNAI1/AVP/CALCRL/TAAR6/OR2L3/OR2J2/FSHB/OR4F6/CRHR2/PTH2R/GNAL/GPR45/DRD1/OR4K1/GHRH/GPR27/GNG4/GNG8/OR2T8/NPSR1/OR1F1/OR4K2/OR6B3/GPHA2/OR10H5/GLP2R/HTR6/ADCY5/PDE1A/GNG13/OR10Q1/VIPR2/OR9A2/CRHR1/RXFP1/GNG3/PDE2A/VIP/RTP5/TSHR/MC4R/OR2L2/OR14I1/GPR83/DRD5/GLP1R/OR2L13/OR4N2 |
| BIOCARTA_SM_PATHWAY                                               | -<br>1.3<br>470<br>056<br>64 | 0.2605<br>61227 | SNRPB2/SNRPD1/SNRPF/SNRPB/SNRPC/SNRPD2/SNRPE/SNRPG                                                                                                                                                                                                                                                                                                                                                                                                                                                                                    |
| REACTOME_HSP90_CHAPERONE_CYCLE_FOR_STEROID_HORMONE_RECEPTORS_SHR_ | -<br>1.3<br>470<br>435<br>22 | 0.1835<br>43299 | TUBA1B/ACTR10/FKBP4/TUBB2A/PTGES3/TUBB2B/DNAJA2/TUBA4B/DNAJA4/ACTR1A/TUBA4A/TUBAL3/TUBB3/TUBA3C/DCTN6/DYNLL1/PGR/DCTN2/TUBA8/DCTN3/TUBA1A/DYNC111/TUBB4A                                                                                                                                                                                                                                                                                                                                                                              |
| REACTOME_PRESYNAPTIC_FUNCTION_OF_KAINATE_RECEPTORS                | -<br>1.3<br>493<br>527<br>1  | 0.2617<br>70736 | GNG2/PLCB1/GNG4/GNG8/GNG13/GNG3                                                                                                                                                                                                                                                                                                                                                                                                                                                                                                       |
| REACTOME_RECYCLING_PATHWAY_OF_L1                                  | -<br>1.3<br>523<br>180<br>35 | 0.1968<br>28558 | TUBA1B/TUBB2A/TUBB2B/TUBA4B/CLTA/RPS6KA5/TUBA4A/TUBAL3/TUBB3/TUBA3C/DNM1/SHTN1/TUBA8/TUBA1A/DNM3/L1CAM/SH3GL2/TUBB4A                                                                                                                                                                                                                                                                                                                                                                                                                  |
| BIOCARTA_PDZS_PATHWAY                                             | -<br>1.3<br>534<br>876<br>6  | 0.2419<br>14701 | GUK1/NFASC/NCAM1/DLG2/PCLO/GRIN1                                                                                                                                                                                                                                                                                                                                                                                                                                                                                                      |

|                                                                           |                              |                 |                                                                                                                                                                                                                                                                                                                                                                                                                                               |
|---------------------------------------------------------------------------|------------------------------|-----------------|-----------------------------------------------------------------------------------------------------------------------------------------------------------------------------------------------------------------------------------------------------------------------------------------------------------------------------------------------------------------------------------------------------------------------------------------------|
| PID_REELIN_PATHWAY                                                        | -<br>1.3<br>538<br>124<br>25 | 0.2213<br>32213 | MAPK8/CDK5/MAPT/GRIN2A/DAB1/CDK5R1/RELN/GRIN2B                                                                                                                                                                                                                                                                                                                                                                                                |
| REACTOME_PI_3K_CASCADE_FGFR2                                              | -<br>1.3<br>555<br>094<br>92 | 0.2439<br>41025 | FGF22/FGF20/FRS2/FGF4/FGFR2/FGF23/FGF16/FGF8/FGF9/FGF3/FGF17                                                                                                                                                                                                                                                                                                                                                                                  |
| WP_NONALCOHOLIC_FATTY_LIVER_DISEASE                                       | -<br>1.3<br>557<br>258<br>27 | 0.1111<br>91158 | NDUFS8/COX4I2/UQCRB/NDUFS7/PIK3R3/UQCRC1/COX6C/NDUFB2/SDHB/NDUFC1/NDUFS5/UQCR10/COX5A/NDUFB11/NDUFA8/NDUFS3/NDUFA1/MAPK8/UQCRC2/NDUFA6/NDUFV2/UQCRHL/CYP2E1/NDUFB3/NDUFS4/NDUFA9/UQCRFS1/COX7A2L/COX7C/COX6B1/COX8A/NDUFA7/NDUFA3/NDUFB10/NDUFA12/NDUFB4/NDUFC2/CYC1/COX4I1/UQCRH/ADIPOQ/NDUFB6/NDUFB8/NDUFB1/NDUFA13/DDIT3/UQCRQ/BID/NDUFAB1/COX5B/NDUFB5/NDUFA2/UQCR11/COX7B/NDUFA11/NDUFB7/NDUFB9/COX7B2/COX6A1/COX7A2/NDUFA4/NR1H4/COX6A2 |
| REACTOME_UPTAKE_AND_ACTIONS_OF_BACTERIAL_TOXINS                           | -<br>1.3<br>576<br>696<br>21 | 0.2055<br>33597 | SYT2/VAMP2/STX1A/SV2C/STX1B/SV2B/SYT1/SNAP25                                                                                                                                                                                                                                                                                                                                                                                                  |
| REACTOME_PKMTS_METHYLATE_HISTONE_LYSINES                                  | -<br>1.3<br>596<br>316<br>48 | 0.1495<br>36393 | SMYD3/SUV39H2/H3C4/H3C7/DPY30/H3C1/H4C8/H4C11/H4C15/H3C15/H4C5/H4C4/H4C1/H4C2/H4C3/H3C11/H4C13                                                                                                                                                                                                                                                                                                                                                |
| REACTOME_SYNTHESIS_OF_BILE_ACIDS_AND_BILE_SALTS_VIA_24_HYDROXYCHOLESTEROL | -<br>1.3<br>659<br>051<br>19 | 0.2463<br>33427 | SLC27A5/CYP46A1/AKR1C3/AKR1C4/AKR1C2/AKR1C1                                                                                                                                                                                                                                                                                                                                                                                                   |
| WP_RETT_SYNDROME_CAUSING_GENES                                            | -<br>1.3                     | 0.1636<br>16328 | KCNJ10/GNAO1/SRRM3/GRIN2A/SCN2A/GABRD/STXBP1/GABBR2/GRIN2B/ACTL6B/GABRA3                                                                                                                                                                                                                                                                                                                                                                      |

|                                                    |                              |                 |                                                                                                                                                                                                                                                                                                                                                                                                                                              |
|----------------------------------------------------|------------------------------|-----------------|----------------------------------------------------------------------------------------------------------------------------------------------------------------------------------------------------------------------------------------------------------------------------------------------------------------------------------------------------------------------------------------------------------------------------------------------|
|                                                    | 667<br>512<br>45             |                 |                                                                                                                                                                                                                                                                                                                                                                                                                                              |
| REACTOME_PHOSPHOLIPASE_C_MEDIATED_CASCADE_FGFR2    | -<br>1.3<br>711<br>647<br>38 | 0.2108<br>70873 | FGF4/FGFR2/FGF23/FGF16/FGF8/FGF9/FGF3/FGF17                                                                                                                                                                                                                                                                                                                                                                                                  |
| REACTOME_G2_M_DNA_DAMAGE_CHECKPOINT                | -<br>1.3<br>719<br>033<br>62 | 0.1156<br>17518 | YWHAH/RPA3/RPA2/H4C12/H2BC8/UBE2V2/CCNB1/H4C6/CDK1/SUMO1/H4-16/BABAM1/H2BU1/CDC25C/H2BC21/H2BC15/H2AX/H2BC6/YWHAQ/H2BC4/YWHAE/H2BC9/H2BC7/UBE2N/H4C8/H4C11/H4C15/H2BC13/H2BC14/H4C5/H4C4/H4C1/H4C2/H2BC3/H2BC10/H4C3/H4C13                                                                                                                                                                                                                   |
| REACTOME_SYNAPTIC_ADHESION_LIKE_MOLECULES          | -<br>1.3<br>734<br>130<br>82 | 0.2406<br>41902 | GRIA3/PTPRS/DLG4/PTPRD/RTN3/GRIA4/GRIN2A/LRFN2/GRIN2B/GRIN1                                                                                                                                                                                                                                                                                                                                                                                  |
| REACTOME_G2_M_CHECKPOINTS                          | -<br>1.3<br>743<br>623<br>94 | 0.0851<br>81586 | PSMD3/H4C14/PSMD6/PSMC3/CDC7/H2BC1/RFC3/PSMD9/YWHAH/PSMA4/PSMD4/RPA3/RPA2/H4C12/H2BC8/UBE2V2/UBA52/CDC45/CCNB1/H4C6/CDK1/PKMYT1/SUMO1/H4-16/PSMC6/MCM10/PSMB7/PSMA5/BABAM1/CCNB2/PSMD14/H2BU1/CDC25A/PSMB5/PSMB4/RPS27A/ORC6/PSMB6/PSMD8/CDC25C/PSMA6/H2BC21/PSMA7/PSMD13/H2BC15/ORC4/H2AX/PSMB1/H2BC6/YWHAQ/UBB/H2BC4/PSMA2/PSMD10/YWHAE/H2BC9/H2BC7/UBE2N/PSMB3/H4C8/H4C11/H4C15/H2BC13/H2BC14/H4C5/H4C4/H4C1/H4C2/H2BC3/H2BC10/H4C3/H4C13 |
| REACTOME_BBSOME_MEDIATED_CARGO_TARGETING_TO_CILIUM | -<br>1.3<br>761<br>414<br>02 | 0.2200<br>14282 | BBS4/BBS7/BBS12/CCT5/LZTFL1/CCT3/CCT4/BBIP1/MKKS/BBS10/ARL6/CCT2/RAB3IP/SSTR3                                                                                                                                                                                                                                                                                                                                                                |
| REACTOME_PI_3K_CASCADE_FGFR3                       | -<br>1.3<br>791              | 0.2108<br>70873 | FGF20/FRS2/FGF4/FGF23/FGF16/FGF8/FGF9/FGF17                                                                                                                                                                                                                                                                                                                                                                                                  |

|                                                           |                              |                 |                                                                                                                                                                                                                                            |
|-----------------------------------------------------------|------------------------------|-----------------|--------------------------------------------------------------------------------------------------------------------------------------------------------------------------------------------------------------------------------------------|
|                                                           | 381<br>52                    |                 |                                                                                                                                                                                                                                            |
| PID_NETRIN_PATHWAY                                        | -<br>1.3<br>795<br>666<br>17 | 0.1974<br>1161  | ELMO1/DCC/UNC5A/AGAP2/CAMK2A                                                                                                                                                                                                               |
| REACTOME_PROCESSING_OF_DNA_DOUBLE_STRAND_BREAK_ENDS       | -<br>1.3<br>812<br>478<br>41 | 0.0956<br>44376 | RPA3/RPA2/H4C12/CCNA2/H2BC8/UBE2V2/UBA52/PPP4C/H4C6/SUMO1/H4-16/BABAM1/SUMO2/H2BU1/RPS27A/H2BC21/H2BC15/H2AX/H2BC6/UBB/H2BC4/H2BC9/H2BC7/UBE2N/H4C8/H4C11/H4C15/H2BC13/H2BC14/H4C5/H4C4/H4C1/H4C2/H2BC3/H2BC10/H4C3/H4C13                  |
| REACTOME_CYCLIN_A_CDK2_ASSOCIATED_EVENTS_AT_S_PHASE_ENTRY | -<br>1.3<br>812<br>790<br>94 | 0.1274<br>24076 | PSMA1/PSMD3/PSMD6/PSMC3/TFDP2/LIN37/PSMD9/RBBP4/MNAT1/PSMA4/PSMD4/CCNA2/UBA52/E2F5/PSMC6/PSMB7/CKS1B/PSMA5/PSMD14/CABLES1/CDC25A/PSMB5/PSMB4/CDKN1B/RPS27A/PSMB6/PSMD8/CNH/PSMA6/PSMA7/PSMD13/PSMB1/UBB/PSMA2/PSMD10/SKP1/PSMB3/CCND1/CDK4 |
| KEGG_TAURINE_AND_HYPOTAURINE_METABOLISM                   | -<br>1.3<br>837<br>124<br>82 | 0.2149<br>65139 | GGT6/ADO/GAD1/BAAT/GAD2                                                                                                                                                                                                                    |
| REACTOME_LYSINE_CATABOLISM                                | -<br>1.3<br>854<br>025<br>85 | 0.2268<br>09038 | GCDH/AADAT/SLC25A21/CRYM                                                                                                                                                                                                                   |
| REACTOME_RECEPTOR_TYPE_TYROSINE_PROTEIN_PHOSPHATASES      | -<br>1.3<br>859<br>908<br>3  | 0.2073<br>28803 | SLITRK6/PTPRD/SLITRK5/PPFIA4/SLITRK2/IL1RAPL2/PPFIA3/IL1RAPL1/SLITRK4/SLITRK1                                                                                                                                                              |

|                                                  |                              |                 |                                                                                                                                                                                                                                                                                                                                                                                                                                                                                                                                                                                                                                                                                            |
|--------------------------------------------------|------------------------------|-----------------|--------------------------------------------------------------------------------------------------------------------------------------------------------------------------------------------------------------------------------------------------------------------------------------------------------------------------------------------------------------------------------------------------------------------------------------------------------------------------------------------------------------------------------------------------------------------------------------------------------------------------------------------------------------------------------------------|
| REACTOME_PRE_NOTCH_EXPRESSION_AND_PROCESSING     | -<br>1.3<br>860<br>171<br>75 | 0.1115<br>72734 | H2BC21/H2BC15/H3-3A/ST3GAL6/H2AX/H2BC6/H3C4/H3C7/H2AZ1/H2BC4/H2BC9/H2BC7/H3C1/H2AC7/H2AC20/CCND1/H4C8/H4C11/H4C15/H2BC13/H2BC14/MIR302A/H2AC14/H2AC4/H3C15/H4C5/H2AC8/H4C4/H4C1/H4C2/H2AB1/H2BC3/H2BC10/H4C3/H3C11/H4C13                                                                                                                                                                                                                                                                                                                                                                                                                                                                   |
| REACTOME_CELL_CYCLE_CHECKPOINTS                  | -<br>1.3<br>875<br>004<br>43 | 0.0330<br>41667 | PSMD9/CENPL/B9D2/YWHAH/PSMA4/PSMD4/RPA3/SEC13/CENPA/CENPS/DYNC1LI1/RPA2/PPP1CC/H4C12/CCNA2/H2BC8/UBE2V2/CENPK/PLK1/ANAPC5/UBA52/PPP2CB/CDC45/CENPU/PPP2R5B/CCNB1/ANAPC16/PP2CA/H4C6/ANAPC10/CDK1/PKMYT1/SUMO1/H4-16/PSMC6/CENPM/MCM10/PSMB7/PSMA5/BABAM1/CCNB2/PPP2R5A/PSMD14/H2BU1/CDC25A/RPS27/PSMB5/PSMB4/CDKN1B/SGO1/RPS27A/ORC6/PSMB6/PSMD8/CDC25C/PSMA6/PMF1/NUF2/H2BC21/ITGB3BP/PSMA7/PSMD13/H2BC15/ORC4/H2AX/UBE2E1/PSMB1/H2BC6/CENPH/YWHAQ/SKA2/UBB/AURKB/SPC24/H2BC4/PSMA2/PSMD10/CENPQ/YWHAH/H2BC9/NSL1/H2BC7/UBE2N/DYNLL1/UBE2C/PSMB3/SPC25/UBE2S/ANAPC15/ANAPC11/H4C8/PCBP4/H4C11/H4C15/BIRC5/MAD2L1/H2BC13/H2BC14/CLASP2/H4C5/H4C4/H4C1/H4C2/H2BC3/H2BC10/H4C3/DYNC1I1/H4C13 |
| REACTOME_ACTIVATION_OF_AMPK_DOWNSTREAM_OF_NMDARS | -<br>1.3<br>888<br>308<br>4  | 0.1843<br>19461 | TUBA1B/TUBB2A/PRKAG1/TUBB2B/TUBA4B/PRKAG2/TUBA4A/TUBAL3/TUBB3/TUBA3C/MAPT/TUBA8/TUBA1A/TUBB4A                                                                                                                                                                                                                                                                                                                                                                                                                                                                                                                                                                                              |
| BIOCARTA_LIS1_PATHWAY                            | -<br>1.3<br>891<br>657<br>43 | 0.2048<br>97795 | DNAH2/DNAH6/DCTN6/DYNLL1/CDK5/DCTN3/CDK5R1/DCX/RELN                                                                                                                                                                                                                                                                                                                                                                                                                                                                                                                                                                                                                                        |
| REACTOME_FGFR3_LIGAND_BINDING_AND_ACTIVATION     | -<br>1.3<br>901<br>198<br>15 | 0.2149<br>65139 | FGF4/FGF23/FGF16/FGF8/FGF9/FGF17                                                                                                                                                                                                                                                                                                                                                                                                                                                                                                                                                                                                                                                           |
| REACTOME_FRS_MEDIATED_FGFR2_SIGNALING            | -<br>1.3<br>913              | 0.1819<br>94414 | FGF22/FGF20/FRS2/FRS3/FGF4/FGFR2/FGF23/FGF16/FGF8/FGF9/FGF3/FGF17                                                                                                                                                                                                                                                                                                                                                                                                                                                                                                                                                                                                                          |

|                                                                                   |                              |                 |                                                                                                 |
|-----------------------------------------------------------------------------------|------------------------------|-----------------|-------------------------------------------------------------------------------------------------|
|                                                                                   | 144<br>24                    |                 |                                                                                                 |
| REACTOME_COOPERATION_OF_PDCL_PHLIP1_AND_TRIC_CCT_IN_G_PROTEIN_BETA_FOLDING        | -<br>1.3<br>918<br>161<br>71 | 0.1616<br>69719 | CCT7/CCT6A/GNAT3/CCT3/CCT4/RGS9/GNAZ/GNG7/GNAT1/GNAO1/CCT2/GNG2/GNAI1/RGS7/GNG4/GNG8/GNG13/GNG3 |
| REACTOME_ADHERENS_JUNCTIONS_INTERACTIONS                                          | -<br>1.3<br>921<br>440<br>67 | 0.1904<br>2019  | CDH3/NECTIN1/CDH13/CDH7/CDH8/CADM2/CDH12/CDH18/CDH9                                             |
| REACTOME_ABORTIVE_ELONGATION_OF_HIV_1_TRANSCRIPT_IN_THE_ABSENCE_OF_TAT            | -<br>1.3<br>939<br>791<br>31 | 0.2029<br>08912 | POLR2C/POLR2L/POLR2J/NELFE/POLR2K/POLR2I/SUPT4H1/POLR2G/POLR2F                                  |
| REACTOME_INTERCONVERSION_OF_NUCLEOTIDE_DI_AND_TRIPHOSPHATES                       | -<br>1.3<br>947<br>615<br>2  | 0.1782<br>66457 | AK8/NUDT13/DUT/NME3/NME4/AK1/NME2/GUK1/AK9/DTYMK/NME1/DCTPP1/AK5                                |
| REACTOME_ADP_SIGNALLING_THROUGH_P2Y_PURINOCEPTOR_12                               | -<br>1.3<br>961<br>083<br>64 | 0.2297<br>46858 | GNG2/GNAI1/GNG4/GNG8/GNG13/GNG3                                                                 |
| WP_THYROID_HORMONES_PRODUCTION_AND_THEIR_PERIPHERAL_DOWNSTREAM_SIGNALLING_EFFECTS | -<br>1.3<br>989<br>927<br>49 | 0.0980<br>92643 | PLIN1/THRA/KLB/PLCB1/AQP7/TSHR/ACTL6B/NPPB/NPPA/MC4R/FGF21/NPY/PRKG2                            |

|                                                                 |                              |                 |                                                                                                                                            |
|-----------------------------------------------------------------|------------------------------|-----------------|--------------------------------------------------------------------------------------------------------------------------------------------|
| WP_PTF1A_RELATED_REGULATORY_PATHWAY                             | -<br>1.3<br>990<br>662<br>9  | 0.1966<br>67442 | RBPJ/NKX6-1/KAT2B/PTF1A/RBPJL/PDX1                                                                                                         |
| REACTOME_MITOCHONDRIAL_CALCIIUM_ION_TRANSPORT                   | -<br>1.3<br>992<br>837<br>4  | 0.2029<br>08912 | VDAC2/PARL/MICU1/PHB/VDAC3/STOML2/PHB2/MICU3/SMDT1/SLC8A3                                                                                  |
| KEGG_LONG_TERM_POTENTIATION                                     | -<br>1.4<br>018<br>013<br>91 | 0.1243<br>27555 | CALM2/PRKACB/CALML3/CAMK2G/PPP3R2/GRIN2A/PLCB1/GRIA2/GRM5/PPP1R1A/GRIN2B/CAMK2A/CHP2/PRKCG/GRIN1                                           |
| REACTOME_ACTIVATION_OF_KAINATE_RECEPTORS_UPON_Glutamate_BINDING | -<br>1.4<br>064<br>988<br>34 | 0.1548<br>61614 | GNG2/NCALD/PLCB1/GRIK2/GNG4/GNG8/GNG13/GNG3                                                                                                |
| REACTOME_SEALING_OF_THE_NUCLEAR_ENVELOPE_BY_ESCRT_III           | -<br>1.4<br>084<br>840<br>66 | 0.1773<br>63836 | TUBA1B/SPAST/TUBB2A/CHMP6/TUBB2B/TUBA4B/TUBA4A/TUBAL3/TUBB3/TUBA3C/TUBA8/TUBA1A/TUBB4A                                                     |
| WP_PROXIMAL_TUBULE_TRANSPORT                                    | -<br>1.4<br>086<br>812<br>01 | 0.1265<br>61277 | ATP6V1E1/SLC22A2/SLC36A2/SLC2A2/SLC6A19/ATP6V0B/SLC3A1/SLC5A1/ATP6V1F/ATP1B1/AQP1/CA4/SLC22A8/SLC6A20/FXYD2/SLC1A1/SLC5A8/SLC22A6/ATP6V0A4 |
| KEGG_GAP_JUNCTION                                               | -<br>1.4<br>095              | 0.0920<br>88108 | TUBA4A/TUBAL3/PRKCB/TUBB3/TUBA3C/GUCY1B1/PRKACB/ADCY2/TUBA8/GNAI1/PLCB1/GRM5/HTR2A/DRD1/TUBA1A/ADCY5/HTR2C/PDGFR/GJD2/PRKCG/TUBB4A/PRKG2   |



|                                                        |                              |                 |                                                                                                                                                                                                                                                                                                                                                                                                                                                                                                                                                                                                                                                                                                                                                                                                                                                                                                                                                                                                        |
|--------------------------------------------------------|------------------------------|-----------------|--------------------------------------------------------------------------------------------------------------------------------------------------------------------------------------------------------------------------------------------------------------------------------------------------------------------------------------------------------------------------------------------------------------------------------------------------------------------------------------------------------------------------------------------------------------------------------------------------------------------------------------------------------------------------------------------------------------------------------------------------------------------------------------------------------------------------------------------------------------------------------------------------------------------------------------------------------------------------------------------------------|
|                                                        | 549<br>7                     |                 |                                                                                                                                                                                                                                                                                                                                                                                                                                                                                                                                                                                                                                                                                                                                                                                                                                                                                                                                                                                                        |
| REACTOME_SIGNALING_BY_FGFR2_IN_DISEASE                 | -<br>1.4<br>197<br>473<br>06 | 0.1335<br>51647 | POLR2C/FGF22/FGF20/POLR2L/POLR2J/FRS2/FGF4/POLR2K/FGFR2/POLR2I/FGF23/POLR2G/FGF16/FGF8/<br>FGF9/FGF3/FGF17/POLR2F                                                                                                                                                                                                                                                                                                                                                                                                                                                                                                                                                                                                                                                                                                                                                                                                                                                                                      |
| REACTOME_M_PHASE                                       | -<br>1.4<br>208<br>016<br>66 | 0.0198<br>64398 | CSNK2B/ENSA/CCP110/PSMA4/PSMD4/NCAPH2/SEC13/CENPA/CENPS/NME7/MAPK3/MZT2B/DYNC1L1/PP<br>P1CC/H4C12/TMPO/H2BC8/NUP88/PPP2R2D/H3C13/CENPK/TUBA1B/RAD21/H2AC19/PLK1/ANAPC5/UBA52/<br>PPP2CB/CENPU/SPAST/PPP2R5B/CCNB1/ANAPC16/PPP2CA/TUBB2A/CHMP6/H4C6/ANAPC10/CDK1/TUBB2<br>B/SUMO1/H4-<br>16/NEK2/PSMC6/NCAPH/RAB2A/CENPM/PSMB7/PSMA5/H2AC6/TUBA4B/H3C12/CCNB2/RAN/PPP2R5A/PSM<br>D14/H2BU1/RPS27/PSMB5/CEP70/PSMB4/SGO1/RPS27A/CSNK1E/CETN2/PSMB6/PPP2R2A/PSMD8/PTTG1/<br>PSMA6/PMF1/NUF2/H2BC21/ITGB3BP/PSMA7/ACTR1A/PSMD13/H2BC15/H3-<br>3A/H2AX/HAUS1/UBE2E1/PSMB1/H2BC6/H3C4/TUBA4A/CENPH/TUBAL3/MZT1/H3C7/H2AZ1/SKA2/PRKCB/U<br>BB/AURKB/SSNA1/SPC24/TUBB3/H2BC4/TUBA3C/NUP35/CENPJ/PSMA2/PSMD10/CENPQ/YWHAH/H2BC9/N<br>SL1/H2BC7/BANF1/H3C1/DYNLL1/H2AC7/UBE2C/PSMB3/SPC25/UBE2S/ANAPC15/ANAPC11/H2AC20/H4C8/H<br>4C11/H4C15/BIRC5/MAD2L1/H2BC13/DCTN2/H2BC14/TUBA8/H2AC14/H2AC4/DCTN3/H3C15/CLASP2/H4C5/H<br>2AC8/H4C4/TUBA1A/H4C1/H4C2/H2AB1/H2BC3/SIRT2/H2BC10/H4C3/H3C11/DYNC111/H4C13/TUBB4A |
| REACTOME_FRS_MEDIATED_FGFR4_SIGNALING                  | -<br>1.4<br>218<br>709<br>81 | 0.1990<br>46185 | FGF20/FRS2/FGFR4/FRS3/FGF4/FGF23/FGF16/KLB/FGF8/FGF9/FGF17                                                                                                                                                                                                                                                                                                                                                                                                                                                                                                                                                                                                                                                                                                                                                                                                                                                                                                                                             |
| REACTOME_TP53_REGULATES_METABOLIC_GENES                | -<br>1.4<br>222<br>595<br>99 | 0.1072<br>73839 | PRKAG1/LAMTOR3/COX11/CYCS/TACO1/PRKAG2/RRAGB/COX18/PRDX1/COX16/LAMTOR1/COX6C/YWHAQ<br>/COX5A/MLST8/SURF1/PRDX5/YWHAH/COX7A2L/COX7C/LAMTOR5/COX6B1/COX8A/COX14/LAMTOR4/COX<br>4I1/PRDX2/COX5B/GLS2/COX7B/COX6A1/NDUFA4                                                                                                                                                                                                                                                                                                                                                                                                                                                                                                                                                                                                                                                                                                                                                                                  |
| REACTOME_NA_CL_DEPENDENT_NEUROTRANSMITTER_TRANSPORTERS | -<br>1.4<br>243              | 0.1536<br>54807 | SLC22A2/SLC6A3/SLC6A19/SLC18A1/SLC6A13/SLC6A20/SLC6A15/SLC6A7                                                                                                                                                                                                                                                                                                                                                                                                                                                                                                                                                                                                                                                                                                                                                                                                                                                                                                                                          |

|                                           |                              |                 |                                                                                                                                                                                                                                                                                                                                                                                                                                                                                                                                 |
|-------------------------------------------|------------------------------|-----------------|---------------------------------------------------------------------------------------------------------------------------------------------------------------------------------------------------------------------------------------------------------------------------------------------------------------------------------------------------------------------------------------------------------------------------------------------------------------------------------------------------------------------------------|
|                                           | 964<br>47                    |                 |                                                                                                                                                                                                                                                                                                                                                                                                                                                                                                                                 |
| REACTOME_DEGRADATION_OF_DVL               | -<br>1.4<br>277<br>546<br>56 | 0.1143<br>17684 | PSMA1/PSMD3/PSMD6/PSMC3/PSMD9/PSMA4/PSMD4/KLHL12/UBA52/PSMC6/PSMB7/PSMA5/PSMD14/PSMB5/PSMB4/RPS27A/PSMB6/PSMD8/PSMA6/PSMA7/PSMD13/PSMB1/UBB/PSMA2/PSMD10/PSMB3/RBX1/HECW1                                                                                                                                                                                                                                                                                                                                                       |
| REACTOME_SEPARATION_OF_SISTER_CHROMATIDS  | -<br>1.4<br>337<br>220<br>06 | 0.0349<br>4851  | PSMD3/PSMD6/PSMC3/CENPN/TUBB4B/MIS12/PSMD9/CENPL/B9D2/PSMA4/PSMD4/SEC13/CENPA/CENPS/DYNC1LI1/PPP1CC/CENPK/TUBA1B/RAD21/PLK1/ANAPC5/UBA52/PPP2CB/CENPU/PPP2R5B/ANAPC16/PPP2CA/TUBB2A/ANAPC10/TUBB2B/PSMC6/CENPM/PSMB7/PSMA5/TUBA4B/PPP2R5A/PSMD14/RPS27/PSMB5/PSMB4/SGO1/RPS27A/PSMB6/PSMD8/PTTG1/PSMA6/PMF1/NUF2/ITGB3BP/PSMA7/PSMD13/UBE2E1/PSMB1/TUBA4A/CENPH/TUBAL3/SKA2/UBB/AURKB/SPC24/TUBB3/TUBA3C/PSMA2/PSMD10/CENPQ/NSL1/DYNLL1/UBE2C/PSMB3/SPC25/UBE2S/ANAPC15/ANAPC11/BIRC5/MAD2L1/TUBA8/CLASP2/TUBA1A/DYNC111/TUBB4A |
| REACTOME_REGULATION_OF_SIGNALING_BY_NODAL | -<br>1.4<br>385<br>618<br>89 | 0.1642<br>87638 | ACVR2B/NODAL/LEFTY1/DAND5/ACVR1C/TDGF1/CFC1                                                                                                                                                                                                                                                                                                                                                                                                                                                                                     |
| REACTOME_ACTIVATION_OF_RAC1               | -<br>1.4<br>389<br>642<br>02 | 0.1592<br>86048 | PAK6/PAK3/PAK5                                                                                                                                                                                                                                                                                                                                                                                                                                                                                                                  |
| REACTOME_FRS_MEDIATED_FGFR3_SIGNALING     | -<br>1.4<br>415<br>923<br>09 | 0.1505<br>69885 | FGF20/FRS2/FRS3/FGF4/FGF23/FGF16/FGF8/FGF9/FGF17                                                                                                                                                                                                                                                                                                                                                                                                                                                                                |
| REACTOME_OPIOID_SIGNALLING                | -<br>1.4<br>459              | 0.0792<br>09475 | PDE4C/GNAZ/POMC/PPP3CB/GNG7/GNAT1/GNAO1/PRKAR1B/PRKACB/CDK5/CAMK2G/ADCY2/CAMKK1/GNG2/GNAI1/PLCB1/GNAL/PDYN/GNG4/GNG8/PPP1R1B/ADCY5/PDE1A/GNG13/OPRM1/GNG3/CAMK2A/PRKG                                                                                                                                                                                                                                                                                                                                                           |

|                                                     |                              |                 |                                                                                                                                                                                                                                                                                                                                                                 |
|-----------------------------------------------------|------------------------------|-----------------|-----------------------------------------------------------------------------------------------------------------------------------------------------------------------------------------------------------------------------------------------------------------------------------------------------------------------------------------------------------------|
|                                                     | 312<br>26                    |                 |                                                                                                                                                                                                                                                                                                                                                                 |
| REACTOME_REDUCTION_OF_CYTOSOLIC_CALEVELS            | -<br>1.4<br>481<br>186<br>71 | 0.1517<br>01783 | SRI/ATP2B2/SLC8A2/SLC8A3/ATP2B3                                                                                                                                                                                                                                                                                                                                 |
| REACTOME_METALLOPROTEASE_DUBS                       | -<br>1.4<br>503<br>979<br>38 | 0.1423<br>98244 | KAT2B/STAMBP/H2AC19/STAM/UBA52/H2AC6/BABAM1/PSMD14/RPS27A/H2AC16/H2AC17/UBB/H2AC7/H2AC20/H2AC12/H2AC21/H2AC14/H2AC4/H2AC8/H2AW                                                                                                                                                                                                                                  |
| REACTOME_NEGATIVE_REGULATION_OF_NOTCH4_SIGNALING    | -<br>1.4<br>504<br>684<br>29 | 0.0862<br>76598 | PSMA1/PSMD3/PSMD6/PSMC3/PSMD9/PSMA4/PSMD4/UBA52/FBXW7/PSMC6/PSMB7/PSMA5/PSMD14/PSMB5/PSMB4/RPS27A/PSMB6/PSMD8/PSMA6/PSMA7/PSMD13/PSMB1/UBB/PSMA2/PSMD10/SKP1/PSMB3/RBX1                                                                                                                                                                                         |
| KEGG_RETINOL_METABOLISM                             | -<br>1.4<br>510<br>369<br>09 | 0.0973<br>05805 | UGT2B4/ADH5/CYP26B1/RDH16/RDH12/CYP3A5/CYP2A13/CYP3A43/CYP2A6/RPE65/UGT2B28/CYP2C8/UGT2B15/CYP2C18/UGT2B17/ADH7/CYP4A22/CYP4A11/DHRS9/UGT2B7/ADH1B                                                                                                                                                                                                              |
| REACTOME_MITOTIC_PROPHASE                           | -<br>1.4<br>518<br>727       | 0.0500<br>31546 | ENSA/NCAPH2/SEC13/MAPK3/H4C12/TMPO/H2BC8/NUP88/PPP2R2D/H3C13/H2AC19/PLK1/PPP2CB/CCNB1/PPP2CA/H4C6/CDK1/H4-16/RAB2A/H2AC6/H3C12/CCNB2/H2BU1/H2BC21/H2BC15/H3-3A/H2AX/H2BC6/H3C4/H3C7/H2AZ1/PRKCB/H2BC4/NUP35/H2BC9/H2BC7/BANF1/H3C1/H2AC7/H2AC20/H4C8/H4C11/H4C15/H2BC13/H2BC14/H2AC14/H2AC4/H3C15/H4C5/H2AC8/H4C4/H4C1/H4C2/H2AB1/H2BC3/H2BC10/H4C3/H3C11/H4C13 |
| WP_SPLICING_FACTOR_NOVA_REGULATED_SYNAPTIC_PROTEINS | -<br>1.4<br>542<br>752<br>75 | 0.1114<br>45536 | CAMK2G/NCDN/KCNQ2/ANK3/GABBR2/GRIK2/DAB1/GRIN2B/PRKCZ/GABRG2/GRIN1                                                                                                                                                                                                                                                                                              |

|                                                                                  |                              |                 |                                                                                                                                                                                            |
|----------------------------------------------------------------------------------|------------------------------|-----------------|--------------------------------------------------------------------------------------------------------------------------------------------------------------------------------------------|
| REACTOME_RAS_PROCESSING                                                          | -<br>1.4<br>559<br>375<br>08 | 0.1643<br>1522  | UBA52/FNTA/LYPLA1/RPS27A/GOLGA7/PRKCQ/UBB/ABHD17B/USP17L2/PDE6D/ARL2/PRKG2                                                                                                                 |
| REACTOME_KINESINS                                                                | -<br>1.4<br>573<br>465<br>35 | 0.0929<br>66521 | TUBB2A/KIF3C/TUBB2B/KIF22/TUBA4B/KIF21A/TUBA4A/TUBAL3/KIF3A/KIF25/TUBB3/TUBA3C/KIF9/KIF1A/TUBA8/KIF26A/TUBA1A/KIF21B/KIF19/KIF12/KIF5A/TUBB4A                                              |
| REACTOME_COPI_INDEPENDENT_GOLGI_TO_ER<br>_RETROGRADE_TRAFFIC                     | -<br>1.4<br>575<br>163<br>63 | 0.0963<br>12776 | PLA2G4A/TUBA1B/ACTR10/PLA2G6/TUBB2A/TUBB2B/RAB18/TUBA4B/ACTR1A/TUBA4A/TUBAL3/TUBB3/TUBA3C/DCTN6/DYNLL1/PAFAH1B3/RAB6B/DCTN2/TUBA8/DCTN3/TUBA1A/DYNC111/TUBB4A                              |
| REACTOME_SLBP_DEPENDENT_PROCESSING_OF<br>REPLICATION_DEPENDENT_HISTONE_PRE_MRNAS | -<br>1.4<br>587<br>333<br>05 | 0.1612<br>00705 | SNRPF/SNRPB/LSM10/SNRPE/SNRPG                                                                                                                                                              |
| REACTOME_PHOSPHORYLATION_OF_THE_APC_COMPLEX                                      | -<br>1.4<br>614<br>317<br>54 | 0.1342<br>1452  | PLK1/ANAPC5/CCNB1/ANAPC16/ANAPC10/CDK1/UBE2E1/UBE2C/UBE2S/ANAPC15/ANAPC11                                                                                                                  |
| WP_FBXL10_ENHANCEMENT_OF_MAPERK_SIGNALING_IN_DIFFUSE_LARGE_BCELL_LYMPHOMA        | -<br>1.4<br>619<br>534<br>63 | 0.1251<br>47952 | H3-3A/H2AX/H3C4/H3C7/H2AZ1/H3C1/MACROH2A2/H3C15/H2AB1/H3C11                                                                                                                                |
| REACTOME_SCF_SKP2_MEDIATED_DEGRADATION_OF_P27_P21                                | -<br>1.4<br>684              | 0.0833<br>61723 | PSMA1/PSMD3/PSMD6/PSMC3/PSMD9/PSMA4/PSMD4/CCNA2/UBA52/PSMC6/PSMB7/CKS1B/PSMA5/PSMD14/PSMB5/PSMB4/CDKN1B/RPS27A/PSMB6/PSMD8/PSMA6/PSMA7/PSMD13/PSMB1/UBB/PSMA2/PSMD10/SKP1/PSMB3/CCND1/CDK4 |

|                                                                           |                              |                 |                                                                                                                                                                                                                                                       |
|---------------------------------------------------------------------------|------------------------------|-----------------|-------------------------------------------------------------------------------------------------------------------------------------------------------------------------------------------------------------------------------------------------------|
|                                                                           | 030<br>64                    |                 |                                                                                                                                                                                                                                                       |
| REACTOME_HORMONE_LIGAND_BINDING_RECEPTORS                                 | -<br>1.4<br>686<br>658<br>24 | 0.1286<br>73022 | GPHB5/CGA/FSHR/FSHB/GPHA2/TSHR                                                                                                                                                                                                                        |
| REACTOME_GLUCAGON_LIKE_PEPTIDE_1_GLP1_REGULATES_INSULIN_SECRETION         | -<br>1.4<br>716<br>255<br>94 | 0.0851<br>81586 | PRKAR1B/PRKACB/GNG2/RAPGEF4/KCNS3/GNG4/GNG8/KCNB1/ADCY5/GNG13/GNG3/KCNC2/GLP1R                                                                                                                                                                        |
| BIOCARTA_ETC_PATHWAY                                                      | -<br>1.4<br>725<br>095<br>6  | 0.1467<br>56998 | SLC25A6/SDHC/ATP5F1A/SDHD/UQCRC1/SDHB/NDUFA1/SLC25A4                                                                                                                                                                                                  |
| REACTOME_TRAFFICKING_OF_GLUR2_CONTAINING_AMPA_RECEPTORS                   | -<br>1.4<br>735<br>389<br>39 | 0.1113<br>09962 | NSF/PRKCB/GRIP1/GRIP2/GRIA4/TSPAN7/GRIA2/PRKCG                                                                                                                                                                                                        |
| REACTOME_PROTEIN_UBIQUITINATION                                           | -<br>1.4<br>786<br>591<br>94 | 0.0738<br>36127 | UBE2R2/UBE2D3/PEX12/UBE2J2/RRAGA/USP5/H2BC1/UBE2Q2/UBE2B/PEX5/UBE2L3/UBE2D2/H2BC8/UBE2V2/UBE2A/UBA52/UCHL3/WDR61/CDC34/RPS27A/RNF144A/RNF181/H2BC15/UBE2E1/H2BC6/UBB/H2BC4/UBE2E3/H2BC9/H2BC7/UBE2N/UBE2C/PEX2/UBE2S/H2BC13/H2BC14/UBE2T/H2BC3/H2BC10 |
| REACTOME_SYNTHESIS_OF_BILE_ACIDS_AND_BILE_SALTS_VIA_27_HYDROXYCHOLESTEROL | -<br>1.4<br>805<br>702<br>82 | 0.1217<br>41026 | NR1H4/AKR1C3/AKR1C4/AKR1C2/AKR1C1                                                                                                                                                                                                                     |

|                                                  |                              |                 |                                                                                                                                                                                                                                                             |
|--------------------------------------------------|------------------------------|-----------------|-------------------------------------------------------------------------------------------------------------------------------------------------------------------------------------------------------------------------------------------------------------|
| KEGG_AMYOTROPHIC_LATERAL_SCLEROSIS_ALS           | -<br>1.4<br>810<br>210<br>21 | 0.0800<br>93872 | PPP3R2/BID/GRIN2A/GRIA2/NEFL/NEFH/NOS1/GRIN2B/CHP2/NEFM/GRIN1                                                                                                                                                                                               |
| WP_GPCRS_CLASS_B_SECRETINLIKE                    | -<br>1.4<br>825<br>897<br>54 | 0.1286<br>73022 | ADGRL3/GIPR/VIPR1/CALCRL/CRHR2/PTH2R/GLP2R/LINC02210-CRHR1/VIPR2/CRHR1/GLP1R                                                                                                                                                                                |
| REACTOME_APC_CDC20_MEDIATED_DEGRADATION_OF_NEK2A | -<br>1.4<br>834<br>912<br>68 | 0.1156<br>58363 | ANAPC5/UBA52/ANAPC16/ANAPC10/NEK2/RPS27A/UBE2E1/UBB/UBE2C/UBE2S/ANAPC15/ANAPC11/MAD2L1                                                                                                                                                                      |
| REACTOME_AGGREPHAGY                              | -<br>1.4<br>836<br>880<br>11 | 0.1005<br>72339 | TUBA1B/UBA52/TUBB2A/TUBB2B/TUBA4B/RPS27A/TUBA4A/TUBAL3/UBB/PARK7/TUBB3/TUBA3C/UBE2N/DYNLL1/CFTR/TUBA8/TUBA1A/DYNC111/TUBB4A                                                                                                                                 |
| WP_SEROTONIN_AND_ANXIETY                         | -<br>1.4<br>838<br>911<br>28 | 0.1074<br>52575 | POMC/PRKCB/HTR2A/HTR2C/GABRA1/HTR1A                                                                                                                                                                                                                         |
| REACTOME_PROTEIN_FOLDING                         | -<br>1.4<br>852<br>388<br>62 | 0.0587<br>3494  | TUBA1B/TBCC/FBXW7/CCT7/TUBB2A/CCT6A/TUBB2B/GNAT3/CCT3/FBXL5/CCT4/TUBA4B/FBXW10/PFDN1/PFDN2/WRAP53/RGS9/TUBA4A/GNAZ/TBCB/PFDN6/VBP1/TUBAL3/TUBB3/TUBA3C/GNG7/GNAT1/GNAO1/TBCA/CCT2/PFDN4/ARL2/PFDN5/GNG2/TUBA8/GNAI1/RGS7/TUBA1A/GNG4/GNG8/GNG13/GNG3/TUBB4A |
| WP_HISTONE_MODIFICATIONS                         | -<br>1.4                     | 0.0851<br>81586 | SETMAR/H3-3A/SMYD3/SUV39H2/H3C4/H3C7/SETD9/H3C1/H4C8/H4C11/H3C15/H4C5/H4C4/H4C1/H4C2/H4C3/H3C11/H4C13                                                                                                                                                       |

|                                                                                                |                              |                 |                                                                                                                                                                                                                                                                                                                                                                                                                                                                                                                                                   |
|------------------------------------------------------------------------------------------------|------------------------------|-----------------|---------------------------------------------------------------------------------------------------------------------------------------------------------------------------------------------------------------------------------------------------------------------------------------------------------------------------------------------------------------------------------------------------------------------------------------------------------------------------------------------------------------------------------------------------|
|                                                                                                | 883<br>661                   |                 |                                                                                                                                                                                                                                                                                                                                                                                                                                                                                                                                                   |
| REACTOME_PLATELET_HOMEOSTASIS                                                                  | -<br>1.4<br>911<br>166<br>16 | 0.0510<br>20408 | PDE10A/P2RX5/ATP2B2/GNG2/KCNMB4/P2RX7/GNG4/GNG8/NOS1/PDE1A/GNG13/SLC8A2/KCNMB2/GNG3/<br>PDE2A/SLC8A3/ATP2B3/PRKG2                                                                                                                                                                                                                                                                                                                                                                                                                                 |
| REACTOME_RUNX1_REGULATES_GENES_INVOLVED_IN_MEGAKARYOCYTE_DIFFERENTIATION_AND_PLATELET_FUNCTION | -<br>1.4<br>923<br>056<br>67 | 0.0660<br>17316 | H2BC21/PRKCQ/H2BC15/H3-<br>3A/H2AX/H2BC6/H3C4/H3C7/PRMT1/H2AZ1/H2BC4/DPY30/H2BC9/H2BC7/H3C1/H2AC7/H2AC20/H4C8/H4C11<br>/H4C15/H2BC13/H2BC14/H2AC14/H2AC4/H3C15/H4C5/H2AC8/H4C4/H4C1/H4C2/H2AB1/H2BC3/H2BC10/H4C<br>3/H3C11/H4C13                                                                                                                                                                                                                                                                                                                  |
| REACTOME_PROTEIN_LOCALIZATION                                                                  | -<br>1.4<br>927<br>194<br>67 | 0.0324<br>98816 | PECR/DECR2/PEX11B/TIMM22/TIMM8A/TIMM44/UBE2D3/TIMM21/PEX12/PRNP/UBE2J2/ACBD5/PEX16/PMP<br>CA/VAPA/MPV17/ECH1/GNPAT/TIMM17A/ZFAND6/PEX5/ACO2/UBE2D2/BCS1L/SLC25A6/PEX7/SEC61B/UBA<br>52/HACL1/SERP1/SLC27A2/TIMM9/GFER/TOMM20/ATP5F1A/TIMM23/MTX2/ACOT8/PEX19/SLC25A17/CYB5A<br>/CHCHD10/LDHD/RPS27A/ATP5F1B/COA6/SGTA/GDAP1/TIMM13/COA4/UBB/ACOT4/CAMLG/PXMP2/GET1/T<br>OMM5/COX17/HSCB/GET3/TIMM17B/SEC61G/DNAJC19/NUDT7/TIMM50/PEX2/PAM16/CHCHD5/FIS1/CMC2/C<br>YC1/TIMM10/VAMP2/NDUFB8/TOMM22/STX1A/SLC25A4/CHCHD2/ATP5MC1/OTC/TIMM8B/BAAT/DAO |
| KEGG_MATURITY_ONSET_DIABETES_OF_THE_YOUNG                                                      | -<br>1.4<br>939<br>638<br>65 | 0.0987<br>99784 | PAX4/SLC2A2/NEUROD1/IAPP/HNF1A/HNF1B/HNF4A/NKX2-2/PDX1/MNX1                                                                                                                                                                                                                                                                                                                                                                                                                                                                                       |
| REACTOME_THE_ROLE_OF_GTSE1_IN_G2_M_PROGRESSION_AFTER_G2_CHECKPOINT                             | -<br>1.4<br>949<br>183<br>98 | 0.0557<br>91636 | PSMA1/FKBPL/PSMD3/PSMD6/PSMC3/TUBB4B/PSMD9/PSMA4/PSMD4/TUBA1B/PLK1/UBA52/CCNB1/TUBB2<br>A/CDK1/TUBB2B/PSMC6/PSMB7/PSMA5/TUBA4B/CCNB2/PSMD14/PSMB5/PSMB4/RPS27A/PSMB6/PSMD8/P<br>SMA6/PSMA7/PSMD13/PSMB1/TUBA4A/TUBAL3/UBB/TUBB3/TUBA3C/PSMA2/PSMD10/PSMB3/TUBA8/TUBA<br>1A/TUBB4A                                                                                                                                                                                                                                                                 |
| REACTOME_GLYOXYLATE_METABOLISM_AND_GLYCINE_DEGRADATION                                         | -<br>1.4<br>962<br>861<br>84 | 0.1030<br>05431 | PDHB/GNMT/GOT2/LIAS/PXMP2/GCSH/GRHPR/NDUFAB1/DAO/AGXT2                                                                                                                                                                                                                                                                                                                                                                                                                                                                                            |

|                                                                                                                   |                              |                 |                                                                                                                                                                                                                                    |
|-------------------------------------------------------------------------------------------------------------------|------------------------------|-----------------|------------------------------------------------------------------------------------------------------------------------------------------------------------------------------------------------------------------------------------|
| REACTOME_NITRIC_OXIDE_STIMULATES_GUANYLATE_CYCLASE                                                                | -<br>1.4<br>981<br>136<br>43 | 0.1286<br>89199 | PDE10A/KCNMB4/NOS1/PDE1A/KCNMB2/PDE2A/PRKG2                                                                                                                                                                                        |
| REACTOME_APC_C_CDH1_MEDIATED_DEGRADATION_OF_CDC20_AND_OTHER_APC_C_CDH1_TARGETED_PROTEINS_IN_LATE_MITOSIS_EARLY_G1 | -<br>1.5<br>002<br>879<br>02 | 0.0673<br>99223 | PSMA1/PSMD3/PSMD6/PSMC3/PSMD9/PSMA4/PSMD4/PLK1/ANAPC5/UBA52/ANAPC16/ANAPC10/PSMC6/PSMB7/PSMA5/PSMD14/PSMB5/PSMB4/RPS27A/PSMB6/PSMD8/PTTG1/PSMA6/PSMA7/PSMD13/UBE2E1/PSMB1/UBB/AURKB/PSMA2/PSMD10/UBE2C/PSMB3/UBE2S/ANAPC15/ANAPC11 |
| REACTOME_TRANSCRIPTIONAL_REGULATION_BY_MECP2                                                                      | -<br>1.5<br>009<br>238<br>53 | 0.0749<br>86111 | GPRIN1/CAMK2G/GAD1/GRIN2A/DLL1/GRIA2/GAD2/SST/GRIN2B/OPRM1/CAMK2A/MOBP/RBFOX1/PVALB                                                                                                                                                |
| REACTOME_APC_C_CDC20_MEDIATED_DEGRADATION_OF_CYCLIN_B                                                             | -<br>1.5<br>010<br>042<br>18 | 0.1152<br>3586  | ANAPC5/UBA52/CCNB1/ANAPC16/ANAPC10/CDK1/RPS27A/UBE2E1/UBB/UBE2C/UBE2S/ANAPC15/ANAPC11                                                                                                                                              |
| KEGG_SPHINGOLIPID_METABOLISM                                                                                      | -<br>1.5<br>021<br>487<br>38 | 0.0783<br>39041 | B4GALT6/PLPP2/SMPD3/GAL3ST1/UGT8/NEU4                                                                                                                                                                                              |
| WP_PHOSPHODIESTERASES_IN_NEURONAL_FUNCTION                                                                        | -<br>1.5<br>099<br>359<br>18 | 0.0729<br>53977 | GUCY1B1/PDE6D/PDE6A/ADCY2/PDE10A/GRIN2A/DRD1/PPP1R1B/ADCY5/PDE6H/NOS1/PDE1A/GRIN2B/PDE2A/GRIN1                                                                                                                                     |
| REACTOME_FGFR2_LIGAND_BINDING_AND_ACTIVATION                                                                      | -<br>1.5<br>104              | 0.1143<br>17684 | FGFBP3/FGF4/FGFR2/FGF23/FGF16/FGFBP2/FGF8/FGF9/FGF3/FGF17                                                                                                                                                                          |



|                                                                |                              |                 |                                                                                                                                                                                                                                                                                 |
|----------------------------------------------------------------|------------------------------|-----------------|---------------------------------------------------------------------------------------------------------------------------------------------------------------------------------------------------------------------------------------------------------------------------------|
|                                                                | 643<br>08                    |                 |                                                                                                                                                                                                                                                                                 |
| REACTOME_INTERACTION_BETWEEN_L1_AND_A<br>NKYRINS               | -<br>1.5<br>114<br>078<br>23 | 0.1001<br>45581 | KCNQ2/ANK3/SPTB/SCN5A/SCN2B/SCN2A/SPTBN2/SCN3A/SCN3B/L1CAM                                                                                                                                                                                                                      |
| REACTOME_E3_UBIQUITIN_LIGASES_UBIQUITINA<br>TE_TARGET_PROTEINS | -<br>1.5<br>146<br>458<br>66 | 0.0833<br>68377 | UBE2D3/PEX12/UBE2J2/RRAGA/H2BC1/UBE2B/PEX5/UBE2L3/UBE2D2/H2BC8/UBE2V2/UBE2A/UBA52/WDR6<br>1/RPS27A/RNF144A/RNF181/H2BC15/UBE2E1/H2BC6/UBB/H2BC4/H2BC9/H2BC7/UBE2N/PEX2/H2BC13/H2B<br>C14/H2BC3/H2BC10                                                                           |
| WP_VITAMIN_DSENSITIVE_CALCIIUM_SIGNALING_<br>IN_DEPRESSION     | -<br>1.5<br>197<br>836<br>06 | 0.0660<br>17316 | KCNQ2/ATP2B2/GRIN2A/GRM5/CYP27B1/TPH2/GRIN2B/ATP2B3/CHRM1/GRIN1/PVALB                                                                                                                                                                                                           |
| REACTOME_SENESCENCE_ASSOCIATED_SECRE<br>TORY_PHENOTYPE_SASP_   | -<br>1.5<br>202<br>290<br>38 | 0.0467<br>42785 | CDKN1B/RPS27A/H2BC21/H2BC15/H3-<br>3A/H2AX/UBE2E1/H2BC6/H3C4/H3C7/H2AZ1/UBB/H2BC4/H2BC9/H2BC7/H3C1/H2AC7/UBE2C/UBE2S/ANAPC<br>15/ANAPC11/H2AC20/H4C8/H4C11/H4C15/CDKN2D/H2BC13/H2BC14/H2AC14/H2AC4/H3C15/H4C5/H2AC8/H4<br>C4/H4C1/H4C2/H2AB1/H2BC3/H2BC10/H4C3/H3C11/H4C13/CDK4 |
| WP_MECP2_AND_ASSOCIATED_RETT_SYNDROM<br>E                      | -<br>1.5<br>251<br>759<br>74 | 0.0598<br>5508  | FGF4/CSR1/IGF2/RPS6/GPRIN1/GRIA4/GAD1/CNP/POU4F1/DLX6/SST/DLX5/MAG/CAMK2A/FGF3/MBP/MYT<br>1/RBFOX1/GRIN1                                                                                                                                                                        |
| REACTOME_FGFR2C_LIGAND_BINDING_AND_ACT<br>IVATION              | -<br>1.5<br>257<br>395<br>34 | 0.0761<br>0243  | FGF4/FGFR2/FGF23/FGF16/FGF8/FGF9/FGF17                                                                                                                                                                                                                                          |

|                                                                 |                              |                 |                                                                                                                                                                                    |
|-----------------------------------------------------------------|------------------------------|-----------------|------------------------------------------------------------------------------------------------------------------------------------------------------------------------------------|
| REACTOME_NONHOMOLOGOUS_END_JOINING_NHEJ_                        | -<br>1.5<br>269<br>540<br>93 | 0.0598<br>5508  | H4C12/H2BC8/UBE2V2/XRCC4/H4C6/SUMO1/H4-16/BABAM1/H2BU1/H2BC21/H2BC15/H2AX/H2BC6/H2BC4/H2BC9/H2BC7/UBE2N/H4C8/H4C11/H4C15/H2BC13/H2BC14/H4C5/H4C4/H4C1/H4C2/H2BC3/H2BC10/H4C3/H4C13 |
| PID_LIS1_PATHWAY                                                | -<br>1.5<br>275<br>799<br>37 | 0.0943<br>86035 | YWHAE/DYNLT1/CDK5/PFAFH1B3/CDK5R2/DAB1/CDK5R1/DCX/RELN                                                                                                                             |
| REACTOME_GABA_B_RECEPTOR_ACTIVATION                             | -<br>1.5<br>345<br>734<br>74 | 0.0745<br>058   | KCNJ10/GNG7/KCNJ4/ADCY2/GABBR1/GNG2/GNAI1/KCNJ16/GNAL/GABBR2/GNG4/GNG8/KCNJ12/KCNJ3/ADCY5/GNG13/GNG3/KCNJ9                                                                         |
| WP_NOCGMPPKG_MEDIATED_NEUROPROTECTION                           | -<br>1.5<br>373<br>973<br>37 | 0.0623<br>79275 | GUCY1B1/CALM2/CAMK2G/GRIN2A/NEFL/CNGB1/NOS1/GRIN2B/CAMK2A/PDE2A/NPPB/NPPA/GRIN1/PRKG2                                                                                              |
| REACTOME_FORMATION_OF_TUBULIN_FOLDING_INTERMEDIATES_BY_CCT_TRIC | -<br>1.5<br>379<br>756<br>36 | 0.0883<br>82989 | CCT5/TUBB4B/CCT6B/TUBA1B/CCT7/TUBB2A/CCT6A/TUBB2B/CCT3/CCT4/TUBA4B/TUBA4A/TUBAL3/TUBB3/TUBA3C/CCT2/TUBA8/TUBA1A/TUBB4A                                                             |
| REACTOME_HDMS_DEMETHYLATE_HISTONES                              | -<br>1.5<br>390<br>567<br>03 | 0.0623<br>79275 | KDM4D/H4C6/H4-16/KDM1A/KDM5B/H3C12/H3C4/H3C7/H3C1/H4C8/H4C11/H4C15/H3C15/H4C5/H4C4/H4C1/H4C2/H4C3/H3C11/H4C13                                                                      |
| REACTOME_APC_C_MEDIATED_DEGRADATION_OF_CELL_CYCLE_PROTEINS      | -<br>1.5<br>399              | 0.0334<br>9572  | PSMA1/PSMD3/PSMD6/PSMC3/PSMD9/BTRC/PSMA4/PSMD4/CCNA2/PLK1/ANAPC5/UBA52/CCNB1/ANAPC16/ANAPC10/CDK1/NEK2/PSMC6/PSMB7/PSMA5/PSMD14/PSMB5/PSMB4/RPS27A/PSMB6/PSMD8/PTTG1/PS            |

|                                               |                              |                 |                                                                                                                                                                                                                                                                                                   |
|-----------------------------------------------|------------------------------|-----------------|---------------------------------------------------------------------------------------------------------------------------------------------------------------------------------------------------------------------------------------------------------------------------------------------------|
|                                               | 761<br>15                    |                 | MA6/PSMA7/PSMD13/UBE2E1/PSMB1/UBB/AURKB/PSMA2/PSMD10/UBE2C/SKP1/PSMB3/UBE2S/ANAPC15/<br>ANAPC11/MAD2L1                                                                                                                                                                                            |
| KEGG_CALCIIUM_SIGNALING_PATHWAY               | -<br>1.5<br>400<br>564<br>13 | 0.0274<br>06824 | CACNA1A/CALM2/PRKACB/CALML3/CAMK2G/ADCY2/PPP3R2/MYLK3/P2RX5/SLC25A4/TNNC1/ATP2B2/GRI<br>N2A/P2RX7/PLCB1/GRM5/GNAL/CCKBR/HTR2A/DRD1/CACNA1E/PTGER3/HTR6/CACNA1I/NOS1/PDE1A/HTR<br>2C/TACR3/NTSR1/SLC8A2/PDGFR4/CAMK2A/RYR2/ERBB3/CACNA1B/CHP2/PRKCG/CHRM2/SLC8A3/ATP2B<br>3/DRD5/CHRM1/GRIN1/HTR5A |
| REACTOME_DNA_DOUBLE_STRAND_BREAK_RES<br>PONSE | -<br>1.5<br>423<br>907<br>4  | 0.0388<br>07869 | H4C12/H2BC8/UBE2V2/UBA52/H4C6/SUMO1/H4-<br>16/BABAM1/H2BU1/RPS27A/H2BC21/H2BC15/H2AX/H2BC6/UBB/H2BC4/MAPK8/APBB1/H2BC9/H2BC7/UBE2<br>N/H4C8/H4C11/H4C15/H2BC13/EYA1/H2BC14/H4C5/H4C4/H4C1/H4C2/H2BC3/H2BC10/H4C3/H4C13                                                                            |
| WP_NEURAL_CREST_DIFFERENTIATION               | -<br>1.5<br>550<br>973<br>19 | 0.0379<br>91577 | HDAC11/COL11A2/MYB/NEUROG1/MIA/TFAP2B/WNT8A/GBX2/MSX2/DLL1/MPZ/ASCL1/CDH7/DCT/OLIG1/TF<br>AP2A/FGF8/OLIG2/FOXD3/DLX5/GJB1/HES5/DLL3/MBP/PHOX2B/LHX5/LHX1                                                                                                                                          |
| WP_SEROTONIN_AND_ANXIETYRELATED_EVENT<br>S    | -<br>1.5<br>557<br>832<br>85 | 0.0674<br>7676  | HTR2A/HTR2C/CRHR1/HTR1A                                                                                                                                                                                                                                                                           |
| REACTOME_FGFR2_MUTANT_RECEPTOR_ACTIV<br>ATION | -<br>1.5<br>572<br>259<br>53 | 0.0854<br>87216 | POLR2C/FGF22/FGF20/POLR2L/POLR2J/FGF4/POLR2K/FGFR2/POLR2I/FGF23/POLR2G/FGF16/FGF8/FGF9/<br>FGF3/FGF17/POLR2F                                                                                                                                                                                      |
| REACTOME_INWARDLY_RECTIFYING_K_CHANNE<br>LS   | -<br>1.5<br>636<br>961<br>87 | 0.0734<br>98517 | KCNJ10/GNG7/KCNJ4/ABCC8/GABBR1/GNG2/KCNJ16/KCNJ11/GABBR2/GNG4/GNG8/KCNJ12/KCNJ3/GNG13<br>/GNG3/KCNJ9                                                                                                                                                                                              |

|                                                                  |                              |                 |                                                                                                                                                                                                                                                                                               |
|------------------------------------------------------------------|------------------------------|-----------------|-----------------------------------------------------------------------------------------------------------------------------------------------------------------------------------------------------------------------------------------------------------------------------------------------|
| WP_CALCIIUM_REGULATION_IN_THE_CARDIAC_CELL                       | -<br>1.5<br>740<br>961<br>08 | 0.0239<br>69653 | ADRA1B/GNAO1/YWHAE/CASQ1/CACNA1A/CALM2/PRKAR1B/PRKACB/PRKCE/CAMK2G/ATP1B1/ADCY2/ATP2B2/GNG2/GNAI1/GJC2/GJB5/RGS7/PKIA/GNG4/FXYD2/GNG8/KCNJ3/CACNA1E/KCNB1/ADCY5/GNG13/GJB1/GNG3/CAMK2A/GJD2/PRKCZ/RYR2/CACNA1B/GJB6/PRKCG/CHRM2/SLC8A3/ATP2B3/CHRM1                                           |
| REACTOME_ADORA2B_MEDIATED_ANTI_INFLAMMATORY_CYTOKINES_PRODUCTION | -<br>1.5<br>865<br>445<br>91 | 0.0198<br>64398 | CALCB/GNG7/IAPP/HTR4/GPHB5/RAMP1/RLN2/PRKAR1B/PRKACB/GIPR/ADCY2/VIPR1/MC5R/GPR32/ADCYAP1/CGA/RXFP2/GPR150/FSHR/PTH2/GNG2/NPS/GNAI1/AVP/CALCRL/TAAR6/FSHB/CRHR2/PTH2R/GPR45/DRD1/GHRH/GPR27/GNG4/GNG8/NPSR1/GPHA2/GLP2R/HTR6/ADCY5/GNG13/VIPR2/CRHR1/RXFP1/GNG3/VIP/TSHR/MC4R/GPR83/DRD5/GLP1R |
| BIOCARTA_CK1_PATHWAY                                             | -<br>1.5<br>907<br>920<br>52 | 0.0487<br>25038 | PPP3CA/PPP2CA/GRM1/DRD2/PRKAR1B/PRKACB/CDK5/PLCB1/DRD1/CDK5R1/PPP1R1B                                                                                                                                                                                                                         |
| WP_THE_ALTERNATIVE_PATHWAY_OF_FETAL_ANDROGEN_SYNTHESIS           | -<br>1.5<br>918<br>557<br>75 | 0.0714<br>92968 | HSD17B3/CYB5A/SRD5A2/STAR/CYP17A1/AKR1C4/AKR1C2                                                                                                                                                                                                                                               |
| REACTOME_CREATINE_METABOLISM                                     | -<br>1.5<br>950<br>893<br>79 | 0.0714<br>92968 | GAMT/GATM/SLC6A12/CKMT2/CKB/CKMT1B/CKMT1A/SLC6A7                                                                                                                                                                                                                                              |
| REACTOME_INTEGRATION_OF_ENERGY_METABOLISM                        | -<br>1.5<br>953<br>745<br>57 | 0.0200<br>83576 | CACNA1A/ABCC8/PRKAR1B/PRKACB/ADCY2/VAMP2/ADIPOQ/STX1A/ADRA2C/GNG2/GNAI1/PLCB1/RAPGEF4/STXBP1/CACNA2D2/KCNJ11/KCNS3/GNG4/GNG8/CACNA1E/KCNB1/ADCY5/SYT5/GNG13/FFAR1/GNG3/KCNC2/SNAP25/GLP1R                                                                                                     |
| REACTOME_REPRODUCTION                                            | -<br>1.5<br>955              | 0.0199<br>95966 | RPA2/RAD51C/SYCE2/CATSPERD/H4C12/H2BC8/ZP3/H3C13/FKBP6/RAD21/H2AC19/CATSPER4/ADAM21/OVGP1/H4C6/H4-16/SPO11/ADAM30/H2AC6/H3C12/H2BU1/ZP2/H2BC21/H2BC15/CD9/H3-3A/H2AX/H2BC6/H3C4/H3C7/TERF2IP/H2AZ1/SYCE3/H2BC4/IZUMO2/H2BC9/H2BC7/H3C1/H2AC7/IZUMO4/M                                         |

|                                                              |                              |                 |                                                                                                                                                                                                                                                        |
|--------------------------------------------------------------|------------------------------|-----------------|--------------------------------------------------------------------------------------------------------------------------------------------------------------------------------------------------------------------------------------------------------|
|                                                              | 446<br>57                    |                 | ND1/H2AC20/H4C8/H4C11/H4C15/H2BC13/H2BC14/TEX12/H2AC14/H2AC4/H3C15/H4C5/H2AC8/H4C4/H4C1/<br>H4C2/H2AB1/H2BC3/H2BC10/H4C3/H3C11/H4C13/SYCE1/CDK4                                                                                                        |
| REACTOME_POST_CHAPERONIN_TUBULIN_FOLDING_PATHWAY             | -<br>1.5<br>989<br>929<br>78 | 0.0569<br>34034 | TUBA1B/TBCC/TUBB2A/TUBB2B/TUBA4B/TUBA4A/TBCB/TUBAL3/TUBB3/TUBA3C/TBCA/ARL2/TUBA8/TUBA1<br>A/TUBB4A                                                                                                                                                     |
| WP_CELLTYPE_DEPENDENT_SELECTIVITY_OF_CCK2R_SIGNALING         | -<br>1.5<br>995<br>127<br>46 | 0.0390<br>62543 | GNAI1/PLCB1/CCKBR/RYR2/CCK                                                                                                                                                                                                                             |
| REACTOME_ADRENALINE_NORADRENALINE_INHIBITS_INSULIN_SECRETION | -<br>1.5<br>997<br>397<br>35 | 0.0800<br>93872 | ADRA2C/GNG2/GNAI1/CACNA2D2/GNG4/GNG8/ADCY5/GNG13/GNG3                                                                                                                                                                                                  |
| REACTOME_LYSOPHINGOLIPID_AND_LPA_RECEPTORS                   | -<br>1.6<br>011<br>039<br>9  | 0.0548<br>57661 | S1PR5/PLPPR5/LPAR3/PLPPR3/PLPPR1                                                                                                                                                                                                                       |
| REACTOME_TRANSCRIPTIONAL_REGULATION_OF_GRANULOPOIESIS        | -<br>1.6<br>094<br>378<br>57 | 0.0246<br>21212 | H2BC21/H2BC15/H3-<br>3A/H2AX/H2BC6/H3C4/H3C7/H2AZ1/H2BC4/H2BC9/H2BC7/MYB/H3C1/H2AC7/H2AC20/H4C8/H4C11/H4C15/H<br>2BC13/H2BC14/H2AC14/H2AC4/H3C15/H4C5/H2AC8/H4C4/H4C1/H4C2/H2AB1/H2BC3/H2BC10/H4C3/H3C11/<br>H4C13/CDK4                                |
| REACTOME_AMYLOID_FIBER_FORMATION                             | -<br>1.6<br>140<br>800<br>9  | 0.0202<br>31656 | H2BC15/H3-<br>3A/H2AX/H2BC6/H3C4/H3C7/H2AZ1/UBB/SEMG1/H2BC4/IAPP/H2BC9/H2BC7/H3C1/H2AC7/TSPAN15/H2AC20<br>/H4C8/H4C11/H4C15/H2BC13/H2BC14/H2AC14/H2AC4/H3C15/H4C5/TTR/H2AC8/H4C4/APOA4/H4C1/SNCA/H<br>4C2/H2AB1/H2BC3/H2BC10/H4C3/H3C11/PRL/NPPA/H4C13 |

|                                                                  |                              |                 |                                                                                                                                                                                                                                                                                                                                                                                                              |
|------------------------------------------------------------------|------------------------------|-----------------|--------------------------------------------------------------------------------------------------------------------------------------------------------------------------------------------------------------------------------------------------------------------------------------------------------------------------------------------------------------------------------------------------------------|
| REACTOME_EPIGENETIC_REGULATION_OF_GEN<br>E_EXPRESSION            | -<br>1.6<br>177<br>206       | 0.0198<br>64398 | CCNH/H2BC21/GTF2H5/H2BC15/H3-<br>3A/H2AX/H2BC6/H3C4/H3C7/H2AZ1/H2BC4/POLR2K/H2BC9/H2BC7/ZNRD1/H3C1/H2AC7/H2AC20/H4C8/H4C<br>11/H4C15/H2BC13/H2BC14/H2AC14/H2AC4/H3C15/H4C5/H2AC8/H4C4/H4C1/H4C2/H2AB1/H2BC3/H2BC10/H4<br>C3/H3C11/H4C13/POLR2F                                                                                                                                                               |
| WP_FRAGILE_X_SYNDROME                                            | -<br>1.6<br>217<br>137<br>63 | 0.0198<br>64398 | MLST8/ABAT/GRIP1/DNM1/TBC1D7/KCNC1/GRIP2/NTRK2/CYFIP2/GAD1/GRIN2A/PLCB1/GRIA2/GABRD/GR<br>M5/SHANK1/KCND2/AGAP2/PTPN5/DLGAP3/GRIN2B/CAMK2A/GABRB2/GABRG2/SH3GL3/HCN1/GABRA1/G<br>RIN1                                                                                                                                                                                                                        |
| REACTOME_G_PROTEIN_ACTIVATION                                    | -<br>1.6<br>234<br>508<br>75 | 0.0683<br>84289 | GNAZ/POMC/GNG7/GNAT1/GNAO1/GNG2/GNAI1/PDYN/GNG4/GNG8/GNG13/OPRM1/GNG3                                                                                                                                                                                                                                                                                                                                        |
| REACTOME_GLUCAGON_TYPE_LIGAND_RECEPT<br>ORS                      | -<br>1.6<br>252<br>554<br>73 | 0.0551<br>24569 | GIPR/VIPR1/ADCYAP1/GNG2/GHRH/GNG4/GNG8/GLP2R/GNG13/VIPR2/GNG3/VIP/GLP1R                                                                                                                                                                                                                                                                                                                                      |
| REACTOME_MUSCLE_CONTRACTION                                      | -<br>1.6<br>259<br>694<br>68 | 0.0198<br>64398 | FXYD1/TNNI1/TMOD1/RANGRF/MYL3/KCNJ4/GUCY1B1/CACNG8/CASQ1/CACNG7/FKBP1B/CAMK2G/ATP1B<br>1/KCNK4/FGF14/TRIM72/ACTC1/TNNC1/ATP2B2/SCN5A/CACNG4/SCN2B/SCN2A/KCNK9/TBX5/CACNA2D2/K<br>CNK3/KCNJ11/KCNIP3/CACNA2D3/FXYD2/KCNJ12/KCND2/SCN3A/KCNIP4/TRDN/FXYD6/MYBPC1/SCN3B/FX<br>YD7/NOS1/MYL1/SLN/FGF13/FGF12/KCNK1/KCNK12/SLC8A2/KCNIP2/CAMK2A/CACNG2/ATP1A3/NPPA/RYR<br>2/SLC8A3/ATP2B3/CACNG3/FXYD4/TNNT2/MYL2 |
| WP_SUDDEN_INFANT_DEATH_SYNDROME_SIDS_<br>SUSCEPTIBILITY_PATHWAYS | -<br>1.6<br>302<br>617<br>66 | 0.0198<br>64398 | PRKAR1B/PAH/PRKACB/NTRK2/VIPR1/PHOX2A/VAMP2/ADCYAP1/SLC25A4/SCN5A/CHRN2/AVP/MAP2/TH/<br>RET/HTR2A/ASCL1/TAC1/TPH2/LMX1B/TF/TPPP/SCN3B/SST/NKX2-<br>2/VIPR2/CHRNA4/SSTR2/HES5/ATP1A3/RYR2/PHOX2B/PLP1/CHRM2/SNAP25/GABRA1/GRIN1/FEV/HTR1A/S<br>STR1/TLX3                                                                                                                                                      |
| REACTOME_MRNA_SPLICING_MINOR_PATHWAY                             | -<br>1.6<br>374              | 0.0260<br>49679 | POLR2C/POLR2L/SF3B6/SNRNP35/POLR2J/TXNL4A/ZCRB1/SNRPD1/YBX1/SNRPF/SNRPB/SNU13/POLR2K/<br>SF3B5/POLR2I/ZMAT5/POLR2G/SNRPD2/SNRPE/SNRNP25/LSM2/SNRPG/POLR2F                                                                                                                                                                                                                                                    |

|                                                                                           |                              |                 |                                                                                                                                                                                                                                                                                                                                                                                 |
|-------------------------------------------------------------------------------------------|------------------------------|-----------------|---------------------------------------------------------------------------------------------------------------------------------------------------------------------------------------------------------------------------------------------------------------------------------------------------------------------------------------------------------------------------------|
|                                                                                           | 732<br>33                    |                 |                                                                                                                                                                                                                                                                                                                                                                                 |
| REACTOME_CGMP_EFFECTS                                                                     | -<br>1.6<br>393<br>649<br>85 | 0.0331<br>92879 | PDE10A/KCNMB4/PDE1A/KCNMB2/PDE2A/PRKG2                                                                                                                                                                                                                                                                                                                                          |
| REACTOME_ION_TRANSPORT_BY_P_TYPE_ATPASES                                                  | -<br>1.6<br>469<br>857<br>7  | 0.0308<br>15982 | CUTC/ATP10B/ATP1A4/PDZD11/FXYD3/SRI/FXYD1/CAMK2G/ATP1B1/ATP2B2/ATP4A/ATP2C2/ATP8A1/FXYD2/FXYD6/FXYD7/SLN/ATP8A2/CAMK2A/ATP1A3/ATP13A5/ATP2B3/FXYD4                                                                                                                                                                                                                              |
| WP_NICOTINE_ACTIVITY_ON_DOPAMINERGIC_NEURONS                                              | -<br>1.6<br>503<br>267<br>74 | 0.0478<br>02761 | CDK5/ADCY2/GNG2/CHRNA2/GNAI1/TH/KCNK9/KCNK3/PPP1R1B/CHRNA4                                                                                                                                                                                                                                                                                                                      |
| WP_OLIGODENDROCYTE_SPECIFICATION_AND_DIFFERENTIATION_LEADING_TO_MYELIN_COMPONENTS_FOR_CNS | -<br>1.6<br>582<br>570<br>87 | 0.0323<br>06543 | CNP/ASCL1/OLIG1/OLIG2/OMG/NKX2-2/SOX8/MAG/MBP/MOG/MYT1/PLP1                                                                                                                                                                                                                                                                                                                     |
| REACTOME_HCMV_INFECTION                                                                   | -<br>1.6<br>663<br>174<br>25 | 0.0198<br>64398 | TUBB2A/CHMP6/H4C6/VPS37B/TUBB2B/H4-16/VPS25/H2AC6/TUBA4B/H3C12/H2BU1/H2AC16/H2BC21/H2AC17/H2BC15/H2BC6/H3C4/VPS28/TUBA4A/TUBAL3/H3C7/TUBB3/H2BC4/TUBA3C/NUP35/H2BC9/H2BC7/H3C1/DYNLL1/H2AC7/VPS37D/MVB12B/H2AC20/H4C8/H4C11/H4C15/H2BC13/H2AC12/H2BC14/TUBA8/H2AC21/H2AC14/H2AC4/H3C15/H4C5/H2AC8/H4C4/TUBA1A/H4C1/H4C2/H2BC3/H2AW/H2BC10/H4C3/H3C11/DYNC111/H4C13/TUBB4A       |
| REACTOME_GENE_SILENCING_BY_RNA                                                            | -<br>1.6<br>703<br>951<br>38 | 0.0198<br>64398 | TARBP2/H4C12/H2BC8/NUP88/H3C13/FKBP6/H2AC19/POLR2C/TSNAX/TDRKH/H4C6/H4-16/POLR2L/HENMT1/POLR2J/H2AC6/H3C12/PRKRA/RAN/H2BU1/H2BC21/H2BC15/H3-3A/H2AX/H2BC6/H3C4/H3C7/H2AZ1/H2BC4/POLR2K/NUP35/POLR2I/H2BC9/H2BC7/H3C1/H2AC7/PLD6/POLR2G/TDRD9/H2AC20/H4C8/H4C11/H4C15/H2BC13/H2BC14/H2AC14/H2AC4/H3C15/DDX4/H4C5/H2AC8/H4C4/H4C1/H4C2/H2AB1/H2BC3/H2BC10/H4C3/H3C11/H4C13/POLR2F |

|                                                                                               |                              |                 |                                                                                                                                                                                                                                                        |
|-----------------------------------------------------------------------------------------------|------------------------------|-----------------|--------------------------------------------------------------------------------------------------------------------------------------------------------------------------------------------------------------------------------------------------------|
| BIOCARTA_NOS1_PATHWAY                                                                         | -<br>1.6<br>727<br>246<br>66 | 0.0375<br>93629 | DLG4/CALM3/PRKCB/PPP3CB/CALM2/PRKAR1B/PRKACB/GRIN2A/NOS1/GRIN2B/GRIN1                                                                                                                                                                                  |
| REACTOME_ACTIVATION_OF_ANTERIOR_HOX_GENES_IN_HINDBRAIN_DEVELOPMENT_DURING_EARLY_EMBRYOGENESIS | -<br>1.6<br>747<br>306<br>24 | 0.0198<br>64398 | HOXA4/H2BC21/H2BC15/H3-3A/H2AX/H2BC6/H3C4/H3C7/H2AZ1/H2BC4/POLR2K/POLR2I/HOXC4/H2BC9/H2BC7/H3C1/H2AC7/POLR2G/H2AC20/H4C8/H4C11/H4C15/H2BC13/H2BC14/H2AC14/H2AC4/HOXD3/H3C15/H4C5/H2AC8/H4C4/H4C1/H4C2/H2AB1/H2BC3/H2BC10/H4C3/H3C11/HOXD1/H4C13/POLR2F |
| REACTOME_SEROTONIN_RECEPTORS                                                                  | -<br>1.6<br>910<br>578<br>6  | 0.0385<br>57536 | HTR2A/HTR6/HTR2C/HTR5A/HTR1E/HTR1A                                                                                                                                                                                                                     |
| REACTOME_COOPERATION_OF_PREFOLDIN_AND_TRIC_CCT_IN_ACTIN_AND_TUBULIN_FOLDING                   | -<br>1.6<br>914<br>315<br>65 | 0.0220<br>62165 | CCT6B/TUBA1B/CCT7/TUBB2A/CCT6A/TUBB2B/CCT3/CCT4/TUBA4B/PFDN1/PFDN2/TUBA4A/PFDN6/VBP1/TUBAL3/TUBB3/TUBA3C/CCT2/PFDN4/PFDN5/TUBA8/TUBA1A/TUBB4A                                                                                                          |
| WP_MITOCHONDRIAL_CIII_ASSEMBLY                                                                | -<br>1.6<br>924<br>931<br>21 | 0.0198<br>64398 | LYRM7/UQCRB/UQCRC1/UQCR10/UQCC3/UQCRC2/UQCRFS1/CYC1/UQCRH/UQCC2/UQCRQ/UQCR11                                                                                                                                                                           |
| REACTOME_OXIDATIVE_STRESS_INDUCED_SENSCENCE                                                   | -<br>1.7<br>137<br>379<br>31 | 0.0198<br>64398 | H2BC21/H2BC15/H3-3A/H2AX/H2BC6/H3C4/H3C7/H2AZ1/UBB/CBX8/BMI1/H2BC4/MAPK8/H2BC9/CBX2/H2BC7/H3C1/H2AC7/MAPK10/H2AC20/H4C8/H4C11/H4C15/CDKN2D/H2BC13/H2BC14/H2AC14/H2AC4/H3C15/H4C5/H2AC8/H4C4/H4C1/H4C2/H2AB1/H2BC3/H2BC10/H4C3/H3C11/H4C13/CDK4         |
| REACTOME_REGULATION_OF_INSULIN_SECRETION                                                      | -<br>1.7<br>164              | 0.0198<br>64398 | CACNA1A/ABCC8/PRKAR1B/PRKACB/VAMP2/STX1A/ADRA2C/GNG2/GNAI1/PLCB1/RAPGEF4/STXBP1/CACNA2D2/KCNJ11/KCNS3/GNG4/GNG8/CACNA1E/KCNB1/ADCY5/SYT5/GNG13/FFAR1/GNG3/KCNC2/SNAP25/GLP1R                                                                           |



|                                                               |                              |                 |                                                                                                                                                                                                                                                                           |
|---------------------------------------------------------------|------------------------------|-----------------|---------------------------------------------------------------------------------------------------------------------------------------------------------------------------------------------------------------------------------------------------------------------------|
|                                                               | 656<br>58                    |                 |                                                                                                                                                                                                                                                                           |
| REACTOME_P75NTR_REGULATES_AXONOGENESIS                        | -<br>1.7<br>309<br>728<br>96 | 0.0239<br>07265 | RTN4R/LINGO1/OMG/MAG/MCF2                                                                                                                                                                                                                                                 |
| REACTOME_HCMV_EARLY_EVENTS                                    | -<br>1.7<br>322<br>003<br>18 | 0.0198<br>64398 | H2BC21/H2AC17/H2BC15/H2BC6/H3C4/TUBA4A/TUBAL3/H3C7/TUBB3/H2BC4/TUBA3C/NUP35/H2BC9/H2BC7/H3C1/DYNLL1/H2AC7/H2AC20/H4C8/H4C11/H4C15/H2BC13/H2AC12/H2BC14/TUBA8/H2AC21/H2AC14/H2AC4/H3C15/H4C5/H2AC8/H4C4/TUBA1A/H4C1/H4C2/H2BC3/H2AW/H2BC10/H4C3/H3C11/DYNC111/H4C13/TUBB4A |
| REACTOME_NOREPINEPHRINE_NEUROTRANSMITTER_RELEASE_CYCLE        | -<br>1.7<br>392<br>892<br>79 | 0.0198<br>64398 | SLC22A2/PPFIA4/TSP0AP1/VAMP2/STX1A/PPFIA3/STXBP1/CPLX1/RIMS1/RAB3A/SYT1/SNAP25                                                                                                                                                                                            |
| REACTOME_ION_HOMEOSTASIS                                      | -<br>1.7<br>438<br>291<br>55 | 0.0198<br>64398 | FXVD3/SRI/FXVD1/CASQ1/FKBP1B/CAMK2G/ATP1B1/ATP2B2/KCNJ11/FXVD2/TRDN/FXVD6/FXVD7/NOS1/SLN/SLC8A2/CAMK2A/ATP1A3/RYR2/SLC8A3/ATP2B3/FXVD4                                                                                                                                    |
| REACTOME_ACTIVATION_OF_NMDA_RECEPTORS_AND_POSTSYNAPTIC_EVENTS | -<br>1.7<br>461<br>532<br>76 | 0.0198<br>64398 | TUBB2A/PRKAG1/TUBB2B/DLG4/ARHGEF7/TUBA4B/PRKAG2/ERBB4/CAMK4/APBA1/TUBA4A/TUBAL3/TUBB3/TUBA3C/KIF17/PRKAR1B/PPM1E/PRKACB/CAMK2G/GRIA4/MAPT/RASGRF2/CAMKK1/LIN7B/TUBA8/GRIN2A/DLG2/GRIA2/GRIN3A/TUBA1A/NEFL/RASGRF1/GRIN2B/LRRC7/NRGN/CAMK2A/TUBB4A/GRIN1                   |
| REACTOME_MEIOSIS                                              | -<br>1.7<br>498<br>221<br>68 | 0.0198<br>64398 | H2BC21/H2BC15/H3-3A/H2AX/H2BC6/H3C4/H3C7/TERF2IP/H2AZ1/SYCE3/H2BC4/H2BC9/H2BC7/H3C1/H2AC7/MND1/H2AC20/H4C8/H4C11/H4C15/H2BC13/H2BC14/TEX12/H2AC14/H2AC4/H3C15/H4C5/H2AC8/H4C4/H4C1/H4C2/H2AB1/H2BC3/H2BC10/H4C3/H3C11/H4C13/SYCE1/CDK4                                    |

|                                                                    |                              |                 |                                                                                                                                                                                                                                                                                                                                                                                                                                                                                                                                                                                   |
|--------------------------------------------------------------------|------------------------------|-----------------|-----------------------------------------------------------------------------------------------------------------------------------------------------------------------------------------------------------------------------------------------------------------------------------------------------------------------------------------------------------------------------------------------------------------------------------------------------------------------------------------------------------------------------------------------------------------------------------|
| REACTOME_CHROMOSOME_MAINTENANCE                                    | -<br>1.7<br>586<br>065<br>34 | 0.0198<br>64398 | CENPL/RUVBL1/RBBP4/RPA3/RUVBL2/CENPA/CENPS/RPA2/H4C12/CCNA2/H2BC8/CENPK/OIP5/H2AC19/P<br>OLR2C/CENPW/CENPU/H4C6/H4-<br>16/POLR2L/PRIM1/CENPM/POLR2J/PIF1/H2AC6/H2BU1/NOP10/WRAP53/H2BC21/ITGB3BP/H2BC15/H3-<br>3A/H2AX/H2BC6/CENPH/TERF2IP/H2AZ1/H2BC4/POLR2K/POLR2I/CENPQ/H2BC9/H2BC7/H2AC7/POLR2G/N<br>HP2/CENPX/H2AC20/H4C8/H4C11/H4C15/H2BC13/H2BC14/H2AC14/H2AC4/H4C5/H2AC8/H4C4/H4C1/H4C2/H<br>2AB1/H2BC3/H2BC10/H4C3/H4C13/POLR2F                                                                                                                                          |
| REACTOME_FORMATION_OF_THE_BETA_CATENIN_TCF_TRANSACTIVATING_COMPLEX | -<br>1.7<br>645<br>548<br>6  | 0.0198<br>64398 | H2BC21/H2BC15/H3-<br>3A/H2AX/H2BC6/H3C4/H3C7/H2AZ1/H2BC4/H2BC9/H2BC7/H3C1/H2AC7/H2AC20/H4C8/H4C11/H4C15/H2BC1<br>3/H2BC14/H2AC14/H2AC4/H3C15/H4C5/H2AC8/H4C4/H4C1/H4C2/H2AB1/H2BC3/H2BC10/H4C3/H3C11/H4C13                                                                                                                                                                                                                                                                                                                                                                        |
| REACTOME_TELOMERE_MAINTENANCE                                      | -<br>1.7<br>651<br>846<br>27 | 0.0198<br>64398 | RPA3/RUVBL2/RPA2/H4C12/CCNA2/H2BC8/H2AC19/POLR2C/H4C6/H4-<br>16/POLR2L/PRIM1/POLR2J/PIF1/H2AC6/H2BU1/NOP10/WRAP53/H2BC21/H2BC15/H3-<br>3A/H2AX/H2BC6/TERF2IP/H2AZ1/H2BC4/POLR2K/POLR2I/H2BC9/H2BC7/H2AC7/POLR2G/NHP2/H2AC20/H4<br>C8/H4C11/H4C15/H2BC13/H2BC14/H2AC14/H2AC4/H4C5/H2AC8/H4C4/H4C1/H4C2/H2AB1/H2BC3/H2BC10/H<br>4C3/H4C13/POLR2F                                                                                                                                                                                                                                    |
| REACTOME_HCMV_LATE_EVENTS                                          | -<br>1.7<br>677<br>520<br>89 | 0.0198<br>64398 | SEC13/TSG101/H4C12/H2BC8/NUP88/H3C13/H2AC19/CHMP6/H4C6/VPS37B/H4-<br>16/VPS25/H2AC6/H3C12/H2BU1/H2AC16/H2BC21/H2AC17/H2BC15/H2BC6/H3C4/VPS28/H3C7/H2BC4/NUP35/<br>H2BC9/H2BC7/H3C1/H2AC7/VPS37D/MVB12B/H2AC20/H4C8/H4C11/H4C15/H2BC13/H2AC12/H2BC14/H2AC2<br>1/H2AC14/H2AC4/H3C15/H4C5/H2AC8/H4C4/H4C1/H4C2/H2BC3/H2AW/H2BC10/H4C3/H3C11/H4C13                                                                                                                                                                                                                                    |
| KEGG_ALZHEIMERS_DISEASE                                            | -<br>1.7<br>690<br>410<br>53 | 0.0198<br>64398 | NDUFS8/ATP5PD/ATP5F1B/COX4I2/UQCRB/NDUFS7/ATP5F1E/UQCRC1/ATP5F1D/COX6C/NDUFB2/SDHB/N<br>DUFC1/PPP3CB/NDUFS5/UQCR10/BAD/COX5A/NDUFA8/NDUFS3/NDUFA1/APBB1/UQCRC2/ATP5PB/NDUFA<br>6/ATP5MC3/ATP5MC2/NDUFV2/UQCRHL/NDUFB3/NDUFS4/NDUFA9/UQCRFS1/COX7A2L/COX7C/COX6B1/C<br>OX8A/ATP5PF/NDUFA7/CALM2/NDUFA3/NDUFB10/ATP5F1C/CDK5/CALML3/NDUFB4/PPP3R2/NDUFC2/CYC<br>1/COX4I1/UQCRH/MAPT/NDUFB6/NDUFB8/NDUFB1/ATP5PO/UQCRQ/BID/NDUFAB1/COX5B/NDUFB5/NDUFA<br>2/UQCR11/COX7B/ATP5MC1/NDUFB7/GRIN2A/NDUFB9/COX7B2/COX6A1/PLCB1/COX7A2/NDUFA4/COX6A2/<br>SNCA/CDK5R1/NOS1/GRIN2B/CHP2/GRIN1 |
| REACTOME_MITOCHONDRIAL_PROTEIN_IMPORT                              | -<br>1.7<br>707<br>253<br>78 | 0.0198<br>64398 | TIMM22/TIMM8A/TIMM44/TIMM21/PMPCA/TIMM17A/ACO2/BCS1L/SLC25A6/TIMM9/GFER/TOMM20/ATP5F1A/<br>TIMM23/MTX2/CHCHD10/LDHD/ATP5F1B/COA6/TIMM13/COA4/TOMM5/COX17/HSCB/TIMM17B/DNAJC19/TIM<br>M50/PAM16/CHCHD5/CMC2/CYC1/TIMM10/NDUFB8/TOMM22/SLC25A4/CHCHD2/ATP5MC1/OTC/TIMM8B                                                                                                                                                                                                                                                                                                            |

|                                                                  |                              |                 |                                                                                                                                                                                                         |
|------------------------------------------------------------------|------------------------------|-----------------|---------------------------------------------------------------------------------------------------------------------------------------------------------------------------------------------------------|
| REACTOME_ACETYLCHOLINE_NEUROTRANSMITTER_RELEASE_CYCLE            | -<br>1.7<br>721<br>357<br>38 | 0.0198<br>64398 | SLC5A7/PPFIA4/SLC18A3/TSP0AP1/VAMP2/STX1A/PPFIA3/STXBP1/CPLX1/RIMS1/RAB3A/SYT1/SNAP25                                                                                                                   |
| WP_MONOAMINE_GPCRS                                               | -<br>1.7<br>872<br>947<br>36 | 0.0198<br>64398 | ADRA2C/HTR2A/DRD1/HTR6/HTR2C/CHRM2/DRD5/CHRM1/HTR5A/HTR1E/HTR1A                                                                                                                                         |
| REACTOME_ORGANIC_ANION_TRANSPORTERS                              | -<br>1.7<br>880<br>104<br>72 | 0.0198<br>64398 | SLC5A8/SLC17A6/SLC17A8/SLC17A7                                                                                                                                                                          |
| REACTOME_PRESYNAPTIC_DEPOLARIZATION_AND_CALCIIUM_CHANNEL_OPENING | -<br>1.8<br>016<br>067<br>82 | 0.0198<br>64398 | CACNA1A/CACNG4/CACNA2D2/CACNA2D3/CACNA1E/CACNG2/CACNA1B                                                                                                                                                 |
| REACTOME_LGI_ADAM_INTERACTIONS                                   | -<br>1.8<br>027<br>093<br>73 | 0.0198<br>64398 | LG11/CACNG8/ADAM11/STX1A/CACNG4/STX1B/CACNG2/LGI3/CACNG3                                                                                                                                                |
| REACTOME_NEUROTOXICITY_OF_CLOSTRIDIUM_TOXINS                     | -<br>1.8<br>101<br>243<br>56 | 0.0198<br>64398 | VAMP1/SYT2/VAMP2/STX1A/SV2C/STX1B/SV2B/SYT1/SNAP25                                                                                                                                                      |
| REACTOME_HATS_ACETYLATE_HISTONES                                 | -<br>1.8<br>115              | 0.0198<br>64398 | H4C6/SUPT3H/MORF4L2/H4-16/SGF29/H2AC6/MORF4L1/TAF9/H3C12/H2BU1/H2AC16/ACTL6A/ELP6/H2BC21/H2AC17/H2BC15/H2BC6/H3C4/TADA1/H3C7/ELP5/H2BC4/VPS72/H2BC9/H2BC7/KANSL2/H3C1/H2AC7/JADE3/H2AC20/H4C8/H4C11/H4C |

|                                                        |                              |                 |                                                                                                                                                                                                                                                                                                                                                                                                                                                                                                                                           |
|--------------------------------------------------------|------------------------------|-----------------|-------------------------------------------------------------------------------------------------------------------------------------------------------------------------------------------------------------------------------------------------------------------------------------------------------------------------------------------------------------------------------------------------------------------------------------------------------------------------------------------------------------------------------------------|
|                                                        | 314<br>07                    |                 | 15/ING4/H2BC13/H2AC12/H2BC14/H2AC21/H2AC14/H2AC4/H3C15/H4C5/H2AC8/H4C4/H4C1/H4C2/H2BC3/H2AW/H2BC10/YEATS4/H4C3/H3C11/H4C13                                                                                                                                                                                                                                                                                                                                                                                                                |
| REACTOME_DNA_DAMAGE_TELOMERE_STRESS_INDUCED_SENESCENCE | -<br>1.8<br>116<br>236<br>12 | 0.0198<br>64398 | H2BU1/CDKN1B/ASF1A/H2BC21/H1-1/H2BC15/H2AX/H1-2/H2BC6/TERF2IP/H2AZ1/H2BC4/H2BC9/H2BC7/H2AC7/H1-3/H2AC20/H4C8/H4C11/H4C15/H2BC13/H1-4/H2BC14/H2AC14/H2AC4/H4C5/H2AC8/H4C4/H4C1/H4C2/H2AB1/H2BC3/H1-5/H2BC10/H4C3/H4C13                                                                                                                                                                                                                                                                                                                     |
| REACTOME_TRAFFICKING_OF_AMPA_RECEPTORS                 | -<br>1.8<br>133<br>795<br>13 | 0.0198<br>64398 | PRKCB/GRIP1/CACNG8/GRIP2/CAMK2G/GRIA4/TSPAN7/CACNG4/GRIA2/CAMK2A/CACNG2/PRKCG/CACNG3                                                                                                                                                                                                                                                                                                                                                                                                                                                      |
| REACTOME_FORMATION_OF_ATP_BY_CHEMIOSMOTIC_COUPLING     | -<br>1.8<br>140<br>554<br>11 | 0.0198<br>64398 | ATP5F1A/ATP5PD/ATP5F1B/ATP5F1E/ATP5F1D/ATP5PB/ATP5MC3/ATP5MC2/ATP5PF/ATP5F1C/ATP5MF/ATP5PO/ATP5MG/ATP5ME/ATP5MC1                                                                                                                                                                                                                                                                                                                                                                                                                          |
| REACTOME_TRANSCRIPTIONAL_REGULATION_BY_SMALL_RNAS      | -<br>1.8<br>151<br>225<br>97 | 0.0198<br>64398 | H4C12/H2BC8/NUP88/H3C13/H2AC19/POLR2C/H4C6/H4-16/POLR2L/POLR2J/H2AC6/H3C12/RAN/H2BU1/H2BC21/H2BC15/H3-3A/H2AX/H2BC6/H3C4/H3C7/H2AZ1/H2BC4/POLR2K/NUP35/POLR2I/H2BC9/H2BC7/H3C1/H2AC7/POLR2G/H2AC20/H4C8/H4C11/H4C15/H2BC13/H2BC14/H2AC14/H2AC4/H3C15/H4C5/H2AC8/H4C4/H4C1/H4C2/H2AB1/H2BC3/H2BC10/H4C3/H3C11/H4C13/POLR2F                                                                                                                                                                                                                 |
| WP_COMMON_PATHWAYS_UNDERLYING_DRUG_ADDICTION           | -<br>1.8<br>174<br>678<br>26 | 0.0198<br>64398 | CALM2/PRKACB/GRIA4/GNAI1/GRIN2A/GRIA2/GRM5/DRD1/PPP1R1A/GJB1/CAMK2A/PRKCG/GRIN1                                                                                                                                                                                                                                                                                                                                                                                                                                                           |
| REACTOME_METABOLISM_OF_AMINO_ACIDS_AND_DERIVATIVES     | -<br>1.8<br>238<br>176<br>77 | 0.0198<br>64398 | GAMT/CBSL/SLC45A2/RPS20/OAT/DDC/RPL22/ADO/GATM/RPS2/LIPT1/CPS1/UBA52/GSTZ1/AHCY/ECHS1/PSPH/SLC6A12/RPL37/RPS28/PYCR3/PSMC6/RPLP1/PCBD1/PSMB7/PDHB/RPL6/PSMA5/GCDH/PAPSS1/RPL23A/RPL12/HIBCH/GNMT/RPL10/PSMD14/GOT2/RPS17/PYCR1/PHGDH/CKMT2/LIAS/RPL23/RPS27/PSMB5/PSMB4/RPLP0/RPS27A/RPL14/EEF1E1/GPT2/SERINC5/PSMB6/PSMD8/RPL30/RPL26/OAZ1/RPLP2/RPL13/HNMT/PSMA6/RPL36A/RPL19/ASRGL1/GPT/PSMA7/BHMT/RPS24/TST/PSMD13/AADAT/RPL17/MARS1/PSMB1/RPL8/OAZ3/TSTD1/KYAT1/RPL10A/RPS23/TXN2/RPL41/MPST/RPL13A/FOLH1/PXMP2/RPL26L1/RPS15/RPS19/ |

|                                                                                           |                              |                 |                                                                                                                                                                                                                                                                                                                                                                                                                                                                                                                     |
|-------------------------------------------------------------------------------------------|------------------------------|-----------------|---------------------------------------------------------------------------------------------------------------------------------------------------------------------------------------------------------------------------------------------------------------------------------------------------------------------------------------------------------------------------------------------------------------------------------------------------------------------------------------------------------------------|
|                                                                                           |                              |                 | GCAT/GCSH/RPS25/RPS13/PSMA2/PSMD10/ENOPH1/RPL18/RPL34/RPS6/TPO/RPL21/ODC1/PRODH/RPS9/AFMID/RPL5/RPL37A/GRHPR/RPS8/ARG2/RPL7A/PSMB3/RPL22L1/PPM1K/RPL38/RPL36/RPS29/RPL15/RPL35A/RPL29/PAH/GLUD1/RPL31/RPL27A/RPS11/RPS15A/CKB/RIDA/RPS26/RPS3/RPS14/FAU/RIMKLA/RPS16/RPS5/RPL32/RPSA/PSTK/RPS7/RPL39/RPS10/RPS21/RPL18A/GOT1/RPL35/RPS18/QDPR/RPS4Y1/NDUFAB1/CGA/RPL27/RPL24/RPS4Y2/GLS2/PSAT1/OTC/RPL9/TH/ASPA/TYRP1/OCA2/RPS3A/SLC44A1/DCT/INMT/TPH2/TYR/CARNS1/PNMT/CKMT1B/CKMT1A/DAO/SLC25A21/AGXT2/SLC6A7/CRYM |
| BIOCARTA_GABA_PATHWAY                                                                     | -<br>1.8<br>254<br>303<br>18 | 0.0198<br>64398 | GABRA4/GABRA2/GABRA6/GABRA5/GABRA3/GABRA1                                                                                                                                                                                                                                                                                                                                                                                                                                                                           |
| REACTOME_AMINE_LIGAND_BINDING_RECEPTORS                                                   | -<br>1.8<br>304<br>221<br>71 | 0.0198<br>64398 | ADRA2C/TAAR6/HTR2A/DRD1/HTR6/HTR2C/CHRM2/DRD5/CHRM1/HTR5A/HRH3/HTR1E/HTR1A                                                                                                                                                                                                                                                                                                                                                                                                                                          |
| REACTOME_MEIOTIC_SYNAPSIS                                                                 | -<br>1.8<br>312<br>834<br>4  | 0.0198<br>64398 | H2BC21/H2BC15/H2AX/H2BC6/TERF2IP/H2AZ1/SYCE3/H2BC4/H2BC9/H2BC7/H2AC7/H2AC20/H4C8/H4C11/H4C15/H2BC13/H2BC14/TEX12/H2AC14/H2AC4/H4C5/H2AC8/H4C4/H4C1/H4C2/H2AB1/H2BC3/H2BC10/H4C3/H4C13/SYCE1                                                                                                                                                                                                                                                                                                                         |
| REACTOME_CREB1_PHOSPHORYLATION_THROUGH_NMDA_RECEPTOR_MEDIATED_ACTIVATION_OF_RAS_SIGNALING | -<br>1.8<br>351<br>038<br>87 | 0.0198<br>64398 | CAMK2G/RASGRF2/DLG2/NEFL/RASGRF1/GRIN2B/LRRC7/CAMK2A/GRIN1                                                                                                                                                                                                                                                                                                                                                                                                                                                          |
| REACTOME_ASSEMBLY_AND_CELL_SURFACE_PPRESENTATION_OF_NMDA_RECEPTORS                        | -<br>1.8<br>388<br>531<br>47 | 0.0198<br>64398 | APBA1/TUBA4A/TUBAL3/TUBB3/TUBA3C/KIF17/CAMK2G/LIN7B/TUBA8/GRIN2A/DLG2/GRIN3A/TUBA1A/NEFL/GRIN2B/LRRC7/CAMK2A/TUBB4A/GRIN1                                                                                                                                                                                                                                                                                                                                                                                           |

|                                                                                                                        |                              |                 |                                                                                                                                                                                                                                                                                                                                                                                                                                                                                                                                                                                                  |
|------------------------------------------------------------------------------------------------------------------------|------------------------------|-----------------|--------------------------------------------------------------------------------------------------------------------------------------------------------------------------------------------------------------------------------------------------------------------------------------------------------------------------------------------------------------------------------------------------------------------------------------------------------------------------------------------------------------------------------------------------------------------------------------------------|
| REACTOME_RUNX1_REGULATES_TRANSCRIPTIO<br>N_OF_GENES_INVOLVED_IN_DIFFERENTIATION_<br>OF_HSCS                            | -<br>1.8<br>449<br>254<br>17 | 0.0198<br>64398 | PSMB7/PSMA5/H2AC6/TCF12/H3C12/PSMD14/H2BU1/PSMB5/PSMB4/RPS27A/PSMB6/PSMD8/CCNH/PSMA6/<br>H2BC21/PSMA7/PSMD13/H2BC15/H3-<br>3A/H2AX/PSMB1/H2BC6/H3C4/H3C7/H2AZ1/UBB/H2BC4/PSMA2/PSMD10/H2BC9/H2BC7/MYB/H3C1/H2AC7/P<br>SMB3/H2AC20/H4C8/H4C11/H4C15/H2BC13/LMO1/H2BC14/H2AC14/H2AC4/H3C15/H4C5/H2AC8/H4C4/H4C1/<br>H4C2/H2AB1/H2BC3/H2BC10/H4C3/H3C11/H4C13                                                                                                                                                                                                                                       |
| REACTOME_ACTIVATION_OF_THE_MRNA_UPON_<br>BINDING_OF_THE_CAP_BINDING_COMPLEX_AND<br>_EIFS_AND_SUBSEQUENT_BINDING_TO_43S | -<br>1.8<br>553<br>121<br>91 | 0.0198<br>64398 | RPS20/EIF3H/RPS2/EIF3K/RPS28/EIF4E/EIF3E/EIF3I/RPS17/RPS27/RPS27A/EIF4A2/RPS24/RPS23/RPS15/R<br>PS19/RPS25/RPS13/RPS6/RPS9/RPS8/RPS29/RPS11/RPS15A/RPS26/RPS3/RPS14/FAU/RPS16/RPS5/RPSA/<br>RPS7/RPS10/RPS21/RPS18/RPS4Y1/RPS4Y2/RPS3A                                                                                                                                                                                                                                                                                                                                                           |
| REACTOME_BASE_EXCISION_REPAIR                                                                                          | -<br>1.8<br>586<br>364<br>14 | 0.0198<br>64398 | H2BC21/H2BC15/H2AX/POLE3/H2BC6/TERF2IP/H2AZ1/H2BC4/POLE4/H2BC9/H2BC7/H2AC7/MPG/NTHL1/PO<br>LB/H2AC20/H4C8/H4C11/H4C15/H2BC13/H2BC14/H2AC14/H2AC4/H4C5/H2AC8/H4C4/H4C1/H4C2/H2AB1/H2<br>BC3/H2BC10/H4C3/H4C13                                                                                                                                                                                                                                                                                                                                                                                     |
| REACTOME_NEGATIVE_REGULATION_OF_NMDA_<br>RECEPTOR_MEDIATED_NEURONAL_TRANSMISSI<br>ON                                   | -<br>1.8<br>690<br>894<br>86 | 0.0198<br>64398 | PPM1E/CAMK2G/GRIN2A/DLG2/NEFL/GRIN2B/LRRC7/CAMK2A/GRIN1                                                                                                                                                                                                                                                                                                                                                                                                                                                                                                                                          |
| REACTOME_INFLUENZA_INFECTION                                                                                           | -<br>1.8<br>716<br>750<br>87 | 0.0198<br>64398 | RPS12/RPL3/NUP88/SLC25A6/RPS20/RPL22/RPS2/UBA52/POLR2C/RPL37/RPS28/POLR2L/KPNA5/RPLP1/PO<br>LR2J/RPL6/RPL23A/RPL12/RPL10/RAN/CLTA/RPS17/RPL23/RPS27/RPLP0/RPS27A/RPL14/RPL30/RPL26/RPL<br>P2/RPL13/RPL36A/RPL19/RPS24/RPL17/RPL8/RPL10A/RPS23/RPL41/RPL13A/POLR2K/RPL26L1/RPS15/RPS<br>19/NUP35/POLR2I/RPS25/RPS13/RPL18/RPL34/RPS6/RPL21/RPS9/RPL5/RPL37A/RPS8/RPL7A/RPL22L1/RPL<br>38/RPL36/RPS29/RPL15/RPL35A/RPL29/POLR2G/RPL31/RPL27A/RPS11/RPS15A/RPS26/RPS3/RPS14/FAU/R<br>PS16/RPS5/RPL32/RPSA/RPS7/RPL39/RPS10/RPS21/RPL18A/RPL35/RPS18/RPS4Y1/RPL27/RPL24/RPS4Y2/<br>RPL9/RPS3A/POLR2F |
| REACTOME_PHASE_0_RAPID_DEPOLARISATION                                                                                  | -<br>1.8<br>768<br>552       | 0.0198<br>64398 | RANGRF/CACNG8/CACNG7/CAMK2G/FGF14/SCN5A/CACNG4/SCN2B/SCN2A/CACNA2D2/CACNA2D3/SCN3<br>A/SCN3B/FGF13/FGF12/CAMK2A/CACNG2/CACNG3                                                                                                                                                                                                                                                                                                                                                                                                                                                                    |
| REACTOME_POSITIVE_EPIGENETIC_REGULATIO<br>N_OF_RRNA_EXPRESSION                                                         | -<br>1.8                     | 0.0198<br>64398 | KAT2B/H4C12/H2BC8/H3C13/HDAC2/TAF1D/H2AC19/H4C6/H4-<br>16/POLR2L/H2AC6/H3C12/H2BU1/H2BC21/H2BC15/H3-                                                                                                                                                                                                                                                                                                                                                                                                                                                                                             |

|                                                           |                              |                 |                                                                                                                                                                                                                                                                                                                                 |
|-----------------------------------------------------------|------------------------------|-----------------|---------------------------------------------------------------------------------------------------------------------------------------------------------------------------------------------------------------------------------------------------------------------------------------------------------------------------------|
|                                                           | 772<br>419<br>62             |                 | 3A/H2AX/H2BC6/H3C4/H3C7/H2AZ1/H2BC4/POLR2K/H2BC9/H2BC7/ZNRD1/H3C1/H2AC7/H2AC20/H4C8/H4C11/H4C15/H2BC13/H2BC14/H2AC14/H2AC4/H3C15/H4C5/H2AC8/H4C4/H4C1/H4C2/H2AB1/H2BC3/H2BC10/H4C3/H3C11/H4C13/POLR2F                                                                                                                           |
| WP_DISRUPTION_OF_POSTSYNAPTIC_SIGNALLING_BY_CNV           | -<br>1.8<br>856<br>872<br>08 | 0.0198<br>64398 | NRXN2/CAMK2G/STX1A/NRXN1/DLGAP1/GRIN2A/DLG2/SHANK1/GRIN2B/CAMK2A/RYR2/GRIN1                                                                                                                                                                                                                                                     |
| WP_MBDNF_AND_PROBDNF_REGULATION_OF_GABA_NEUROTRANSMISSION | -<br>1.8<br>916<br>324<br>91 | 0.0198<br>64398 | NTRK2/GABRQ/GABRA4/GABRD/GABRA2/GABRB3/GABRP/GABRG1/GABRA6/SLC12A5/GABRG3/GABRB2/GABRA5/GABRG2/GABRA3/GABRA1                                                                                                                                                                                                                    |
| REACTOME_CARDIAC_CONDUCTION                               | -<br>1.8<br>936<br>103<br>61 | 0.0198<br>64398 | FXVD1/RANGRF/KCNJ4/CACNG8/CASQ1/CACNG7/FKBP1B/CAMK2G/ATP1B1/KCNK4/FGF14/ATP2B2/SCN5A/CACNG4/SCN2B/SCN2A/KCNK9/TBX5/CACNA2D2/KCNK3/KCNJ11/KCNIP3/CACNA2D3/FXYD2/KCNJ12/KCNKD2/SCN3A/KCNIP4/TRDN/FXYD6/SCN3B/FXYD7/NOS1/SLN/FGF13/FGF12/KCNK1/KCNK12/SLC8A2/KCNIP2/CAMK2A/CACNG2/ATP1A3/NPPA/RYR2/SLC8A3/ATP2B3/CACNG3/FXYD4      |
| REACTOME_MEIOTIC_RECOMBINATION                            | -<br>1.8<br>955<br>843<br>89 | 0.0198<br>64398 | H2BC21/H2BC15/H3-<br>3A/H2AX/H2BC6/H3C4/H3C7/H2AZ1/H2BC4/H2BC9/H2BC7/H3C1/H2AC7/MND1/H2AC20/H4C8/H4C11/H4C15/H2BC13/H2BC14/H2AC14/H2AC4/H3C15/H4C5/H2AC8/H4C4/H4C1/H4C2/H2AB1/H2BC3/H2BC10/H4C3/H3C11/H4C13/CDK4                                                                                                                |
| REACTOME_RNA_POLYMERASE_I_TRANSCRIPTION                   | -<br>1.8<br>994<br>636<br>76 | 0.0198<br>64398 | MAPK3/KAT2B/H4C12/H2BC8/H3C13/HDAC2/TAF1D/H2AC19/H4C6/H4-<br>16/POLR2L/H2AC6/H3C12/H2BU1/CCNH/H2BC21/GTF2H5/H2BC15/H3-<br>3A/H2AX/H2BC6/H3C4/H3C7/H2AZ1/H2BC4/POLR2K/H2BC9/H2BC7/ZNRD1/H3C1/H2AC7/H2AC20/H4C8/H4C11/H4C15/H2BC13/H2BC14/H2AC14/H2AC4/H3C15/H4C5/H2AC8/H4C4/H4C1/H4C2/H2AB1/H2BC3/H2BC10/H4C3/H3C11/H4C13/POLR2F |
| REACTOME_CRISTAE_FORMATION                                | -<br>1.9<br>033<br>771<br>05 | 0.0198<br>64398 | DMAC2L/MICOS10/ATP5F1A/MTX2/APOO/ATP5PD/ATP5F1B/ATP5F1E/ATP5F1D/ATP5PB/ATP5MC3/ATP5MC2/ATP5PF/ATP5F1C/ATP5MF/MICOS13/ATP5PO/ATP5MG/ATP5ME/ATP5MC1/CHCHD6                                                                                                                                                                        |

|                                                                |                              |                 |                                                                                                                                                                                                                                                                                                                                                                                                                                                                                                                                                                                                                                                                                                                   |
|----------------------------------------------------------------|------------------------------|-----------------|-------------------------------------------------------------------------------------------------------------------------------------------------------------------------------------------------------------------------------------------------------------------------------------------------------------------------------------------------------------------------------------------------------------------------------------------------------------------------------------------------------------------------------------------------------------------------------------------------------------------------------------------------------------------------------------------------------------------|
| REACTOME_SIGNALING_BY_ROBO_RECEPTORS                           | -<br>1.9<br>045<br>386<br>48 | 0.0198<br>64398 | PSMB7/RPL6/PSMA5/SRGAP3/AKAP5/RPL23A/RPL12/RPL10/PSMD14/RPS17/RPL23/FLRT3/RPS27/PSMB5/P<br>SMB4/RPLP0/RPS27A/RPL14/PSMB6/PAK6/PSMD8/RPL30/RPL26/LHX4/RPLP2/RPL13/PSMA6/RPL36A/RPL1<br>9/ELOC/PSMA7/SLIT1/RPS24/PSMD13/RPL17/PSMB1/RPL8/RPL10A/RPS23/RPL41/UBB/PPP3CB/RPL13A/RP<br>L26L1/RPS15/RPS19/RPS25/RPS13/PSMA2/PSMD10/RPL18/RPL34/RPS6/RPL21/RPS9/RPL5/RPL37A/RPS8/R<br>PL7A/PSMB3/RPL22L1/RPL38/RPL36/RPS29/RPL15/RPL35A/RPL29/PRKACB/RPL31/RPL27A/RPS11/RPS15A/<br>RPS26/RPS3/RPS14/FAU/RPS16/RPS5/RPL32/RPSA/RPS7/RPL39/RBX1/RPS10/RPS21/RPL18A/RPL35/RPS1<br>8/RPS4Y1/RPL27/RPL24/RPS4Y2/ELOB/RPL9/LHX3/RPS3A/CLASP2/DCC/PAK3/PFN2/PAK5                                                                |
| REACTOME_RHO_GTPASES_ACTIVATE_PKNS                             | -<br>1.9<br>113<br>045<br>42 | 0.0198<br>64398 | CDC25C/H2BC21/RHOC/H2BC15/MYL6/H3-<br>3A/H2AX/H2BC6/H3C4/YWHAQ/H3C7/H2AZ1/H2BC4/YWHAQ/H2BC9/H2BC7/H3C1/H2AC7/H2AC20/H4C8/H4C<br>11/H4C15/H2BC13/H2BC14/H2AC14/H2AC4/H3C15/H4C5/H2AC8/H4C4/H4C1/H4C2/H2AB1/PPP1R14A/H2BC3/<br>H2BC10/H4C3/H3C11/H4C13                                                                                                                                                                                                                                                                                                                                                                                                                                                              |
| REACTOME_LONG_TERM_POTENTIATION                                | -<br>1.9<br>147<br>181<br>07 | 0.0198<br>64398 | CAMK2G/GRIN2A/DLG2/GRIA2/NEFL/GRIN2B/LRRC7/NRGN/CAMK2A/GRIN1                                                                                                                                                                                                                                                                                                                                                                                                                                                                                                                                                                                                                                                      |
| REACTOME_NEGATIVE_EPIGENETIC_REGULATIO<br>N_OF_RRNA_EXPRESSION | -<br>1.9<br>283<br>464<br>87 | 0.0198<br>64398 | H4C12/H2BC8/H3C13/HDAC2/TAF1D/H2AC19/SAP18/H4C6/H4-<br>16/POLR2L/H2AC6/H3C12/H2BU1/CCNH/H2BC21/GTF2H5/H2BC15/H3-<br>3A/H2AX/H2BC6/H3C4/H3C7/H2AZ1/H2BC4/POLR2K/H2BC9/H2BC7/ZNRD1/H3C1/H2AC7/H2AC20/H4C8/H4C<br>11/H4C15/H2BC13/H2BC14/H2AC14/H2AC4/H3C15/H4C5/H2AC8/H4C4/H4C1/H4C2/H2AB1/H2BC3/H2BC10/H4<br>C3/H3C11/H4C13/POLR2F                                                                                                                                                                                                                                                                                                                                                                                 |
| KEGG_HUNTINGTONS_DISEASE                                       | -<br>1.9<br>287<br>962<br>23 | 0.0198<br>64398 | CREB3/POLR2C/ATP5MC1P5/NDUFA5/SDHC/GPX1/PLCB4/POLR2L/DLG4/VDAC2/ATP5F1A/CASP9/POLR2J/<br>CYCS/CLTA/SDHD/SOD1/NDUFS8/ATP5PD/DNAH2/ATP5F1B/COX4I2/SLC25A5/UQCRB/NDUFS7/ATP5F1E/U<br>QCRC1/ATP5F1D/COX6C/NDUFB2/SDHB/VDAC3/NDUFC1/TBPL2/NDUFS5/UQCR10/POLR2K/COX5A/NDUFA<br>8/POLR2I/NDUFS3/NDUFA1/DNAI2/UQCRC2/ATP5PB/NDUFA6/ATP5MC3/ATP5MC2/NDUFV2/UQCRHL/NDUF<br>B3/NDUFS4/NDUFA9/UQCRFS1/COX7A2L/COX7C/COX6B1/COX8A/ATP5PF/NDUFA7/POLR2G/NDUFA3/NDU<br>FB10/ATP5F1C/DNAI1/NDUFB4/NDUFC2/CYC1/COX4I1/UQCRH/TBPL1/NDUFB6/NDUFB8/NDUFB1/ATP5PO/U<br>QCRQ/NDUFAB1/COX5B/SLC25A4/NDUFB5/NDUFA2/UQCR11/COX7B/DCTN2/ATP5MC1/NDUFB7/NDUFB9/C<br>OX7B2/COX6A1/PLCB1/GRM5/COX7A2/CREB3L3/NDUFA4/COX6A2/GRIN2B/POLR2F/GRIN1 |
| REACTOME_HDACS_DEACETYLATE_HISTONES                            | -<br>1.9                     | 0.0198<br>64398 | H4C12/H2BC8/H3C13/HDAC2/H2AC19/SAP18/H4C6/H4-<br>16/KDM1A/H2AC6/H3C12/H2BU1/H2AC16/H2BC21/H2AC17/H2BC15/H2BC6/H3C4/H3C7/H2BC4/H2BC9/H2BC                                                                                                                                                                                                                                                                                                                                                                                                                                                                                                                                                                          |



|                                                                         |                              |                 |                                                                                                                                                                                                                                                                                                                                                                                                                                                                                                                                                                                                                                                                              |
|-------------------------------------------------------------------------|------------------------------|-----------------|------------------------------------------------------------------------------------------------------------------------------------------------------------------------------------------------------------------------------------------------------------------------------------------------------------------------------------------------------------------------------------------------------------------------------------------------------------------------------------------------------------------------------------------------------------------------------------------------------------------------------------------------------------------------------|
|                                                                         | 334<br>417                   |                 | 7/H3C1/H2AC7/H2AC20/H4C8/H4C11/H4C15/H2BC13/H2AC12/H2BC14/H2AC21/H2AC14/H2AC4/H3C15/H4C5/H2AC8/H4C4/H4C1/H4C2/H2BC3/H2AW/H2BC10/H4C3/H3C11/H4C13                                                                                                                                                                                                                                                                                                                                                                                                                                                                                                                             |
| REACTOME_RRNA_PROCESSING                                                | -<br>1.9<br>348<br>147<br>31 | 0.0198<br>64398 | RPP30/WDR12/EXOSC1/RPS12/HSD17B10/EBNA1BP2/RPL3/MRM3/RPS20/DDX49/RPL22/RPS2/UBA52/SEN P3/PNO1/WDR18/RPL37/RPS28/RPL1/RPL6/BOP1/MPHOSPH6/EXOSC7/RPL23A/RPL12/EXOSC8/RPL10/RP S17/TRMT10C/RPL23/RPS27/DIMT1/RPLP0/EXOSC4/RPS27A/CSNK1E/RPL14/PWP2/NOP10/RPL30/IMP3/RP L26/EMG1/RPLP2/RPL13/RPL36A/RPL19/C1D/RPS24/TRMT112/RPP21/RPL17/RPL8/RPL10A/RPS23/RPL41/S NU13/RPL13A/RPL26L1/RPS15/RPS19/RPS25/RPS13/RPL18/RPL34/RPS6/RPL21/RPS9/RPL5/RPL37A/RPS8/ RPL7A/RPL22L1/RPL38/RPL36/RPS29/RPL15/RPL35A/RPL29/EXOSC5/NHP2/RPL31/RPL27A/RPS11/RPS15A/ RPS26/RPS3/RPS14/FAU/RPS16/RPS5/RPL32/RPSA/RPS7/RPL39/RPS10/RPS21/RPL18A/RPL35/RPS18/RPS 4Y1/RPL27/RPL24/RPS4Y2/RPL9/RPS3A |
| REACTOME_RAS_ACTIVATION_UPON_CA2_INFLU X_THROUGH_NMDA_RECEPTOR          | -<br>1.9<br>379<br>270<br>27 | 0.0198<br>64398 | CAMK2G/RASGRF2/DLG2/NEFL/RASGRF1/GRIN2B/LRRC7/CAMK2A/GRIN1                                                                                                                                                                                                                                                                                                                                                                                                                                                                                                                                                                                                                   |
| REACTOME_B_WICH_COMPLEX_POSITIVELY_RE GULATES_RRNA_EXPRESSION           | -<br>1.9<br>546<br>608<br>23 | 0.0198<br>64398 | H2BC21/H2BC15/H3- 3A/H2AX/H2BC6/H3C4/H3C7/H2AZ1/H2BC4/POLR2K/H2BC9/H2BC7/ZNRD1/H3C1/H2AC7/H2AC20/H4C8/H4C 11/H4C15/H2BC13/H2BC14/H2AC14/H2AC4/H3C15/H4C5/H2AC8/H4C4/H4C1/H4C2/H2AB1/H2BC3/H2BC10/H4 C3/H3C11/H4C13/POLR2F                                                                                                                                                                                                                                                                                                                                                                                                                                                    |
| REACTOME_UNBLOCKING_OF_NMDA_RECEPTOR S_Glutamate_Binding_and_Activation | -<br>1.9<br>557<br>381<br>31 | 0.0198<br>64398 | CAMK2G/GRIA4/GRIN2A/DLG2/GRIA2/NEFL/GRIN2B/LRRC7/CAMK2A/GRIN1                                                                                                                                                                                                                                                                                                                                                                                                                                                                                                                                                                                                                |
| WP_PRADERWILLI_AND_ANGELMAN_SYNDROME                                    | -<br>1.9<br>840<br>728<br>2  | 0.0198<br>64398 | NDN/MAGEL2/CCND1/MKRN3/FEZ1/CGA/NHLH2/SNRPN/GABRD/FSHB/OCA2/GHRH/GABRB3/GABRG1/TYR/ OXT/HTR2C/DLX5/TACR3/GABRG3/PRKCZ/GABRA5/GABRG2/CDK4/KISS1                                                                                                                                                                                                                                                                                                                                                                                                                                                                                                                               |
| KEGG_NEUROACTIVE_LIGAND_RECEPTOR_INTE RACTION                           | -<br>1.9<br>864              | 0.0198<br>64398 | HCRT2R/THRA/F2/GLRB/GABBR1/CGA/P2RX5/NMUR2/S1PR5/GRM3/RXFP2/GRM2/FSHR/ADRA2C/CHRN2B/ GRIN2A/P2RX7/CALCRL/OPRD1/TAAR6/GABRA4/GRIA2/GABRD/GRM5/GABRA2/FSHB/GRM4/CRHR2/PTH2R /GRIN3A/NPY5R/CCKBR/GABBR2/HTR2A/GRIK2/LPAR4/DRD1/GRM7/LPAR3/GABRB3/GABRP/NPY1R/GABR                                                                                                                                                                                                                                                                                                                                                                                                               |

|                                                   |                              |                 |                                                                                                                                                                                                                                                                                                  |
|---------------------------------------------------|------------------------------|-----------------|--------------------------------------------------------------------------------------------------------------------------------------------------------------------------------------------------------------------------------------------------------------------------------------------------|
|                                                   | 746<br>57                    |                 | G1/PTGER3/SSTR5/GLP2R/HTR6/GRIN2B/HTR2C/GRID2/GABRA6/PRSS3/VIPR2/TACR3/GPR50/NTSR1/OPRM1/CHRNA4/SSTR3/CRHR1/GABRG3/SSTR4/RXFP1/CHRNA2/SSTR2/GABRB2/GABRA5/MAS1/GABRG2/TSHR/PRL/PRLHR/MC4R/CHRN3/GABRA3/CHRM2/NPBWR2/GPR83/DRD5/CHRM1/GABRA1/GRIN1/HTR5A/GLP1R/MCHR2/HRH3/HTR1E/HTR1A/SSTR1/GLRA3 |
| REACTOME_SEROTONIN_NEUROTRANSMITTER_RELEASE_CYCLE | -<br>1.9<br>884<br>772<br>97 | 0.0198<br>64398 | TSPOAP1/VAMP2/STX1A/PPFIA3/STXB1/CPLX1/RIMS1/SYN3/SYN1/RAB3A/SYT1/SYN2/SNAP25                                                                                                                                                                                                                    |
| REACTOME_BASE_EXCISION_REPAIR_AP_SITE_FORMATION   | -<br>1.9<br>892<br>646<br>44 | 0.0198<br>64398 | H2BU1/SMUG1/H2BC21/H2BC15/H2AX/H2BC6/TERF2IP/H2AZ1/H2BC4/H2BC9/H2BC7/H2AC7/MPG/NTHL1/H2AC20/H4C8/H4C11/H4C15/H2BC13/H2BC14/H2AC14/H2AC4/H4C5/H2AC8/H4C4/H4C1/H4C2/H2AB1/H2BC3/H2BC10/H4C3/H4C13                                                                                                  |
| REACTOME_CONDENSATION_OF_PROPHASE_CHROMOSOMES     | -<br>1.9<br>916<br>227<br>83 | 0.0198<br>64398 | H4C12/H2BC8/H3C13/H2AC19/PLK1/CCNB1/H4C6/CDK1/H4-16/H2AC6/H3C12/H2BU1/H2BC21/H2BC15/H3-3A/H2AX/H2BC6/H3C4/H3C7/H2AZ1/H2BC4/H2BC9/H2BC7/H3C1/H2AC7/H2AC20/H4C8/H4C11/H4C15/H2BC13/H2BC14/H2AC14/H2AC4/H3C15/H4C5/H2AC8/H4C4/H4C1/H4C2/H2AB1/H2BC3/H2BC10/H4C3/H3C11/H4C13                         |
| REACTOME_GABA_RECEPTOR_ACTIVATION                 | -<br>1.9<br>994<br>715<br>98 | 0.0198<br>64398 | ADCY2/GABRQ/GABBR1/GNG2/GNAI1/GABRA4/GABRA2/KCNJ16/GNAL/GABBR2/GNG4/GNG8/KCNJ12/GABRB3/KCNJ3/ADCY5/GNG13/GABRA6/GABRG3/GNG3/GABRB2/GABRA5/GABRG2/GABRA3/KCNJ9/GABRA1                                                                                                                             |
| REACTOME_RMTS METHYLATE HISTONE ARGININES         | -<br>2.0<br>015<br>943<br>94 | 0.0198<br>64398 | COPRS/H4C12/SMARCE1/H3C13/H2AC19/RPS2/H4C6/H4-16/PRMT3/H2AC6/H3C12/SMARCB1/H2AC16/ACTL6A/SMARCD3/H2AC17/H2AX/H3C4/H3C7/PRMT1/H2AZ1/H3C1/H2AC7/H2AC20/CCND1/H4C8/H4C11/H4C15/H2AC12/H2AC21/H2AC14/H2AC4/H3C15/H4C5/H2AC8/H4C4/H4C1/H4C2/H2AB1/H2AW/H4C3/H3C11/ACTL6B/H4C13/CDK4                   |
| REACTOME_PROTEIN_PROTEIN_INTERACTIONS_AT_SYNAPSES | -<br>2.0<br>243              | 0.0198<br>64398 | APBA1/SLITRK6/APBA2/PTPRD/SLITRK5/PPFIA4/SLITRK2/NRXN2/RTN3/IL1RAPL2/GRIA4/LRRTM3/SYT2/STX1A/SYT7/PPFIA3/NRXN1/DLGAP1/LIN7B/GRIN2A/DLG2/SYT9/GRM5/STXB1/SHANK1/LRFN2/DLGAP2/DLGAP3/IL1RAPL1/SHANK2/LRRTM4/GRIN2B/SLITRK4/LRRTM1/SLITRK1/SYT1/SYT10/GRIN1                                         |

|                                                                                                 |                              |                 |                                                                                                                                                                                                                                                                                                   |
|-------------------------------------------------------------------------------------------------|------------------------------|-----------------|---------------------------------------------------------------------------------------------------------------------------------------------------------------------------------------------------------------------------------------------------------------------------------------------------|
|                                                                                                 | 492<br>51                    |                 |                                                                                                                                                                                                                                                                                                   |
| REACTOME_GABA_SYNTHESIS_RELEASE_REUPTAKE_AND_DEGRADATION                                        | -<br>2.0<br>260<br>765<br>37 | 0.0198<br>64398 | VAMP2/STX1A/GAD1/SLC6A13/STXBP1/GAD2/CPLX1/SLC32A1/RIMS1/RAB3A/SYT1/SNAP25                                                                                                                                                                                                                        |
| REACTOME_RECOGNITION_AND_ASSOCIATION_OF_DNA_GLYCOSYLASE_WITH_SITE_CONTAINING_AN_AFFECTED_PURINE | -<br>2.0<br>328<br>677<br>22 | 0.0198<br>64398 | H2BC21/H2BC15/H2AX/H2BC6/TERF2IP/H2AZ1/H2BC4/H2BC9/H2BC7/H2AC7/MPG/H2AC20/H4C8/H4C11/H4C15/H2BC13/H2BC14/H2AC14/H2AC4/H4C5/H2AC8/H4C4/H4C1/H4C2/H2AB1/H2BC3/H2BC10/H4C3/H4C13                                                                                                                     |
| REACTOME_INHIBITION_OF_DNA_RECOMBINATION_AT_TELOMERE                                            | -<br>2.0<br>396<br>026<br>14 | 0.0198<br>64398 | H2AC19/POLR2C/H4C6/H4-16/POLR2L/POLR2J/H2AC6/H2BU1/H2BC21/H2BC15/H3-3A/H2AX/H2BC6/TERF2IP/H2AZ1/H2BC4/POLR2K/POLR2I/H2BC9/H2BC7/H2AC7/POLR2G/H2AC20/H4C8/H4C11/H4C15/H2BC13/H2BC14/H2AC14/H2AC4/H4C5/H2AC8/H4C4/H4C1/H4C2/H2AB1/H2BC3/H2BC10/H4C3/H4C13/POLR2F                                    |
| REACTOME_DEPOSITION_OF_NEW_CENPA_CONTAINING_NUCLEOSOMES_AT_THE_CENTROMERE                       | -<br>2.0<br>467<br>175<br>85 | 0.0198<br>64398 | CENPL/RUVBL1/RBBP4/CENPA/CENPS/H4C12/H2BC8/CENPK/OIP5/H2AC19/CENPW/CENPU/H4C6/H4-16/CENPM/H2AC6/H2BU1/H2BC21/ITGB3BP/H2BC15/H2AX/H2BC6/CENPH/H2AZ1/H2BC4/CENPQ/H2BC9/H2BC7/H2AC7/CENPX/H2AC20/H4C8/H4C11/H4C15/H2BC13/H2BC14/H2AC14/H2AC4/H4C5/H2AC8/H4C4/H4C1/H4C2/H2AB1/H2BC3/H2BC10/H4C3/H4C13 |
| WP_MITOCHONDRIAL_CIV_ASSEMBLY                                                                   | -<br>2.0<br>471<br>735<br>84 | 0.0198<br>64398 | COX11/TACO1/TMEM177/PNKD/COX18/COA6/COX16/COX6C/SMIM20/COX5A/SURF1/COX17/COX7C/COX6B1/COX8A/COX14/CMC1/COX4I1/PET100/COA3/COX5B/COX7B/HIGD1A/COX6A1/COX7A2/NDUFA4                                                                                                                                 |
| REACTOME_PRC2_METHYLATES_HISTONES_AND_DNA                                                       | -<br>2.0<br>645<br>959<br>6  | 0.0198<br>64398 | H2BC21/H2BC15/H3-3A/H2AX/H2BC6/H3C4/H3C7/H2AZ1/H2BC4/H2BC9/H2BC7/H3C1/H2AC7/H2AC20/H4C8/H4C11/H4C15/H2BC13/H2BC14/H2AC14/H2AC4/H3C15/H4C5/H2AC8/H4C4/H4C1/H4C2/H2AB1/H2BC3/H2BC10/H4C3/H3C11/H4C13                                                                                                |

|                                                                          |                              |                 |                                                                                                                                                                                                                                                                                                                                                                                                                                                                                                                      |
|--------------------------------------------------------------------------|------------------------------|-----------------|----------------------------------------------------------------------------------------------------------------------------------------------------------------------------------------------------------------------------------------------------------------------------------------------------------------------------------------------------------------------------------------------------------------------------------------------------------------------------------------------------------------------|
| REACTOME_DOPAMINE_NEUROTRANSMITTER_RELEASE_CYCLE                         | -<br>2.0<br>701<br>945<br>67 | 0.0198<br>64398 | TSPOAP1/VAMP2/STX1A/PPFIA3/LIN7B/STXBP1/CPLX1/RIMS1/SYN3/SYN1/RAB3A/SYT1/SYN2/SNAP25                                                                                                                                                                                                                                                                                                                                                                                                                                 |
| REACTOME_NEUROTRANSMITTER_RECEPTORS_AND_POSTSYNAPTIC_SIGNAL_TRANSMISSION | -<br>2.0<br>711<br>027<br>57 | 0.0198<br>64398 | TUBAL3/CHRNA3/GRIK4/KCNJ10/PRKCB/TUBB3/TUBA3C/GNG7/GRIP1/KCNJ4/ARHGEF9/CACNG8/KIF17/GRIP2/PRKAR1B/PPM1E/PRKACB/CAMK2G/GRIA4/ADCY2/MAPT/GABRQ/RASGRF2/TSPAN7/GLRB/GABBR1/CAMKK1/GNG2/LIN7B/NCALD/CHRN2/CACNG4/TUBA8/GNAI1/GRIN2A/DLG2/GABRA4/PLCB1/GRIA2/GABRA2/KCNJ16/GRIN3A/GNAL/GABBR2/GRIK2/TUBA1A/GNG4/GNG8/KCNJ12/NEFL/GABRB3/KCNJ3/ADCY5/RASGRF1/GNG13/GRIN2B/GABRA6/LRRC7/NRGN/CHRNA4/GABRG3/GNG3/CHRNA2/CAMK2A/GABRB2/CACNG2/GABRA5/GABRG2/CHRN2B3/GABRA3/PRKCG/KCNJ9/TUBB4A/GABRA1/CACNG3/GRIN1/HTR3B/GLRA3 |
| REACTOME_GLUTAMATE_NEUROTRANSMITTER_RELEASE_CYCLE                        | -<br>2.0<br>789<br>742<br>38 | 0.0198<br>64398 | TSPOAP1/VAMP2/STX1A/PPFIA3/GLS2/STXBP1/CPLX1/RIMS1/SLC1A1/RAB3A/SLC1A6/SYT1/SNAP25/SLC17A7                                                                                                                                                                                                                                                                                                                                                                                                                           |
| KEGG_CARDIAC_MUSCLE_CONTRACTION                                          | -<br>2.0<br>828<br>255<br>49 | 0.0198<br>64398 | MYH7/TNNI3/CACNB4/COX4I2/UQCRB/MYH6/UQCRC1/ATP1A4/COX6C/UQCR10/COX5A/UQCRC2/MYL3/UQCRHL/UQCRFS1/CACNG8/COX7A2L/COX7C/COX6B1/COX8A/CACNG7/ATP1B1/CYC1/COX4I1/UQCRH/ACTC1/UQCRQ/COX5B/TNNC1/UQCR11/COX7B/CACNG4/COX7B2/COX6A1/COX7A2/CACNA2D2/CACNA2D3/FXYD2/COX6A2/CACNG1/CACNG2/ATP1A3/RYR2/CACNG3/TNNT2/MYL2                                                                                                                                                                                                        |
| REACTOME_ERCC6_CSB_AND_EHMT2_G9A_POSITIVELY_REGULATE_RRNA_EXPRESSION     | -<br>2.0<br>840<br>346<br>51 | 0.0198<br>64398 | H2BC21/H2BC15/H3-3A/H2AX/H2BC6/H3C4/H3C7/H2AZ1/H2BC4/H2BC9/H2BC7/H3C1/H2AC7/H2AC20/H4C8/H4C11/H4C15/H2BC13/H2BC14/H2AC14/H2AC4/H3C15/H4C5/H2AC8/H4C4/H4C1/H4C2/H2AB1/H2BC3/H2BC10/H4C3/H3C11/H4C13                                                                                                                                                                                                                                                                                                                   |
| REACTOME_NEUROTRANSMITTER_RELEASE_CYCLE                                  | -<br>2.0<br>846<br>965<br>31 | 0.0198<br>64398 | APBA1/SLC5A7/SLC22A2/PPFIA4/ABAT/SLC18A3/TSPOAP1/VAMP2/STX1A/PPFIA3/GAD1/SLC6A13/GLS2/LIN7B/STXBP1/GAD2/CPLX1/SLC32A1/RIMS1/SLC1A1/SYN3/SYN1/RAB3A/SLC1A6/SYT1/SYN2/SNAP25/SLC17A7                                                                                                                                                                                                                                                                                                                                   |
| WP_MITOCHONDRIAL_COMPLEX_I_ASSEMBLY_MODEL_OXPHOS_SYSTEM                  | -<br>2.0                     | 0.0198<br>64398 | TMEM186/COA1/NDUFAF3/NDUFA5/NDUFAF4/NDUFAF6/TIMMDC1/NDUFB2/NDUFC1/NDUFS5/NDUFB11/NDUFA8/NDUFS3/NDUFA1/ECSIT/NDUFA6/NDUFV2/NDUFB3/NDUFS4/TMEM126B/NDUFA7/NDUFA3/NDUFB10/                                                                                                                                                                                                                                                                                                                                              |

|                                                                                                        |                              |                 |                                                                                                                                                                                                                                                                                                                                                                                                                                                                                                                                                                                                                  |
|--------------------------------------------------------------------------------------------------------|------------------------------|-----------------|------------------------------------------------------------------------------------------------------------------------------------------------------------------------------------------------------------------------------------------------------------------------------------------------------------------------------------------------------------------------------------------------------------------------------------------------------------------------------------------------------------------------------------------------------------------------------------------------------------------|
|                                                                                                        | 998<br>764<br>51             |                 | NDUFA12/NDUFAF2/NDUFB4/NDUFC2/DMAC1/NDUFB6/NDUFB8/NDUFB1/NDUFA13/NDUFAB1/NDUFB5/NDUFA2/NDUFB7/NDUFB9                                                                                                                                                                                                                                                                                                                                                                                                                                                                                                             |
| REACTOME_MITOCHONDRIAL_TRANSLATION                                                                     | -<br>2.1<br>055<br>796<br>65 | 0.0198<br>64398 | MRPS2/MRPL9/MRPS27/MRPL4/MRPS16/MRPS31/MRPL23/MRPS10/MRPL2/GFM2/MRPS9/MRPL17/MTIF3/MRPL30/MRPS18B/TUFM/MRPL18/MRPL39/MRPL16/MRPS18C/MRPL10/MRPL55/MRPL36/MRPL20/MRPS14/MRPS18A/AURKAIP1/MRPL50/MRPL42/MRPL57/MRPL15/MRPL41/MRPL46/MRPL1/MRPL28/MRPS22/MRPL49/MRPS12/MRPL44/MRPL47/MRPL45/MRPS11/MRPS35/MRPS34/MRPL24/MRPL51/MRPL11/MRPS21/MRPS26/MRPS15/MRPL22/MRPS33/MRPL27/MRPL34/CHCHD1/MRPL21/MRPL12/MRPL14/MRPL33/MRPL58/GADD45GIP1/MRPS36/MRPL52/MRPS23/MRPL40/MRPL13/MRPS7/MRPL43/MRPL48/MRPL54/MRPS17/MRPS28/TSF<br>M                                                                                    |
| REACTOME_RNA_POLYMERASE_I_PROMOTER_ESCAPE                                                              | -<br>2.1<br>062<br>227<br>65 | 0.0198<br>64398 | H4C12/H2BC8/H3C13/TAF1D/H2AC19/H4C6/H4-16/POLR2L/H2AC6/H3C12/H2BU1/CCNH/H2BC21/GTF2H5/H2BC15/H3-3A/H2AX/H2BC6/H3C4/H3C7/H2AZ1/H2BC4/POLR2K/H2BC9/H2BC7/ZNRD1/H3C1/H2AC7/H2AC20/H4C8/H4C11/H4C15/H2BC13/H2BC14/H2AC14/H2AC4/H3C15/H4C5/H2AC8/H4C4/H4C1/H4C2/H2AB1/H2BC3/H2BC10/H4C3/H3C11/H4C13/POLR2F                                                                                                                                                                                                                                                                                                            |
| REACTOME_ACTIVATED_PKN1_STIMULATES_TRANSCRIPTION_OF_AR_ANDROGEN_RECEPTOR REGULATED_GENES_KLK2_AND_KLK3 | -<br>2.1<br>084<br>194<br>95 | 0.0198<br>64398 | H4C12/H2BC8/H3C13/H2AC19/H4C6/H4-16/KDM1A/H2AC6/H3C12/H2BU1/H2BC21/H2BC15/H3-3A/H2AX/H2BC6/H3C4/H3C7/H2AZ1/H2BC4/H2BC9/H2BC7/H3C1/H2AC7/H2AC20/H4C8/H4C11/H4C15/H2BC13/H2BC14/H2AC14/H2AC4/H3C15/H4C5/H2AC8/H4C4/H4C1/H4C2/H2AB1/H2BC3/H2BC10/H4C3/H3C11/H4C13                                                                                                                                                                                                                                                                                                                                                   |
| REACTOME_NEUREXINS_AND_NEUROLIGINS                                                                     | -<br>2.1<br>157<br>705<br>49 | 0.0198<br>64398 | LRRTM3/SYT2/STX1A/SYT7/NRXN1/DLGAP1/LIN7B/GRIN2A/DLG2/SYT9/GRM5/STXBP1/SHANK1/DLGAP2/DLGAP3/SHANK2/LRRTM4/GRIN2B/LRRTM1/SYT1/SYT10/GRIN1                                                                                                                                                                                                                                                                                                                                                                                                                                                                         |
| REACTOME_REGULATION_OF_EXPRESSION_OF_SLITS_AND_ROBOS                                                   | -<br>2.1<br>246<br>072<br>24 | 0.0198<br>64398 | MAGOHB/RPS20/RPL22/RPS2/UBA52/RPL37/RPS28/PSMC6/RPLP1/PSMB7/RPL6/PSMA5/RPL23A/RPL12/RPL10/PSMD14/RPS17/RPL23/RPS27/PSMB5/PSMB4/RPLP0/RPS27A/RPL14/PSMB6/PSMD8/RPL30/RPL26/LHX4/RPLP2/RPL13/PSMA6/RPL36A/RPL19/ELOC/PSMA7/SLIT1/RPS24/PSMD13/RPL17/PSMB1/RPL8/RPL10A/RPS23/RPL41/UBB/RPL13A/RPL26L1/RPS15/RPS19/RPS25/RPS13/PSMA2/PSMD10/RPL18/RPL34/RPS6/RPL21/RPS9/RPL5/RPL37A/RPS8/RPL7A/PSMB3/RPL22L1/RPL38/RPL36/RPS29/RPL15/RPL35A/RPL29/RPL31/RPL27A/RPS11/RPS15A/RPS26/RPS3/RPS14/FAU/RPS16/RPS5/RPL32/RPSA/RPS7/RPL39/RBX1/RPS10/RPS21/RPL18A/RPL35/RPS18/RPS4Y1/RPL27/RPL24/RPS4Y2/ELOB/RPL9/LHX3/RPS3A |

|                                           |                              |                 |                                                                                                                                                                                                                                                                                                                                                                                                                                                                                                                                                                                                                                                                                                                                                                                                                                                                                                                                                                                                                                                                                                                                                                                                  |
|-------------------------------------------|------------------------------|-----------------|--------------------------------------------------------------------------------------------------------------------------------------------------------------------------------------------------------------------------------------------------------------------------------------------------------------------------------------------------------------------------------------------------------------------------------------------------------------------------------------------------------------------------------------------------------------------------------------------------------------------------------------------------------------------------------------------------------------------------------------------------------------------------------------------------------------------------------------------------------------------------------------------------------------------------------------------------------------------------------------------------------------------------------------------------------------------------------------------------------------------------------------------------------------------------------------------------|
| REACTOME_DNA_METHYLATION                  | -<br>2.1<br>248<br>346<br>04 | 0.0198<br>64398 | H2BC21/H2BC15/H3-<br>3A/H2AX/H2BC6/H3C4/H3C7/H2AZ1/H2BC4/H2BC9/H2BC7/H3C1/H2AC7/H2AC20/H4C8/H4C11/H4C15/H2BC1<br>3/H2BC14/H2AC14/H2AC4/H3C15/H4C5/H2AC8/H4C4/H4C1/H4C2/H2AB1/H2BC3/H2BC10/H4C3/H3C11/H4C13                                                                                                                                                                                                                                                                                                                                                                                                                                                                                                                                                                                                                                                                                                                                                                                                                                                                                                                                                                                       |
| REACTOME_POTASSIUM_CHANNELS               | -<br>2.1<br>310<br>205<br>43 | 0.0198<br>64398 | KCNK7/KCNN3/KCNJ10/KCNK2/GNG7/KCNH4/KCNG4/KCNC1/KCNJ4/ABCC8/KCNK4/KCNA2/GABBR1/HCN2/<br>KCNN2/KCNQ2/KCNA1/KCNQ5/GNG2/KCNMB4/KCNH3/KCNH7/KCNK9/KCNJ16/KCNAB1/KCNK3/KCNJ11/GA<br>BBR2/KCNS3/GNG4/GNG8/KCNJ12/KCND2/KCNJ3/KCNS1/KCNG3/KCNB1/KCNN1/KCNA4/KCNV1/GNG13/KC<br>NK1/KCNMB2/GNG3/KCNH8/KCNS2/KCNH5/KCNB2/KCNC2/HCN1/KCNA5/KCNJ9                                                                                                                                                                                                                                                                                                                                                                                                                                                                                                                                                                                                                                                                                                                                                                                                                                                            |
| REACTOME_TRANSLATION                      | -<br>2.1<br>381<br>263<br>85 | 0.0198<br>64398 | GFM2/N6AMT1/MRPS9/SARS1/MRPL17/MTIF3/EEF1G/EEF1D/MRPL30/MRPS18B/RPS12/RPL3/SRP14/TUFM/<br>RPS20/EIF3H/MRPL18/MRPL39/MRPL16/RPL22/SEC61B/RPS2/UBA52/MRPS18C/SSR2/MRPL10/EIF3K/MRPL<br>55/RPL37/RPS28/EIF2B3/EIF4E/EIF3E/MRPL36/RPLP1/MRPL20/MRPS14/EIF3I/EEF1A1/MRPS18A/RPL6/AUR<br>KAIP1/RPL23A/RPL12/RPL10/MRPL50/RPS17/MRPL42/MRPL57/SRPRB/SPCS1/RPL23/MRPL15/RPS27/MRPL<br>41/RPLP0/RPS27A/RPL14/EEF1E1/MRPL46/SSR4/MRPL1/MRPL28/MRPS22/EIF4A2/RPL30/RPL26/RPLP2/RP<br>L13/RPL36A/RPL19/MRPL49/RPS24/MRPS12/TRMT112/MRPL44/RPL17/MARS1/MRPL47/MRPL45/RPL8/MRP<br>S11/MRPS35/MRPS34/MRPL24/RPL10A/RPS23/NARS2/RPL41/MRPL51/MRPL11/MRPS21/RPL13A/PPA2/SRP<br>9/RPL26L1/RPS15/RPS19/PPA1/RPS25/MRPS26/RPS13/RPL18/RPL34/RPS6/MRPS15/RPL21/MRPL22/MRPS3<br>3/MRPL27/MRPL34/CHCHD1/SEC61G/RPS9/MRPL21/RPL5/RPL37A/RPS8/RPL7A/MRPL12/RPL22L1/MRPL14/<br>RPL38/EEF1B2/RPL36/MRPL33/MRPL58/GADD45GIP1/RPS29/RPL15/MRPS36/RPL35A/RPL29/RPL31/MRPL5<br>2/RPL27A/RPS11/MRPS23/RPS15A/MRPL40/RPS26/RPS3/MRPL13/RPS14/FAU/MRPS7/RPS16/MRPL43/RPS5<br>/SEC11C/RPL32/RPSA/SEC61A2/RPS7/RPL39/RPS10/RPS21/RPL18A/RPL35/RPS18/RPS4Y1/MRPL48/RPL27/<br>RPL24/RPS4Y2/MRPL54/MRPS17/MRPS28/RPL9/RPS3A/EEF1A2/TFSM |
| REACTOME_VOLTAGE_GATED_POTASSIUM_CHANNELS | -<br>2.1<br>464<br>690<br>01 | 0.0198<br>64398 | KCNH4/KCNG4/KCNC1/KCNA2/KCNQ2/KCNA1/KCNQ5/KCNH3/KCNH7/KCNAB1/KCNS3/KCND2/KCNS1/KCN<br>G3/KCNB1/KCNA4/KCNV1/KCNH8/KCNS2/KCNH5/KCNB2/KCNC2/KCNA5                                                                                                                                                                                                                                                                                                                                                                                                                                                                                                                                                                                                                                                                                                                                                                                                                                                                                                                                                                                                                                                   |
| REACTOME_COMPLEX_I_BIOGENESIS             | -<br>2.1<br>687<br>893<br>9  | 0.0198<br>64398 | NDUF3F3/NDUFA5/NDUF3F4/NDUF3F6/TIMMDC1/NDUFS8/NDUFS7/NDUFB2/NDUFC1/NDUFS5/NDUFB11/N<br>DUFA8/NDUFS3/NDUFA1/ECSIT/NDUFA6/NDUFV2/NDUFB3/NDUFS4/NDUFA9/TMEM126B/NDUFA7/NDUFA3/<br>NDUFB10/NDUFA12/NDUF3F2/NDUFB4/NDUFC2/NDUFB6/NDUF3F5/NDUFB8/NDUFB1/NDUFA13/NDUF3F1/<br>NDUFB5/NDUFA2/NDUFA11/NDUFB7/NDUFB9                                                                                                                                                                                                                                                                                                                                                                                                                                                                                                                                                                                                                                                                                                                                                                                                                                                                                        |

|                                                                       |                              |                 |                                                                                                                                                                                                                                                                                                                                                                                                                                                                                                                                                                                                                                                                                                                               |
|-----------------------------------------------------------------------|------------------------------|-----------------|-------------------------------------------------------------------------------------------------------------------------------------------------------------------------------------------------------------------------------------------------------------------------------------------------------------------------------------------------------------------------------------------------------------------------------------------------------------------------------------------------------------------------------------------------------------------------------------------------------------------------------------------------------------------------------------------------------------------------------|
| REACTOME_SIRT1_NEGATIVELY_REGULATES_RNA_EXPRESSION                    | -<br>2.1<br>750<br>037<br>22 | 0.0198<br>64398 | H4C12/H2BC8/H3C13/TAF1D/H2AC19/H4C6/H4-16/H2AC6/H3C12/H2BU1/H2BC21/H2BC15/H3-3A/H2AX/H2BC6/H3C4/H3C7/H2AZ1/H2BC4/H2BC9/H2BC7/H3C1/H2AC7/H2AC20/H4C8/H4C11/H4C15/H2BC13/H2BC14/H2AC14/H2AC4/H3C15/H4C5/H2AC8/H4C4/H4C1/H4C2/H2AB1/H2BC3/H2BC10/H4C3/H3C11/H4C13                                                                                                                                                                                                                                                                                                                                                                                                                                                                |
| REACTOME_NONSENSE_MEDIATED_DECAY_NMD                                  | -<br>2.1<br>934<br>774<br>58 | 0.0198<br>64398 | MAGOHB/RPS20/RPL22/RPS2/UBA52/PPP2CA/RPL37/RPS28/RPLP1/RPL6/RPL23A/RPL12/RPL10/RPS17/RPL23/RPS27/RPLP0/RPS27A/RPL14/PPP2R2A/RPL30/RPL26/RPLP2/RPL13/RPL36A/RPL19/RPS24/RPL17/RPL8/RPL10A/RPS23/RPL41/RPL13A/RPL26L1/RPS15/RPS19/RPS25/RPS13/RPL18/RPL34/RPS6/RPL21/RPS9/RPL5/RPL37A/RPS8/RPL7A/RPL22L1/RPL38/RPL36/RPS29/RPL15/RPL35A/RPL29/RPL31/RPL27A/RPS11/RPS15A/RPS26/RPS3/RPS14/FAU/RPS16/RPS5/RPL32/RPSA/RPS7/RPL39/RPS10/RPS21/RPL18A/RPL35/RPS18/RPS4Y1/RPL27/RPL24/RPS4Y2/RPL9/RPS3A                                                                                                                                                                                                                               |
| REACTOME_EUKARYOTIC_TRANSLATION_INITIATION                            | -<br>2.1<br>952<br>590<br>2  | 0.0198<br>64398 | RPS20/EIF3H/RPL22/RPS2/UBA52/EIF3K/RPL37/RPS28/EIF2B3/EIF4E/EIF3E/RPLP1/EIF3I/RPL6/RPL23A/RPL12/RPL10/RPS17/RPL23/RPS27/RPLP0/RPS27A/RPL14/EIF4A2/RPL30/RPL26/RPLP2/RPL13/RPL36A/RPL19/RPS24/RPL17/RPL8/RPL10A/RPS23/RPL41/RPL13A/RPL26L1/RPS15/RPS19/RPS25/RPS13/RPL18/RPL34/RPS6/RPL21/RPS9/RPL5/RPL37A/RPS8/RPL7A/RPL22L1/RPL38/RPL36/RPS29/RPL15/RPL35A/RPL29/RPL31/RPL27A/RPS11/RPS15A/RPS26/RPS3/RPS14/FAU/RPS16/RPS5/RPL32/RPSA/RPS7/RPL39/RPS10/RPS21/RPL18A/RPL35/RPS18/RPS4Y1/RPL27/RPL24/RPS4Y2/RPL9/RPS3A                                                                                                                                                                                                         |
| REACTOME_THE_CITRIC_ACID_TCA_CYCLE_AND_RESPIRATORY_ELECTRON_TRANSPORT | -<br>2.2<br>012<br>609<br>01 | 0.0198<br>64398 | DMAC2L/TRAP1/NDUFAF3/GSTZ1/NDUFA5/SDHC/SLC25A14/NDUFAF4/ATP5F1A/SUCLA2/COX11/GLO1/PDHB/CYCS/ME3/ETFA/TACO1/NDUFAF6/SDHD/TIMMDC1/NDUFS8/ATP5PD/ATP5F1B/UQCRB/NDUFS7/COX18/ATP5F1E/SLC16A8/COX16/UQCRC1/ATP5F1D/COX6C/NDUFB2/SDHB/MPC2/NDUFC1/NDUFS5/UQCR10/COX5A/NDUFB11/SURF1/NDUFA8/PM20D1/ADHFE1/NDUFS3/NDUFA1/LDHB/UQCRC2/ECSIT/ATP5PB/NDUFA6/ATP5MC3/ATP5MC2/NDUFV2/NDUFB3/HAGH/NDUFS4/NDUFA9/UQCRFS1/TMEM126B/COX7A2L/COX7C/COX6B1/COX8A/ATP5PF/COX14/NDUFA7/NDUFA3/NDUFB10/NDUFA12/ATP5F1C/NDUFAF2/NDUFB4/ATP5MF/ME1/NDUFC2/CYC1/SUCLG1/COX4I1/UQCRH/MPC1/NDUFB6/NDUFAF5/NDUFB8/NDUFB1/NDUFA13/ATP5PO/UQCRQ/SLC25A27/ATP5MG/NDUFAB1/COX5B/ATP5ME/NDUFB5/NDUFA2/UQCR11/COX7B/ATP5MC1/NDUFA11/NDUFB7/NDUFB9/COX6A1/NDUFA4 |
| WP_OXIDATIVE_PHOSPHORYLATION                                          | -<br>2.2<br>205<br>213<br>7  | 0.0198<br>64398 | NDUFS8/ATP5PD/ATP5F1B/NDUFS7/ATP5F1E/ATP5F1D/NDUFB2/NDUFC1/NDUFS5/NDUFA8/NDUFS3/ATP5PB/NDUFA6/ATP5MC3/ATP5MC2/NDUFV2/NDUFS4/NDUFA9/ATP5PF/NDUFA7/NDUFA3/NDUFB10/NDUFB4/ATP5MF/NDUFC2/NDUFB6/NDUFB8/NDUFB1/ATP5PO/ATP5MG/NDUFAB1/ATP5ME/NDUFB5/NDUFA2/ATP5MC1/NDUFA11/NDUFB7/NDUFB9/NDUFA4                                                                                                                                                                                                                                                                                                                                                                                                                                     |
| REACTOME_SELENOAMINO_ACID_METABOLISM                                  | -<br>2.2                     | 0.0198<br>64398 | RPS20/RPL22/RPS2/UBA52/AHCY/RPL37/RPS28/RPLP1/RPL6/PAPSS1/RPL23A/RPL12/GNMT/RPL10/RPS17/RPL23/RPS27/RPLP0/RPS27A/RPL14/EEF1E1/RPL30/RPL26/RPLP2/RPL13/HNMT/RPL36A/RPL19/RPS24/RPL                                                                                                                                                                                                                                                                                                                                                                                                                                                                                                                                             |

|                                                                      |                              |                 |                                                                                                                                                                                                                                                                                                                                                                                                                                                                                                                                                                                                                                                                                                                                                 |
|----------------------------------------------------------------------|------------------------------|-----------------|-------------------------------------------------------------------------------------------------------------------------------------------------------------------------------------------------------------------------------------------------------------------------------------------------------------------------------------------------------------------------------------------------------------------------------------------------------------------------------------------------------------------------------------------------------------------------------------------------------------------------------------------------------------------------------------------------------------------------------------------------|
|                                                                      | 227<br>296<br>87             |                 | 17/MARS1/RPL8/RPL10A/RPS23/RPL41/RPL13A/RPL26L1/RPS15/RPS19/RPS25/RPS13/RPL18/RPL34/RPS6/RPL21/RPS9/RPL5/RPL37A/RPS8/RPL7A/RPL22L1/RPL38/RPL36/RPS29/RPL15/RPL35A/RPL29/RPL31/RPL27A/RPS11/RPS15A/RPS26/RPS3/RPS14/FAU/RPS16/RPS5/RPL32/RPSA/PSTK/RPS7/RPL39/RPS10/RPS21/RPL18A/RPL35/RPS18/RPS4Y1/RPL27/RPL24/RPS4Y2/RPL9/RPS3A/INMT                                                                                                                                                                                                                                                                                                                                                                                                           |
| REACTOME_RESPONSE_OF_EIF2AK4_GCN2_TO_AMINO_ACID_DEFICIENCY           | -<br>2.2<br>361<br>725<br>06 | 0.0198<br>64398 | RPS20/RPL22/RPS2/UBA52/ATF4/RPL37/RPS28/RPLP1/RPL6/RPL23A/RPL12/RPL10/RPS17/RPL23/RPS27/RPLP0/RPS27A/RPL14/RPL30/RPL26/RPLP2/RPL13/TRIB3/RPL36A/RPL19/RPS24/RPL17/RPL8/RPL10A/RPS23/RPL41/RPL13A/RPL26L1/RPS15/RPS19/RPS25/RPS13/RPL18/RPL34/RPS6/RPL21/RPS9/RPL5/RPL37A/RPS8/RPL7A/RPL22L1/RPL38/RPL36/RPS29/RPL15/RPL35A/RPL29/RPL31/RPL27A/RPS11/RPS15A/RPS26/RPS3/RPS14/FAU/RPS16/RPS5/RPL32/RPSA/RPS7/RPL39/RPS10/RPS21/RPL18A/DDIT3/RPL35/RPS18/RPS4Y1/RPL27/RPL24/RPS4Y2/RPL9/RPS3A                                                                                                                                                                                                                                                      |
| REACTOME_TRANSMISSION_ACROSS_CHEMICAL_SYNAPSES                       | -<br>2.2<br>454<br>926<br>56 | 0.0198<br>64398 | TUBAL3/CHRNA3/PPFIA4/GRIK4/KCNJ10/PRKCB/LRTOMT/TUBB3/SLC6A3/TUBA3C/GNG7/ABAT/GRIP1/KCNJ4/ARHGEF9/SLC18A3/CACNG8/KIF17/CACNA1A/GRIP2/TSPOAP1/PRKAR1B/PPM1E/PRKACB/SLC38A1/CAMK2G/GRIA4/ADCY2/VAMP2/MAPT/GABRQ/RASGRF2/STX1A/PPFIA3/TSPAN7/GLRB/GABBR1/CAMKK1/GAD1/SLC6A13/GLS2/GNG2/LIN7B/NCALD/CHRN2/CACNG4/TUBA8/GNAI1/BCHE/GRIN2A/DLG2/GABRA4/PLCB1/GRIA2/GABRA2/KCNJ16/STXBP1/GRIN3A/CACNA2D2/GNAL/GABBR2/GRIK2/CACNA2D3/TUBA1A/GNG4/GNG8/KCNJ12/NEFL/GABRB3/KCNJ3/GAD2/CPLX1/CACNA1E/SLC32A1/ADCY5/RIMS1/RASGRF1/SLC1A1/GNG13/GRIN2B/GABRA6/LRRC7/NRGN/CHRNA4/GABRG3/SYN3/GNG3/CHRNA2/CAMK2A/GABRB2/CACNG2/SYN1/GABRA5/GABRG2/RAB3A/SLC1A6/SYT1/SYN2/CHRN3/CACNA1B/GABRA3/PRKCG/SNAP25/SLC17A7/KCNJ9/TUBB4A/GABRA1/CACNG3/GRIN1/HTR3B/GLRA3 |
| REACTOME_SRP_DEPENDENT_COTRANSLATIONAL_PROTEIN_TARGETING_TO_MEMBRANE | -<br>2.2<br>838<br>136<br>52 | 0.0198<br>64398 | RPS20/RPL22/SEC61B/RPS2/UBA52/SSR2/RPL37/RPS28/RPLP1/RPL6/RPL23A/RPL12/RPL10/RPS17/SRPRB/SPCS1/RPL23/RPS27/RPLP0/RPS27A/RPL14/SSR4/RPL30/RPL26/RPLP2/RPL13/RPL36A/RPL19/RPS24/RPL17/RPL8/RPL10A/RPS23/RPL41/RPL13A/SRP9/RPL26L1/RPS15/RPS19/RPS25/RPS13/RPL18/RPL34/RPS6/RPL21/SEC61G/RPS9/RPL5/RPL37A/RPS8/RPL7A/RPL22L1/RPL38/RPL36/RPS29/RPL15/RPL35A/RPL29/RPL31/RPL27A/RPS11/RPS15A/RPS26/RPS3/RPS14/FAU/RPS16/RPS5/SEC11C/RPL32/RPSA/SEC61A2/RPS7/RPL39/RPS10/RPS21/RPL18A/RPL35/RPS18/RPS4Y1/RPL27/RPL24/RPS4Y2/RPL9/RPS3A                                                                                                                                                                                                               |
| WP_CYTOPLASMIC_RIBOSOMAL_PROTEINS                                    | -<br>2.3<br>074<br>937<br>74 | 0.0198<br>64398 | RPS20/RPL22/RPS2/UBA52/RPL37/RPS28/RPLP1/RPL6/RPL23A/RPL12/RPL10/RPS17/RPL23/RPS27/RPLP0/RPS27A/RPL14/RPL30/RPL26/RPLP2/RPL13/RPL36A/RPL19/RPS24/RPL17/RPL8/RPL10A/RPS23/RPL41/RPL13A/RPS15/RPS19/RPS25/RPS13/RPL18/RPL34/RPS6/RPL21/RPS9/RPL5/RPL37A/RPS8/RPL7A/RPL38/RPL36/RPS29/RPL15/RPL35A/RPL29/RPL31/RPL27A/RPS11/RPS15A/RPS26/RPS3/RPS14/FAU/RPS16/RPS5/RPL32/RPSA/RPS7/RPL39/RPS10/RPS21/RPL18A/RPL35/RPS18/RPS4Y1/RPL27/RPL24/RPL9/RPS3A                                                                                                                                                                                                                                                                                              |
| WP_GABA_RECEPTOR_SIGNALING                                           | -<br>2.3<br>089              | 0.0198<br>64398 | GABRQ/GABBR1/GAD1/GABRA4/GABRD/GABRA2/GABBR2/GABRB3/GABRP/GAD2/GABRG1/SLC32A1/GABRA6/GABRG3/GABRB2/GABRA5/GABRG2/GABRA3/GABRA1                                                                                                                                                                                                                                                                                                                                                                                                                                                                                                                                                                                                                  |



|                                            |                              |                 |                                                                                                                                                                                                                                                                                                                                                                                                                                                                                                                                                                                                                                                                                                                                                                                                                                                                                                                                                                                                                                                                                                                                                                    |
|--------------------------------------------|------------------------------|-----------------|--------------------------------------------------------------------------------------------------------------------------------------------------------------------------------------------------------------------------------------------------------------------------------------------------------------------------------------------------------------------------------------------------------------------------------------------------------------------------------------------------------------------------------------------------------------------------------------------------------------------------------------------------------------------------------------------------------------------------------------------------------------------------------------------------------------------------------------------------------------------------------------------------------------------------------------------------------------------------------------------------------------------------------------------------------------------------------------------------------------------------------------------------------------------|
|                                            | 111<br>71                    |                 |                                                                                                                                                                                                                                                                                                                                                                                                                                                                                                                                                                                                                                                                                                                                                                                                                                                                                                                                                                                                                                                                                                                                                                    |
| REACTOME_NEURONAL_SYSTEM                   | -<br>2.3<br>495<br>643<br>53 | 0.0198<br>64398 | PTPRD/TUBA4A/KCNK7/SLITRK5/TUBAL3/CHRNA3/KCNN3/PPFIA4/GRIK4/KCNJ10/PRKCB/LRTOMT/TUBB3/SLC6A3/SLITRK2/KCNK2/TUBA3C/GNG7/KCNH4/ABAT/NRXN2/KCNG4/GRIP1/RTN3/KCNC1/KCNJ4/ARHGEF9/IL1RAPL2/SLC18A3/CACNG8/KIF17/CACNA1A/GRIP2/ABCC8/TSPOAP1/PRKAR1B/PPM1E/PRKACB/SLC38A1/CAMK2G/KCNK4/GRIA4/LRRTM3/ADCY2/SYT2/VAMP2/KCNA2/MAPT/GABRQ/RASGRF2/STX1A/SYT7/PPFIA3/TSPAN7/NRXN1/GLRB/GABBR1/HCN2/CAMKK1/GAD1/KCNN2/KCNQ2/SLC6A13/KCNA1/GLS2/DLGAP1/KCNQ5/GNG2/LIN7B/NCALD/CHRN2/CACNG4/TUBA8/GNAI1/BCHE/GRIN2A/KCNMB4/KCNH3/DLG2/KCNH7/GABRA4/PLCB1/GRIA2/KCNK9/SYT9/GRM5/GABRA2/KCNJ16/STXBP1/KCNAB1/GRIN3A/CACNA2D2/GNAL/KCNK3/KCNJ11/GABBR2/KCNS3/GRIK2/CACNA2D3/SHANK1/TUBA1A/GNG4/GNG8/KCNJ12/KCND2/NEFL/GABRB3/KCNJ3/KCNS1/GAD2/CPLX1/LRFN2/CACNA1E/DLGAP2/KCNG3/KCNB1/SLC32A1/KCNN1/DLGAP3/ADCY5/RIMS1/RASGRF1/KCNA4/IL1RAPL1/SHANK2/LRRTM4/KCNV1/SLC1A1/GNG13/GRIN2B/GABRA6/KCNK1/SLITRK4/LRRC7/KCNMB2/LRRTM1/NRGN/CHRNA4/GABRG3/SYN3/GNG3/CHRNA2/CAMK2A/GABRB2/SLITRK1/CACNG2/SYN1/GJD2/KCNH8/GABRA5/GABRG2/RAB3A/SLC1A6/SYT1/KCNS2/KCNH5/SYN2/CHRN3/CACNA1B/GABRA3/KCNB2/KCNC2/PRKCG/SNAP25/HCN1/KCNA5/SLC17A7/KCNJ9/SYT10/TUBB4A/GABRA1/CACNG3/GRIN1/HTR3B/GLRA3 |
| WP_SYNAPTIC_VESICLE_PATHWAY                | -<br>2.3<br>528<br>697<br>74 | 0.0198<br>64398 | SLC18A3/CACNA1A/SLC38A1/VAMP2/UNC13A/STX1A/SLC25A4/SLC18A1/STXBP1/DNM3/CPLX1/STX1B/SLC32A1/RIMS1/SYP/SYN3/SYN1/RAB3A/SYT1/CPLX2/SLC17A6/SYN2/CACNA1B/SLC17A8/SNAP25/UNC13C/SLC17A7                                                                                                                                                                                                                                                                                                                                                                                                                                                                                                                                                                                                                                                                                                                                                                                                                                                                                                                                                                                 |
| REACTOME_EUKARYOTIC_TRANSLATION_ELONGATION | -<br>2.3<br>568<br>544<br>76 | 0.0198<br>64398 | EEF1G/EEF1D/RPS12/RPL3/RPS20/RPL22/RPS2/UBA52/RPL37/RPS28/RPLP1/EEF1A1/RPL6/RPL23A/RPL12/RPL10/RPS17/RPL23/RPS27/RPLP0/RPS27A/RPL14/RPL30/RPL26/RPLP2/RPL13/RPL36A/RPL19/RPS24/RPL17/RPL8/RPL10A/RPS23/RPL41/RPL13A/RPL26L1/RPS15/RPS19/RPS25/RPS13/RPL18/RPL34/RPS6/RPL21/RPS9/RPL5/RPL37A/RPS8/RPL7A/RPL22L1/RPL38/EEF1B2/RPL36/RPS29/RPL15/RPL35A/RPL29/RPL31/RPL27A/RPS11/RPS15A/RPS26/RPS3/RPS14/FAU/RPS16/RPS5/RPL32/RPSA/RPS7/RPL39/RPS10/RPS21/RPL18A/RPL35/RPS18/RPS4Y1/RPL27/RPL24/RPS4Y2/RPL9/RPS3A/EEF1A2                                                                                                                                                                                                                                                                                                                                                                                                                                                                                                                                                                                                                                              |
| KEGG_PARKINSONS_DISEASE                    | -<br>2.3<br>638<br>043<br>2  | 0.0198<br>64398 | NDUFS8/ATP5PD/ATP5F1B/COX4I2/SLC25A5/UQCRB/NDUFS7/ATP5F1E/SEPTIN5/UQCRC1/ATP5F1D/COX6C/NDUFB2/SDHB/VDAC3/UBB/NDUFC1/PARK7/SLC6A3/NDUFS5/UQCR10/COX5A/NDUFA8/NDUFS3/NDUFA1/UQCRC2/ATP5PB/NDUFA6/ATP5MC3/ATP5MC2/NDUFV2/UQCRHL/LRRK2/NDUFB3/NDUFS4/NDUFA9/UQCRFS1/COX7A2L/COX7C/COX6B1/COX8A/ATP5PF/NDUFA7/NDUFA3/NDUFB10/ATP5F1C/NDUFB4/NDUFC2/CYC1/COX4I1/UQCRH/NDUFB6/NDUFB8/NDUFB1/ATP5PO/UQCRQ/NDUFAB1/COX5B/SLC25A4/SLC18A1/NDUF                                                                                                                                                                                                                                                                                                                                                                                                                                                                                                                                                                                                                                                                                                                               |

|                                                                                                                            |                              |                 |                                                                                                                                                                                                                                                                                                                                                                                                                                                                                                                                                                         |
|----------------------------------------------------------------------------------------------------------------------------|------------------------------|-----------------|-------------------------------------------------------------------------------------------------------------------------------------------------------------------------------------------------------------------------------------------------------------------------------------------------------------------------------------------------------------------------------------------------------------------------------------------------------------------------------------------------------------------------------------------------------------------------|
|                                                                                                                            |                              |                 | B5/NDUFA2/UQCR11/COX7B/ATP5MC1/NDUFB7/NDUFB9/COX7B2/COX6A1/TH/COX7A2/UCHL1/NDUFA4/COX6A2/SNCA                                                                                                                                                                                                                                                                                                                                                                                                                                                                           |
| KEGG_OXIDATIVE_PHOSPHORYLATION                                                                                             | -<br>2.3<br>888<br>362<br>9  | 0.0198<br>64398 | SDHD/ATP6V1E2/NDUFS8/ATP5PD/ATP5F1B/COX4I2/UQCRB/NDUFS7/ATP5F1E/UQCRC1/ATP6V1E1/ATP5F1D/COX6C/NDUFB2/SDHB/NDUFC1/PPA2/NDUFS5/UQCR10/COX5A/NDUFA8/PPA1/NDUFS3/NDUFA1/UQCRC2/ATP5PB/NDUFA6/ATP5MC3/ATP5MC2/COX17/NDUFV2/UQCRHL/NDUFB3/NDUFS4/NDUFA9/UQCRFS1/COX7A2L/COX7C/COX6B1/COX8A/ATP5PF/NDUFA7/ATP6V0B/NDUFA3/NDUFB10/ATP5F1C/ATP6V1F/NDUFB4/ATP5MF/NDUFC2/CYC1/COX4I1/UQCRH/NDUFB6/NDUFB8/NDUFB1/ATP5PO/UQCRQ/ATP5MG/NDUFAB1/COX5B/ATP5ME/NDUFB5/NDUFA2/UQCR11/COX7B/ATP5MC1/NDUFA11/NDUFB7/NDUFB9/COX7B2/COX6A1/LHPP/COX7A2/ATP4A/NDUFA4/COX6A2/ATP6V1G2/ATP6V0A4 |
| KEGG_RIBOSOME                                                                                                              | -<br>2.3<br>888<br>667<br>19 | 0.0198<br>64398 | RPS20/RPL22/RPS2/UBA52/RPL37/RPS28/RPLP1/RPL6/RPL23A/RPL12/RPL10/RPS17/RPL23/RPS27/RPLP0/RPS27A/RPL14/RPL30/RPL26/RPLP2/RPL13/RPL36A/RPL19/RPS24/RPL17/RPL8/RPL10A/RPS23/RPL41/RPL13A/RSL24D1P11/RPL26L1/RPS15/RPS19/RPS25/RPS13/RPL18/RPL34/RPS6/RPL21/RPS9/RPL5/RPL37A/RPS8/RPL7A/RPL22L1/RPL38/RPL36/RPS29/RPL15/RPL35A/RPL29/RPL31/RPL27A/RPS11/RPS15A/RPS26/RPS3/RSL24D1/MRPL13/FAU/RPS16/RPS5/RPL32/RPSA/RPS7/RPL39/RPS10/RPS21/RPL18A/RPL35/RPS18/RPS4Y1/RPL27/RPL24/RPL9/RPS3A                                                                                  |
| REACTOME_RESPIRATORY_ELECTRON_TRANSPORT                                                                                    | -<br>2.4<br>343<br>976<br>73 | 0.0198<br>64398 | TRAP1/NDUFAF3/NDUFA5/SDHC/NDUFAF4/COX11/CYCS/ETFA/TACO1/NDUFAF6/SDHD/TIMMDC1/NDUFS8/UQCRB/NDUFS7/COX18/COX16/UQCRC1/COX6C/NDUFB2/SDHB/NDUFC1/NDUFS5/UQCR10/COX5A/NDUFB11/SURF1/NDUFA8/NDUFS3/NDUFA1/UQCRC2/ECSIT/NDUFA6/NDUFV2/NDUFB3/NDUFS4/NDUFA9/UQCRFS1/TMEM126B/COX7A2L/COX7C/COX6B1/COX8A/COX14/NDUFA7/NDUFA3/NDUFB10/NDUFA12/NDUFAF2/NDUFB4/NDUFC2/CYC1/COX4I1/UQCRH/NDUFB6/NDUFAF5/NDUFB8/NDUFB1/NDUFA13/UQCRQ/NDUFAB1/COX5B/NDUFB5/NDUFA2/UQCR11/COX7B/NDUFA11/NDUFB7/NDUFB9/COX6A1/NDUFA4                                                                     |
| WP_ELECTRON_TRANSPORT_CHAIN_OXPHOS_SYSTEM_IN_MITOCHONDRIA                                                                  | -<br>2.4<br>717<br>717<br>44 | 0.0198<br>64398 | SDHD/NDUFS8/ATP5PD/ATP5F1B/SLC25A5/UQCRB/NDUFS7/ATP5F1E/UQCRC1/ATP5F1D/COX6C/ATP5F1F/NDUFB2/SDHB/NDUFC1/NDUFS5/UQCR10/COX5A/SURF1/NDUFA8/NDUFS3/NDUFA1/UQCRC2/ATP5PB/NDUFA6/ATP5MC3/ATP5MC2/COX17/NDUFV2/NDUFB3/NDUFS4/NDUFA9/UQCRFS1/COX7A2L/COX7C/COX6B1/COX8A/ATP5PF/NDUFA7/NDUFA3/NDUFB10/NDUFA12/ATP5F1C/NDUFB4/ATP5MF/NDUFC2/COX4I1/UQCRH/NDUFB6/NDUFB8/NDUFB1/ATP5PO/UQCRQ/SLC25A27/ATP5MG/NDUFAB1/COX5B/ATP5ME/SLC25A4/NDUFB5/NDUFA2/UQCR11/COX7B/ATP5MC1/NDUFB7/NDUFB9/COX6A1/COX7A2/NDUFA4/COX6A2                                                             |
| REACTOME_RESPIRATORY_ELECTRON_TRANSPORT_ATP_SYNTHESIS_BY_CHEMIOSMOTIC_COUPLING_AND_HEAT_PRODUCTION_BY_UNCOUPLING_PROTEINS_ | -<br>2.4<br>821<br>834<br>22 | 0.0198<br>64398 | DMAC2L/TRAP1/NDUFAF3/NDUFA5/SDHC/SLC25A14/NDUFAF4/ATP5F1A/COX11/CYCS/ETFA/TACO1/NDUFAF6/SDHD/TIMMDC1/NDUFS8/ATP5PD/ATP5F1B/UQCRB/NDUFS7/COX18/ATP5F1E/COX16/UQCRC1/ATP5F1D/COX6C/NDUFB2/SDHB/NDUFC1/NDUFS5/UQCR10/COX5A/NDUFB11/SURF1/NDUFA8/PM20D1/NDUFS3/NDUFA1/UQCRC2/ECSIT/ATP5PB/NDUFA6/ATP5MC3/ATP5MC2/NDUFV2/NDUFB3/NDUFS4/NDUFA9/UQCRFS1/TMEM126B/COX7A2L/COX7C/COX6B1/COX8A/ATP5PF/COX14/NDUFA7/NDUFA3/NDUFB10/NDUFA12/ATP5F1C/NDUFAF2/NDUFB4/ATP5MF/NDUFC2/CYC1/COX4I1/UQCRH/NDUFB6/NDUFAF5/NDUFB8/NDUFB1/ND                                                  |

|  |  |  |                                                                                                                                    |
|--|--|--|------------------------------------------------------------------------------------------------------------------------------------|
|  |  |  | UFA13/ATP5PO/UQCRQ/SLC25A27/ATP5MG/NDUFAB1/COX5B/ATP5ME/NDUFB5/NDUFA2/UQCR11/COX7B/<br>ATP5MC1/NDUFA11/NDUFB7/NDUFB9/COX6A1/NDUFA4 |
|--|--|--|------------------------------------------------------------------------------------------------------------------------------------|

Table S3. The information of top 10 hub genes

| Rank | Gene           | Degree value | Expression level | Enriched significant clusters |
|------|----------------|--------------|------------------|-------------------------------|
| 1    | <i>IL6</i>     | 33           | Up               | Cluster 3                     |
| 2    | <i>GRIN1</i>   | 32           | Down             | Cluster 1                     |
| 3    | <i>SNCB</i>    | 31           | Down             | Cluster 1                     |
| 4    | <i>CCK</i>     | 29           | Down             | Cluster 1                     |
| 4    | <i>OPALIN</i>  | 29           | Down             | Cluster 1                     |
| 4    | <i>HTR5A</i>   | 29           | Down             | Cluster 1                     |
| 7    | <i>KCNJ9</i>   | 28           | Down             | Cluster 1                     |
| 8    | <i>GABRA1</i>  | 26           | Down             | Cluster 1                     |
| 9    | <i>ATP2B3</i>  | 25           | Down             | Cluster 1                     |
| 9    | <i>SLC17A7</i> | 25           | Down             | Cluster 1                     |

Table S4. Correlation analysis between NOD1 and immune cells in GBM

| Immune cell         | Pearson coefficient | <i>p</i> value (Pearson) | Spearman coefficient | <i>p</i> value (Spearman) |
|---------------------|---------------------|--------------------------|----------------------|---------------------------|
| NK cells            | 0.441               | <0.001                   | 0.462                | <0.001                    |
| Neutrophils         | 0.381               | <0.001                   | 0.455                | <0.001                    |
| Tem                 | 0.438               | <0.001                   | 0.436                | <0.001                    |
| TReg                | 0.407               | <0.001                   | 0.419                | <0.001                    |
| Eosinophils         | 0.337               | <0.001                   | 0.364                | <0.001                    |
| Macrophages         | 0.336               | <0.001                   | 0.361                | <0.001                    |
| Th17 cells          | 0.307               | <0.001                   | 0.336                | <0.001                    |
| NK CD56dim cells    | 0.286               | <0.001                   | 0.313                | <0.001                    |
| T helper cells      | 0.252               | <0.001                   | 0.287                | <0.001                    |
| aDC                 | 0.274               | <0.001                   | 0.275                | <0.001                    |
| DC                  | 0.306               | <0.001                   | 0.266                | <0.001                    |
| Th1 cells           | 0.237               | 0.002                    | 0.260                | <0.001                    |
| iDC                 | 0.235               | 0.002                    | 0.246                | 0.001                     |
| Tcm                 | 0.186               | 0.015                    | 0.216                | 0.005                     |
| CD8 T cells         | 0.230               | 0.003                    | 0.198                | 0.010                     |
| T cells             | 0.210               | 0.006                    | 0.188                | 0.015                     |
| Cytotoxic cells     | 0.186               | 0.016                    | 0.174                | 0.024                     |
| NK CD56bright cells | 0.163               | 0.034                    | 0.126                | 0.102                     |
| Th2 cells           | 0.118               | 0.127                    | 0.113                | 0.143                     |
| Mast cells          | 0.054               | 0.485                    | 0.068                | 0.380                     |
| B cells             | 0.062               | 0.422                    | 0.065                | 0.403                     |
| TFH                 | 0.066               | 0.392                    | 0.043                | 0.578                     |
| pDC                 | 0.027               | 0.725                    | 0.032                | 0.682                     |
| Tgd                 | -0.152              | 0.049                    | 0.017                | 0.827                     |

NK cell, natural killer cell; DC, dendritic cell; pDC, plasmacytoid DC; aDC, activated DC; iDC, interdigitating DC; Tcm, central memory T cell; Tem, effector memory T cell; TFH, follicular helper T cell; Tgd, gammadelta T cell; TReg, regulatory T cell.

Table S5. Tissue microarray data

| No. | intensity | percentage | expression<br>(low=0,<br>high=1) | survival<br>(death=1,<br>survival=0) | overall<br>survival | relapse<br>(no=0, yes=1) | disease free<br>survival | sex<br>(female=0,<br>male=1) | age | WHO<br>classification | malignancy<br>(no=0, yes=1) |
|-----|-----------|------------|----------------------------------|--------------------------------------|---------------------|--------------------------|--------------------------|------------------------------|-----|-----------------------|-----------------------------|
| F01 | 1.5-2     | 90.00%     | 1                                | 0                                    | 91                  | 0                        | 91                       | 0                            | 17  | 2                     | 0                           |
| A11 | 1.5-2     | 95.00%     | 1                                | 0                                    | 109                 | 0                        | 109                      | 0                            | 47  | 2                     | 0                           |
| I09 | 1.5       | 90.00%     | 1                                | 0                                    | 75                  | 0                        | 75                       | 0                            | 24  | 2                     | 0                           |
| G10 | 1.5       | 90.00%     | 1                                | 0                                    | 85                  | 0                        | 85                       | 0                            | -   | 2                     | 0                           |
| J09 | 2         | 90.00%     | 1                                | 0                                    | 71                  | 0                        | 71                       | 0                            | 66  | 1                     | 0                           |
| D16 | 1.5       | 80.00%     | 1                                | 0                                    | 95                  | 0                        | 95                       | 1                            | 49  | 3                     | 0                           |
| C07 | 1.5       | 80.00%     | 1                                | 0                                    | 100                 | 0                        | 100                      | 1                            | 34  | 2                     | 0                           |
| J08 | 1.5-2     | 80.00%     | 1                                | 0                                    | 71                  | 0                        | 71                       | 1                            | 49  | 2                     | 0                           |
| E14 | 1.5       | 90.00%     | 1                                | 1                                    | 15                  | 1                        | 12                       | 0                            | 43  | 4                     | 1                           |
| J01 | 1.5       | 80.00%     | 1                                | 1                                    | 29                  | 1                        | 29                       | 0                            | 70  | 3                     | 0                           |
| F16 | 1.5-2     | 90.00%     | 1                                | 0                                    | 87                  | 1                        | 48                       | 0                            | 52  | 2                     | 0                           |
| F14 | 1.5-2     | 95.00%     | 1                                | 0                                    | 87                  | 1                        | 53                       | 0                            | 42  | 2                     | 0                           |
| H16 | 1.5       | 80.00%     | 1                                | 0                                    | 77                  | 1                        | 26                       | 0                            | 48  | 2                     | 0                           |
| J04 | 1.5-2     | 80.00%     | 1                                | 1                                    | 10                  | 1                        | 10                       | 1                            | 45  | 4                     | 1                           |
| I12 | 1.5-2     | 90.00%     | 1                                | 1                                    | 10                  | 1                        | 10                       | 1                            | 62  | 4                     | 1                           |
| J10 | 1.5-2     | 90.00%     | 1                                | 1                                    | 14                  | 1                        | 14                       | 1                            | 41  | 4                     | 1                           |
| E02 | 1.5-2     | 90.00%     | 1                                | 1                                    | 13                  | 1                        | 13                       | 1                            | 44  | 4                     | 1                           |
| G16 | 2         | 90.00%     | 1                                | 1                                    | 32                  | 1                        | 32                       | 1                            | 56  | 4                     | 1                           |
| H07 | 1.5       | 90.00%     | 1                                | 1                                    | 41                  | 1                        | 34                       | 1                            | 46  | 4                     | 1                           |
| I10 | 1.5-2     | 90.00%     | 1                                | 1                                    | 23                  | 1                        | 23                       | 1                            | 52  | 3                     | 0                           |
| G15 | 1.5-2     | 80.00%     | 1                                | 1                                    | 11                  | 1                        | 11                       | 1                            | 59  | 3                     | 0                           |
| E16 | 1.5       | 90.00%     | 1                                | 1                                    | 37                  | 1                        | 27                       | 1                            | 46  | 3                     | 0                           |
| H06 | 1.5       | 85.00%     | 1                                | 0                                    | 81                  | 1                        | 40                       | 1                            | 34  | 3                     | 0                           |
| G02 | 1.5-2     | 80.00%     | 1                                | 1                                    | 62                  | 1                        | 44                       | 1                            | 68  | 2                     | 0                           |
| F06 | 1.5       | 90.00%     | 1                                | 1                                    | 20                  | 1                        | 20                       | 1                            | 74  | 2                     | 0                           |
| I03 | 1.5-2     | 80.00%     | 1                                | 0                                    | 76                  | 1                        | 76                       | 1                            | 41  | 2                     | 0                           |
| D09 | 1.5       | 80.00%     | 1                                | 0                                    | 97                  | 1                        | 30                       | 1                            | 60  | 2                     | 0                           |
| D07 | 1.5-2     | 80.00%     | 1                                | 0                                    | 97                  | 1                        | 35                       | 1                            | 47  | 2                     | 0                           |

|     |       |        |   |   |     |   |     |   |    |   |   |
|-----|-------|--------|---|---|-----|---|-----|---|----|---|---|
| G06 | 1.5   | 60.00% | 1 | 0 | 86  | 0 | 86  | 0 | 14 | 1 | 0 |
| I16 | 1.5   | 60.00% | 1 | 0 | 72  | 0 | 72  | 1 | 30 | 1 | 0 |
| G09 | 1.5   | 60.00% | 1 | 1 | 17  | 1 | 17  | 0 | 60 | 4 | 1 |
| F15 | 1.5   | 60.00% | 1 | 1 | 55  | 1 | 35  | 0 | 45 | 3 | 0 |
| H03 | 1.5   | 60.00% | 1 | 1 | 59  | 1 | 22  | 1 | 35 | 3 | 0 |
| J11 | 1.5   | 60.00% | 1 | 1 | 21  | 1 | 21  | 1 | 56 | 3 | 0 |
| E09 | 1-1.5 | 90.00% | 1 | 0 | 93  | 0 | 93  | 0 | 42 | 3 | 0 |
| A13 | 1-1.5 | 90.00% | 1 | 0 | 108 | 0 | 108 | 0 | 59 | 2 | 0 |
| B03 | 1     | 80.00% | 1 | 0 | 106 | 0 | 106 | 0 | 55 | 2 | 0 |
| J07 | 1-1.5 | 80.00% | 1 | 0 | 71  | 0 | 71  | 0 | 19 | 2 | 0 |
| A08 | 1-1.5 | 90.00% | 1 | 0 | 110 | 0 | 110 | 1 | 41 | 2 | 0 |
| I13 | 1     | 80.00% | 1 | 0 | 74  | 0 | 74  | 1 | 56 | 2 | 0 |
| J13 | 1     | 80.00% | 1 | 0 | 69  | 0 | 69  | 1 | 10 | 1 | 0 |
| G05 | 1     | 80.00% | 1 | 1 | 23  | 1 | 23  | 0 | 65 | 4 | 1 |
| H10 | 1-1.5 | 80.00% | 1 | 1 | 23  | 1 | 23  | 0 | 30 | 3 | 0 |
| D04 | 1     | 80.00% | 1 | 1 | 50  | 1 | 50  | 0 | 57 | 3 | 0 |
| I11 | 1-1.5 | 80.00% | 1 | 0 | 75  | 1 | 75  | 0 | 26 | 3 | 0 |
| B07 | 1     | 90.00% | 1 | 0 | 105 | 1 | 59  | 0 | 49 | 2 | 0 |
| J03 | 1     | 90.00% | 1 | 1 | 9   | 1 | 9   | 1 | 63 | 4 | 1 |
| H11 | 1     | 80.00% | 1 | 1 | 34  | 1 | 23  | 1 | 65 | 4 | 1 |
| E01 | 1     | 80.00% | 1 | 1 | 50  | 1 | 41  | 1 | 41 | 4 | 1 |
| E04 | 1     | 80.00% | 1 | 1 | 11  | 1 | 11  | 1 | 22 | 4 | 1 |
| A05 | 1-1.5 | 80.00% | 1 | 1 | 22  | 1 | 22  | 1 | 53 | 4 | 1 |
| G03 | 1-1.5 | 80.00% | 1 | 1 | 10  | 1 | 10  | 1 | 60 | 4 | 1 |
| C16 | 1-1.5 | 80.00% | 1 | 0 | 99  | 1 | 48  | 1 | 68 | 3 | 0 |
| I01 | 1-1.5 | 80.00% | 1 | 0 | 77  | 1 | 41  | 1 | 36 | 2 | 0 |
| I04 | 1.5   | 30.00% | 0 | 0 | 76  | 0 | 76  | 0 | 45 | 2 | 0 |
| G11 | 1     | 60.00% | 0 | 0 | 85  | 0 | 85  | 1 | 36 | 2 | 0 |
| J06 | 1.5   | 40.00% | 0 | 1 | 11  | 1 | 11  | 0 | 69 | 3 | 0 |
| A14 | 1     | 60.00% | 0 | 1 | 72  | 1 | 17  | 0 | 56 | 3 | 0 |
| I08 | 1.5   | 30.00% | 0 | 1 | 18  | 1 | 18  | 1 | 30 | 3 | 0 |
| C08 | 1     | 60.00% | 0 | 0 | 100 | 1 | 46  | 1 | 37 | 3 | 0 |

|     |       |        |   |   |     |   |     |   |    |   |   |
|-----|-------|--------|---|---|-----|---|-----|---|----|---|---|
| H05 | 1-1.5 | 60.00% | 0 | 0 | 81  | 1 | 33  | 1 | 47 | 3 | 0 |
| D03 | 1     | 60.00% | 0 | 0 | 98  | 1 | 34  | 1 | 65 | 2 | 0 |
| D05 | 1-1.5 | 60.00% | 0 | 0 | 97  | 1 | 55  | 1 | 57 | 2 | 0 |
| H09 | 1-1.5 | 40.00% | 0 | 0 | 79  | 0 | 79  | 0 | 59 | 3 | 0 |
| I06 | 1-1.5 | 40.00% | 0 | 0 | 76  | 0 | 76  | 0 | 32 | 2 | 0 |
| A12 | 0.5   | 80.00% | 0 | 0 | 108 | 0 | 108 | 0 | 34 | 1 | 0 |
| A10 | 0.5-1 | 80.00% | 0 | 0 | 109 | 0 | 109 | 1 | 17 | 3 | 0 |
| F13 | 1     | 30.00% | 0 | 0 | 87  | 0 | 87  | 1 | 3  | 2 | 0 |
| B08 | 0.5   | 90.00% | 0 | 0 | 105 | 0 | 105 | 1 | 61 | 2 | 0 |
| D13 | 1     | 40.00% | 0 | 0 | 96  | 1 | 54  | 0 | 42 | 2 | 0 |
| H13 | 1     | 30.00% | 0 | 1 | 12  | 1 | 12  | 1 | 41 | 4 | 1 |
| H15 | 1     | 30.00% | 0 | 1 | 6   | 1 | 6   | 1 | 78 | 4 | 1 |
| G12 | 1.5   | 10.00% | 0 | 0 | 85  | 0 | 85  | 0 | 49 | 1 | 0 |
| G08 | 1.5   | 10.00% | 0 | 0 | 86  | 0 | 86  | 1 | 37 | 2 | 0 |
| G14 | 1.5   | 20.00% | 0 | 0 | 84  | 0 | 84  | 1 | 19 | 2 | 0 |
| A06 | 1.5   | 10.00% | 0 | 0 | 111 | 0 | 111 | 1 | 69 | 2 | 0 |
| H01 | 1.5   | 10.00% | 0 | 1 | 40  | 1 | 40  | 1 | 58 | 3 | 0 |
| J15 | 1.5   | 25.00% | 0 | 1 | 39  | 1 | 39  | 1 | 40 | 3 | 0 |
| I15 | 1.5   | 20.00% | 0 | 1 | 19  | 1 | 19  | 1 | 67 | 3 | 0 |
| F10 | 1.5   | 20.00% | 0 | 0 | 88  | 1 | 30  | 1 | 36 | 3 | 0 |
| B11 | 0.5   | 60.00% | 0 | 0 | 104 | 1 | 85  | 1 | 39 | 3 | 0 |
| E05 | 0.5   | 60.00% | 0 | 0 | 94  | 1 | 27  | 1 | 20 | 3 | 0 |
| E10 | 0.5-1 | 60.00% | 0 | 1 | 55  | 1 | 47  | 1 | 41 | 2 | 0 |
| A15 | 0.5   | 60.00% | 0 | 0 | 108 | 1 | 34  | 1 | 80 | 2 | 0 |
| B09 | 0.5   | 60.00% | 0 | 0 | 105 | 1 | 52  | 1 | 44 | 2 | 0 |
| A01 | 1     | 5.00%  | 0 | 0 | 113 | 0 | 113 | 0 | 37 | 2 | 0 |
| F08 | 0.5   | 30.00% | 0 | 0 | 88  | 0 | 88  | 0 | 36 | 2 | 0 |
| E03 | 1     | 5.00%  | 0 | 0 | 94  | 0 | 94  | 0 | 36 | 2 | 0 |
| D06 | 1     | 5.00%  | 0 | 0 | 97  | 0 | 97  | 0 | 6  | 1 | 0 |
| C06 | 1     | 20.00% | 0 | 0 | 101 | 0 | 101 | 0 | 61 | 1 | 0 |
| E13 | 1     | 10.00% | 0 | 0 | 92  | 0 | 92  | 1 | 35 | 3 | 0 |
| B01 | 1     | 10.00% | 0 | 0 | 106 | 0 | 106 | 1 | 62 | 3 | 0 |



|     |       |        |   |   |     |   |     |   |    |   |   |
|-----|-------|--------|---|---|-----|---|-----|---|----|---|---|
| A04 | 1     | 10.00% | 0 | 0 | 112 | 0 | 112 | 1 | 42 | 2 | 0 |
| B10 | 0.5   | 40.00% | 0 | 0 | 105 | 0 | 105 | 1 | 36 | 2 | 0 |
| I05 | 1     | 5.00%  | 0 | 0 | 76  | 0 | 76  | 1 | 54 | 2 | 0 |
| B12 | 1     | 15.00% | 0 | 0 | 104 | 0 | 104 | 1 | 56 | 2 | 0 |
| G07 | 0.5   | 30.00% | 0 | 0 | 86  | 0 | 86  | 1 | 28 | 2 | 0 |
| I07 | 1     | 20.00% | 0 | 0 | 75  | 0 | 75  | 1 | 48 | 2 | 0 |
| A02 | 1-1.5 | 20.00% | 0 | 0 | 113 | 0 | 113 | 1 | 44 | 2 | 0 |
| E06 | 1     | 5.00%  | 0 | 0 | 93  | 0 | 93  | 1 | 36 | 2 | 0 |
| C05 | 1     | 15.00% | 0 | 1 | 67  | 1 | 81  | 0 | 55 | 3 | 0 |
| G04 | 1     | 15.00% | 0 | 1 | 33  | 1 | 33  | 0 | 33 | 3 | 0 |
| A03 | 1     | 10.00% | 0 | 0 | 112 | 1 | 27  | 0 | 63 | 3 | 0 |
| J14 | 1-1.5 | 20.00% | 0 | 0 | 69  | 1 | 69  | 0 | 36 | 3 | 0 |
| H12 | 1     | 20.00% | 0 | 1 | 17  | 1 | 17  | 1 | 9  | 4 | 1 |
| H14 | 1     | 20.00% | 0 | 1 | 26  | 1 | 26  | 1 | 49 | 3 | 0 |
| E12 | 1     | 5.00%  | 0 | 1 | 56  | 1 | 56  | 1 | 37 | 3 | 0 |
| J12 | 1     | 10.00% | 0 | 1 | 37  | 1 | 37  | 1 | 57 | 3 | 0 |
| G13 | 1     | 10.00% | 0 | 1 | 32  | 1 | 32  | 1 | 41 | 3 | 0 |
| B05 | 1     | 10.00% | 0 | 0 | 105 | 1 | 72  | 1 | 29 | 3 | 0 |
| B02 | 1     | 5.00%  | 0 | 1 | 83  | 1 | 83  | 1 | 66 | 2 | 0 |
| D12 | 1     | 20.00% | 0 | 1 | 57  | 1 | 36  | 1 | 69 | 2 | 0 |
| F05 | 1     | 20.00% | 0 | 1 | 33  | 1 | 33  | 1 | 79 | 2 | 0 |
| D02 | 1     | 20.00% | 0 | 1 | 59  | 1 | 55  | 1 | 63 | 2 | 0 |
| C09 | 0.5   | 30.00% | 0 | 0 | 100 | 1 | 63  | 1 | 44 | 2 | 0 |
| D01 | 1     | 10.00% | 0 | 0 | 98  | 1 | 49  | 1 | 31 | 2 | 0 |
| D10 | 1     | 15.00% | 0 | 0 | 96  | 1 | 50  | 1 | 63 | 2 | 0 |
| D08 | 0.5   | 20.00% | 0 | 0 | 97  | 0 | 97  | 0 | 42 | 2 | 0 |
| B06 | 0.5   | 20.00% | 0 | 0 | 105 | 0 | 105 | 0 | 36 | 2 | 0 |
| E08 | 0.5-1 | 15.00% | 0 | 0 | 93  | 0 | 93  | 0 | 18 | 2 | 0 |
| C12 | 0.5   | 20.00% | 0 | 0 | 99  | 0 | 99  | 0 | 52 | 2 | 0 |
| H04 | 0.5   | 10.00% | 0 | 0 | 81  | 0 | 81  | 0 | 38 | 1 | 0 |
| J05 | 0.5   | 25.00% | 0 | 0 | 71  | 0 | 71  | 1 | 37 | 2 | 0 |
| B16 | 0.5   | 10.00% | 0 | 0 | 102 | 0 | 102 | 1 | 6  | 2 | 0 |

|     |       |        |   |   |     |   |     |   |    |   |   |
|-----|-------|--------|---|---|-----|---|-----|---|----|---|---|
| C15 | 0.5   | 20.00% | 0 | 0 | 99  | 0 | 99  | 1 | 41 | 2 | 0 |
| F07 | 0.5   | 20.00% | 0 | 0 | 88  | 0 | 88  | 1 | 50 | 2 | 0 |
| C04 | 0.5   | 20.00% | 0 | 0 | 101 | 0 | 101 | 1 | 57 | 2 | 0 |
| B13 | 0.5   | 10.00% | 0 | 0 | 103 | 0 | 103 | 1 | 12 | 1 | 0 |
| C01 | 0.5   | 10.00% | 0 | 0 | 102 | 0 | 102 | 1 | 5  | 1 | 0 |
| C14 | 0.5   | 10.00% | 0 | 1 | 66  | 1 | 58  | 0 | 41 | 3 | 0 |
| F02 | 0.5   | 10.00% | 0 | 0 | 91  | 1 | 43  | 0 | 47 | 3 | 0 |
| A09 | 0.5   | 20.00% | 0 | 1 | 52  | 1 | 35  | 1 | 24 | 4 | 1 |
| F04 | 0.5   | 20.00% | 0 | 1 | 48  | 1 | 21  | 1 | 42 | 3 | 0 |
| E11 | 0.5-1 | 20.00% | 0 | 1 | 73  | 1 | 14  | 1 | 58 | 3 | 0 |
| C13 | 0.5   | 10.00% | 0 | 0 | 99  | 1 | 54  | 1 | 60 | 2 | 0 |
| B04 | 0     | 0.00%  | 0 | 0 | 106 | 0 | 106 | 0 | 46 | 2 | 0 |
| A16 | 0     | 0.00%  | 0 | 0 | 108 | 0 | 108 | 0 | 28 | 2 | 0 |
| A07 | 0     | 0.00%  | 0 | 0 | 111 | 0 | 111 | 0 | 11 | 1 | 0 |
| B15 | 0     | 0.00%  | 0 | 0 | 103 | 0 | 103 | 0 | 37 | 1 | 0 |
| D14 | 0     | 0.00%  | 0 | 0 | 95  | 0 | 95  | 0 | 26 | 1 | 0 |
| F12 | 0     | 0.00%  | 0 | 0 | 87  | 0 | 87  | 0 | 18 | 1 | 0 |
| G01 | 0     | 0.00%  | 0 | 0 | 87  | 0 | 87  | 1 | 20 | 3 | 0 |
| F03 | 0     | 0.00%  | 0 | 0 | 91  | 0 | 91  | 1 | 33 | 3 | 0 |
| I02 | 0     | 0.00%  | 0 | 0 | 77  | 0 | 77  | 1 | 40 | 2 | 0 |
| C11 | 0     | 0.00%  | 0 | 0 | 100 | 0 | 100 | 1 | 46 | 2 | 0 |
| I14 | 0     | 0.00%  | 0 | 0 | 74  | 0 | 74  | 1 | 15 | 2 | 0 |
| D11 | 0     | 0.00%  | 0 | 0 | 96  | 0 | 96  | 1 | 20 | 2 | 0 |
| B14 | 0     | 0.00%  | 0 | 0 | 103 | 0 | 103 | 1 | 66 | 2 | 0 |
| C03 | 0     | 0.00%  | 0 | 0 | 101 | 0 | 101 | 1 | 32 | 1 | 0 |
| F11 | 0     | 0.00%  | 0 | 0 | 88  | 0 | 88  | 1 | 38 | 1 | 0 |
| H02 | 0     | 0.00%  | 0 | 1 | 27  | 1 | 26  | 0 | 40 | 3 | 0 |
| H08 | 0     | 0.00%  | 0 | 1 | 34  | 1 | 34  | 0 | 58 | 3 | 0 |
| D15 | 0     | 0.00%  | 0 | 1 | 30  | 1 | 30  | 0 | 41 | 3 | 0 |
| C02 | 0     | 0.00%  | 0 | 0 | 101 | 1 | 62  | 0 | 43 | 3 | 0 |
| E07 | 0     | 0.00%  | 0 | 0 | 93  | 1 | 13  | 0 | 23 | 2 | 0 |
| J02 | 0     | 0.00%  | 0 | 1 | 26  | 1 | 26  | 1 | 41 | 2 | 0 |

|     |   |       |   |   |    |   |    |   |    |   |   |
|-----|---|-------|---|---|----|---|----|---|----|---|---|
| E15 | 0 | 0.00% | 0 | 0 | 92 | 1 | 26 | 1 | 40 | 2 | 0 |
| F09 | 0 | 0.00% | 0 | 0 | 88 | 1 | 41 | 1 | 32 | 2 | 0 |
